# Supplementary material for: Artificial Neural Networks Trained to Detect Viral and Phage Structural Proteins
Source: PLoS Comput Biol. 2012 Aug 23;8(8):e1002657. doi: 10.1371/journal.pcbi.1002657 (PMC3426561; doi:10.1371/journal.pcbi.1002657)
Supplement: Dataset S1 — Bacterial gene sequence annotations and ANN outputs. (XLSX) [file pcbi.1002657.s001.xlsx]

## Sheet: Count Summary
	Genome	#ProphageGenes		#Capsids	#Tails	# Capsids +Tails
	MG1655	167		0	5	5
	LT2	88		0	24	24
	COL	21		1	3	4
	Genome	Structural		Structural (Prophage)		Structural (Prophage Capsid or Tail)
	MG1655	780		44		4
	LT2	869		42		16
	COL	348		7		4
	Genome	MCP 1:1	MCP 22:1	MCP 1:1 (Prophage)	MCP 22:1 (Prophage)	MCP 1:1 (Prophage Capsid)	MCP 22:1 (Prophage Capsid)
	MG1655	213	17	2	0	0	0
	LT2	216	21	5	0	0	0
	COL	148	18	4	2	1	1
	Genome	Tail 1:1	Tail 6.6:1	Tail 1:1 (Prophage)	Tail 6.6:1 (Prophage)	Tail 1:1 (Prophage Tail)	Tail 6.6:1 (Prophage Tail)
	MG1655	773	120	44	8	5	0
	LT2	790	122	29	6	14	5
	COL	432	64	4	2	2	2

## Sheet: MG1655
Annotation	Structural	MCP 1:1	MCP 2:1	MCP 3:1	MCP 4:1	MCP 7:1	MCP Lambda:1	MCP Lambda2:1	Tail 1:1	Tail 2:1	Tail 3:1	Tail 4:1	Tail 7:1	Tail Lambda:1	Tail Lambda2:1	SDS	SD MCP 1:1	SD MCP 2:1	SD MCP 3:1	SD MCP 4:1	SD MCP 7:1	SD MCP Lambda:1	SD MCP Lambda2:1	SD Tail 1:1	SD Tail 2:1	SD Tail,3:1	SD Tail 4:1	SD Tail 7:1	SD Tail Lambda:1	SD Tail Lambda2:1
>gi|16127995|ref|NP_414542.1| thr operon leader peptide [Escherichia coli str. K-12 substr. MG1655]	0.524329	-0.570228	-0.93951	-0.807415	-0.997883	-0.712228	-0.997851	-0.956174	0.80727	0.891082	0.842158	0.81247	0.407982	0.468249	0.239222	0	0.743811	0.152122	0.532703	0.003834	0.60657	0.003621	0.070285	0.353867	0.153827	0.152056	0.185825	0.5248	0.617392	0.724537
>gi|16127996|ref|NP_414543.1| fused aspartokinase I and homoserine dehydrogenase I [Escherichia coli str. K-12 substr. MG1655]	-0.810289	-0.717437	-0.737066	-0.731857	-0.901783	-0.841201	-0.957578	-0.966006	-0.537207	-0.726193	-0.803907	-0.829212	-0.906522	-0.878099	-0.929746	0	0.197727	0.211901	0.131639	0.062414	0.086308	0.024362	0.021788	0.186279	0.187874	0.095314	0.096047	0.050145	0.047121	0.041413
>gi|16127997|ref|NP_414544.1| homoserine kinase [Escherichia coli str. K-12 substr. MG1655]	-0.698555	-0.998943	-0.99215	-0.987463	-0.994638	-0.990053	-0.999074	-0.995481	-0.492894	-0.667075	-0.789235	-0.793609	-0.869531	-0.845214	-0.893246	0	0.001056	0.008366	0.018441	0.015569	0.010679	0.001445	0.006183	0.272111	0.211972	0.122585	0.094508	0.049421	0.069786	0.082005
>gi|16127998|ref|NP_414545.1| threonine synthase [Escherichia coli str. K-12 substr. MG1655]	-0.6775	-0.129423	-0.291619	-0.246133	-0.517802	-0.615394	-0.757009	-0.912421	-0.689439	-0.803473	-0.887432	-0.919106	-0.944893	-0.924038	-0.941654	0	0.462993	0.431389	0.226931	0.357803	0.144291	0.153879	0.060444	0.180236	0.167462	0.077411	0.057879	0.030244	0.043525	0.034801
>gi|16127999|ref|NP_414546.1| predicted protein [Escherichia coli str. K-12 substr. MG1655]	-0.374514	-0.999994	-0.999999	-0.998852	-0.999939	-0.999986	-0.999958	-0.999997	-0.961479	-0.88038	-0.972222	-0.843786	-0.989323	-0.98494	-0.985676	0	1.7e-05	1e-06	0.003625	0.000162	3.7e-05	0.00012	4e-06	0.029073	0.141711	0.039578	0.361775	0.017954	0.030545	0.021661
>gi|16128000|ref|NP_414547.1| conserved protein, UPF0246 family [Escherichia coli str. K-12 substr. MG1655]	-0.249646	-0.642873	-0.61075	-0.376863	-0.852875	-0.748599	-0.908351	-0.936418	-0.845374	-0.946819	-0.98076	-0.981648	-0.98848	-0.979842	-0.991729	0	0.305559	0.392918	0.393331	0.191606	0.168669	0.101966	0.055002	0.052332	0.032796	0.015527	0.020532	0.012071	0.026026	0.011281
>gi|16128001|ref|NP_414548.1| predicted transporter [Escherichia coli str. K-12 substr. MG1655]	-0.623432	-0.999946	-0.99519	-0.996734	-0.999377	-0.99555	-0.999867	-0.999092	-0.067987	-0.475566	-0.676812	-0.839528	-0.876058	-0.908568	-0.928072	0	6.1e-05	0.013576	0.004461	0.0017	0.009522	0.000193	0.001291	0.608655	0.343869	0.225667	0.131521	0.132346	0.067537	0.060579
>gi|16128002|ref|NP_414549.1| transaldolase B [Escherichia coli str. K-12 substr. MG1655]	-0.241109	0.529122	0.25696	0.084537	0.065035	-0.224151	-0.536597	-0.790053	-0.643466	-0.831457	-0.925525	-0.916821	-0.963559	-0.958373	-0.970658	0	0.378577	0.368749	0.329532	0.445244	0.360981	0.287503	0.134239	0.149195	0.104467	0.048975	0.064769	0.0182	0.021111	0.027106
>gi|16128003|ref|NP_414550.1| molybdochelatase incorporating molybdenum into molybdopterin [Escherichia coli str. K-12 substr. MG1655]	-0.873045	-0.985748	-0.937923	-0.92763	-0.969666	-0.93208	-0.991883	-0.970619	-0.131945	-0.262675	-0.655395	-0.632366	-0.759696	-0.746496	-0.870793	0	0.014024	0.057531	0.082833	0.072698	0.075975	0.008822	0.036005	0.441721	0.317295	0.361853	0.220864	0.156768	0.101661	0.12009
>gi|16128004|ref|NP_414551.1| inner membrane protein, Grp1_Fun34_YaaH family [Escherichia coli str. K-12 substr. MG1655]	-0.984829	-0.999245	-0.998228	-0.990577	-0.999238	-0.992787	-0.999908	-0.996253	0.364564	-0.232234	-0.412777	-0.482249	-0.542034	-0.617267	-0.735517	0	0.001684	0.002546	0.015234	0.002115	0.016595	0.00015	0.006349	0.546836	0.491209	0.410681	0.403061	0.367521	0.312595	0.332068
>gi|16128005|ref|NP_414552.1| conserved protein, UPF0174 family [Escherichia coli str. K-12 substr. MG1655]	-0.972165	-0.999891	-0.999553	-0.983583	-0.998721	-0.999015	-0.999895	-0.999063	-0.951589	-0.949983	-0.987451	-0.992314	-0.994229	-0.992416	-0.994486	0	0.000306	0.000652	0.05072	0.003938	0.001212	0.000149	0.001871	0.05595	0.063783	0.013267	0.011657	0.005047	0.008947	0.006936
>gi|16128007|ref|NP_414554.1| conserved protein, UPF0412 family [Escherichia coli str. K-12 substr. MG1655]	0.577765	-0.966254	-0.981712	-0.994433	-0.993895	-0.9983	-0.999826	-0.999104	-0.663516	-0.749794	-0.760814	-0.902784	-0.96218	-0.931575	-0.963903	0	0.056016	0.038174	0.009819	0.014699	0.003099	0.000201	0.00161	0.224843	0.157751	0.277583	0.121202	0.033608	0.054256	0.048717
>gi|16128008|ref|NP_414555.1| chaperone Hsp70, co-chaperone with DnaJ [Escherichia coli str. K-12 substr. MG1655]	-0.345242	0.816314	0.613022	0.527494	0.43082	0.205603	-0.158539	-0.539599	-0.709667	-0.798802	-0.896031	-0.925559	-0.952579	-0.921805	-0.963553	0	0.181217	0.30411	0.355618	0.288994	0.248142	0.435315	0.19713	0.205975	0.14504	0.083016	0.074723	0.034334	0.050675	0.049641
>gi|16128009|ref|NP_414556.1| chaperone Hsp40, co-chaperone with DnaK [Escherichia coli str. K-12 substr. MG1655]	-0.395877	-0.997125	-0.991479	-0.975043	-0.994596	-0.988019	-0.991844	-0.994328	-0.742507	-0.653589	-0.821216	-0.553868	-0.92213	-0.826016	-0.805064	0	0.00483	0.02	0.038173	0.013636	0.012764	0.016619	0.005507	0.146022	0.266217	0.157218	0.575326	0.068106	0.202405	0.270597
>gi|16128010|ref|NP_414557.1| IS186 transposase [Escherichia coli str. K-12 substr. MG1655]	-0.854648	-0.999427	-0.998117	-0.992199	-0.998202	-0.996874	-0.999702	-0.998622	-0.729291	-0.877894	-0.914598	-0.955647	-0.97865	-0.968868	-0.957619	0	0.000608	0.002495	0.016204	0.003483	0.003316	0.000373	0.001464	0.110937	0.109899	0.08762	0.048829	0.019548	0.037003	0.051556
>gi|16128012|ref|NP_414559.1| regulatory protein for HokC, overlaps CDS of hokC [Escherichia coli str. K-12 substr. MG1655]	-0.887948	-0.970733	-0.90327	-0.898279	-0.949059	-0.812425	-0.959721	-0.927179	-0.877854	-0.950533	-0.935612	-0.974293	-0.987912	-0.976789	-0.988528	0	0.06527	0.113979	0.155785	0.113938	0.237981	0.075935	0.129124	0.228574	0.049117	0.07584	0.059966	0.014202	0.0377	0.016059
>gi|49175991|ref|YP_025292.1| toxic membrane protein, small [Escherichia coli str. K-12 substr. MG1655]	-0.993574	-0.963093	-0.989904	-0.971239	-0.981884	-0.971338	-0.995486	-0.990204	-0.794296	-0.873108	-0.937598	-0.968422	-0.986976	-0.968879	-0.987899	0	0.11513	0.019263	0.061532	0.054464	0.050103	0.012892	0.013771	0.315075	0.142366	0.057252	0.076155	0.014774	0.055207	0.01485
>gi|16128013|ref|NP_414560.1| sodium-proton antiporter [Escherichia coli str. K-12 substr. MG1655]	-0.999276	-0.99997	-0.999876	-0.997401	-0.999466	-0.998197	-0.999982	-0.99976	-0.505941	-0.743123	-0.765601	-0.907956	-0.92257	-0.930268	-0.941848	0	8e-05	0.000164	0.007703	0.001674	0.004893	3.8e-05	0.000365	0.424865	0.183361	0.20125	0.085986	0.10748	0.097292	0.055634
>gi|16128014|ref|NP_414561.1| DNA-binding transcriptional activator [Escherichia coli str. K-12 substr. MG1655]	-0.795044	-0.998562	-0.993485	-0.981511	-0.994367	-0.989944	-0.998907	-0.992609	-0.694626	-0.771734	-0.837152	-0.893549	-0.91456	-0.874182	-0.946721	0	0.001808	0.007668	0.025109	0.015835	0.008607	0.001051	0.009746	0.194337	0.14145	0.115189	0.052616	0.060316	0.061177	0.040168
>gi|16128015|ref|NP_414562.1| IS1 transposase B [Escherichia coli str. K-12 substr. MG1655]	-0.954384	-0.999983	-0.999963	-0.993527	-0.999879	-0.999672	-0.999949	-0.999741	-0.87325	-0.922908	-0.978044	-0.967058	-0.995082	-0.993197	-0.987225	0	2.3e-05	4e-05	0.020313	0.000368	0.000466	0.000114	0.000358	0.183656	0.076385	0.029747	0.061093	0.006789	0.008458	0.022716
>gi|16128016|ref|NP_414563.1| IS1 repressor TnpA [Escherichia coli str. K-12 substr. MG1655]	0.420349	-0.99971	-0.99992	-0.998909	-0.999947	-0.999767	-0.99995	-0.999855	-0.562361	-0.470095	-0.770836	-0.524889	-0.762455	-0.884105	-0.918159	0	0.000709	0.000187	0.00216	0.000106	0.000488	0.000104	0.000197	0.371109	0.496692	0.218844	0.52601	0.495158	0.12673	0.136366
>gi|16128017|ref|NP_414564.1| 30S ribosomal subunit protein S20 [Escherichia coli str. K-12 substr. MG1655]	-0.811771	-0.628087	-0.525378	-0.550824	-0.76079	-0.857971	-0.801223	-0.956746	-0.762398	-0.98243	-0.992834	-0.997668	-0.986568	-0.998225	-0.998595	0	0.617192	0.606977	0.394572	0.326079	0.18774	0.410732	0.08959	0.467203	0.034949	0.01233	0.003954	0.038066	0.002944	0.00291
>gi|16128018|ref|NP_414565.1| predicted protein [Escherichia coli str. K-12 substr. MG1655]	-0.306208	-0.999987	-0.999956	-0.997298	-0.999867	-0.998904	-0.999828	-0.999555	-0.602646	-0.85049	-0.862166	-0.9469	-0.9758	-0.920775	-0.975189	0	3.5e-05	7.1e-05	0.004064	0.000363	0.002223	0.000486	0.000861	0.459312	0.101252	0.190237	0.049626	0.028487	0.083206	0.024723
>gi|16128019|ref|NP_414566.1| bifunctional riboflavin kinase/FAD synthetase [Escherichia coli str. K-12 substr. MG1655]	-0.992471	-0.99743	-0.985431	-0.934148	-0.993601	-0.956727	-0.988696	-0.988005	-0.838227	-0.948612	-0.967586	-0.970539	-0.988815	-0.986405	-0.994647	0	0.004351	0.018647	0.087784	0.010434	0.047257	0.011918	0.011144	0.171349	0.050693	0.035029	0.04385	0.014201	0.018255	0.005401
>gi|16128020|ref|NP_414567.1| isoleucyl-tRNA synthetase [Escherichia coli str. K-12 substr. MG1655]	-0.907494	-0.981703	-0.986915	-0.963055	-0.990364	-0.983067	-0.993186	-0.993882	-0.436601	-0.639575	-0.764028	-0.804338	-0.91284	-0.896237	-0.909552	0	0.023276	0.01072	0.062423	0.019156	0.012884	0.006123	0.004604	0.214681	0.172388	0.128614	0.113576	0.035685	0.0437	0.040639
>gi|16128021|ref|NP_414568.1| prolipoprotein signal peptidase (signal peptidase II) [Escherichia coli str. K-12 substr. MG1655]	-0.99662	-0.981703	-0.986915	-0.963055	-0.990364	-0.983067	-0.993186	-0.993882	-0.436601	-0.639575	-0.764028	-0.804338	-0.91284	-0.896237	-0.909552	0	0.023276	0.01072	0.062423	0.019156	0.012884	0.006123	0.004604	0.214681	0.172388	0.128614	0.113576	0.035685	0.0437	0.040639
>gi|16128022|ref|NP_414569.1| FKBP-type peptidyl-prolyl cis-trans isomerase (rotamase) [Escherichia coli str. K-12 substr. MG1655]	-0.980215	-0.981703	-0.986915	-0.963055	-0.990364	-0.983067	-0.993186	-0.993882	-0.436601	-0.639575	-0.764028	-0.804338	-0.91284	-0.896237	-0.909552	0	0.023276	0.01072	0.062423	0.019156	0.012884	0.006123	0.004604	0.214681	0.172388	0.128614	0.113576	0.035685	0.0437	0.040639
>gi|16128023|ref|NP_414570.1| 4-hydroxy-3-methylbut-2-enyl diphosphate reductase, 4Fe-4S protein [Escherichia coli str. K-12 substr. MG1655]	-0.854343	-0.905149	-0.816931	-0.822877	-0.931794	-0.885264	-0.974641	-0.956568	-0.70733	-0.80551	-0.888699	-0.919851	-0.961421	-0.95116	-0.978155	0	0.096407	0.188718	0.148951	0.121306	0.087721	0.03012	0.045017	0.179004	0.160554	0.099159	0.066383	0.043206	0.026364	0.027336
>gi|16128024|ref|NP_414571.1| ribonucleoside hydrolase 3 [Escherichia coli str. K-12 substr. MG1655]	-0.803102	-0.99615	-0.970976	-0.959309	-0.988548	-0.953158	-0.995108	-0.990662	-0.358605	-0.623406	-0.766072	-0.837317	-0.862204	-0.892836	-0.903971	0	0.003459	0.028676	0.051585	0.031588	0.06956	0.007691	0.009064	0.297885	0.27044	0.130605	0.104472	0.079452	0.072136	0.087046
>gi|16128025|ref|NP_414572.1| dihydrodipicolinate reductase [Escherichia coli str. K-12 substr. MG1655]	-0.995688	-0.976928	-0.977536	-0.930908	-0.988281	-0.993461	-0.998612	-0.997077	-0.699309	-0.728451	-0.822721	-0.851377	-0.915446	-0.912155	-0.928893	0	0.020076	0.030784	0.111029	0.020352	0.005489	0.001897	0.003909	0.204547	0.187341	0.167461	0.116065	0.045397	0.073669	0.062929
>gi|16128026|ref|NP_414573.1| carbamoyl phosphate synthetase small subunit, glutamine amidotransferase [Escherichia coli str. K-12 substr. MG1655]	-0.957043	-0.914434	-0.973068	-0.956248	-0.955162	-0.983254	-0.994805	-0.996109	-0.759165	-0.785134	-0.875357	-0.909502	-0.947683	-0.948692	-0.941693	0	0.086137	0.025825	0.040384	0.05111	0.012111	0.00438	0.003802	0.145898	0.080327	0.071926	0.046743	0.030495	0.033413	0.049812
>gi|16128027|ref|NP_414574.1| carbamoyl-phosphate synthase large subunit [Escherichia coli str. K-12 substr. MG1655]	-0.923978	0.034496	0.013431	-0.01298	-0.325226	-0.374753	-0.724806	-0.793455	-0.477732	-0.659559	-0.780356	-0.810156	-0.865269	-0.837003	-0.9225	0	0.390805	0.245941	0.259466	0.269819	0.22077	0.138169	0.12827	0.243682	0.181661	0.166696	0.131088	0.066504	0.05772	0.073015
>gi|90111079|ref|NP_414576.4| DNA-binding transcriptional activator [Escherichia coli str. K-12 substr. MG1655]	-0.777439	-0.999725	-0.991879	-0.982336	-0.994009	-0.985032	-0.997878	-0.991101	-0.705405	-0.911492	-0.934681	-0.977079	-0.981893	-0.977636	-0.989313	0	0.0003	0.009775	0.051406	0.017696	0.01963	0.002968	0.016434	0.185311	0.08437	0.072432	0.017114	0.02659	0.023284	0.016561
>gi|90111080|ref|NP_414577.2| stimulator of CaiD and CaiB enzyme activities [Escherichia coli str. K-12 substr. MG1655]	-0.97888	-0.99998	-0.999806	-0.996543	-0.998798	-0.999366	-0.999881	-0.999371	-0.705771	-0.749698	-0.893038	-0.857788	-0.929346	-0.936838	-0.964325	0	3.3e-05	0.000327	0.009115	0.003729	0.000797	0.000256	0.000779	0.193509	0.11244	0.077993	0.099624	0.053605	0.058558	0.032523
>gi|221800779|ref|NP_414578.2| carnitinyl-CoA dehydratase [Escherichia coli str. K-12 substr. MG1655]	-0.184206	-0.437936	-0.583059	-0.409076	-0.839778	-0.80145	-0.945193	-0.954618	-0.341411	-0.618881	-0.744706	-0.769392	-0.845149	-0.847169	-0.871399	0	0.411761	0.326394	0.297686	0.148539	0.110981	0.051992	0.048301	0.327046	0.261222	0.132615	0.110652	0.069221	0.073355	0.08789
>gi|221800780|ref|NP_414579.4| probable crotonobetaine/carnitine-CoA ligase [Escherichia coli str. K-12 substr. MG1655]	-0.330156	-0.993304	-0.988682	-0.9751	-0.992301	-0.975348	-0.995532	-0.991303	-0.442517	-0.635761	-0.759439	-0.845051	-0.883717	-0.796941	-0.899179	0	0.007472	0.009969	0.02548	0.012948	0.024046	0.003054	0.009187	0.29664	0.128295	0.139016	0.095056	0.072884	0.064179	0.096717
>gi|16128032|ref|NP_414580.1| crotonobetainyl CoA:carnitine CoA transferase [Escherichia coli str. K-12 substr. MG1655]	-0.883151	-0.966047	-0.966405	-0.951859	-0.974756	-0.975495	-0.996632	-0.983922	0.228152	0.050891	-0.244624	-0.246289	-0.352443	-0.365201	-0.438	0	0.048294	0.034071	0.043084	0.059728	0.030201	0.002772	0.020129	0.340236	0.162493	0.306848	0.20401	0.258475	0.235621	0.289466
>gi|16128033|ref|NP_414581.1| crotonobetaine reductase subunit II, FAD-binding [Escherichia coli str. K-12 substr. MG1655]	-0.394722	-0.40827	-0.42031	-0.435563	-0.769923	-0.721468	-0.884329	-0.893161	0.623384	0.517793	0.366876	0.342624	0.085177	0.273627	0.245614	0	0.588977	0.402226	0.302867	0.168958	0.165973	0.114458	0.08907	0.178924	0.264313	0.189891	0.115291	0.265584	0.201795	0.283627
>gi|16128034|ref|NP_414582.1| predicted transporter [Escherichia coli str. K-12 substr. MG1655]	-0.81515	-0.999933	-0.99975	-0.998049	-0.999585	-0.993097	-0.999588	-0.999158	0.188647	-0.041086	-0.324428	-0.537192	-0.642411	-0.542167	-0.837331	0	7.6e-05	0.000444	0.005012	0.001247	0.019488	0.00092	0.001356	0.688716	0.551868	0.429383	0.207061	0.174621	0.307309	0.133879
>gi|90111081|ref|NP_414583.2| predicted electron transfer flavoprotein subunit, required for anaerobic carnitine reduction [Escherichia coli str. K-12 substr. MG1655]	0.425967	-0.671134	-0.734166	-0.686453	-0.893258	-0.751418	-0.956533	-0.958446	-0.766919	-0.834483	-0.876254	-0.952482	-0.976356	-0.968005	-0.972493	0	0.471046	0.22208	0.326169	0.175706	0.185144	0.064955	0.04686	0.126527	0.140296	0.165449	0.033949	0.02135	0.018382	0.039762
>gi|16128036|ref|NP_414584.1| predicted electron transfer flavoprotein, NAD/FAD-binding domain and ETFP adenine nucleotide-binding domain-like protein [Escherichia coli str. K-12 substr. MG1655]	0.326881	-0.564362	-0.690396	-0.795584	-0.82678	-0.879196	-0.967954	-0.964481	-0.578119	-0.752603	-0.831327	-0.892637	-0.953976	-0.968544	-0.950276	0	0.352227	0.15557	0.123461	0.114477	0.065163	0.028336	0.042617	0.187694	0.093661	0.141588	0.093417	0.051608	0.029685	0.052512
>gi|16128037|ref|NP_414585.1| predicted oxidoreductase with FAD/NAD(P)-binding domain [Escherichia coli str. K-12 substr. MG1655]	-0.997109	-0.564362	-0.690396	-0.795584	-0.82678	-0.879196	-0.967954	-0.964481	-0.578119	-0.752603	-0.831327	-0.892637	-0.953976	-0.968544	-0.950276	0	0.352227	0.15557	0.123461	0.114477	0.065163	0.028336	0.042617	0.187694	0.093661	0.141588	0.093417	0.051608	0.029685	0.052512
>gi|16128038|ref|NP_414586.1| predicted 4Fe-4S ferredoxin-type protein [Escherichia coli str. K-12 substr. MG1655]	-0.908635	-0.997732	-0.992088	-0.985484	-0.992405	-0.977314	-0.99498	-0.992131	-0.128218	-0.195116	0.05357	-0.185285	-0.247063	-0.036215	-0.031873	0	0.004374	0.016608	0.027463	0.020573	0.030659	0.009353	0.013316	0.436703	0.495982	0.381292	0.350396	0.407701	0.348828	0.466353
>gi|16128039|ref|NP_414587.1| predicted transporter [Escherichia coli str. K-12 substr. MG1655]	-0.937252	-0.999925	-0.997999	-0.995104	-0.998345	-0.989449	-0.999691	-0.997572	0.280269	-0.284111	-0.484407	-0.662902	-0.75151	-0.827853	-0.900456	0	0.000108	0.002412	0.008249	0.004794	0.024678	0.000399	0.00404	0.51125	0.451837	0.380766	0.17858	0.166862	0.11491	0.070774
>gi|16128040|ref|NP_414588.1| flavoprotein subunit for the KefC potassium efflux system [Escherichia coli str. K-12 substr. MG1655]	-0.997522	-1	-0.999999	-0.999598	-0.99998	-0.999998	-1	-0.999991	-0.842929	-0.693389	-0.910224	-0.881109	-0.973258	-0.991767	-0.928902	0	0	1e-06	0.001266	6.3e-05	4e-06	0	1.2e-05	0.159975	0.417227	0.126119	0.170849	0.028787	0.00757	0.1016
>gi|16128041|ref|NP_414589.1| potassium:proton antiporter [Escherichia coli str. K-12 substr. MG1655]	-0.998479	-0.996195	-0.977341	-0.932887	-0.988906	-0.970633	-0.997453	-0.986995	-0.404713	-0.640255	-0.672851	-0.835199	-0.870517	-0.900843	-0.88535	0	0.003943	0.03756	0.122103	0.027421	0.049101	0.003103	0.016826	0.308398	0.17804	0.303695	0.097162	0.06239	0.059888	0.144209
>gi|16128042|ref|NP_414590.1| dihydrofolate reductase [Escherichia coli str. K-12 substr. MG1655]	-0.860552	-0.999213	-0.998509	-0.988989	-0.995719	-0.997216	-0.999707	-0.998061	-0.110868	-0.4945	-0.561668	-0.631985	-0.820642	-0.82898	-0.873911	0	0.001104	0.001972	0.02676	0.012799	0.00319	0.000375	0.002949	0.213324	0.229266	0.182407	0.150528	0.08652	0.130762	0.098664
>gi|16128043|ref|NP_414591.1| diadenosine tetraphosphatase [Escherichia coli str. K-12 substr. MG1655]	-0.834749	-0.999246	-0.997971	-0.989023	-0.996988	-0.996013	-0.999031	-0.997829	0.060205	-0.256257	-0.380253	-0.338574	-0.502242	-0.559303	-0.630396	0	0.000846	0.0026	0.024566	0.009053	0.005083	0.001078	0.00273	0.411378	0.406966	0.306707	0.289302	0.256779	0.242094	0.145123
>gi|16128044|ref|NP_414592.1| protein associated with Co2+ and Mg2+ efflux [Escherichia coli str. K-12 substr. MG1655]	0.971285	-0.999246	-0.997971	-0.989023	-0.996988	-0.996013	-0.999031	-0.997829	0.060205	-0.256257	-0.380253	-0.338574	-0.502242	-0.559303	-0.630396	0	0.000846	0.0026	0.024566	0.009053	0.005083	0.001078	0.00273	0.411378	0.406966	0.306707	0.289302	0.256779	0.242094	0.145123
>gi|16128045|ref|NP_414593.1| 16S rRNA dimethyladenosine transferase, SAM-dependent [Escherichia coli str. K-12 substr. MG1655]	0.96861	-0.500931	-0.438907	-0.442265	-0.660035	-0.577898	-0.830219	-0.903692	-0.833922	-0.910364	-0.965641	-0.98405	-0.990518	-0.983075	-0.995058	0	0.50477	0.408607	0.355837	0.302126	0.174008	0.187598	0.040909	0.136981	0.073188	0.048089	0.010513	0.009563	0.01925	0.005278
>gi|16128046|ref|NP_414594.1| 4-hydroxy-L-threonine phosphate dehydrogenase, NAD-dependent [Escherichia coli str. K-12 substr. MG1655]	-0.994595	-0.966253	-0.973978	-0.946407	-0.978503	-0.957652	-0.997287	-0.987722	-0.57238	-0.662804	-0.874649	-0.903463	-0.908684	-0.953194	-0.947528	0	0.077709	0.024785	0.081693	0.06111	0.069969	0.004197	0.013334	0.289179	0.257086	0.089984	0.051329	0.076994	0.0396	0.058602
>gi|16128047|ref|NP_414595.1| peptidyl-prolyl cis-trans isomerase (PPIase) [Escherichia coli str. K-12 substr. MG1655]	0.844455	-0.966253	-0.973978	-0.946407	-0.978503	-0.957652	-0.997287	-0.987722	-0.57238	-0.662804	-0.874649	-0.903463	-0.908684	-0.953194	-0.947528	0	0.077709	0.024785	0.081693	0.06111	0.069969	0.004197	0.013334	0.289179	0.257086	0.089984	0.051329	0.076994	0.0396	0.058602
>gi|16128048|ref|NP_414596.1| LPS assembly OM complex LptDE, beta-barrel component [Escherichia coli str. K-12 substr. MG1655]	0.218601	-0.422127	-0.835514	-0.773849	-0.866315	-0.806477	-0.933006	-0.897104	0.375853	0.041301	-0.515446	-0.409876	-0.704993	-0.793201	-0.825003	0	0.34374	0.159367	0.154604	0.17751	0.16744	0.078499	0.11006	0.174012	0.197707	0.391337	0.267618	0.176611	0.170252	0.133465
>gi|16128049|ref|NP_414597.1| DnaJ-like protein, membrane anchored [Escherichia coli str. K-12 substr. MG1655]	0.400187	-0.984688	-0.971002	-0.913763	-0.980633	-0.976233	-0.997426	-0.992002	-0.69491	-0.88909	-0.987025	-0.957568	-0.996407	-0.986888	-0.975763	0	0.04512	0.042208	0.1288	0.035539	0.027128	0.003258	0.008503	0.448831	0.103117	0.015812	0.088054	0.003692	0.014775	0.052412
>gi|16128052|ref|NP_414600.1| pseudouridine synthase for 23S rRNA (position 746) and tRNAphe(position 32) [Escherichia coli str. K-12 substr. MG1655]	-0.368206	-0.984688	-0.971002	-0.913763	-0.980633	-0.976233	-0.997426	-0.992002	-0.69491	-0.88909	-0.987025	-0.957568	-0.996407	-0.986888	-0.975763	0	0.04512	0.042208	0.1288	0.035539	0.027128	0.003258	0.008503	0.448831	0.103117	0.015812	0.088054	0.003692	0.014775	0.052412
>gi|16128053|ref|NP_414601.1| RNA polymerase-associated helicase protein (ATPase and RNA polymerase recycling factor) [Escherichia coli str. K-12 substr. MG1655]	-0.933277	-0.984688	-0.971002	-0.913763	-0.980633	-0.976233	-0.997426	-0.992002	-0.69491	-0.88909	-0.987025	-0.957568	-0.996407	-0.986888	-0.975763	0	0.04512	0.042208	0.1288	0.035539	0.027128	0.003258	0.008503	0.448831	0.103117	0.015812	0.088054	0.003692	0.014775	0.052412
>gi|16128054|ref|NP_414602.1| DNA polymerase II [Escherichia coli str. K-12 substr. MG1655]	-0.689466	-0.991851	-0.969058	-0.948091	-0.985818	-0.971041	-0.986148	-0.982844	-0.762185	-0.876743	-0.940532	-0.955555	-0.977788	-0.974376	-0.973695	0	0.00716	0.027988	0.058251	0.030399	0.022625	0.016737	0.010751	0.128737	0.051276	0.05556	0.029706	0.015569	0.03017	0.019542
>gi|16128055|ref|NP_414603.1| L-ribulose-5-phosphate 4-epimerase [Escherichia coli str. K-12 substr. MG1655]	-0.46873	-0.997866	-0.997643	-0.980162	-0.994154	-0.996919	-0.999305	-0.996324	-0.395992	-0.619304	-0.784378	-0.805128	-0.917869	-0.93354	-0.937433	0	0.00174	0.002516	0.054566	0.014229	0.003157	0.001037	0.004109	0.231696	0.181657	0.122916	0.092011	0.055624	0.040258	0.03487
>gi|16128056|ref|NP_414604.1| L-arabinose isomerase [Escherichia coli str. K-12 substr. MG1655]	-0.961357	-0.99428	-0.987236	-0.978435	-0.985519	-0.992413	-0.997157	-0.995816	-0.658486	-0.763567	-0.884338	-0.91704	-0.965091	-0.955821	-0.957004	0	0.005877	0.020861	0.034549	0.022336	0.006432	0.002168	0.00366	0.205646	0.118098	0.086127	0.068654	0.031505	0.022572	0.031662
>gi|16128057|ref|NP_414605.1| L-ribulokinase [Escherichia coli str. K-12 substr. MG1655]	-0.686002	-0.99972	-0.998051	-0.994645	-0.998642	-0.997563	-0.999565	-0.998877	-0.327008	-0.595351	-0.697802	-0.817533	-0.895622	-0.901533	-0.847887	0	0.000261	0.002147	0.013371	0.00397	0.001844	0.000562	0.001363	0.131417	0.263577	0.156575	0.091476	0.067147	0.088917	0.110713
>gi|16128058|ref|NP_414606.1| DNA-binding transcriptional dual regulator [Escherichia coli str. K-12 substr. MG1655]	-0.569878	-0.999929	-0.999785	-0.996943	-0.999622	-0.999454	-0.999917	-0.999512	-0.881552	-0.902556	-0.951385	-0.963886	-0.986347	-0.983396	-0.974073	0	6.4e-05	0.000287	0.007071	0.001076	0.000535	0.000138	0.000729	0.066039	0.088755	0.063136	0.03336	0.01169	0.016468	0.026596
>gi|16128059|ref|NP_414607.1| inner membrane protein, SNARE_assoc family [Escherichia coli str. K-12 substr. MG1655]	-0.998593	-0.999999	-0.99999	-0.992708	-0.999937	-0.999521	-0.999991	-0.999941	-0.305666	-0.545822	-0.588727	-0.754523	-0.876136	-0.928912	-0.948367	0	1e-06	1.8e-05	0.023045	0.000198	0.001441	2.3e-05	8.8e-05	0.53465	0.288744	0.383929	0.361512	0.164979	0.116983	0.057838
>gi|16128060|ref|NP_414608.1| thiamin transporter subunit [Escherichia coli str. K-12 substr. MG1655]	0.143323	-0.999786	-0.997607	-0.989561	-0.997889	-0.997711	-0.999732	-0.99858	-0.479079	-0.770458	-0.775018	-0.916852	-0.935071	-0.952299	-0.939626	0	0.000357	0.004298	0.02652	0.005916	0.00409	0.000575	0.001493	0.236874	0.118618	0.193799	0.054605	0.126463	0.056384	0.069133
>gi|16128061|ref|NP_414609.1| fused thiamin transporter subunits of ABC superfamily: membrane components [Escherichia coli str. K-12 substr. MG1655]	-0.997928	-0.999976	-0.997749	-0.988291	-0.998988	-0.991718	-0.999673	-0.998018	-0.382449	-0.772905	-0.814532	-0.884221	-0.951336	-0.963482	-0.957095	0	3.5e-05	0.003367	0.02952	0.003033	0.015531	0.000415	0.002734	0.319355	0.181667	0.180931	0.187965	0.080245	0.048504	0.060776
>gi|16128062|ref|NP_414610.1| thiamin transporter subunit [Escherichia coli str. K-12 substr. MG1655]	-0.936582	-0.154914	-0.266366	-0.454432	-0.763763	-0.390695	-0.793876	-0.771877	-0.225008	-0.613212	-0.792024	-0.76963	-0.91478	-0.891008	-0.896031	0	0.646174	0.451839	0.311424	0.275034	0.346911	0.203483	0.224621	0.335318	0.258441	0.145603	0.244479	0.065508	0.073846	0.05995
>gi|16128063|ref|NP_414611.1| transcriptional DNA-binding transcriptional activator of sgrS sRNA [Escherichia coli str. K-12 substr. MG1655]	-0.950712	-0.999988	-0.999786	-0.99537	-0.999733	-0.999772	-0.999953	-0.999649	-0.697565	-0.775609	-0.835427	-0.921556	-0.968266	-0.986693	-0.947834	0	2.2e-05	0.000351	0.014203	0.000796	0.000241	7.7e-05	0.000475	0.178626	0.226794	0.189972	0.099917	0.058709	0.01087	0.047882
>gi|226524697|ref|YP_002791237.1| Inhibitor of glucose uptake [Escherichia coli str. K-12 substr. MG1655]	-0.489347	-0.99963	-0.997972	-0.96609	-0.998557	-0.995524	-0.99806	-0.994105	0.101795	-0.493895	-0.67671	-0.685026	-0.923216	-0.841999	-0.799633	0	0.000832	0.002314	0.10423	0.003886	0.004723	0.00383	0.009321	0.708391	0.523663	0.453354	0.360261	0.111073	0.156982	0.363179
>gi|49175994|ref|YP_025293.1| broad specificity sugar efflux system [Escherichia coli str. K-12 substr. MG1655]	-0.978365	-0.999636	-0.991254	-0.98535	-0.997202	-0.970163	-0.99849	-0.994532	0.050386	-0.499797	-0.793643	-0.843166	-0.913814	-0.919557	-0.937543	0	0.000561	0.012553	0.021493	0.005323	0.064271	0.003125	0.008165	0.546344	0.350194	0.132977	0.107439	0.099248	0.068629	0.061197
>gi|16128065|ref|NP_414613.1| 3-isopropylmalate dehydratase small subunit [Escherichia coli str. K-12 substr. MG1655]	-0.909433	-0.357467	-0.466953	-0.560865	-0.87083	-0.787578	-0.945757	-0.963484	-0.847079	-0.867998	-0.951793	-0.971982	-0.977256	-0.959539	-0.976279	0	0.549237	0.55182	0.371113	0.124226	0.124126	0.04714	0.0372	0.125446	0.158285	0.037956	0.021338	0.023354	0.031081	0.019425
>gi|16128066|ref|NP_414614.1| 3-isopropylmalate dehydratase large subunit [Escherichia coli str. K-12 substr. MG1655]	-0.935127	-0.955389	-0.965222	-0.960645	-0.974472	-0.974271	-0.995474	-0.991255	-0.457453	-0.55848	-0.75507	-0.777478	-0.857452	-0.849415	-0.896989	0	0.048081	0.022444	0.03889	0.032608	0.017554	0.006589	0.006429	0.287284	0.197964	0.206471	0.117929	0.071083	0.107051	0.098819
>gi|90111082|ref|NP_414615.4| 3-isopropylmalate dehydrogenase, NAD(+)-dependent [Escherichia coli str. K-12 substr. MG1655]	-0.957263	-0.955389	-0.965222	-0.960645	-0.974472	-0.974271	-0.995474	-0.991255	-0.457453	-0.55848	-0.75507	-0.777478	-0.857452	-0.849415	-0.896989	0	0.048081	0.022444	0.03889	0.032608	0.017554	0.006589	0.006429	0.287284	0.197964	0.206471	0.117929	0.071083	0.107051	0.098819
>gi|16128068|ref|NP_414616.1| 2-isopropylmalate synthase [Escherichia coli str. K-12 substr. MG1655]	-0.910759	-0.592669	-0.794374	-0.818276	-0.830338	-0.912969	-0.980161	-0.9754	-0.835081	-0.855058	-0.937245	-0.959913	-0.979474	-0.976971	-0.988157	0	0.391907	0.132886	0.083951	0.130451	0.060382	0.013611	0.023695	0.109067	0.113433	0.036564	0.029214	0.021913	0.018787	0.014112
>gi|16128069|ref|NP_414617.1| leu operon leader peptide [Escherichia coli str. K-12 substr. MG1655]	-0.316473	-0.999991	-0.999928	-0.998563	-0.999349	-0.999884	-0.999866	-0.999878	-0.650162	-0.754576	-0.772556	-0.986228	-0.984393	-0.942264	-0.965776	0	1.7e-05	0.00012	0.004158	0.001593	0.00018	0.000276	0.000207	0.568802	0.440391	0.526096	0.016917	0.02797	0.08657	0.080147
>gi|90111083|ref|NP_414618.4| DNA-binding transcriptional activator [Escherichia coli str. K-12 substr. MG1655]	-0.262517	-0.996832	-0.99234	-0.96606	-0.992741	-0.992627	-0.997889	-0.993948	-0.891274	-0.909963	-0.94613	-0.978688	-0.990182	-0.978891	-0.992359	0	0.004089	0.007701	0.067935	0.01538	0.005185	0.003621	0.008278	0.102128	0.070287	0.07248	0.018753	0.012139	0.029276	0.010354
>gi|90111084|ref|YP_025294.2| acetolactate synthase III, large subunit [Escherichia coli str. K-12 substr. MG1655]	-0.267706	-0.997483	-0.987784	-0.964939	-0.98693	-0.987629	-0.997074	-0.991559	-0.301007	-0.56289	-0.806013	-0.806246	-0.915896	-0.924514	-0.937979	0	0.002667	0.013144	0.086217	0.03236	0.011157	0.00482	0.008512	0.278529	0.177433	0.12128	0.118446	0.045104	0.047935	0.036017
>gi|16128071|ref|NP_414620.1| acetolactate synthase III, thiamin-dependent, small subunit [Escherichia coli str. K-12 substr. MG1655]	-0.992066	-0.976844	-0.953075	-0.934221	-0.973738	-0.945932	-0.989691	-0.98118	-0.512887	-0.773239	-0.928509	-0.945621	-0.983238	-0.952796	-0.982511	0	0.063978	0.048324	0.15601	0.04297	0.048518	0.01194	0.023408	0.320152	0.175591	0.067501	0.048986	0.015064	0.053225	0.017296
>gi|16128073|ref|NP_414622.1| DNA-binding transcriptional dual regulator [Escherichia coli str. K-12 substr. MG1655]	-0.410059	-0.869828	-0.658867	-0.599951	-0.887836	-0.749115	-0.89414	-0.900281	-0.91248	-0.951687	-0.971984	-0.990138	-0.99214	-0.991379	-0.994871	0	0.132787	0.271535	0.229585	0.082074	0.133845	0.091138	0.06259	0.059146	0.048552	0.032077	0.009748	0.008503	0.009107	0.006861
>gi|16128074|ref|NP_414623.1| conserved protein, MraZ family [Escherichia coli str. K-12 substr. MG1655]	-0.97804	-0.999854	-0.993009	-0.974554	-0.990373	-0.993202	-0.999414	-0.993084	-0.568485	-0.71592	-0.709945	-0.834513	-0.902765	-0.864738	-0.887694	0	0.000144	0.010301	0.065514	0.028905	0.008779	0.001161	0.009838	0.306802	0.163702	0.269509	0.111882	0.074315	0.121542	0.162658
>gi|16128075|ref|NP_414624.1| 16S rRNA m(4)C1402 methyltranserfase, SAM-dependent [Escherichia coli str. K-12 substr. MG1655]	-0.87759	-0.999854	-0.993009	-0.974554	-0.990373	-0.993202	-0.999414	-0.993084	-0.568485	-0.71592	-0.709945	-0.834513	-0.902765	-0.864738	-0.887694	0	0.000144	0.010301	0.065514	0.028905	0.008779	0.001161	0.009838	0.306802	0.163702	0.269509	0.111882	0.074315	0.121542	0.162658
>gi|16128076|ref|NP_414625.1| membrane bound cell division protein at septum containing leucine zipper motif [Escherichia coli str. K-12 substr. MG1655]	-0.999587	-0.999671	-0.999089	-0.988507	-0.998183	-0.999076	-0.999843	-0.998916	-0.907294	-0.851041	-0.940667	-0.984544	-0.990266	-0.9865	-0.992836	0	0.00099	0.001761	0.034766	0.005541	0.000975	0.000227	0.001086	0.096621	0.155167	0.063318	0.020381	0.011524	0.018549	0.010793
>gi|16128077|ref|NP_414626.1| transpeptidase involved in septal peptidoglycan synthesis (penicillin-binding protein 3) [Escherichia coli str. K-12 substr. MG1655]	-0.246168	-0.999671	-0.999089	-0.988507	-0.998183	-0.999076	-0.999843	-0.998916	-0.907294	-0.851041	-0.940667	-0.984544	-0.990266	-0.9865	-0.992836	0	0.00099	0.001761	0.034766	0.005541	0.000975	0.000227	0.001086	0.096621	0.155167	0.063318	0.020381	0.011524	0.018549	0.010793
>gi|16128078|ref|NP_414627.1| UDP-N-acetylmuramoyl-L-alanyl-D-glutamate:meso-diaminopimelate ligase [Escherichia coli str. K-12 substr. MG1655]	-0.973219	-0.999218	-0.995507	-0.978325	-0.995071	-0.995359	-0.99955	-0.997224	-0.736373	-0.772605	-0.872484	-0.888475	-0.945942	-0.958514	-0.959956	0	0.000474	0.00503	0.054114	0.014038	0.004303	0.000698	0.00311	0.127148	0.159665	0.104097	0.086049	0.035415	0.036762	0.031819
>gi|16128079|ref|NP_414628.1| UDP-N-acetylmuramoyl-tripeptide:D-alanyl-D-alanine ligase [Escherichia coli str. K-12 substr. MG1655]	-0.234674	-0.869	-0.886572	-0.90903	-0.972755	-0.958318	-0.992994	-0.988017	-0.025396	-0.474434	-0.463793	-0.625282	-0.786136	-0.849562	-0.781556	0	0.112436	0.08811	0.117065	0.031434	0.031379	0.01104	0.011369	0.202099	0.262957	0.178785	0.177477	0.11291	0.101879	0.127203
>gi|16128080|ref|NP_414629.1| phospho-N-acetylmuramoyl-pentapeptide transferase [Escherichia coli str. K-12 substr. MG1655]	-0.999377	-0.999735	-0.999339	-0.989418	-0.999339	-0.984913	-0.999295	-0.998211	-0.312692	-0.667228	-0.8393	-0.914169	-0.95831	-0.951715	-0.963721	0	0.000793	0.00109	0.030845	0.001894	0.037808	0.001567	0.002527	0.50541	0.226922	0.131875	0.098803	0.042752	0.052544	0.036103
>gi|16128081|ref|NP_414630.1| UDP-N-acetylmuramoyl-L-alanine:D-glutamate ligase [Escherichia coli str. K-12 substr. MG1655]	-0.843122	-0.935837	-0.866139	-0.8814	-0.97053	-0.932769	-0.989589	-0.981209	-0.156916	-0.452816	-0.527617	-0.569027	-0.683252	-0.700366	-0.7048	0	0.063247	0.137316	0.119035	0.055263	0.050635	0.011465	0.016978	0.258055	0.289157	0.183334	0.280386	0.151371	0.130754	0.278913
>gi|16128082|ref|NP_414631.1| integral membrane protein involved in stabilizing FstZ ring during cell division [Escherichia coli str. K-12 substr. MG1655]	-0.998303	-0.999959	-0.996471	-0.990353	-0.998202	-0.984588	-0.999452	-0.996742	-0.168699	-0.716128	-0.754063	-0.904741	-0.932754	-0.927877	-0.953723	0	6.3e-05	0.005314	0.022842	0.00526	0.037836	0.00067	0.005235	0.469695	0.206407	0.265569	0.061554	0.098528	0.073295	0.042511
>gi|16128083|ref|NP_414632.1| N-acetylglucosaminyl transferase [Escherichia coli str. K-12 substr. MG1655]	0.010531	-0.9998	-0.992456	-0.97685	-0.997778	-0.995053	-0.999561	-0.997984	-0.442619	-0.771135	-0.828965	-0.92071	-0.960816	-0.951906	-0.939294	0	0.000246	0.018329	0.069731	0.005679	0.007561	0.000546	0.002314	0.245535	0.179944	0.232746	0.151595	0.069901	0.092572	0.08038
>gi|16128084|ref|NP_414633.1| UDP-N-acetylmuramate:L-alanine ligase [Escherichia coli str. K-12 substr. MG1655]	-0.980866	-0.77362	-0.790582	-0.691611	-0.889419	-0.909341	-0.976037	-0.970654	-0.811593	-0.845524	-0.932352	-0.952203	-0.967303	-0.970615	-0.984955	0	0.249335	0.157553	0.241469	0.100891	0.061361	0.023046	0.02356	0.143641	0.083587	0.064816	0.038273	0.024476	0.025872	0.015128
>gi|16128085|ref|NP_414634.1| D-alanine:D-alanine ligase [Escherichia coli str. K-12 substr. MG1655]	-0.530041	-0.991663	-0.944532	-0.913845	-0.984114	-0.979941	-0.99673	-0.983097	0.621111	0.368611	0.050144	0.095124	-0.178977	-0.207064	-0.258189	0	0.009889	0.09857	0.187913	0.039689	0.018998	0.005062	0.023123	0.148449	0.19354	0.299341	0.27743	0.209615	0.355568	0.387024
>gi|16128086|ref|NP_414635.1| Divisome assembly protein, membrane anchored protein involved in growth of wall at septum [Escherichia coli str. K-12 substr. MG1655]	0.48238	-0.843221	-0.356703	-0.567954	-0.607916	-0.555888	-0.885692	-0.816551	-0.167172	-0.559518	-0.821416	-0.88264	-0.944172	-0.964675	-0.948493	0	0.220542	0.442954	0.331987	0.468023	0.27876	0.122209	0.10987	0.270638	0.349498	0.154274	0.067263	0.054361	0.031698	0.042983
>gi|16128087|ref|NP_414636.1| ATP-binding cell division protein involved in recruitment of FtsK to Z ring [Escherichia coli str. K-12 substr. MG1655]	-0.886866	-0.999286	-0.995315	-0.986367	-0.995163	-0.995832	-0.999485	-0.997298	-0.670124	-0.725092	-0.871202	-0.865688	-0.947616	-0.925434	-0.965544	0	0.001492	0.009831	0.039411	0.014717	0.004438	0.001271	0.003153	0.184179	0.167316	0.097492	0.085358	0.029652	0.050655	0.033319
>gi|16128088|ref|NP_414637.1| GTP-binding tubulin-like cell division protein [Escherichia coli str. K-12 substr. MG1655]	-0.947955	0.402291	0.072088	0.203125	-0.440315	-0.181162	-0.814955	-0.616793	0.235855	0.000909	-0.477558	-0.40536	-0.516841	-0.614428	-0.563434	0	0.680527	0.580123	0.583632	0.542913	0.432371	0.183032	0.285704	0.325756	0.309933	0.301821	0.340778	0.270561	0.184253	0.401385
>gi|16128089|ref|NP_414638.1| UDP-3-O-acyl N-acetylglucosamine deacetylase [Escherichia coli str. K-12 substr. MG1655]	-0.89932	-0.666963	-0.646891	-0.519346	-0.856616	-0.710611	-0.886447	-0.950394	-0.756343	-0.839281	-0.911773	-0.944641	-0.955893	-0.934096	-0.971211	0	0.297278	0.281322	0.381652	0.160694	0.162526	0.142639	0.035551	0.162176	0.165473	0.060248	0.063862	0.049569	0.03743	0.027628
>gi|90111085|ref|NP_414639.2| regulator of secA translation [Escherichia coli str. K-12 substr. MG1655]	-0.279925	-0.999675	-0.999565	-0.992605	-0.998989	-0.99881	-0.999836	-0.99932	-0.665236	-0.833472	-0.857993	-0.962376	-0.898466	-0.956063	-0.93706	0	0.000482	0.000579	0.02047	0.002129	0.001362	0.000308	0.000899	0.316442	0.161334	0.270453	0.0495	0.2374	0.091835	0.080603
>gi|16128091|ref|NP_414640.1| preprotein translocase subunit, ATPase [Escherichia coli str. K-12 substr. MG1655]	-0.890746	-0.658643	-0.504363	-0.513478	-0.790722	-0.781306	-0.943384	-0.91842	-0.822482	-0.883527	-0.935765	-0.961696	-0.964875	-0.962004	-0.981376	0	0.429534	0.311534	0.331933	0.227444	0.117934	0.06583	0.076641	0.115815	0.079976	0.048832	0.029522	0.029564	0.027542	0.022787
>gi|16128092|ref|NP_414641.1| nucleoside triphosphate pyrophosphohydrolase, marked preference for dGTP [Escherichia coli str. K-12 substr. MG1655]	-0.983914	-0.988456	-0.941968	-0.913161	-0.956342	-0.96904	-0.996947	-0.986646	-0.09677	-0.642923	-0.466364	-0.551603	-0.748366	-0.842828	-0.732106	0	0.019944	0.100559	0.226147	0.131501	0.063539	0.006823	0.015607	0.468356	0.131273	0.513374	0.504607	0.238846	0.125407	0.271213
>gi|16128094|ref|NP_414643.1| DNA gyrase inhibitor [Escherichia coli str. K-12 substr. MG1655]	-0.446988	-0.998724	-0.999578	-0.999341	-0.99988	-0.998854	-0.999979	-0.99953	0.854868	0.916225	0.839736	0.850048	0.785984	0.858313	0.754527	0	0.003852	0.000891	0.001723	0.000363	0.002834	4.7e-05	0.000855	0.202454	0.076277	0.193444	0.118901	0.146011	0.139702	0.272857
>gi|16128095|ref|NP_414644.1| conserved protein [Escherichia coli str. K-12 substr. MG1655]	-0.994479	-0.999171	-0.984726	-0.97297	-0.9946	-0.986892	-0.996185	-0.995693	-0.833161	-0.874185	-0.833533	-0.979189	-0.983916	-0.977012	-0.978312	0	0.001099	0.022817	0.0427	0.012682	0.011963	0.006295	0.00616	0.097301	0.142623	0.267322	0.017219	0.019252	0.036901	0.025536
>gi|16128096|ref|NP_414645.1| dephospho-CoA kinase [Escherichia coli str. K-12 substr. MG1655]	-0.763902	-0.75528	-0.771584	-0.723769	-0.865621	-0.882403	-0.970796	-0.95823	-0.859834	-0.92585	-0.949668	-0.993773	-0.995705	-0.996919	-0.996522	0	0.465613	0.141088	0.253064	0.151461	0.085853	0.031183	0.044814	0.292426	0.051992	0.077371	0.006225	0.006128	0.00405	0.006079
>gi|16128097|ref|NP_414646.1| GMP reductase [Escherichia coli str. K-12 substr. MG1655]	-0.581884	-0.980142	-0.988884	-0.980027	-0.995019	-0.991595	-0.998428	-0.996344	0.396408	0.20386	0.029873	-0.013482	-0.319255	-0.302222	-0.435173	0	0.028503	0.011277	0.025207	0.006612	0.005795	0.001699	0.004647	0.265118	0.351378	0.261031	0.281128	0.279098	0.278139	0.287741
>gi|16128099|ref|NP_414648.1| assembly protein in type IV pilin biogenesis, transmembrane protein [Escherichia coli str. K-12 substr. MG1655]	-0.994391	-0.999964	-0.99843	-0.986606	-0.998513	-0.998872	-0.999804	-0.998862	-0.475964	-0.738947	-0.657918	-0.913876	-0.936455	-0.960638	-0.952364	0	7.7e-05	0.002427	0.039416	0.00435	0.002148	0.000315	0.001541	0.304057	0.157269	0.468231	0.075053	0.108911	0.05367	0.045811
>gi|16128100|ref|NP_414649.1| conserved protein with nucleoside triphosphate hydrolase domain [Escherichia coli str. K-12 substr. MG1655]	-0.962834	-0.999898	-0.999136	-0.992032	-0.997378	-0.99818	-0.999784	-0.99791	-0.835362	-0.809147	-0.902749	-0.961388	-0.974373	-0.979475	-0.985673	0	0.000261	0.000998	0.021076	0.007924	0.002109	0.000301	0.002049	0.107947	0.125424	0.091537	0.040588	0.029394	0.022606	0.019818
>gi|16128101|ref|NP_414650.1| predicted major pilin subunit [Escherichia coli str. K-12 substr. MG1655]	0.995128	-0.984529	-0.957869	-0.964463	-0.988117	-0.954582	-0.988494	-0.98383	0.838962	0.766227	0.349778	0.488813	0.142664	0.343386	0.290459	0	0.022995	0.061729	0.028981	0.023998	0.053578	0.015954	0.015075	0.083386	0.092049	0.320907	0.141185	0.145259	0.185964	0.243895
>gi|16128102|ref|NP_414651.1| quinolinate phosphoribosyltransferase [Escherichia coli str. K-12 substr. MG1655]	-0.950849	-0.729483	-0.744782	-0.768652	-0.911577	-0.868988	-0.969341	-0.969023	-0.293264	-0.54212	-0.665319	-0.716153	-0.861524	-0.825765	-0.9032	0	0.222452	0.15455	0.197576	0.0852	0.082169	0.026036	0.030688	0.279257	0.242097	0.171568	0.19556	0.083724	0.083784	0.070233
>gi|16128103|ref|NP_414652.1| 1,6-anhydro-N-acetylmuramyl-L-alanine amidase, Zn-dependent; murein amidase [Escherichia coli str. K-12 substr. MG1655]	-0.636359	-0.99975	-0.998366	-0.994651	-0.998415	-0.997228	-0.999525	-0.998388	-0.604842	-0.56747	-0.778686	-0.898803	-0.928428	-0.947236	-0.952327	0	0.000242	0.003749	0.009173	0.004698	0.004724	0.000571	0.002206	0.189501	0.376875	0.289129	0.08625	0.047255	0.040139	0.044876
>gi|16128104|ref|NP_414653.1| predicted inner membrane protein [Escherichia coli str. K-12 substr. MG1655]	-0.999646	-0.999995	-0.999866	-0.985677	-0.999763	-0.998425	-0.999927	-0.999296	-0.69493	-0.818297	-0.897608	-0.949017	-0.980167	-0.97052	-0.972156	0	7e-06	0.000236	0.044913	0.000722	0.003985	0.000108	0.0012	0.236585	0.127915	0.108996	0.068767	0.027549	0.048777	0.02925
>gi|16128105|ref|NP_414654.1| aromatic amino acid transporter [Escherichia coli str. K-12 substr. MG1655]	-0.977746	-0.999458	-0.998593	-0.990636	-0.998781	-0.990314	-0.999793	-0.997923	-0.163102	-0.584405	-0.796598	-0.891899	-0.93972	-0.931091	-0.949003	0	0.001494	0.001691	0.02381	0.003449	0.020613	0.00025	0.002563	0.580682	0.283364	0.128054	0.093022	0.038121	0.058269	0.032554
>gi|16128106|ref|NP_414655.1| DNA-binding transcriptional dual regulator [Escherichia coli str. K-12 substr. MG1655]	-0.902865	-0.999333	-0.995496	-0.954701	-0.99144	-0.995444	-0.999722	-0.990827	-0.960406	-0.951062	-0.977166	-0.994158	-0.992104	-0.992161	-0.997532	0	0.001272	0.005903	0.12091	0.024317	0.006616	0.000513	0.012744	0.031533	0.077818	0.03319	0.010531	0.009332	0.015839	0.003591
>gi|16128107|ref|NP_414656.1| pyruvate dehydrogenase, decarboxylase component E1, thiamin-binding [Escherichia coli str. K-12 substr. MG1655]	-0.699679	-0.842291	-0.917106	-0.864658	-0.937516	-0.948671	-0.976871	-0.972076	-0.484717	-0.652027	-0.819018	-0.781046	-0.897263	-0.895272	-0.897852	0	0.123222	0.056317	0.105913	0.071388	0.018451	0.017571	0.017913	0.137829	0.075403	0.09213	0.081207	0.031645	0.032271	0.032902
>gi|16128108|ref|NP_414657.1| pyruvate dehydrogenase, dihydrolipoyltransacetylase component E2 [Escherichia coli str. K-12 substr. MG1655]	-0.686334	0.427798	0.033598	-0.102999	-0.330418	-0.54897	-0.891273	-0.857246	-0.601625	-0.705885	-0.830303	-0.871243	-0.93913	-0.913498	-0.951961	0	0.64687	0.576108	0.489295	0.49714	0.232498	0.176382	0.116071	0.247561	0.202935	0.107176	0.0936	0.053266	0.064396	0.039516
>gi|16128109|ref|NP_414658.1| lipoamide dehydrogenase, E3 component is part of three enzyme complexes [Escherichia coli str. K-12 substr. MG1655]	-0.996246	-0.979256	-0.980529	-0.947701	-0.979969	-0.981432	-0.99723	-0.993867	-0.468371	-0.619364	-0.802467	-0.771621	-0.877524	-0.866513	-0.903588	0	0.029628	0.021349	0.107966	0.057498	0.018404	0.004403	0.007109	0.263327	0.19409	0.127104	0.148788	0.070354	0.099816	0.082476
>gi|16128110|ref|NP_414659.1| predicted protein [Escherichia coli str. K-12 substr. MG1655]	0.846074	-0.799761	-0.844249	-0.854891	-0.83349	-0.845214	-0.931058	-0.961665	-0.691687	-0.854281	-0.938732	-0.956129	-0.98993	-0.9957	-0.995993	0	0.270532	0.200248	0.15508	0.198952	0.147643	0.072918	0.042774	0.432849	0.169078	0.100053	0.106213	0.017944	0.00509	0.007999
>gi|16128111|ref|NP_414660.1| bifunctional aconitate hydratase 2/2-methylisocitrate dehydratase [Escherichia coli str. K-12 substr. MG1655]	-0.838011	-0.315868	-0.597924	-0.504492	-0.730405	-0.739383	-0.908791	-0.947585	-0.309576	-0.528049	-0.691397	-0.703216	-0.786928	-0.797632	-0.842244	0	0.391485	0.236073	0.17988	0.209422	0.121809	0.041062	0.022571	0.238629	0.214719	0.151298	0.117957	0.086834	0.093869	0.091451
>gi|90111086|ref|NP_414661.2| conserved protein [Escherichia coli str. K-12 substr. MG1655]	-0.826942	-0.997143	-0.955959	-0.905409	-0.952262	-0.979822	-0.999712	-0.927401	0.235791	0.407358	0.265197	0.07406	-0.342463	-0.248893	-0.135442	0	0.007783	0.122121	0.276392	0.140408	0.024267	0.000791	0.122278	0.470235	0.555679	0.454425	0.434462	0.56773	0.485659	0.634846
>gi|16128113|ref|NP_414662.1| S-adenosylmethionine decarboxylase [Escherichia coli str. K-12 substr. MG1655]	-0.730601	-0.999099	-0.999418	-0.993587	-0.993854	-0.99824	-0.9999	-0.997348	-0.628618	-0.492732	-0.742695	-0.855745	-0.895434	-0.886478	-0.971218	0	0.001491	0.000664	0.010275	0.018754	0.002317	0.000167	0.004108	0.222185	0.541917	0.256974	0.161431	0.088645	0.108946	0.030336
>gi|16128114|ref|NP_414663.1| spermidine synthase (putrescine aminopropyltransferase) [Escherichia coli str. K-12 substr. MG1655]	-0.962347	-0.999099	-0.999418	-0.993587	-0.993854	-0.99824	-0.9999	-0.997348	-0.628618	-0.492732	-0.742695	-0.855745	-0.895434	-0.886478	-0.971218	0	0.001491	0.000664	0.010275	0.018754	0.002317	0.000167	0.004108	0.222185	0.541917	0.256974	0.161431	0.088645	0.108946	0.030336
>gi|90111087|ref|NP_414664.4| conserved protein, PulS_OutS family [Escherichia coli str. K-12 substr. MG1655]	0.026218	0.211683	-0.058972	0.082427	-0.321392	0.022686	-0.615653	-0.772519	0.041401	-0.329394	-0.427817	-0.505277	-0.702322	-0.425016	-0.658995	0	0.73179	0.686785	0.598504	0.63629	0.462875	0.296394	0.280026	0.394536	0.290374	0.410395	0.358297	0.271064	0.348413	0.292904
>gi|16128116|ref|NP_414665.1| multicopper oxidase (laccase) [Escherichia coli str. K-12 substr. MG1655]	-0.77832	0.211683	-0.058972	0.082427	-0.321392	0.022686	-0.615653	-0.772519	0.041401	-0.329394	-0.427817	-0.505277	-0.702322	-0.425016	-0.658995	0	0.73179	0.686785	0.598504	0.63629	0.462875	0.296394	0.280026	0.394536	0.290374	0.410395	0.358297	0.271064	0.348413	0.292904
>gi|16128117|ref|NP_414666.1| glucose dehydrogenase [Escherichia coli str. K-12 substr. MG1655]	0.679995	-0.84044	-0.922261	-0.901095	-0.96248	-0.909104	-0.979453	-0.975355	0.612722	0.03478	-0.251169	-0.478397	-0.52513	-0.636241	-0.724313	0	0.267472	0.070492	0.102921	0.051076	0.094034	0.013992	0.012247	0.214286	0.331477	0.312752	0.190038	0.100415	0.108166	0.119512
>gi|90111088|ref|NP_414667.4| hypoxanthine phosphoribosyltransferase [Escherichia coli str. K-12 substr. MG1655]	-0.998673	-0.99309	-0.964924	-0.906889	-0.954279	-0.93493	-0.993308	-0.967727	-0.184339	-0.281468	-0.556891	-0.5666	-0.584434	-0.606397	-0.734105	0	0.009385	0.052677	0.123122	0.1129	0.063452	0.011501	0.05797	0.394467	0.487919	0.342275	0.34103	0.174994	0.142148	0.306806
>gi|16128119|ref|NP_414668.1| carbonic anhydrase [Escherichia coli str. K-12 substr. MG1655]	-0.939923	-0.999994	-0.999981	-0.997791	-0.999704	-0.999913	-0.999997	-0.999864	-0.785722	-0.783518	-0.837227	-0.898942	-0.959969	-0.972996	-0.952597	0	8e-06	3.3e-05	0.006931	0.000929	0.000133	5e-06	0.000223	0.115098	0.142588	0.129025	0.079508	0.033695	0.02686	0.063728
>gi|16128120|ref|NP_414669.1| predicted transporter subunit: ATP-binding component of ABC superfamily [Escherichia coli str. K-12 substr. MG1655]	-0.931723	-0.982927	-0.815449	-0.850594	-0.935228	-0.834596	-0.964775	-0.959609	-0.58462	-0.808589	-0.938407	-0.945486	-0.97968	-0.955802	-0.975717	0	0.026778	0.234961	0.204729	0.097642	0.124767	0.040312	0.03909	0.188087	0.214821	0.044129	0.04297	0.01539	0.068811	0.01875
>gi|16128121|ref|NP_414670.1| predicted transporter subunit: membrane component of ABC superfamily [Escherichia coli str. K-12 substr. MG1655]	-0.950152	-0.994619	-0.999247	-0.994953	-0.999161	-0.988625	-0.999166	-0.99793	-0.195401	-0.569706	-0.718837	-0.892531	-0.937804	-0.935211	-0.962424	0	0.016955	0.001169	0.011286	0.002444	0.028254	0.002488	0.003187	0.644016	0.262203	0.2762	0.132124	0.049	0.060937	0.043264
>gi|16128122|ref|NP_414671.1| predicted PTS Enzyme IIA [Escherichia coli str. K-12 substr. MG1655]	-0.370291	-0.999998	-0.999977	-0.997959	-0.999672	-0.999926	-0.999998	-0.999838	-0.793226	-0.805825	-0.786478	-0.893382	-0.930692	-0.88957	-0.945163	0	2e-06	3.2e-05	0.006319	0.001025	0.00016	3e-06	0.000259	0.178187	0.1215	0.177762	0.071698	0.058001	0.084047	0.070412
>gi|16128123|ref|NP_414672.1| predicted polysaccharide deacetylase lipoprotein [Escherichia coli str. K-12 substr. MG1655]	-0.773841	-0.973205	-0.957369	-0.945159	-0.979877	-0.941092	-0.981192	-0.991692	-0.79482	-0.913273	-0.960269	-0.984749	-0.993838	-0.992779	-0.987907	0	0.035008	0.059155	0.044243	0.023215	0.067266	0.014018	0.006141	0.157227	0.056277	0.066304	0.01417	0.007079	0.007058	0.021108
>gi|16128124|ref|NP_414673.1| aspartate 1-decarboxylase [Escherichia coli str. K-12 substr. MG1655]	-0.955514	-0.942554	-0.979222	-0.975318	-0.974769	-0.985617	-0.996936	-0.995224	-0.723172	-0.802091	-0.913214	-0.954554	-0.975629	-0.973605	-0.987425	0	0.097691	0.020883	0.022267	0.035588	0.011992	0.003475	0.00528	0.184907	0.128458	0.055268	0.039541	0.025342	0.036565	0.014137
>gi|16128125|ref|NP_414674.1| predicted transposase [Escherichia coli str. K-12 substr. MG1655]	-0.988365	-0.996179	-0.993956	-0.928424	-0.958281	-0.993127	-0.999462	-0.988039	-0.82804	-0.851468	-0.932366	-0.961302	-0.938872	-0.935252	-0.968587	0	0.011408	0.007237	0.163747	0.117743	0.006894	0.000798	0.015371	0.195625	0.09354	0.056412	0.028488	0.055824	0.06104	0.03636
>gi|16128126|ref|NP_414675.1| pantothenate synthetase [Escherichia coli str. K-12 substr. MG1655]	-0.992699	-0.504992	-0.293447	-0.138485	-0.575004	-0.371346	-0.76658	-0.842691	-0.860169	-0.910331	-0.957265	-0.972653	-0.979325	-0.972074	-0.987957	0	0.387533	0.495912	0.363179	0.340415	0.328032	0.20673	0.099285	0.086952	0.084256	0.034065	0.034545	0.019271	0.021304	0.014764
>gi|16128127|ref|NP_414676.1| 3-methyl-2-oxobutanoate hydroxymethyltransferase [Escherichia coli str. K-12 substr. MG1655]	-0.985606	-0.850278	-0.80396	-0.778468	-0.912798	-0.899585	-0.981877	-0.956438	-0.263389	-0.424017	-0.67795	-0.656015	-0.731497	-0.800917	-0.806254	0	0.096093	0.147876	0.21826	0.10499	0.08403	0.013449	0.036869	0.311559	0.213275	0.229487	0.210636	0.11181	0.101059	0.138883
>gi|16128128|ref|NP_414677.1| predicted fimbrial-like adhesin protein [Escherichia coli str. K-12 substr. MG1655]	0.991333	-0.99006	-0.986312	-0.977577	-0.991484	-0.976747	-0.998965	-0.981434	0.919248	0.880705	0.65643	0.627066	0.328365	0.391127	0.239974	0	0.015041	0.019064	0.032443	0.017567	0.032647	0.002754	0.02272	0.051705	0.109511	0.287582	0.313928	0.357611	0.289304	0.353673
>gi|16128129|ref|NP_414678.1| predicted fimbrial-like adhesin protein [Escherichia coli str. K-12 substr. MG1655]	0.927126	-0.968222	-0.995172	-0.98933	-0.998044	-0.995876	-0.999717	-0.997629	0.549662	0.313668	-0.162594	-0.082688	-0.536084	-0.379874	-0.518781	0	0.08284	0.008087	0.013737	0.004177	0.004102	0.000501	0.003705	0.276068	0.22304	0.349154	0.354014	0.181374	0.280914	0.214337
>gi|16128130|ref|NP_414679.1| predicted fimbrial-like adhesin protein [Escherichia coli str. K-12 substr. MG1655]	0.620318	-0.703001	-0.904277	-0.751405	-0.864072	-0.791515	-0.989243	-0.961394	0.60592	0.543378	0.522181	0.163501	-0.079166	-0.008236	-0.04976	0	0.407732	0.08201	0.300639	0.235259	0.237644	0.016228	0.052339	0.371333	0.24728	0.282202	0.525854	0.465883	0.468086	0.471356
>gi|90111089|ref|NP_414680.4| predicted fimbrial-like adhesin protein [Escherichia coli str. K-12 substr. MG1655]	0.996096	-0.780494	-0.854458	-0.90587	-0.964544	-0.92043	-0.995116	-0.984	0.770149	0.481459	0.48428	0.334676	0.081449	0.106818	-0.217394	0	0.289447	0.159087	0.165194	0.037723	0.120084	0.00684	0.023016	0.169877	0.49327	0.34346	0.41193	0.329433	0.291481	0.265671
>gi|16128132|ref|NP_414681.1| predicted outer membrane usher protein [Escherichia coli str. K-12 substr. MG1655]	0.471798	-0.94877	-0.990739	-0.978208	-0.989776	-0.988398	-0.999563	-0.99009	0.6863	0.464427	-0.234631	-0.09064	-0.407707	-0.629108	-0.581639	0	0.058256	0.010629	0.033925	0.018213	0.011214	0.00058	0.014948	0.122358	0.284285	0.372379	0.400814	0.281554	0.238531	0.196307
>gi|16128133|ref|NP_414682.1| predicted periplasmic pilin chaperone [Escherichia coli str. K-12 substr. MG1655]	0.937522	-0.815115	-0.950335	-0.947412	-0.980431	-0.931533	-0.997184	-0.994168	-0.219955	-0.645112	-0.733571	-0.766346	-0.933231	-0.875831	-0.903599	0	0.236116	0.048512	0.066077	0.030677	0.080534	0.002604	0.00691	0.267266	0.216233	0.13702	0.122667	0.046215	0.10911	0.07089
>gi|16128134|ref|NP_414683.1| predicted fimbrial-like adhesin protein [Escherichia coli str. K-12 substr. MG1655]	0.779857	-0.389694	-0.423299	-0.317358	-0.761603	-0.660076	-0.943398	-0.868038	0.825778	0.79259	0.717554	0.645992	0.314084	0.467156	0.44007	0	0.514785	0.546194	0.499943	0.378529	0.230644	0.081803	0.108589	0.150967	0.150279	0.149076	0.227763	0.23197	0.219527	0.268332
>gi|16128135|ref|NP_414684.1| 2-amino-4-hydroxy-6-hydroxymethyldihyropteridine pyrophosphokinase [Escherichia coli str. K-12 substr. MG1655]	-0.628548	-0.772989	-0.633886	-0.58572	-0.828364	-0.823764	-0.967642	-0.933516	-0.522641	-0.568903	-0.680541	-0.822842	-0.890585	-0.941514	-0.931983	0	0.266994	0.362454	0.2677	0.218834	0.160784	0.026135	0.05113	0.209676	0.393274	0.301109	0.141595	0.137219	0.065014	0.07917
>gi|162135892|ref|NP_414685.4| poly(A) polymerase I [Escherichia coli str. K-12 substr. MG1655]	-0.217261	-0.772989	-0.633886	-0.58572	-0.828364	-0.823764	-0.967642	-0.933516	-0.522641	-0.568903	-0.680541	-0.822842	-0.890585	-0.941514	-0.931983	0	0.266994	0.362454	0.2677	0.218834	0.160784	0.026135	0.05113	0.209676	0.393274	0.301109	0.141595	0.137219	0.065014	0.07917
>gi|226524698|ref|NP_414686.3| glutamyl-Q tRNA(Asp) synthetase [Escherichia coli str. K-12 substr. MG1655]	-0.996042	-0.772989	-0.633886	-0.58572	-0.828364	-0.823764	-0.967642	-0.933516	-0.522641	-0.568903	-0.680541	-0.822842	-0.890585	-0.941514	-0.931983	0	0.266994	0.362454	0.2677	0.218834	0.160784	0.026135	0.05113	0.209676	0.393274	0.301109	0.141595	0.137219	0.065014	0.07917
>gi|16128138|ref|NP_414687.1| DNA-binding transcriptional regulator of rRNA transcription, DnaK suppressor protein [Escherichia coli str. K-12 substr. MG1655]	-0.676445	-0.876248	-0.766931	-0.762473	-0.919416	-0.876294	-0.975131	-0.925613	-0.897458	-0.942112	-0.949057	-0.956087	-0.950604	-0.945883	-0.963461	0	0.224571	0.310041	0.240872	0.197681	0.101652	0.059482	0.117793	0.088789	0.056317	0.054445	0.026722	0.052459	0.047217	0.044526
>gi|16128139|ref|NP_414688.1| predicted DNA-binding transcriptional regulator [Escherichia coli str. K-12 substr. MG1655]	-0.075749	-0.956561	-0.974838	-0.970928	-0.989413	-0.981407	-0.996877	-0.991146	-0.580602	-0.757678	-0.805966	-0.865484	-0.947079	-0.917175	-0.941088	0	0.041821	0.018325	0.026655	0.008636	0.014173	0.002467	0.009992	0.228365	0.1082	0.133488	0.085618	0.025879	0.02871	0.050893
>gi|90111091|ref|NP_414689.4| 2'-5' RNA ligase [Escherichia coli str. K-12 substr. MG1655]	-0.597362	-0.999833	-0.998807	-0.995657	-0.99926	-0.998278	-0.999506	-0.999148	-0.52334	-0.829345	-0.791183	-0.964686	-0.950584	-0.96481	-0.952389	0	0.00034	0.003055	0.010631	0.001916	0.002879	0.001235	0.00103	0.334612	0.197196	0.358663	0.052697	0.076135	0.058904	0.058903
>gi|162135893|ref|NP_414690.4| predicted ATP-dependent helicase [Escherichia coli str. K-12 substr. MG1655]	-0.699922	-0.997685	-0.93386	-0.890836	-0.975666	-0.953038	-0.997119	-0.980392	-0.762404	-0.873855	-0.821424	-0.943883	-0.977704	-0.977052	-0.966806	0	0.003462	0.104216	0.159402	0.063998	0.047639	0.003043	0.015095	0.112017	0.086991	0.276769	0.062617	0.021661	0.03031	0.035637
>gi|16128142|ref|NP_414691.1| fused glycosyl transferase and transpeptidase [Escherichia coli str. K-12 substr. MG1655]	0.760232	-0.922573	-0.771789	-0.800579	-0.833344	-0.721614	-0.94218	-0.946532	-0.342451	-0.781504	-0.943166	-0.938655	-0.981851	-0.979307	-0.971238	0	0.108559	0.242157	0.170765	0.214025	0.20763	0.065126	0.03742	0.367896	0.14877	0.071796	0.070785	0.021197	0.025756	0.030635
>gi|16128143|ref|NP_414692.1| ferrichrome outer membrane transporter [Escherichia coli str. K-12 substr. MG1655]	-0.47849	0.531586	0.178779	0.097544	-0.397334	-0.204547	-0.713927	-0.737226	0.557394	0.296547	0.004391	0.159247	-0.323708	-0.410571	-0.307081	0	0.437203	0.332274	0.41868	0.356911	0.415435	0.208334	0.149397	0.113922	0.251664	0.177075	0.350937	0.278557	0.213327	0.213236
>gi|16128144|ref|NP_414693.1| iron-hydroxamate transporter subunit [Escherichia coli str. K-12 substr. MG1655]	-0.944571	-0.999952	-0.999528	-0.991238	-0.998596	-0.999056	-0.999881	-0.998912	-0.799711	-0.832208	-0.87027	-0.926721	-0.954471	-0.961873	-0.964357	0	6.7e-05	0.000685	0.024978	0.004262	0.001512	0.000236	0.001423	0.139765	0.094103	0.077929	0.04185	0.048715	0.049239	0.034452
>gi|16128145|ref|NP_414694.1| iron-hydroxamate transporter subunit [Escherichia coli str. K-12 substr. MG1655]	-0.535035	-0.969507	-0.866291	-0.867133	-0.961785	-0.917272	-0.984794	-0.976784	-0.240222	-0.59864	-0.763214	-0.845047	-0.891628	-0.931637	-0.931903	0	0.04376	0.151389	0.126693	0.054262	0.08252	0.010522	0.017763	0.22966	0.300617	0.098414	0.113419	0.078701	0.051213	0.054135
>gi|16128146|ref|NP_414695.1| fused iron-hydroxamate transporter subunits of ABC superfamily: membrane components [Escherichia coli str. K-12 substr. MG1655]	-0.988648	-0.999994	-0.998863	-0.993193	-0.999595	-0.996818	-0.999955	-0.999596	-0.039758	-0.632343	-0.627844	-0.862051	-0.838038	-0.918601	-0.944703	0	1.1e-05	0.002909	0.020945	0.001152	0.009204	6.3e-05	0.000535	0.473676	0.353827	0.282303	0.116614	0.257086	0.127128	0.057124
>gi|16128147|ref|NP_414696.1| glutamate-1-semialdehyde aminotransferase (aminomutase) [Escherichia coli str. K-12 substr. MG1655]	-0.970959	-0.999994	-0.998863	-0.993193	-0.999595	-0.996818	-0.999955	-0.999596	-0.039758	-0.632343	-0.627844	-0.862051	-0.838038	-0.918601	-0.944703	0	1.1e-05	0.002909	0.020945	0.001152	0.009204	6.3e-05	0.000535	0.473676	0.353827	0.282303	0.116614	0.257086	0.127128	0.057124
>gi|16128148|ref|NP_414697.1| chloride channel, voltage-gated [Escherichia coli str. K-12 substr. MG1655]	-0.952559	-0.999588	-0.995504	-0.989131	-0.997559	-0.986265	-0.999754	-0.997326	-0.147844	-0.748566	-0.668165	-0.897921	-0.901774	-0.937541	-0.932741	0	0.000911	0.005951	0.015305	0.005684	0.03095	0.000262	0.003435	0.436719	0.145469	0.35194	0.085371	0.14397	0.062061	0.054329
>gi|16128149|ref|NP_414698.1| iron-sulfur cluster insertion protein [Escherichia coli str. K-12 substr. MG1655]	0.49132	-0.989019	-0.982822	-0.929001	-0.992176	-0.957958	-0.998888	-0.974262	0.926145	0.947313	0.936932	0.935803	0.86282	0.905038	0.925582	0	0.015283	0.026406	0.102769	0.017858	0.064798	0.002122	0.038451	0.055103	0.081533	0.055564	0.058618	0.091258	0.070181	0.064844
>gi|16128150|ref|NP_414699.1| inner membrane protein, UPF0126 family [Escherichia coli str. K-12 substr. MG1655]	-0.995891	-0.999326	-0.977214	-0.976757	-0.99468	-0.920679	-0.99961	-0.992456	0.240279	-0.401926	-0.580433	-0.735263	-0.808959	-0.897553	-0.900539	0	0.001831	0.050069	0.053465	0.015427	0.194151	0.000418	0.008031	0.576718	0.234803	0.41901	0.226921	0.157342	0.11402	0.100865
>gi|16128151|ref|NP_414700.1| vitamin B12 transporter subunit: periplasmic-binding component of ABC superfamily [Escherichia coli str. K-12 substr. MG1655]	-0.647792	-0.997241	-0.982932	-0.96346	-0.991293	-0.942227	-0.961647	-0.993528	-0.511549	-0.688671	-0.863173	-0.932721	-0.941532	-0.941439	-0.942254	0	0.003004	0.020081	0.067908	0.020314	0.073933	0.106233	0.006561	0.447367	0.355225	0.191953	0.113822	0.1164	0.15392	0.078496
>gi|16128152|ref|NP_414701.1| 5'-methylthioadenosine/S-adenosylhomocysteine nucleosidase [Escherichia coli str. K-12 substr. MG1655]	-0.999669	-0.998058	-0.99603	-0.983666	-0.995235	-0.995919	-0.99963	-0.997717	-0.697437	-0.763552	-0.859983	-0.877862	-0.934441	-0.920838	-0.937751	0	0.002318	0.005825	0.032505	0.014047	0.003818	0.0007	0.00346	0.188421	0.182969	0.084617	0.076412	0.036699	0.043555	0.063459
>gi|16128153|ref|NP_414702.1| deoxyguanosine triphosphate triphosphohydrolase [Escherichia coli str. K-12 substr. MG1655]	-0.885221	-0.999802	-0.99822	-0.988607	-0.998482	-0.997457	-0.99959	-0.997277	-0.923647	-0.954284	-0.979733	-0.988363	-0.990315	-0.991924	-0.994734	0	0.000161	0.002268	0.030125	0.004427	0.002213	0.000575	0.003612	0.071204	0.036202	0.020013	0.010722	0.012326	0.009468	0.005748
>gi|16128154|ref|NP_414703.1| serine endoprotease (protease Do), membrane-associated [Escherichia coli str. K-12 substr. MG1655]	0.669661	-0.999802	-0.99822	-0.988607	-0.998482	-0.997457	-0.99959	-0.997277	-0.923647	-0.954284	-0.979733	-0.988363	-0.990315	-0.991924	-0.994734	0	0.000161	0.002268	0.030125	0.004427	0.002213	0.000575	0.003612	0.071204	0.036202	0.020013	0.010722	0.012326	0.009468	0.005748
>gi|90111093|ref|NP_414704.4| DNA-binding transcriptional regulator for gar and gud operons; carbohydrate diacid regulator [Escherichia coli str. K-12 substr. MG1655]	-0.800393	-0.980971	-0.752731	-0.808553	-0.934744	-0.864703	-0.987764	-0.950614	-0.626502	-0.803039	-0.874895	-0.941005	-0.964879	-0.953859	-0.966912	0	0.022513	0.295326	0.2164	0.100955	0.149993	0.013417	0.039675	0.145448	0.103675	0.085288	0.046576	0.027905	0.05171	0.033629
>gi|16128156|ref|NP_414705.1| conserved protein, UPF0325 family [Escherichia coli str. K-12 substr. MG1655]	-0.613267	-0.770049	-0.747988	-0.572563	-0.678547	-0.486658	-0.85252	-0.832244	-0.957734	-0.984313	-0.986709	-0.989841	-0.991435	-0.985091	-0.994928	0	0.197923	0.262764	0.376594	0.462042	0.402637	0.173063	0.157296	0.036098	0.021068	0.018142	0.007579	0.009017	0.020033	0.005116
>gi|90111094|ref|NP_414706.2| phosphodiesterase with model substrate bis-pNPP [Escherichia coli str. K-12 substr. MG1655]	-0.444048	-0.998805	-0.998782	-0.993375	-0.998781	-0.995936	-0.999216	-0.998385	-0.558093	-0.721101	-0.737361	-0.845115	-0.886341	-0.886338	-0.915123	0	0.002641	0.001506	0.009167	0.003328	0.005189	0.001123	0.00244	0.261921	0.178329	0.126867	0.112955	0.079137	0.055746	0.041122
>gi|16128159|ref|NP_414708.1| 2,3,4,5-tetrahydropyridine-2-carboxylate N-succinyltransferase [Escherichia coli str. K-12 substr. MG1655]	0.167886	-0.813856	-0.724209	-0.792115	-0.848429	-0.781037	-0.903419	-0.912785	-0.068896	-0.429072	-0.722907	-0.641645	-0.86383	-0.842303	-0.868427	0	0.17299	0.252593	0.126605	0.13809	0.137549	0.127839	0.073586	0.42422	0.267944	0.158124	0.201311	0.076668	0.08183	0.064024
>gi|16128160|ref|NP_414709.1| uridylyltransferase [Escherichia coli str. K-12 substr. MG1655]	-0.996623	-0.999506	-0.995147	-0.981784	-0.99746	-0.996576	-0.999149	-0.997427	-0.898774	-0.902853	-0.94433	-0.985196	-0.989918	-0.989401	-0.987729	0	0.000695	0.009128	0.040287	0.006001	0.002954	0.001305	0.003258	0.070627	0.06702	0.062365	0.013742	0.01049	0.01462	0.013563
>gi|16128161|ref|NP_414710.1| methionine aminopeptidase [Escherichia coli str. K-12 substr. MG1655]	-0.944415	-0.999641	-0.998388	-0.993207	-0.993547	-0.996985	-0.999703	-0.997185	-0.403271	-0.375567	-0.571043	-0.740706	-0.759924	-0.736076	-0.902697	0	0.000745	0.002113	0.011828	0.020119	0.003351	0.000425	0.004431	0.263801	0.228862	0.347393	0.205924	0.146041	0.092322	0.093718
>gi|16128162|ref|NP_414711.1| 30S ribosomal subunit protein S2 [Escherichia coli str. K-12 substr. MG1655]	-0.742923	-0.053498	-0.372513	-0.406803	-0.40426	-0.753286	-0.909313	-0.962619	-0.790294	-0.870901	-0.926671	-0.962989	-0.980469	-0.967728	-0.981169	0	0.490415	0.345624	0.241122	0.372314	0.111308	0.061107	0.026638	0.162927	0.102836	0.057113	0.022964	0.018346	0.023772	0.021105
>gi|16128163|ref|NP_414712.1| protein chain elongation factor EF-Ts [Escherichia coli str. K-12 substr. MG1655]	-0.953037	0.13697	-0.030476	-0.199189	-0.393141	-0.620979	-0.918042	-0.883651	-0.656768	-0.631085	-0.709649	-0.869999	-0.910083	-0.88587	-0.935289	0	0.602607	0.579402	0.510404	0.364189	0.22841	0.133344	0.121962	0.217584	0.357413	0.214322	0.102786	0.062413	0.077864	0.073307
>gi|16128164|ref|NP_414713.1| uridylate kinase [Escherichia coli str. K-12 substr. MG1655]	-0.988353	-0.643638	-0.500748	-0.672404	-0.805239	-0.719326	-0.968217	-0.932914	0.003323	-0.486484	-0.57855	-0.700886	-0.817845	-0.843225	-0.84865	0	0.279516	0.403329	0.232041	0.235953	0.207814	0.029684	0.055145	0.316203	0.265159	0.218516	0.140327	0.111609	0.092962	0.106432
>gi|16128165|ref|NP_414714.1| ribosome recycling factor [Escherichia coli str. K-12 substr. MG1655]	-0.632064	0.864078	0.818529	0.752525	0.534422	0.665238	-0.172533	-0.408103	-0.905606	-0.954149	-0.978654	-0.98782	-0.991306	-0.985887	-0.99356	0	0.168286	0.179599	0.152159	0.296573	0.146545	0.525843	0.281282	0.076355	0.05944	0.020197	0.016367	0.010436	0.014349	0.01026
>gi|16128166|ref|NP_414715.1| 1-deoxy-D-xylulose 5-phosphate reductoisomerase [Escherichia coli str. K-12 substr. MG1655]	0.488552	-0.926776	-0.836043	-0.829849	-0.956459	-0.903154	-0.984093	-0.965272	-0.745031	-0.801577	-0.89049	-0.933634	-0.959769	-0.935728	-0.967638	0	0.124643	0.191564	0.161315	0.085894	0.062212	0.022831	0.028647	0.179163	0.163261	0.077427	0.063443	0.030893	0.057955	0.035695
>gi|16128167|ref|NP_414716.1| undecaprenyl pyrophosphate synthase [Escherichia coli str. K-12 substr. MG1655]	-0.2692	-0.988502	-0.980247	-0.971536	-0.988873	-0.991493	-0.997209	-0.996691	-0.766503	-0.858901	-0.942125	-0.961255	-0.985474	-0.984964	-0.962998	0	0.012314	0.018566	0.047742	0.008882	0.006495	0.002597	0.003428	0.111753	0.087746	0.053833	0.021367	0.010592	0.009459	0.051044
>gi|90111095|ref|NP_414717.2| CDP-diglyceride synthase [Escherichia coli str. K-12 substr. MG1655]	-0.999727	-0.999999	-0.999986	-0.993374	-0.999909	-0.999101	-0.999989	-0.999906	-0.272486	-0.450845	-0.633226	-0.743875	-0.86725	-0.915008	-0.938515	0	2e-06	2.5e-05	0.020922	0.000284	0.00265	2.5e-05	0.000139	0.550417	0.354895	0.28775	0.356184	0.135671	0.111852	0.062235
>gi|16128169|ref|NP_414718.1| inner membrane zinc RIP metalloprotease; RpoE activator, by degrading RseA [Escherichia coli str. K-12 substr. MG1655]	-0.892796	-0.988023	-0.979273	-0.95229	-0.991061	-0.946079	-0.995242	-0.993398	-0.426557	-0.693961	-0.74443	-0.864523	-0.952941	-0.949302	-0.934129	0	0.014229	0.023307	0.070631	0.022133	0.078252	0.005783	0.006172	0.297817	0.1585	0.274853	0.105801	0.036902	0.053107	0.057713
>gi|16128170|ref|NP_414719.1| outer membrane protein assembly factor, forms pores; required for OM biogenesis; in BamABCD OM protein complex [Escherichia coli str. K-12 substr. MG1655]	-0.457562	-0.138579	-0.515904	-0.486646	-0.742491	-0.607829	-0.911763	-0.83192	0.742664	0.555752	0.284733	0.369572	-0.109394	-0.110899	-0.161198	0	0.330822	0.380483	0.38171	0.313783	0.28881	0.08699	0.140831	0.094114	0.205011	0.194674	0.270467	0.182807	0.266445	0.135207
>gi|16128171|ref|NP_414720.1| periplasmic chaperone [Escherichia coli str. K-12 substr. MG1655]	0.808515	-0.470512	-0.15139	-0.299695	-0.532984	-0.025863	-0.85111	-0.787742	-0.599351	-0.856451	-0.933205	-0.965691	-0.995434	-0.994193	-0.995875	0	0.636498	0.751211	0.563831	0.624589	0.662942	0.187895	0.313609	0.497931	0.180899	0.174421	0.057321	0.005475	0.007057	0.006326
>gi|16128172|ref|NP_414721.1| UDP-3-O-(3-hydroxymyristoyl)-glucosamine N-acyltransferase [Escherichia coli str. K-12 substr. MG1655]	-0.028296	-0.470512	-0.15139	-0.299695	-0.532984	-0.025863	-0.85111	-0.787742	-0.599351	-0.856451	-0.933205	-0.965691	-0.995434	-0.994193	-0.995875	0	0.636498	0.751211	0.563831	0.624589	0.662942	0.187895	0.313609	0.497931	0.180899	0.174421	0.057321	0.005475	0.007057	0.006326
>gi|16128173|ref|NP_414722.1| (3R)-hydroxymyristol acyl carrier protein dehydratase [Escherichia coli str. K-12 substr. MG1655]	-0.986111	-0.470512	-0.15139	-0.299695	-0.532984	-0.025863	-0.85111	-0.787742	-0.599351	-0.856451	-0.933205	-0.965691	-0.995434	-0.994193	-0.995875	0	0.636498	0.751211	0.563831	0.624589	0.662942	0.187895	0.313609	0.497931	0.180899	0.174421	0.057321	0.005475	0.007057	0.006326
>gi|16128174|ref|NP_414723.1| UDP-N-acetylglucosamine acetyltransferase [Escherichia coli str. K-12 substr. MG1655]	-0.973596	-0.999668	-0.999596	-0.998138	-0.999174	-0.999334	-0.99994	-0.999362	-0.695548	-0.783513	-0.888001	-0.892033	-0.960295	-0.945152	-0.968026	0	0.000756	0.000448	0.003058	0.002488	0.000586	9.6e-05	0.000953	0.334035	0.117551	0.081178	0.059744	0.026864	0.045213	0.032868
>gi|16128175|ref|NP_414724.1| tetraacyldisaccharide-1-P synthase [Escherichia coli str. K-12 substr. MG1655]	-0.992108	-0.991809	-0.968826	-0.913198	-0.976876	-0.949236	-0.993133	-0.983916	-0.919089	-0.948655	-0.967889	-0.986118	-0.987154	-0.982743	-0.99269	0	0.010894	0.038809	0.117384	0.062834	0.069363	0.007919	0.015444	0.087138	0.044398	0.029649	0.016914	0.010186	0.021111	0.008488
>gi|16128176|ref|NP_414725.1| ribonuclease HII, degrades RNA of DNA-RNA hybrids [Escherichia coli str. K-12 substr. MG1655]	-0.990973	-0.999118	-0.998479	-0.974388	-0.994711	-0.996928	-0.999459	-0.998379	-0.967342	-0.946681	-0.977148	-0.993378	-0.994911	-0.987203	-0.997169	0	0.001513	0.002159	0.072228	0.015891	0.005231	0.001022	0.001965	0.035617	0.051758	0.021203	0.006427	0.005578	0.025749	0.003078
>gi|16128177|ref|NP_414726.1| DNA polymerase III alpha subunit [Escherichia coli str. K-12 substr. MG1655]	-0.978329	-0.874015	-0.757438	-0.592061	-0.905782	-0.784858	-0.932766	-0.943997	-0.673593	-0.753559	-0.869646	-0.879186	-0.889328	-0.867946	-0.924596	0	0.179462	0.161295	0.312613	0.186497	0.15793	0.056909	0.039634	0.154125	0.161437	0.076865	0.085008	0.051326	0.055632	0.060922
>gi|16128178|ref|NP_414727.1| acetyl-CoA carboxylase, carboxytransferase, alpha subunit [Escherichia coli str. K-12 substr. MG1655]	-0.912988	-0.851123	-0.838086	-0.633537	-0.894234	-0.830535	-0.961917	-0.955191	-0.842445	-0.917146	-0.960812	-0.959109	-0.975489	-0.970149	-0.98533	0	0.218287	0.179381	0.285334	0.222267	0.145836	0.054418	0.051876	0.098105	0.064865	0.032312	0.036254	0.015924	0.023618	0.013771
>gi|16128179|ref|NP_414728.1| lysine decarboxylase 2, constitutive [Escherichia coli str. K-12 substr. MG1655]	-0.900109	-0.986191	-0.97736	-0.952033	-0.97845	-0.982711	-0.996633	-0.989782	-0.1702	-0.341617	-0.587269	-0.654796	-0.75791	-0.739678	-0.833654	0	0.015507	0.022269	0.057843	0.041808	0.014272	0.002676	0.008705	0.282855	0.199827	0.169368	0.11096	0.089101	0.101039	0.090573
>gi|90111096|ref|NP_414729.4| predicted lyase [Escherichia coli str. K-12 substr. MG1655]	-0.876641	-0.99732	-0.998033	-0.984586	-0.996858	-0.99287	-0.999284	-0.994602	-0.809477	-0.718483	-0.94937	-0.974098	-0.972138	-0.963548	-0.983391	0	0.003974	0.003033	0.023251	0.007024	0.009662	0.001234	0.01061	0.194703	0.556887	0.041624	0.023652	0.023242	0.029347	0.016603
>gi|16128181|ref|NP_414730.1| tRNA(Ile)-lysidine synthetase [Escherichia coli str. K-12 substr. MG1655]	-0.72322	-0.99732	-0.998033	-0.984586	-0.996858	-0.99287	-0.999284	-0.994602	-0.809477	-0.718483	-0.94937	-0.974098	-0.972138	-0.963548	-0.983391	0	0.003974	0.003033	0.023251	0.007024	0.009662	0.001234	0.01061	0.194703	0.556887	0.041624	0.023652	0.023242	0.029347	0.016603
>gi|90111097|ref|NP_414731.2| modulator of Rho-dependent transcription termination [Escherichia coli str. K-12 substr. MG1655]	0.047157	-0.998205	-0.990726	-0.973626	-0.983992	-0.993414	-0.999593	-0.992384	-0.179834	-0.257747	-0.447678	-0.780384	-0.754489	-0.655045	-0.904874	0	0.001807	0.018692	0.055205	0.046743	0.006692	0.000498	0.011216	0.581507	0.436208	0.448308	0.144428	0.14375	0.32701	0.099233
>gi|49176004|ref|YP_026160.1| conserved protein [Escherichia coli str. K-12 substr. MG1655]	0.212498	-0.868734	-0.708255	-0.666077	-0.909422	-0.656555	-0.993361	-0.891245	-0.409637	-0.653864	-0.779312	-0.82043	-0.869988	-0.845028	-0.897421	0	0.177685	0.580446	0.534499	0.155104	0.251809	0.010867	0.202785	0.484292	0.444288	0.248471	0.188361	0.11865	0.171493	0.114259
>gi|16128183|ref|NP_414732.1| conserved protein [Escherichia coli str. K-12 substr. MG1655]	-0.87688	-0.903388	-0.748359	-0.852354	-0.853408	-0.865401	-0.924936	-0.95543	-0.234346	-0.662217	-0.803296	-0.886726	-0.972078	-0.965205	-0.951358	0	0.097101	0.295026	0.158377	0.325455	0.121795	0.100793	0.041671	0.32021	0.323187	0.203952	0.142214	0.017286	0.039362	0.055454
>gi|16128184|ref|NP_414733.1| conserved protein [Escherichia coli str. K-12 substr. MG1655]	-0.858066	-0.998848	-0.996966	-0.988592	-0.994986	-0.995549	-0.9997	-0.997412	-0.882462	-0.85913	-0.973092	-0.995762	-0.990955	-0.986751	-0.998007	0	0.001571	0.003142	0.022901	0.010541	0.005548	0.00038	0.004384	0.183684	0.342464	0.049149	0.006597	0.021486	0.035229	0.002701
>gi|16128185|ref|NP_414734.1| lipoprotein involved with copper homeostasis and adhesion [Escherichia coli str. K-12 substr. MG1655]	0.369025	-0.13672	-0.350903	-0.381824	-0.590671	-0.687204	-0.888759	-0.871342	0.788443	0.743127	0.465978	0.546122	0.444748	0.578608	0.541177	0	0.665279	0.468705	0.295358	0.359761	0.214664	0.099421	0.100337	0.123032	0.154032	0.507173	0.382037	0.244847	0.154604	0.309091
>gi|90111098|ref|NP_414735.4| predicted lipoprotein [Escherichia coli str. K-12 substr. MG1655]	0.212975	-0.980109	-0.992914	-0.984198	-0.996948	-0.992424	-0.999398	-0.998428	-0.664009	-0.789199	-0.860345	-0.890235	-0.970908	-0.920852	-0.950708	0	0.029519	0.00624	0.017545	0.003688	0.007092	0.000562	0.001935	0.251705	0.116293	0.107153	0.076976	0.028101	0.060459	0.043709
>gi|16128187|ref|NP_414736.1| prolyl-tRNA synthetase [Escherichia coli str. K-12 substr. MG1655]	-0.430873	0.12723	0.29985	0.099772	-0.039874	-0.296797	-0.576645	-0.751044	-0.532082	-0.719935	-0.850007	-0.853414	-0.91549	-0.909963	-0.948894	0	0.467952	0.19049	0.201407	0.207416	0.145943	0.17383	0.102896	0.220476	0.149318	0.09926	0.068502	0.043749	0.042317	0.033563
>gi|16128188|ref|NP_414737.1| conserved protein, UPF0066 family [Escherichia coli str. K-12 substr. MG1655]	0.195785	-0.959304	-0.945643	-0.900097	-0.976405	-0.915891	-0.975502	-0.970513	-0.669783	-0.866092	-0.915263	-0.957193	-0.983022	-0.977333	-0.974909	0	0.053177	0.053927	0.104813	0.034025	0.070888	0.017915	0.021697	0.171421	0.068261	0.090517	0.03232	0.023454	0.022225	0.022379
>gi|16128189|ref|NP_414738.1| predicted outer membrane protein, signal [Escherichia coli str. K-12 substr. MG1655]	-0.108123	-0.998312	-0.995449	-0.984539	-0.995706	-0.988758	-0.998828	-0.995565	-0.708573	-0.827875	-0.890126	-0.928801	-0.954041	-0.956407	-0.986353	0	0.003512	0.006422	0.031008	0.008189	0.016212	0.002357	0.007028	0.217183	0.185339	0.107352	0.069948	0.036119	0.036628	0.015525
>gi|16128190|ref|NP_414739.1| DL-methionine transporter subunit [Escherichia coli str. K-12 substr. MG1655]	-0.868808	0.469807	0.578575	0.261135	0.111742	0.165538	-0.162521	-0.364977	-0.649497	-0.813687	-0.888254	-0.90582	-0.96951	-0.95687	-0.956621	0	0.580179	0.396802	0.311067	0.561191	0.469541	0.505027	0.303614	0.288058	0.175673	0.122322	0.07247	0.020542	0.029132	0.025075
>gi|16128191|ref|NP_414740.1| DL-methionine transporter subunit [Escherichia coli str. K-12 substr. MG1655]	-0.668027	-0.922055	-0.939954	-0.974523	-0.983669	-0.877301	-0.998576	-0.972595	0.254491	-0.404761	-0.547434	-0.836696	-0.822871	-0.84403	-0.930478	0	0.24306	0.108682	0.034599	0.042559	0.244091	0.001683	0.02196	0.519659	0.554922	0.565178	0.108711	0.277225	0.293662	0.074505
>gi|16128192|ref|NP_414741.1| DL-methionine transporter subunit [Escherichia coli str. K-12 substr. MG1655]	-0.920465	-0.966238	-0.967911	-0.96229	-0.98759	-0.97558	-0.994876	-0.993196	-0.608766	-0.759531	-0.837968	-0.901977	-0.950746	-0.929301	-0.957942	0	0.0709	0.042915	0.044028	0.020528	0.02136	0.005415	0.006132	0.208779	0.111797	0.084506	0.073823	0.033783	0.035745	0.038661
>gi|16128193|ref|NP_414742.1| D,D-heptose 1,7-bisphosphate phosphatase [Escherichia coli str. K-12 substr. MG1655]	-0.961892	-0.926103	-0.862431	-0.791497	-0.953986	-0.917295	-0.980337	-0.977175	-0.769545	-0.812539	-0.92411	-0.939162	-0.963481	-0.941618	-0.974412	0	0.093785	0.169546	0.229875	0.097302	0.065232	0.023478	0.020839	0.134227	0.163678	0.070011	0.060905	0.028477	0.039817	0.030124
>gi|16128194|ref|NP_414743.1| 2,5-diketo-D-gluconate reductase B [Escherichia coli str. K-12 substr. MG1655]	-0.835998	-0.639559	-0.644488	-0.810985	-0.839003	-0.915333	-0.969178	-0.977655	-0.563619	-0.743667	-0.679547	-0.772143	-0.956868	-0.970028	-0.956896	0	0.311591	0.42193	0.174834	0.169846	0.052323	0.025999	0.017016	0.267618	0.111448	0.436914	0.417474	0.03519	0.017514	0.036969
>gi|16128195|ref|NP_414744.1| predicted DNA-binding transcriptional regulator [Escherichia coli str. K-12 substr. MG1655]	-0.577984	-0.933593	-0.917133	-0.930017	-0.966177	-0.952367	-0.99255	-0.981895	-0.604519	-0.816157	-0.840593	-0.896681	-0.961563	-0.922227	-0.96745	0	0.056568	0.094144	0.071901	0.041648	0.03142	0.005847	0.030112	0.197174	0.125431	0.09892	0.085783	0.026445	0.062355	0.035522
>gi|16128196|ref|NP_414745.1| conserved protein [Escherichia coli str. K-12 substr. MG1655]	0.428751	-0.993288	-0.980707	-0.952414	-0.988384	-0.958342	-0.991508	-0.987656	-0.847829	-0.945718	-0.971403	-0.988432	-0.994755	-0.990486	-0.990503	0	0.010225	0.026477	0.064214	0.016871	0.041345	0.007498	0.008801	0.152115	0.041482	0.036956	0.012445	0.005725	0.017293	0.013892
>gi|16128197|ref|NP_414746.1| predicted S-adenosyl-L-methionine-dependent methyltransferase [Escherichia coli str. K-12 substr. MG1655]	-0.214607	-0.842477	-0.88021	-0.8881	-0.864141	-0.965465	-0.984917	-0.988466	-0.635693	-0.758029	-0.878442	-0.946419	-0.980686	-0.985069	-0.969285	0	0.208644	0.111063	0.094921	0.146083	0.023465	0.01184	0.010588	0.364293	0.19471	0.103441	0.04539	0.018965	0.013565	0.041319
>gi|16128198|ref|NP_414747.1| predicted membrane-bound lytic murein transglycosylase D [Escherichia coli str. K-12 substr. MG1655]	0.582364	-0.987965	-0.967332	-0.959615	-0.984002	-0.960085	-0.99508	-0.994612	-0.373643	-0.735127	-0.823195	-0.91336	-0.968041	-0.956881	-0.973238	0	0.013959	0.02663	0.071514	0.024662	0.038699	0.007925	0.00466	0.301198	0.178714	0.25643	0.067564	0.050314	0.064819	0.021799
>gi|16128199|ref|NP_414748.1| hydroxyacylglutathione hydrolase [Escherichia coli str. K-12 substr. MG1655]	-0.89785	-0.998018	-0.997433	-0.992634	-0.996545	-0.996262	-0.999608	-0.997907	-0.615478	-0.641909	-0.776761	-0.914671	-0.941989	-0.923759	-0.956487	0	0.003729	0.003944	0.013429	0.008298	0.003984	0.000444	0.003193	0.165922	0.382501	0.244413	0.053002	0.046543	0.037708	0.026378
>gi|90111099|ref|NP_414749.2| predicted S-adenosyl-L-methionine-dependent methyltransferase [Escherichia coli str. K-12 substr. MG1655]	-0.949496	-0.999966	-0.999736	-0.995605	-0.999487	-0.99883	-0.999882	-0.999373	-0.90144	-0.951209	-0.975478	-0.986686	-0.995802	-0.990494	-0.994364	0	4.4e-05	0.000395	0.012139	0.001318	0.001442	0.000195	0.00101	0.093616	0.050718	0.035533	0.014991	0.005174	0.015817	0.005682
>gi|16128201|ref|NP_414750.1| ribonuclease HI, degrades RNA of DNA-RNA hybrids [Escherichia coli str. K-12 substr. MG1655]	-0.450193	-0.999817	-0.99921	-0.991923	-0.998675	-0.998499	-0.999759	-0.998731	-0.509287	-0.800773	-0.88013	-0.916214	-0.97356	-0.96935	-0.953285	0	0.000422	0.000958	0.024568	0.003189	0.001815	0.000367	0.001283	0.361083	0.149663	0.098775	0.052815	0.018084	0.018986	0.034438
>gi|16128202|ref|NP_414751.1| DNA polymerase III epsilon subunit [Escherichia coli str. K-12 substr. MG1655]	-0.992256	-0.574679	-0.351085	-0.40459	-0.513048	-0.774037	-0.895593	-0.926108	-0.814607	-0.848346	-0.922813	-0.955574	-0.964363	-0.94938	-0.973381	0	0.155878	0.353411	0.275917	0.383483	0.117809	0.070448	0.043827	0.168394	0.093816	0.069867	0.047335	0.037695	0.037619	0.03233
>gi|16128203|ref|NP_414752.1| lipoprotein [Escherichia coli str. K-12 substr. MG1655]	0.524372	0.813833	0.67444	0.514333	0.507053	0.320583	-0.047714	-0.324723	-0.177357	-0.532213	-0.779805	-0.808952	-0.895654	-0.768866	-0.897254	0	0.156814	0.163833	0.438256	0.343713	0.39006	0.462828	0.483171	0.235785	0.214429	0.209581	0.113232	0.097546	0.192365	0.110053
>gi|145698220|ref|YP_001165307.1| hypothetical protein, no homologs [Escherichia coli str. K-12 substr. MG1655]	-0.786219	-0.99727	-0.997056	-0.994053	-0.998447	-0.987187	-0.999876	-0.997525	-0.328248	-0.81236	-0.663529	-0.961103	-0.971306	-0.919404	-0.974326	0	0.006094	0.006178	0.012531	0.003249	0.031356	0.000345	0.004818	0.505224	0.204009	0.55401	0.02586	0.050082	0.08817	0.028823
>gi|16128205|ref|NP_414754.1| predicted C-N hydrolase family amidase, NAD(P)-binding [Escherichia coli str. K-12 substr. MG1655]	-0.76388	-0.99727	-0.997056	-0.994053	-0.998447	-0.987187	-0.999876	-0.997525	-0.328248	-0.81236	-0.663529	-0.961103	-0.971306	-0.919404	-0.974326	0	0.006094	0.006178	0.012531	0.003249	0.031356	0.000345	0.004818	0.505224	0.204009	0.55401	0.02586	0.050082	0.08817	0.028823
>gi|16128206|ref|NP_414755.1| inhibitor of c-type lysozyme, periplasmic [Escherichia coli str. K-12 substr. MG1655]	0.916018	-0.834199	-0.846711	-0.932842	-0.952777	-0.959572	-0.985816	-0.98618	0.789895	0.527178	0.254554	0.391023	-0.043856	0.058976	-0.010956	0	0.257806	0.173014	0.077252	0.072466	0.04747	0.036114	0.017086	0.11944	0.541534	0.459586	0.272209	0.373412	0.508348	0.44412
>gi|90111100|ref|NP_414756.2| acyl coenzyme A dehydrogenase [Escherichia coli str. K-12 substr. MG1655]	-0.937855	-0.998835	-0.997466	-0.987226	-0.996563	-0.993245	-0.999106	-0.998005	-0.705893	-0.851604	-0.893308	-0.942377	-0.972164	-0.964366	-0.963313	0	0.001489	0.002373	0.02518	0.008947	0.008654	0.000916	0.002038	0.177091	0.077205	0.070124	0.039388	0.026647	0.042846	0.032046
>gi|16128208|ref|NP_414757.1| D-sedoheptulose 7-phosphate isomerase [Escherichia coli str. K-12 substr. MG1655]	-0.999808	-0.995616	-0.998668	-0.990573	-0.996432	-0.99823	-0.999803	-0.998713	-0.855164	-0.881739	-0.956288	-0.966581	-0.982452	-0.976238	-0.985838	0	0.008462	0.00147	0.01056	0.01006	0.00155	0.000208	0.002137	0.133478	0.09279	0.0353	0.032044	0.017909	0.015703	0.011043
>gi|16128209|ref|NP_414758.1| predicted amidotransfease [Escherichia coli str. K-12 substr. MG1655]	0.978981	-0.998886	-0.999159	-0.996878	-0.999232	-0.994655	-0.998884	-0.997231	0.284619	-0.208834	-0.291297	-0.397566	-0.646219	-0.619746	-0.680301	0	0.001186	0.000633	0.005268	0.00169	0.008242	0.00166	0.002945	0.384144	0.240932	0.334822	0.119183	0.167737	0.144448	0.197003
>gi|16128210|ref|NP_414759.1| conserved protein [Escherichia coli str. K-12 substr. MG1655]	0.257557	-0.998105	-0.99205	-0.97718	-0.993436	-0.980258	-0.997877	-0.986509	-0.710224	-0.791558	-0.95246	-0.858156	-0.987998	-0.966839	-0.981099	0	0.00226	0.010564	0.035662	0.016544	0.021659	0.004349	0.018135	0.180325	0.221538	0.06668	0.185564	0.012632	0.035878	0.013737
>gi|16128211|ref|NP_414760.1| translation inhibitor toxin of toxin-antitoxin pair YafQ/DinJ [Escherichia coli str. K-12 substr. MG1655]	-0.999912	-0.99769	-0.993567	-0.966969	-0.987157	-0.995477	-0.997319	-0.995639	-0.95318	-0.956173	-0.994982	-0.996111	-0.996096	-0.996035	-0.997067	0	0.00346	0.008092	0.087547	0.036426	0.004916	0.005563	0.005392	0.04914	0.080605	0.006099	0.004178	0.004265	0.005185	0.005825
>gi|16128212|ref|NP_414761.1| antitoxin of YafQ-DinJ toxin-antitoxin system [Escherichia coli str. K-12 substr. MG1655]	-0.965549	0.714958	0.678713	0.834926	0.590605	0.552718	0.148856	-0.444284	-0.949167	-0.953464	-0.980358	-0.989737	-0.991754	-0.988984	-0.994159	0	0.582549	0.336912	0.14884	0.423595	0.235994	0.677051	0.497572	0.038441	0.064624	0.023598	0.013459	0.009938	0.014036	0.009862
>gi|16128213|ref|NP_414762.1| predicted lipoprotein and C40 family peptidase [Escherichia coli str. K-12 substr. MG1655]	-0.977773	-0.999932	-0.999923	-0.998433	-0.999681	-0.999794	-0.999967	-0.999793	-0.935966	-0.955463	-0.984033	-0.995425	-0.995275	-0.996742	-0.993643	0	0.000119	0.000104	0.0043	0.000854	0.000229	6.2e-05	0.000273	0.066431	0.049957	0.01947	0.004841	0.005203	0.004307	0.010257
>gi|16128214|ref|NP_414763.1| conserved protein [Escherichia coli str. K-12 substr. MG1655]	-0.820828	-0.999944	-0.999903	-0.999113	-0.999902	-0.999843	-0.999976	-0.999872	-0.800786	-0.879366	-0.971216	-0.957053	-0.994683	-0.993108	-0.991971	0	0.000149	0.000246	0.00269	0.000297	0.000339	5e-05	0.000183	0.216416	0.154881	0.034595	0.106909	0.006429	0.011871	0.009254
>gi|16128217|ref|NP_414766.1| DNA polymerase IV [Escherichia coli str. K-12 substr. MG1655]	-0.971247	-0.999469	-0.996075	-0.985746	-0.996712	-0.989816	-0.998908	-0.996972	-0.883606	-0.959399	-0.974639	-0.990426	-0.99391	-0.989307	-0.995489	0	0.000751	0.006958	0.022142	0.009108	0.013334	0.002107	0.00282	0.111782	0.041196	0.023668	0.010468	0.006238	0.01276	0.005932
>gi|16128218|ref|NP_414767.1| antitoxin of the YafO-YafN toxin-antitoxin system [Escherichia coli str. K-12 substr. MG1655]	-0.324607	0.690495	0.543173	0.817176	0.201654	0.390212	-0.124934	-0.261813	-0.935597	-0.96606	-0.981466	-0.989952	-0.98694	-0.977705	-0.992042	0	0.410433	0.707714	0.199795	0.6787	0.624836	0.632636	0.58442	0.053546	0.049259	0.02139	0.009067	0.014199	0.030522	0.010986
>gi|16128219|ref|NP_414768.1| mRNA interferase toxin of the YafO-YafN toxin-antitoxin system [Escherichia coli str. K-12 substr. MG1655]	-0.997173	-0.933784	-0.843075	-0.813379	-0.960419	-0.957199	-0.9736	-0.985799	-0.972008	-0.990077	-0.993115	-0.997763	-0.996	-0.994281	-0.997573	0	0.118831	0.300588	0.197352	0.076215	0.033091	0.036371	0.015617	0.029101	0.013395	0.009839	0.003331	0.004576	0.008854	0.004537
>gi|16128220|ref|NP_414769.1| predicted acyltransferase with acyl-CoA N-acyltransferase domain [Escherichia coli str. K-12 substr. MG1655]	-0.837055	-0.992536	-0.985684	-0.986914	-0.992373	-0.985672	-0.994989	-0.990679	-0.805634	-0.912874	-0.985944	-0.99477	-0.99621	-0.992424	-0.996342	0	0.013874	0.024082	0.017865	0.016309	0.012672	0.009201	0.011044	0.204249	0.108007	0.018089	0.007116	0.004967	0.01327	0.007383
>gi|16128223|ref|NP_414772.1| aminoacyl-histidine dipeptidase (peptidase D) [Escherichia coli str. K-12 substr. MG1655]	-0.988641	-0.992536	-0.985684	-0.986914	-0.992373	-0.985672	-0.994989	-0.990679	-0.805634	-0.912874	-0.985944	-0.99477	-0.99621	-0.992424	-0.996342	0	0.013874	0.024082	0.017865	0.016309	0.012672	0.009201	0.011044	0.204249	0.108007	0.018089	0.007116	0.004967	0.01327	0.007383
>gi|16128224|ref|NP_414773.1| guanine-hypoxanthine phosphoribosyltransferase [Escherichia coli str. K-12 substr. MG1655]	-0.862017	-0.999355	-0.991673	-0.967079	-0.985291	-0.984672	-0.996792	-0.99443	-0.344461	-0.559809	-0.817992	-0.818698	-0.932942	-0.935943	-0.950324	0	0.000855	0.012368	0.082736	0.044311	0.023262	0.006249	0.005579	0.286038	0.269279	0.130047	0.130734	0.037793	0.056532	0.042795
>gi|16128225|ref|NP_414774.1| fermentation-respiration switch protein; PTS Enzyme IIA(Glc)-binding protein; pNP-butyrate esterase activity [Escherichia coli str. K-12 substr. MG1655]	-0.703022	-0.999355	-0.991673	-0.967079	-0.985291	-0.984672	-0.996792	-0.99443	-0.344461	-0.559809	-0.817992	-0.818698	-0.932942	-0.935943	-0.950324	0	0.000855	0.012368	0.082736	0.044311	0.023262	0.006249	0.005579	0.286038	0.269279	0.130047	0.130734	0.037793	0.056532	0.042795
>gi|16128226|ref|NP_414775.1| sigma factor-binding protein, stimulates RNA polymerase holoenzyme formation [Escherichia coli str. K-12 substr. MG1655]	-0.85717	-0.936968	-0.982441	-0.945338	-0.989042	-0.95376	-0.946738	-0.983279	-0.420427	-0.729594	-0.605683	-0.749198	-0.857398	-0.7328	-0.839039	0	0.148822	0.023295	0.0822	0.026837	0.048588	0.102671	0.019297	0.441554	0.215559	0.264738	0.227627	0.091069	0.109908	0.102091
>gi|16128227|ref|NP_414776.1| outer membrane phosphoporin protein E [Escherichia coli str. K-12 substr. MG1655]	-0.057436	0.55146	0.065274	0.219264	-0.559935	-0.244788	-0.806529	-0.543583	0.728722	0.675954	0.268449	0.567659	-0.068471	0.02526	-0.082162	0	0.4238	0.444155	0.484293	0.587175	0.402953	0.222365	0.32352	0.163392	0.263828	0.595353	0.327425	0.357234	0.361033	0.495143
>gi|16128228|ref|NP_414777.1| gamma-glutamate kinase [Escherichia coli str. K-12 substr. MG1655]	-0.986956	-0.989595	-0.995694	-0.985633	-0.994508	-0.993943	-0.999243	-0.997757	-0.700103	-0.78437	-0.879493	-0.9051	-0.963514	-0.947691	-0.944665	0	0.014326	0.002926	0.021047	0.013567	0.005115	0.00062	0.002434	0.152168	0.122224	0.098112	0.055016	0.020442	0.057942	0.0595
>gi|16128229|ref|NP_414778.1| gamma-glutamylphosphate reductase [Escherichia coli str. K-12 substr. MG1655]	-0.937108	-0.801118	-0.790096	-0.792114	-0.922297	-0.817138	-0.974493	-0.957867	-0.783706	-0.837511	-0.916017	-0.940365	-0.969977	-0.961132	-0.977311	0	0.191567	0.158306	0.139301	0.098498	0.141315	0.029511	0.038566	0.118288	0.121157	0.064531	0.05944	0.018614	0.023883	0.026847
>gi|16128230|ref|NP_414779.1| CP4-6 prophage; toxin of the YkfI-YafW toxin-antitoxin system [Escherichia coli str. K-12 substr. MG1655]	-0.778712	-0.987857	-0.956184	-0.951627	-0.968628	-0.913179	-0.980981	-0.963585	-0.780078	-0.942539	-0.974838	-0.991779	-0.993209	-0.994076	-0.994759	0	0.01971	0.071437	0.045563	0.04519	0.076497	0.023561	0.046209	0.195693	0.044163	0.021125	0.010406	0.00911	0.00631	0.00723
>gi|16128231|ref|NP_414780.1| CP4-6 prophage; antitoxin of the YkfI-YafW toxin-antitoxin system [Escherichia coli str. K-12 substr. MG1655]	-0.162769	-0.999974	-0.99997	-0.998738	-0.999606	-0.999804	-0.999994	-0.999535	-0.694662	-0.484657	-0.69375	-0.824158	-0.828055	-0.823543	-0.937966	0	4.4e-05	5.5e-05	0.003167	0.001219	0.000339	1.4e-05	0.000704	0.259407	0.532588	0.298976	0.182734	0.141464	0.145499	0.079082
>gi|94541094|ref|YP_588435.1| predicted protein [Escherichia coli str. K-12 substr. MG1655]	0.504255	-0.999479	-0.999601	-0.997848	-0.999076	-0.998069	-0.999161	-0.997719	-0.866896	-0.935537	-0.968253	-0.986461	-0.975617	-0.977394	-0.989215	0	0.001317	0.00057	0.00366	0.002263	0.002975	0.001165	0.003865	0.116512	0.085263	0.039405	0.014615	0.036027	0.048489	0.022376
>gi|16128232|ref|NP_414781.1| CP4-6 prophage; predicted DNA repair protein [Escherichia coli str. K-12 substr. MG1655]	-0.996108	-0.999198	-0.997614	-0.980135	-0.998562	-0.999012	-0.999702	-0.997948	-0.938771	-0.936455	-0.967305	-0.996697	-0.99679	-0.994701	-0.997825	0	0.002293	0.006336	0.058988	0.003678	0.001473	0.000418	0.002643	0.062158	0.076108	0.059733	0.005737	0.00408	0.009038	0.003477
>gi|16128233|ref|NP_414782.1| CP4-6 prophage; predicted protein [Escherichia coli str. K-12 substr. MG1655]	-0.843073	-0.999885	-0.999946	-0.998616	-0.99947	-0.99977	-0.999995	-0.999333	-0.113726	-0.330144	-0.48923	-0.695214	-0.834686	-0.742901	-0.700327	0	0.000176	9.4e-05	0.002923	0.001598	0.000479	8e-06	0.001184	0.483842	0.3455	0.489787	0.352832	0.131132	0.241699	0.438506
>gi|16128234|ref|NP_414783.1| CP4-6 prophage; predicted protein [Escherichia coli str. K-12 substr. MG1655]	0.993747	-0.831216	-0.658059	-0.681447	-0.741854	-0.698827	-0.949922	-0.896588	0.58041	-0.038444	-0.349065	-0.399563	-0.706799	-0.760985	-0.847172	0	0.17485	0.44185	0.341595	0.531034	0.324745	0.059259	0.082543	0.255703	0.497423	0.562003	0.551557	0.506108	0.29072	0.124089
>gi|16128235|ref|NP_414784.1| CP4-6 prophage; predicted protein [Escherichia coli str. K-12 substr. MG1655]	0.222792	-0.965053	-0.993963	-0.972792	-0.994273	-0.995995	-0.999813	-0.996641	0.707207	0.76686	0.422267	0.273761	-0.136086	0.161028	-0.16067	0	0.072663	0.008525	0.045657	0.013247	0.004066	0.000336	0.005619	0.346253	0.091698	0.455379	0.269541	0.301234	0.343614	0.419106
>gi|145698221|ref|NP_414785.4| lipoprotein, inner membrane; overproduction stimulates degP expression; CP4-6 prophage [Escherichia coli str. K-12 substr. MG1655]	0.912161	-0.592242	-0.777963	-0.48545	-0.793759	-0.710771	-0.895859	-0.86875	-0.039148	-0.402975	-0.696231	-0.745011	-0.760138	-0.626757	-0.836118	0	0.461754	0.283557	0.381812	0.353432	0.250869	0.118734	0.110905	0.48259	0.358212	0.321089	0.19183	0.08912	0.355392	0.177859
>gi|90111102|ref|NP_414786.4| CP4-6 prophage; conserved protein [Escherichia coli str. K-12 substr. MG1655]	-0.738924	-0.999596	-0.996683	-0.984873	-0.997602	-0.992698	-0.998254	-0.995898	-0.710915	-0.925683	-0.952281	-0.976205	-0.991829	-0.985808	-0.986816	0	0.000454	0.004866	0.029847	0.005207	0.007955	0.003282	0.004881	0.268635	0.057895	0.044587	0.01992	0.007339	0.016201	0.015383
>gi|90111103|ref|NP_414787.4| CP4-6 prophage; predicted GTP-binding protein [Escherichia coli str. K-12 substr. MG1655]	-0.772793	-0.996799	-0.988265	-0.978178	-0.995355	-0.977025	-0.993702	-0.993047	-0.697402	-0.847749	-0.909503	-0.937568	-0.985479	-0.96946	-0.975335	0	0.005458	0.00972	0.036624	0.007886	0.015018	0.006016	0.006577	0.169579	0.09326	0.096789	0.064589	0.012658	0.034112	0.027679
>gi|16128239|ref|NP_414788.1| CP4-6 prophage; predicted DNA-binding transcriptional regulator [Escherichia coli str. K-12 substr. MG1655]	-0.973366	-0.998707	-0.995584	-0.979857	-0.995025	-0.99399	-0.998932	-0.99696	-0.896995	-0.898135	-0.932424	-0.96945	-0.980627	-0.983714	-0.982354	0	0.001154	0.00564	0.043233	0.011322	0.005662	0.001309	0.004025	0.079435	0.090194	0.075088	0.035442	0.016694	0.018242	0.013612
>gi|16128241|ref|NP_414790.1| IS30 transposase [Escherichia coli str. K-12 substr. MG1655]	-0.603389	-0.993584	-0.996065	-0.993443	-0.997768	-0.992593	-0.996978	-0.99776	-0.733979	-0.931122	-0.959425	-0.986215	-0.964885	-0.986271	-0.985569	0	0.010022	0.00513	0.011049	0.003073	0.010999	0.004575	0.002015	0.285682	0.076595	0.040693	0.01225	0.087343	0.024779	0.020064
>gi|16128244|ref|NP_414793.1| IS5 transposase and trans-activator [Escherichia coli str. K-12 substr. MG1655]	-0.744568	-0.998613	-0.994676	-0.986873	-0.997403	-0.997758	-0.999282	-0.99762	-0.879701	-0.959683	-0.990406	-0.996298	-0.996596	-0.995505	-0.995853	0	0.003257	0.009412	0.032106	0.006135	0.00217	0.001499	0.003123	0.126844	0.040309	0.012338	0.004871	0.003903	0.006146	0.008357
>gi|90111105|ref|NP_414794.4| CP4-6 prophage; predicted S-methylmethionine transporter [Escherichia coli str. K-12 substr. MG1655]	-0.481537	-0.99986	-0.999557	-0.996599	-0.99954	-0.989531	-0.999727	-0.998744	-0.107494	-0.518472	-0.613309	-0.835024	-0.843406	-0.89492	-0.91297	0	0.000126	0.000434	0.007074	0.001287	0.026307	0.000617	0.00171	0.665473	0.344221	0.30235	0.138754	0.13995	0.1	0.073333
>gi|16128246|ref|NP_414795.1| CP4-6 prophage; S-methylmethionine:homocysteine methyltransferase [Escherichia coli str. K-12 substr. MG1655]	-0.8718	-0.999718	-0.999495	-0.993915	-0.998562	-0.999055	-0.999901	-0.998912	-0.766341	-0.751448	-0.886894	-0.885884	-0.935491	-0.967015	-0.907428	0	0.000548	0.000617	0.016541	0.004287	0.000735	0.000141	0.001506	0.231841	0.150502	0.093687	0.073864	0.049591	0.029417	0.097158
>gi|90111106|ref|NP_414796.2| CP4-6 prophage; predicted ferric transporter subunit [Escherichia coli str. K-12 substr. MG1655]	-0.690179	-0.948206	-0.8439	-0.719906	-0.907351	-0.840927	-0.940595	-0.944421	-0.718118	-0.761113	-0.914799	-0.916175	-0.9444	-0.919781	-0.957563	0	0.067347	0.124173	0.27522	0.142118	0.099326	0.069258	0.049484	0.161758	0.095183	0.076506	0.044794	0.038293	0.042347	0.029104
>gi|16128249|ref|NP_414798.1| IS1 transposase B [Escherichia coli str. K-12 substr. MG1655]	-0.955776	-0.999947	-0.999875	-0.991987	-0.999726	-0.999262	-0.999707	-0.999518	-0.875571	-0.94801	-0.98771	-0.985644	-0.997424	-0.996047	-0.99258	0	7e-05	0.000129	0.024962	0.000816	0.001074	0.000607	0.000658	0.226005	0.055753	0.01972	0.028537	0.003567	0.003818	0.013912
>gi|16128250|ref|NP_414799.1| IS1 repressor TnpA [Escherichia coli str. K-12 substr. MG1655]	0.401317	-0.999724	-0.999917	-0.998255	-0.999936	-0.999724	-0.999862	-0.999872	-0.509051	-0.414534	-0.755725	-0.488932	-0.765965	-0.874296	-0.917556	0	0.000595	0.000164	0.003894	0.000101	0.000563	0.000277	0.000192	0.40013	0.549803	0.227109	0.52426	0.485684	0.135667	0.142979
>gi|16128252|ref|NP_414801.1| CP4-6 prophage; predicted DNA-binding transcriptional regulator [Escherichia coli str. K-12 substr. MG1655]	-0.102064	-0.99999	-0.999974	-0.997241	-0.999891	-0.999842	-0.999974	-0.999786	-0.651368	-0.867639	-0.907709	-0.912274	-0.977787	-0.965696	-0.956853	0	1.4e-05	2.2e-05	0.008571	0.000329	0.000223	4.9e-05	0.00029	0.220446	0.11198	0.074756	0.089406	0.02325	0.031967	0.036941
>gi|16128253|ref|NP_414802.1| CP4-6 prophage; predicted lyase/synthase [Escherichia coli str. K-12 substr. MG1655]	-0.972008	-0.960418	-0.983046	-0.945643	-0.985785	-0.978341	-0.992501	-0.995093	-0.684636	-0.780073	-0.885731	-0.926152	-0.955941	-0.953165	-0.944424	0	0.055769	0.019916	0.074927	0.026531	0.015993	0.008004	0.0049	0.135757	0.101878	0.070664	0.048077	0.044715	0.059957	0.050788
>gi|16128254|ref|NP_414803.1| CP4-6 prophage; predicted dehydratase [Escherichia coli str. K-12 substr. MG1655]	-0.873276	-0.99952	-0.999054	-0.995772	-0.998214	-0.998115	-0.999828	-0.999164	-0.31557	-0.553258	-0.77503	-0.778932	-0.88728	-0.900451	-0.912338	0	0.000455	0.0007	0.009333	0.005282	0.002348	0.000225	0.000949	0.285603	0.201151	0.144662	0.102275	0.057944	0.105279	0.0703
>gi|16128255|ref|NP_414804.1| CP4-6 prophage; predicted sugar transporter [Escherichia coli str. K-12 substr. MG1655]	-0.786853	-0.995107	-0.991698	-0.98906	-0.998995	-0.974024	-0.998277	-0.993598	-0.099521	-0.521608	-0.675704	-0.756468	-0.848676	-0.80618	-0.886924	0	0.013708	0.017073	0.012353	0.002171	0.053784	0.002817	0.009604	0.55126	0.262509	0.221729	0.15576	0.130561	0.109624	0.086093
>gi|16128256|ref|NP_414805.1| CP4-6 prophage; predicted xylosidase/arabinosidase [Escherichia coli str. K-12 substr. MG1655]	-0.376656	-0.999874	-0.999956	-0.99782	-0.999617	-0.999623	-0.999973	-0.999271	0.539129	0.107919	-0.250622	-0.484275	-0.592825	-0.626632	-0.755493	0	0.000311	5.3e-05	0.006217	0.001145	0.000485	4.3e-05	0.000993	0.238912	0.44748	0.408324	0.296746	0.303227	0.280061	0.174773
>gi|16128257|ref|NP_414806.1| CP4-6 prophage; predicted DNA-binding transcriptional regulator [Escherichia coli str. K-12 substr. MG1655]	-0.985983	-0.999196	-0.994843	-0.972039	-0.995018	-0.994604	-0.999047	-0.99564	-0.674572	-0.793383	-0.820056	-0.919387	-0.957184	-0.964973	-0.922919	0	0.000894	0.006413	0.07281	0.011331	0.004367	0.001014	0.00489	0.1578	0.156033	0.184599	0.064335	0.049271	0.03501	0.101472
>gi|16128258|ref|NP_414807.1| ornithine carbamoyltransferase 2, chain F; CP4-6 prophage [Escherichia coli str. K-12 substr. MG1655]	-0.924437	-0.671228	-0.6989	-0.715956	-0.806566	-0.90716	-0.96517	-0.952835	-0.371228	-0.391806	-0.583127	-0.725462	-0.798738	-0.708337	-0.784377	0	0.323336	0.143242	0.230301	0.153878	0.054869	0.043682	0.052285	0.260756	0.18463	0.282269	0.196877	0.123597	0.162463	0.156549
>gi|16128259|ref|NP_414808.1| IS1 transposase B [Escherichia coli str. K-12 substr. MG1655]	-0.955776	-0.999947	-0.999875	-0.991987	-0.999726	-0.999262	-0.999707	-0.999518	-0.875571	-0.94801	-0.98771	-0.985644	-0.997424	-0.996047	-0.99258	0	7e-05	0.000129	0.024962	0.000816	0.001074	0.000607	0.000658	0.226005	0.055753	0.01972	0.028537	0.003567	0.003818	0.013912
>gi|16128260|ref|NP_414809.1| IS1 repressor TnpA [Escherichia coli str. K-12 substr. MG1655]	0.401317	-0.999724	-0.999917	-0.998255	-0.999936	-0.999724	-0.999862	-0.999872	-0.509051	-0.414534	-0.755725	-0.488932	-0.765965	-0.874296	-0.917556	0	0.000595	0.000164	0.003894	0.000101	0.000563	0.000277	0.000192	0.40013	0.549803	0.227109	0.52426	0.485684	0.135667	0.142979
>gi|16128262|ref|NP_414811.1| CP4-6 prophage; conserved protein [Escherichia coli str. K-12 substr. MG1655]	0.161152	-0.999639	-0.999861	-0.997015	-0.998794	-0.997793	-0.999872	-0.997841	-0.902744	-0.919077	-0.977777	-0.980812	-0.969488	-0.980999	-0.991957	0	0.000633	0.000291	0.006021	0.003756	0.003316	0.000219	0.004816	0.099666	0.096811	0.023142	0.021023	0.040874	0.015623	0.011997
>gi|16128263|ref|NP_414812.1| CP4-6 prophage; DNA-binding protein [Escherichia coli str. K-12 substr. MG1655]	-0.954763	-0.99995	-0.999923	-0.998988	-0.999719	-0.999854	-0.999988	-0.999798	-0.951582	-0.970576	-0.986775	-0.994249	-0.995925	-0.991991	-0.996951	0	9.2e-05	0.000179	0.002802	0.000846	0.000145	2.3e-05	0.000326	0.05013	0.035788	0.022575	0.005934	0.005181	0.0106	0.005383
>gi|16128264|ref|NP_414813.1| CP4-6 prophage; predicted protein [Escherichia coli str. K-12 substr. MG1655]	0.491889	-0.997001	-0.9982	-0.99427	-0.997115	-0.995642	-0.999798	-0.997729	-0.688129	-0.854726	-0.931532	-0.963271	-0.982605	-0.979558	-0.991265	0	0.004144	0.00238	0.009684	0.006456	0.004593	0.000241	0.003595	0.191881	0.083343	0.047275	0.030953	0.020703	0.022485	0.010288
>gi|16128265|ref|NP_414814.1| CP4-6 prophage; predicted protein [Escherichia coli str. K-12 substr. MG1655]	0.794256	-0.873239	-0.979177	-0.980196	-0.988537	-0.992895	-0.998427	-0.997649	-0.610085	-0.679042	-0.683957	-0.877467	-0.959874	-0.90392	-0.969735	0	0.222058	0.024165	0.033558	0.019445	0.00806	0.002693	0.00349	0.304111	0.292002	0.35402	0.087878	0.032154	0.091477	0.032276
>gi|16128266|ref|NP_414815.1| CP4-6 prophage; predicted phage integrase [Escherichia coli str. K-12 substr. MG1655]	-0.786198	-0.998641	-0.998557	-0.992138	-0.99854	-0.996189	-0.999483	-0.998884	-0.748974	-0.864321	-0.955889	-0.979721	-0.983865	-0.975928	-0.985771	0	0.002425	0.00158	0.017575	0.00306	0.004498	0.000573	0.001049	0.160086	0.156148	0.045463	0.02154	0.029414	0.042239	0.01553
>gi|16128268|ref|NP_414817.1| moco insertion factor for PaoABC aldehyde oxidoreductase [Escherichia coli str. K-12 substr. MG1655]	-0.916498	-0.99989	-0.999215	-0.993077	-0.998988	-0.997951	-0.99963	-0.998277	-0.768887	-0.819999	-0.878464	-0.919765	-0.955834	-0.955097	-0.953941	0	0.000128	0.000746	0.016809	0.002871	0.002424	0.000511	0.002286	0.166999	0.120035	0.079011	0.065956	0.038398	0.039478	0.038026
>gi|16128269|ref|NP_414818.1| PaoABC aldehyde oxidoreductase, Moco-containing subunit [Escherichia coli str. K-12 substr. MG1655]	-0.35169	-0.746853	-0.87434	-0.87046	-0.87098	-0.942248	-0.988593	-0.985444	-0.431498	-0.629932	-0.785673	-0.791222	-0.887067	-0.909719	-0.911413	0	0.139298	0.048154	0.078013	0.092792	0.032962	0.00723	0.00827	0.170022	0.146068	0.123796	0.059028	0.051306	0.062486	0.045409
>gi|16128270|ref|NP_414819.1| PaoABC aldehyde oxidoreductase, FAD-containing subunit [Escherichia coli str. K-12 substr. MG1655]	-0.774553	-0.984529	-0.9893	-0.975337	-0.989374	-0.98157	-0.997151	-0.994936	-0.834983	-0.881974	-0.90799	-0.965382	-0.962606	-0.969149	-0.978058	0	0.014221	0.011728	0.022049	0.014635	0.022071	0.0039	0.004218	0.089113	0.085687	0.098998	0.030175	0.073986	0.041703	0.027871
>gi|16128271|ref|NP_414820.1| PaoABC aldehyde oxidoreductase, 2Fe-2S subunit [Escherichia coli str. K-12 substr. MG1655]	-0.498033	-0.999711	-0.999658	-0.997155	-0.998241	-0.999357	-0.999954	-0.999158	-0.487512	-0.384131	-0.618265	-0.749763	-0.768599	-0.77082	-0.871208	0	0.000742	0.000454	0.006257	0.005501	0.000551	7.7e-05	0.001137	0.323759	0.241638	0.308451	0.19519	0.188503	0.129933	0.206906
>gi|16128272|ref|NP_414821.1| inner membrane protein, DUF1440 family [Escherichia coli str. K-12 substr. MG1655]	-0.104314	-0.999872	-0.999559	-0.997335	-0.999123	-0.995789	-0.999691	-0.999135	-0.352573	-0.594341	-0.639177	-0.876496	-0.920962	-0.945833	-0.927096	0	0.000211	0.000724	0.004781	0.002619	0.007943	0.000784	0.001167	0.425354	0.332159	0.40557	0.130409	0.060574	0.047215	0.075669
>gi|16128273|ref|NP_414822.1| predicted ferredoxin [Escherichia coli str. K-12 substr. MG1655]	-0.114519	-0.996688	-0.999295	-0.986043	-0.998821	-0.981738	-0.999384	-0.989639	0.193173	0.232799	0.060747	0.203559	-0.032127	0.289079	-0.093924	0	0.004653	0.000904	0.022572	0.001986	0.05064	0.00172	0.028238	0.623498	0.594953	0.669539	0.475601	0.570019	0.486097	0.595497
>gi|90111108|ref|NP_414823.2| conserved protein [Escherichia coli str. K-12 substr. MG1655]	0.955133	-0.888284	-0.967709	-0.959671	-0.977482	-0.904045	-0.974808	-0.982515	-0.304147	-0.762253	-0.836356	-0.836979	-0.965341	-0.942066	-0.950837	0	0.159128	0.031781	0.035272	0.039881	0.094607	0.031094	0.013027	0.206047	0.144915	0.150663	0.121272	0.028392	0.069216	0.050925
>gi|16128275|ref|NP_414824.1| predicted receptor [Escherichia coli str. K-12 substr. MG1655]	0.989646	-0.957712	-0.982162	-0.982151	-0.993442	-0.9859	-0.999241	-0.99345	0.825669	0.801825	0.452882	0.299502	0.082842	0.394269	0.012098	0	0.058073	0.025132	0.018307	0.008602	0.015952	0.001104	0.00879	0.172606	0.199197	0.445518	0.400643	0.363608	0.216171	0.43941
>gi|16128276|ref|NP_414825.1| predicted aromatic compound dioxygenase [Escherichia coli str. K-12 substr. MG1655]	0.532422	-0.925427	-0.940854	-0.954217	-0.976447	-0.980329	-0.995715	-0.993774	0.410246	-0.052486	-0.308739	-0.380673	-0.706784	-0.770951	-0.700682	0	0.078104	0.058889	0.047619	0.025982	0.008829	0.004388	0.006319	0.24847	0.260511	0.285455	0.17787	0.191965	0.179438	0.128479
>gi|16128277|ref|NP_414826.1| predicted protein [Escherichia coli str. K-12 substr. MG1655]	0.375286	-0.879316	-0.911738	-0.916052	-0.95268	-0.940742	-0.985012	-0.992435	-0.688699	-0.906272	-0.94588	-0.959909	-0.985273	-0.983379	-0.989305	0	0.085295	0.073697	0.069933	0.045615	0.053183	0.016906	0.007151	0.12679	0.047057	0.073024	0.049431	0.010441	0.013219	0.011942
>gi|16128278|ref|NP_414827.1| cryptic Mat fimbrillin gene [Escherichia coli str. K-12 substr. MG1655]	0.99	-0.878072	-0.683646	-0.657938	-0.832102	-0.8746	-0.974159	-0.890114	0.835775	0.833433	0.749371	0.572359	0.404375	0.456777	0.385517	0	0.192832	0.492761	0.393382	0.375015	0.159387	0.046837	0.121654	0.249546	0.199011	0.207665	0.237848	0.292976	0.378631	0.350342
>gi|16128279|ref|NP_414828.1| predicted regulator [Escherichia coli str. K-12 substr. MG1655]	-0.839542	-0.994816	-0.995996	-0.984278	-0.994654	-0.986833	-0.999062	-0.991736	-0.895418	-0.963435	-0.994632	-0.99473	-0.994144	-0.989047	-0.996611	0	0.006892	0.005498	0.034292	0.013972	0.012027	0.00112	0.011822	0.085273	0.041726	0.005998	0.005522	0.009478	0.014238	0.005953
>gi|16128280|ref|NP_414829.1| predicted protein [Escherichia coli str. K-12 substr. MG1655]	-0.171661	-0.799918	-0.395892	-0.811227	-0.778387	-0.631232	-0.921071	-0.643708	-0.466996	-0.717553	-0.901865	-0.984263	-0.957121	-0.98692	-0.994989	0	0.423075	0.631033	0.253101	0.384543	0.440416	0.129234	0.421768	0.456891	0.526675	0.246157	0.016756	0.117514	0.02153	0.006495
>gi|94541137|ref|YP_588437.1| rpmJ (L36) paralog [Escherichia coli str. K-12 substr. MG1655]	-0.168839	-0.799918	-0.395892	-0.811227	-0.778387	-0.631232	-0.921071	-0.643708	-0.466996	-0.717553	-0.901865	-0.984263	-0.957121	-0.98692	-0.994989	0	0.423075	0.631033	0.253101	0.384543	0.440416	0.129234	0.421768	0.456891	0.526675	0.246157	0.016756	0.117514	0.02153	0.006495
>gi|16128281|ref|NP_414830.1| rpmE (L31) paralog [Escherichia coli str. K-12 substr. MG1655]	0.619623	-0.799918	-0.395892	-0.811227	-0.778387	-0.631232	-0.921071	-0.643708	-0.466996	-0.717553	-0.901865	-0.984263	-0.957121	-0.98692	-0.994989	0	0.423075	0.631033	0.253101	0.384543	0.440416	0.129234	0.421768	0.456891	0.526675	0.246157	0.016756	0.117514	0.02153	0.006495
>gi|226524699|ref|YP_002791238.1| expressed protein [Escherichia coli str. K-12 substr. MG1655]	-0.990939	-0.993137	-0.995008	-0.943804	-0.985186	-0.982328	-0.999892	-0.987589	-0.968727	-0.973511	-0.996031	-0.998735	-0.997954	-0.987605	-0.999145	0	0.01607	0.009872	0.156617	0.038519	0.023026	0.000194	0.023177	0.04736	0.039776	0.004289	0.002167	0.00343	0.026375	0.001819
>gi|226524700|ref|NP_414832.2| IS3 transposase A [Escherichia coli str. K-12 substr. MG1655]	-0.444617	-0.970844	-0.769621	-0.857416	-0.974012	-0.948886	-0.991909	-0.953726	-0.848176	-0.879488	-0.98415	-0.989145	-0.986614	-0.993067	-0.996547	0	0.065989	0.373913	0.270605	0.056511	0.048208	0.015816	0.058886	0.152204	0.319737	0.022024	0.017988	0.023402	0.008284	0.005078
>gi|16128284|ref|NP_414833.1| IS3 transposase B [Escherichia coli str. K-12 substr. MG1655]	-0.968959	-0.999874	-0.999768	-0.997842	-0.999848	-0.999407	-0.999835	-0.999322	-0.833734	-0.936414	-0.983045	-0.986632	-0.990924	-0.993401	-0.992737	0	0.000328	0.000353	0.005761	0.000307	0.000451	0.000233	0.001192	0.150449	0.072316	0.023414	0.014963	0.013575	0.006364	0.01023
>gi|90111110|ref|NP_414835.2| inner membrane protein, DUF417 family [Escherichia coli str. K-12 substr. MG1655]	-0.854704	-0.994326	-0.986166	-0.968199	-0.994765	-0.989998	-0.998844	-0.992147	0.295221	0.108072	-0.247418	-0.348801	-0.46133	-0.579821	-0.770412	0	0.005604	0.021503	0.062857	0.011305	0.011923	0.00082	0.009592	0.333961	0.351709	0.345886	0.275179	0.29441	0.310004	0.091651
>gi|90111111|ref|NP_414837.2| predicted protein [Escherichia coli str. K-12 substr. MG1655]	0.50155	-0.580574	-0.828458	-0.905282	-0.872449	-0.951403	-0.98343	-0.995547	-0.263173	-0.506655	-0.567521	-0.810553	-0.905609	-0.738319	-0.945478	0	0.753235	0.265577	0.188582	0.256503	0.104787	0.047032	0.007024	0.451973	0.346616	0.453866	0.105449	0.095404	0.413864	0.071019
>gi|90111112|ref|NP_414838.2| predicted pyridine nucleotide-disulfide oxidoreductase [Escherichia coli str. K-12 substr. MG1655]	-0.985329	-0.911582	-0.951705	-0.942464	-0.962995	-0.977155	-0.996379	-0.994523	-0.722233	-0.801042	-0.908949	-0.938364	-0.970797	-0.970933	-0.978559	0	0.153285	0.067636	0.055878	0.05554	0.015826	0.003667	0.005081	0.19346	0.102932	0.051935	0.036287	0.019966	0.016987	0.018776
>gi|16128290|ref|NP_414839.1| predicted DNA-binding transcriptional regulator [Escherichia coli str. K-12 substr. MG1655]	-0.034125	-0.999962	-0.999581	-0.995483	-0.999499	-0.999103	-0.999921	-0.999128	-0.646236	-0.769508	-0.790793	-0.901517	-0.957723	-0.95695	-0.940653	0	3e-05	0.000441	0.012625	0.001303	0.000927	9.8e-05	0.001088	0.245207	0.160539	0.15038	0.070347	0.032396	0.034016	0.062991
>gi|16128291|ref|NP_414840.1| predicted oxidoreductase [Escherichia coli str. K-12 substr. MG1655]	-0.93443	-0.999043	-0.993906	-0.988017	-0.995757	-0.985845	-0.999003	-0.994575	-0.49664	-0.662706	-0.697374	-0.806797	-0.886041	-0.794949	-0.902244	0	0.000974	0.007432	0.015521	0.012642	0.018211	0.001315	0.006851	0.269478	0.212805	0.198331	0.125456	0.077904	0.090492	0.06993
>gi|16128292|ref|NP_414841.1| predicted electron transport protein with ferridoxin-like domai [Escherichia coli str. K-12 substr. MG1655]	-0.946764	-0.999606	-0.999295	-0.99613	-0.99859	-0.998154	-0.99962	-0.998882	-0.860538	-0.924683	-0.962997	-0.981579	-0.990265	-0.986383	-0.991949	0	0.000689	0.00063	0.008002	0.003867	0.001843	0.000635	0.001195	0.121176	0.044439	0.027367	0.012657	0.010687	0.011427	0.009224
>gi|90111113|ref|NP_414842.4| predicted transporter [Escherichia coli str. K-12 substr. MG1655]	-0.659389	-0.977317	-0.937246	-0.95412	-0.983371	-0.936268	-0.994803	-0.981904	-0.703036	-0.822017	-0.892234	-0.917086	-0.948316	-0.909327	-0.966385	0	0.023868	0.082718	0.045313	0.035671	0.056133	0.004675	0.026538	0.211795	0.126567	0.076662	0.057871	0.040719	0.06864	0.024779
>gi|16128295|ref|NP_414844.1| predicted inner membrane protein [Escherichia coli str. K-12 substr. MG1655]	0.527044	-0.990674	-0.9107	-0.991368	-0.990201	-0.984391	-0.999044	-0.993439	-0.383209	-0.759106	-0.885589	-0.922826	-0.969985	-0.946229	-0.980438	0	0.010177	0.25828	0.007827	0.018579	0.022743	0.001083	0.012152	0.306839	0.15978	0.090771	0.108088	0.033477	0.065228	0.020588
>gi|16128296|ref|NP_414845.1| choline dehydrogenase, a flavoprotein [Escherichia coli str. K-12 substr. MG1655]	0.269267	-0.993569	-0.99144	-0.982384	-0.992025	-0.993239	-0.998672	-0.994551	-0.157513	-0.435052	-0.65023	-0.566582	-0.707266	-0.746102	-0.812902	0	0.007941	0.006967	0.020693	0.017587	0.005786	0.001611	0.007523	0.182628	0.190471	0.168905	0.143501	0.144391	0.11797	0.090508
>gi|16128297|ref|NP_414846.1| betaine aldehyde dehydrogenase, NAD-dependent [Escherichia coli str. K-12 substr. MG1655]	0.415229	-0.079938	-0.407943	-0.509144	-0.495478	-0.749274	-0.876894	-0.915796	0.30537	-0.022917	-0.337164	-0.295503	-0.520104	-0.566188	-0.623516	0	0.385859	0.292926	0.239886	0.257008	0.1348	0.081432	0.0659	0.252007	0.203735	0.283305	0.212151	0.171646	0.092912	0.107587
>gi|49176011|ref|NP_414847.3| DNA-binding transcriptional repressor [Escherichia coli str. K-12 substr. MG1655]	-0.475511	-0.99961	-0.998178	-0.990591	-0.998653	-0.998481	-0.999877	-0.998493	-0.711583	-0.801839	-0.953454	-0.986807	-0.990341	-0.992682	-0.980735	0	0.000749	0.003177	0.023949	0.003637	0.001733	0.000236	0.00178	0.324314	0.384801	0.063974	0.018365	0.01205	0.008459	0.033011
>gi|16128299|ref|NP_414848.1| choline transporter of high affinity [Escherichia coli str. K-12 substr. MG1655]	-0.779371	-0.992448	-0.986212	-0.973106	-0.995588	-0.983242	-0.997803	-0.990237	0.167558	-0.165105	-0.554601	-0.65931	-0.773389	-0.731881	-0.85819	0	0.011625	0.019729	0.030941	0.007143	0.020179	0.002233	0.011296	0.446928	0.413664	0.279557	0.169148	0.07709	0.124666	0.104872
>gi|16128300|ref|NP_414849.1| c-di-GMP-specific phosphodiesterase [Escherichia coli str. K-12 substr. MG1655]	-0.984018	-0.999048	-0.998582	-0.992995	-0.997843	-0.997955	-0.999851	-0.998859	-0.725011	-0.788913	-0.828169	-0.931238	-0.967111	-0.949896	-0.961727	0	0.001368	0.00226	0.01307	0.005648	0.002046	0.000202	0.001514	0.178232	0.072565	0.133342	0.042703	0.022952	0.024629	0.02914
>gi|16128301|ref|NP_414850.1| predicted DNA-bindng transcriptional regulator [Escherichia coli str. K-12 substr. MG1655]	-0.150614	-0.768518	-0.799847	-0.94001	-0.906736	-0.95355	-0.983145	-0.986527	-0.343324	-0.58944	-0.662501	-0.869606	-0.916661	-0.94102	-0.936026	0	0.475436	0.419001	0.05828	0.208108	0.044195	0.022093	0.011427	0.280475	0.21047	0.457056	0.164379	0.103602	0.049717	0.057819
>gi|16128302|ref|NP_414851.1| predicted inner membrane protein [Escherichia coli str. K-12 substr. MG1655]	-0.331435	-0.999838	-0.999877	-0.99649	-0.999928	-0.998868	-0.999984	-0.99979	0.645554	0.318144	0.038159	-0.436765	-0.512367	-0.452132	-0.53065	0	0.000432	0.00024	0.011016	0.000198	0.003264	4.7e-05	0.000308	0.560957	0.694364	0.625942	0.441521	0.462716	0.485215	0.544317
>gi|16128303|ref|NP_414852.1| ankyrin repeat protein [Escherichia coli str. K-12 substr. MG1655]	-0.984494	-0.998364	-0.998634	-0.99384	-0.990261	-0.996883	-0.998777	-0.997981	-0.666137	-0.563144	-0.830002	-0.915676	-0.955659	-0.95972	-0.960071	0	0.002326	0.00267	0.011331	0.03052	0.003415	0.002498	0.003007	0.257659	0.430019	0.182864	0.058168	0.033304	0.028041	0.03776
>gi|16128304|ref|NP_414853.1| predicted protein [Escherichia coli str. K-12 substr. MG1655]	-0.995746	-0.999207	-0.999423	-0.996278	-0.995766	-0.999223	-0.999894	-0.99941	-0.885585	-0.887573	-0.96897	-0.973652	-0.989781	-0.989755	-0.987028	0	0.00167	0.000745	0.006947	0.009506	0.000687	0.000196	0.000911	0.075522	0.059331	0.025873	0.040472	0.011204	0.011045	0.013487
>gi|16128305|ref|NP_414854.1| predicted acyl-CoA synthetase with NAD(P)-binding domain and succinyl-CoA synthetase domain [Escherichia coli str. K-12 substr. MG1655]	-0.983443	-0.999207	-0.999423	-0.996278	-0.995766	-0.999223	-0.999894	-0.99941	-0.885585	-0.887573	-0.96897	-0.973652	-0.989781	-0.989755	-0.987028	0	0.00167	0.000745	0.006947	0.009506	0.000687	0.000196	0.000911	0.075522	0.059331	0.025873	0.040472	0.011204	0.011045	0.013487
>gi|16128306|ref|NP_414855.1| conserved protein [Escherichia coli str. K-12 substr. MG1655]	-0.631988	-0.99247	-0.978203	-0.964109	-0.983154	-0.987607	-0.999323	-0.99374	0.297191	0.096392	-0.472315	-0.33964	-0.493092	-0.637372	-0.690489	0	0.008376	0.024523	0.049998	0.046427	0.014137	0.00077	0.007747	0.326303	0.257122	0.315513	0.232796	0.198423	0.153229	0.237332
>gi|16128308|ref|NP_414857.1| carbamate kinase-like protein [Escherichia coli str. K-12 substr. MG1655]	-0.986708	-0.949646	-0.966223	-0.933954	-0.964383	-0.959218	-0.992152	-0.989267	-0.831929	-0.854114	-0.935872	-0.958496	-0.98109	-0.966021	-0.981711	0	0.075641	0.030879	0.08989	0.086683	0.032705	0.0106	0.009349	0.124302	0.071926	0.062925	0.034222	0.012663	0.028634	0.02592
>gi|16128309|ref|NP_414858.1| predicted deaminase with metallo-dependent hydrolase domain [Escherichia coli str. K-12 substr. MG1655]	-0.680483	-0.920356	-0.930702	-0.8982	-0.941291	-0.963186	-0.990342	-0.985544	-0.721607	-0.78156	-0.857793	-0.913424	-0.954115	-0.953431	-0.96392	0	0.063041	0.050613	0.107667	0.055576	0.019123	0.009917	0.011949	0.169197	0.07876	0.080661	0.042339	0.02486	0.026778	0.024926
>gi|16128310|ref|NP_414859.1| predicted oxidoreductase, Zn-dependent and NAD(P)-binding [Escherichia coli str. K-12 substr. MG1655]	-0.988422	-0.920356	-0.930702	-0.8982	-0.941291	-0.963186	-0.990342	-0.985544	-0.721607	-0.78156	-0.857793	-0.913424	-0.954115	-0.953431	-0.96392	0	0.063041	0.050613	0.107667	0.055576	0.019123	0.009917	0.011949	0.169197	0.07876	0.080661	0.042339	0.02486	0.026778	0.024926
>gi|16128311|ref|NP_414860.1| predicted protein [Escherichia coli str. K-12 substr. MG1655]	-0.156294	-0.984573	-0.990569	-0.967082	-0.985145	-0.963096	-0.995529	-0.98791	-0.872451	-0.861086	-0.9736	-0.983372	-0.981314	-0.975592	-0.991799	0	0.025673	0.014419	0.042696	0.040458	0.037909	0.004682	0.01501	0.082402	0.270213	0.021127	0.014937	0.021015	0.027355	0.009253
>gi|90111114|ref|NP_414861.2| predicted protein [Escherichia coli str. K-12 substr. MG1655]	-0.141642	-0.999985	-0.999883	-0.988358	-0.999552	-0.999458	-0.999881	-0.999793	-0.600694	-0.725183	-0.790655	-0.882884	-0.881778	-0.90375	-0.924976	0	3.2e-05	0.000159	0.036326	0.001345	0.000956	0.000233	0.00026	0.262152	0.337572	0.163702	0.101866	0.262808	0.157777	0.077731
>gi|16128313|ref|NP_414862.1| inner membrane protein, LysE transporter family; overproduction confers sensitivity to L-homoserine [Escherichia coli str. K-12 substr. MG1655]	-0.912372	-0.999838	-0.988375	-0.992647	-0.998383	-0.983895	-0.998931	-0.996581	-0.033979	-0.532778	-0.687751	-0.8982	-0.894388	-0.926964	-0.946844	0	0.000316	0.031775	0.011511	0.003839	0.031574	0.001622	0.004877	0.45765	0.418529	0.449806	0.087817	0.180454	0.090807	0.052905
>gi|16128314|ref|NP_414863.1| predicted protein [Escherichia coli str. K-12 substr. MG1655]	-0.563824	0.399122	0.169012	-0.173808	-0.08615	-0.464398	-0.690813	-0.806337	-0.05119	-0.201055	-0.487539	-0.772392	-0.779158	-0.638573	-0.776094	0	0.526903	0.559711	0.474715	0.453704	0.257907	0.497359	0.198112	0.530937	0.350849	0.340742	0.157273	0.326216	0.205282	0.176574
>gi|16128315|ref|NP_414864.1| propionate catabolism operon regulatory protein [Escherichia coli str. K-12 substr. MG1655]	-0.845977	-0.985165	-0.93988	-0.903661	-0.96694	-0.950797	-0.990734	-0.984221	-0.798846	-0.913469	-0.947844	-0.974879	-0.981151	-0.978351	-0.982156	0	0.013976	0.074935	0.084372	0.043656	0.036743	0.009581	0.014431	0.11291	0.06081	0.04439	0.023304	0.022397	0.027538	0.020405
>gi|16128316|ref|NP_414865.1| 2-methylisocitrate lyase [Escherichia coli str. K-12 substr. MG1655]	-0.591393	0.567172	0.219001	0.315786	0.189777	-0.312971	-0.711687	-0.770366	-0.843327	-0.875987	-0.940927	-0.959098	-0.974433	-0.97296	-0.984585	0	0.237021	0.292227	0.304129	0.493374	0.263894	0.207389	0.214991	0.105083	0.101631	0.047543	0.035007	0.018316	0.022987	0.016048
>gi|16128318|ref|NP_414867.1| 2-methylcitrate synthase [Escherichia coli str. K-12 substr. MG1655]	-0.925945	-0.998838	-0.999296	-0.991951	-0.998118	-0.998886	-0.99985	-0.999257	-0.847027	-0.861462	-0.881554	-0.933038	-0.973669	-0.974367	-0.973567	0	0.001516	0.000732	0.021321	0.004387	0.001065	0.000145	0.000848	0.111785	0.071953	0.092297	0.02269	0.023993	0.014947	0.023636
>gi|16128319|ref|NP_414868.1| 2-methylcitrate dehydratase [Escherichia coli str. K-12 substr. MG1655]	-0.227783	-0.331103	-0.393469	-0.432859	-0.570285	-0.651762	-0.783095	-0.843576	-0.69538	-0.819242	-0.921853	-0.948484	-0.969055	-0.965056	-0.979067	0	0.319227	0.285122	0.21846	0.208603	0.145782	0.045145	0.161307	0.162539	0.103219	0.0495	0.033256	0.023436	0.022602	0.016692
>gi|16128320|ref|NP_414869.1| propionate--CoA ligase [Escherichia coli str. K-12 substr. MG1655]	0.051339	-0.99919	-0.997679	-0.990156	-0.997981	-0.995892	-0.99917	-0.997897	-0.207729	-0.547279	-0.704935	-0.783706	-0.905089	-0.899034	-0.904127	0	0.000665	0.002496	0.021592	0.005316	0.003865	0.00107	0.002449	0.205085	0.193911	0.161682	0.103605	0.039225	0.076709	0.068635
>gi|16128321|ref|NP_414870.1| cytosine transporter [Escherichia coli str. K-12 substr. MG1655]	0.042371	-0.999745	-0.998626	-0.992675	-0.999285	-0.983355	-0.99985	-0.998713	0.223229	-0.402477	-0.483273	-0.742981	-0.727857	-0.88522	-0.865755	0	0.000237	0.001969	0.015346	0.001783	0.04514	0.000215	0.001753	0.550205	0.41672	0.45543	0.176518	0.225082	0.085772	0.113944
>gi|16128322|ref|NP_414871.1| cytosine deaminase [Escherichia coli str. K-12 substr. MG1655]	-0.9399	-0.996116	-0.995854	-0.982239	-0.994796	-0.996538	-0.99924	-0.997391	-0.750086	-0.739112	-0.901749	-0.935683	-0.972897	-0.982204	-0.965414	0	0.007313	0.004496	0.039412	0.010872	0.002871	0.000923	0.002692	0.1181	0.19992	0.048465	0.038786	0.024511	0.011999	0.033431
>gi|157783149|ref|NP_414872.3| transcriptional activator of cyn operon; autorepressor [Escherichia coli str. K-12 substr. MG1655]	-0.994164	-0.99979	-0.999379	-0.989014	-0.99884	-0.999102	-0.999825	-0.998694	-0.932502	-0.89549	-0.959215	-0.988779	-0.992658	-0.990143	-0.990272	0	0.000376	0.000537	0.029445	0.003156	0.00072	0.000236	0.001604	0.061376	0.096388	0.040664	0.011546	0.006427	0.01069	0.010123
>gi|16128324|ref|NP_414873.1| carbonic anhydrase [Escherichia coli str. K-12 substr. MG1655]	-0.781455	-0.999582	-0.998264	-0.99401	-0.99869	-0.996441	-0.999464	-0.998438	-0.898468	-0.914253	-0.954596	-0.975939	-0.990325	-0.984852	-0.993362	0	0.000591	0.002268	0.009486	0.003126	0.003144	0.000669	0.002459	0.084046	0.059668	0.040532	0.020636	0.00734	0.016626	0.007914
>gi|16128325|ref|NP_414874.1| cyanate aminohydrolase [Escherichia coli str. K-12 substr. MG1655]	-0.990542	0.151049	0.03735	0.452458	-0.166121	-0.03897	-0.400194	-0.726329	-0.800803	-0.836936	-0.941068	-0.936942	-0.957014	-0.942857	-0.969554	0	0.45487	0.599419	0.363164	0.529262	0.404144	0.485055	0.279009	0.097656	0.089531	0.0451	0.064539	0.025666	0.030657	0.030724
>gi|16128326|ref|NP_414875.1| predicted cyanate transporter [Escherichia coli str. K-12 substr. MG1655]	-0.99809	-0.999997	-0.999846	-0.985763	-0.999861	-0.999276	-0.999979	-0.999774	-0.188278	-0.578034	-0.726975	-0.85736	-0.874265	-0.926205	-0.942152	0	6e-06	0.000425	0.044858	0.000429	0.001994	3.5e-05	0.000301	0.490761	0.355686	0.174466	0.140558	0.177921	0.117667	0.065322
>gi|16128327|ref|NP_414876.1| thiogalactoside acetyltransferase [Escherichia coli str. K-12 substr. MG1655]	-0.146593	-0.998503	-0.997197	-0.992364	-0.993561	-0.994762	-0.999722	-0.995518	0.17335	-0.267186	-0.207119	-0.416666	-0.697801	-0.741822	-0.825746	0	0.001621	0.003292	0.014372	0.017085	0.007121	0.000411	0.00627	0.421268	0.296475	0.426857	0.421515	0.235105	0.170987	0.170857
>gi|16128328|ref|NP_414877.1| lactose permease [Escherichia coli str. K-12 substr. MG1655]	-0.842555	-0.998921	-0.998163	-0.991825	-0.998439	-0.979084	-0.999423	-0.996555	0.038541	-0.495764	-0.310651	-0.730809	-0.866298	-0.636693	-0.778382	0	0.001621	0.002221	0.011793	0.002727	0.051836	0.001741	0.005608	0.667666	0.433045	0.642349	0.191518	0.16501	0.302262	0.328896
>gi|16128329|ref|NP_414878.1| beta-D-galactosidase [Escherichia coli str. K-12 substr. MG1655]	-0.285539	-0.999761	-0.999122	-0.992695	-0.998693	-0.998272	-0.999629	-0.998358	0.17319	-0.456849	-0.620424	-0.67462	-0.829016	-0.869922	-0.808249	0	0.000171	0.000997	0.019721	0.00344	0.001577	0.000595	0.001915	0.288849	0.275223	0.164198	0.171535	0.111885	0.099434	0.191331
>gi|49176012|ref|NP_414879.3| DNA-binding transcriptional repressor [Escherichia coli str. K-12 substr. MG1655]	-0.290462	-0.983488	-0.947984	-0.926532	-0.978418	-0.958442	-0.993637	-0.983593	-0.70451	-0.836559	-0.909692	-0.936856	-0.973381	-0.971389	-0.968698	0	0.018476	0.058745	0.108527	0.039327	0.033078	0.007845	0.014787	0.169426	0.077143	0.077565	0.044685	0.029815	0.025675	0.036787
>gi|145698223|ref|NP_414880.2| DNA-binding transcriptional activator, 3HPP-binding [Escherichia coli str. K-12 substr. MG1655]	-0.878761	-0.999564	-0.980352	-0.960298	-0.993965	-0.983574	-0.999276	-0.98861	-0.670421	-0.900608	-0.933538	-0.969011	-0.984509	-0.972956	-0.982315	0	0.000745	0.036491	0.10033	0.016447	0.025711	0.001129	0.014319	0.164523	0.05618	0.047379	0.026111	0.017294	0.044888	0.017394
>gi|16128332|ref|NP_414881.1| 3-(3-hydroxyphenyl)propionate hydroxylase [Escherichia coli str. K-12 substr. MG1655]	-0.028336	-0.999564	-0.980352	-0.960298	-0.993965	-0.983574	-0.999276	-0.98861	-0.670421	-0.900608	-0.933538	-0.969011	-0.984509	-0.972956	-0.982315	0	0.000745	0.036491	0.10033	0.016447	0.025711	0.001129	0.014319	0.164523	0.05618	0.047379	0.026111	0.017294	0.044888	0.017394
>gi|16128333|ref|NP_414882.1| 2,3-dihydroxyphenylpropionate 1,2-dioxygenase [Escherichia coli str. K-12 substr. MG1655]	-0.507896	-0.998321	-0.996271	-0.981796	-0.996989	-0.995092	-0.999253	-0.997369	-0.636046	-0.734093	-0.841431	-0.879999	-0.929884	-0.932376	-0.939412	0	0.001586	0.003203	0.032197	0.008117	0.004706	0.001176	0.003478	0.202088	0.199932	0.11573	0.083472	0.042324	0.043816	0.038286
>gi|90111115|ref|NP_414883.4| 2-hydroxy-6-ketonona-2,4-dienedioic acid hydrolase [Escherichia coli str. K-12 substr. MG1655]	-0.023835	-0.991655	-0.985221	-0.972429	-0.965629	-0.990901	-0.997667	-0.997571	-0.229183	-0.56123	-0.648619	-0.714569	-0.859999	-0.81664	-0.827582	0	0.011665	0.014125	0.041353	0.090523	0.007588	0.00198	0.002571	0.258577	0.234443	0.113355	0.140319	0.064143	0.073186	0.086508
>gi|90111116|ref|NP_414884.2| 2-keto-4-pentenoate hydratase [Escherichia coli str. K-12 substr. MG1655]	-0.895123	-0.988987	-0.967211	-0.950807	-0.98427	-0.973862	-0.996576	-0.992365	-0.638852	-0.746207	-0.879403	-0.893074	-0.948484	-0.949362	-0.95825	0	0.007902	0.026447	0.057221	0.036544	0.020566	0.003834	0.008192	0.166761	0.151498	0.08638	0.055334	0.028813	0.035889	0.036794
>gi|16128336|ref|NP_414885.1| acetaldehyde-CoA dehydrogenase II, NAD-binding [Escherichia coli str. K-12 substr. MG1655]	-0.922803	-0.460405	-0.638563	-0.611417	-0.820192	-0.817017	-0.980685	-0.937348	-0.660554	-0.752613	-0.889133	-0.905805	-0.946535	-0.950136	-0.978671	0	0.51142	0.27986	0.277359	0.242861	0.118733	0.026684	0.051443	0.182465	0.166405	0.070133	0.05713	0.031483	0.039875	0.021461
>gi|16128337|ref|NP_414886.1| 4-hyroxy-2-oxovalerate/4-hydroxy-2-oxopentanoic acid aldolase, class I [Escherichia coli str. K-12 substr. MG1655]	-0.993862	-0.997211	-0.994657	-0.96701	-0.99217	-0.995377	-0.999303	-0.997024	-0.870702	-0.851913	-0.927494	-0.938436	-0.970869	-0.97538	-0.97757	0	0.003351	0.003922	0.070067	0.020646	0.004376	0.000926	0.003385	0.085169	0.094675	0.0666	0.038592	0.02062	0.018294	0.023433
>gi|90111117|ref|NP_414887.2| predicted 3-hydroxyphenylpropionic transporter [Escherichia coli str. K-12 substr. MG1655]	-0.611516	-0.999865	-0.99627	-0.987497	-0.998882	-0.979683	-0.999789	-0.997479	0.145747	-0.6018	-0.634037	-0.776174	-0.848296	-0.90093	-0.906404	0	0.00023	0.009678	0.03131	0.002859	0.054958	0.000439	0.003918	0.39213	0.32258	0.328647	0.201631	0.192741	0.110036	0.085316
>gi|90111118|ref|NP_414888.4| predicted protein [Escherichia coli str. K-12 substr. MG1655]	0.127689	-0.640015	-0.378194	-0.444508	-0.706599	-0.349034	-0.901877	-0.923946	-0.935384	-0.979711	-0.994316	-0.994576	-0.997131	-0.996554	-0.998409	0	0.479325	0.601778	0.557825	0.431301	0.550245	0.117708	0.073303	0.092576	0.034282	0.00589	0.009583	0.003163	0.005019	0.002293
>gi|16128340|ref|NP_414889.1| S-formylglutathione hydrolase [Escherichia coli str. K-12 substr. MG1655]	-0.738039	-0.998074	-0.999508	-0.991936	-0.998042	-0.998802	-0.999912	-0.99815	-0.801676	-0.858988	-0.935027	-0.922535	-0.979275	-0.979141	-0.981525	0	0.005095	0.000678	0.019956	0.005406	0.001408	9.3e-05	0.002556	0.109093	0.078864	0.054269	0.052585	0.021324	0.021116	0.016188
>gi|16128341|ref|NP_414890.1| alcohol dehydrogenase class III/glutathione-dependent formaldehyde dehydrogenase [Escherichia coli str. K-12 substr. MG1655]	-0.656819	-0.999649	-0.998242	-0.993802	-0.997277	-0.996775	-0.999609	-0.99833	-0.044971	-0.308363	-0.591502	-0.587144	-0.681023	-0.709903	-0.81197	0	0.00069	0.002863	0.013468	0.008431	0.003656	0.000878	0.002036	0.26634	0.305129	0.26848	0.219117	0.155099	0.156351	0.133866
>gi|162135894|ref|NP_414891.4| regulator protein that represses frmRAB operon [Escherichia coli str. K-12 substr. MG1655]	-0.947731	-0.894014	-0.769469	-0.779547	-0.930693	-0.813227	-0.979743	-0.9204	-0.909091	-0.946065	-0.968941	-0.983499	-0.985189	-0.979591	-0.990337	0	0.150345	0.149009	0.20256	0.116137	0.183287	0.017783	0.098588	0.061837	0.072338	0.035904	0.024036	0.017887	0.022138	0.013154
>gi|16128343|ref|NP_414892.1| outer membrane protein [Escherichia coli str. K-12 substr. MG1655]	-0.557946	-0.790495	-0.916217	-0.926038	-0.963238	-0.955724	-0.989439	-0.967556	0.37967	0.057268	-0.343575	-0.312743	-0.562758	-0.651186	-0.768527	0	0.538112	0.164245	0.086155	0.060533	0.045451	0.01426	0.033747	0.499326	0.304386	0.370576	0.347649	0.349449	0.352098	0.162009
>gi|145698224|ref|NP_414894.2| IS2 repressor TnpA [Escherichia coli str. K-12 substr. MG1655]	-0.739883	-0.988838	-0.912586	-0.891452	-0.97097	-0.975948	-0.998642	-0.980215	-0.830607	-0.939004	-0.975886	-0.983816	-0.992438	-0.985907	-0.946713	0	0.034405	0.230417	0.316863	0.079812	0.029147	0.001818	0.02075	0.166272	0.074717	0.032562	0.027712	0.010517	0.031943	0.158838
>gi|16128346|ref|NP_414895.1| IS2 transposase TnpB [Escherichia coli str. K-12 substr. MG1655]	-0.61357	-0.999818	-0.999615	-0.997434	-0.99951	-0.998256	-0.999756	-0.998928	-0.786969	-0.925454	-0.94626	-0.967554	-0.983318	-0.98012	-0.980863	0	0.000326	0.000336	0.00634	0.000891	0.001699	0.000439	0.001408	0.140692	0.057779	0.056302	0.024971	0.02047	0.029392	0.02362
>gi|16128348|ref|NP_414897.1| predicted glucosyltransferase [Escherichia coli str. K-12 substr. MG1655]	-0.415625	-0.9999	-0.999304	-0.996484	-0.999289	-0.987003	-0.998697	-0.997688	-0.127594	-0.61213	-0.746103	-0.801663	-0.895811	-0.856469	-0.917344	0	0.000126	0.000714	0.005736	0.001881	0.028783	0.002137	0.002261	0.500828	0.236977	0.15259	0.102299	0.074936	0.130624	0.059269
>gi|90111121|ref|NP_414898.4| conserved protein [Escherichia coli str. K-12 substr. MG1655]	-0.996318	-0.999037	-0.999086	-0.994017	-0.997274	-0.999121	-0.999899	-0.999427	-0.938551	-0.919817	-0.972431	-0.983087	-0.991954	-0.990049	-0.993537	0	0.001377	0.00132	0.011213	0.007724	0.001011	0.000107	0.00077	0.063588	0.068275	0.020556	0.021408	0.010368	0.009012	0.009796
>gi|90111122|ref|NP_414899.2| taurine transporter subunit [Escherichia coli str. K-12 substr. MG1655]	-0.584153	-0.826409	-0.797587	-0.820106	-0.893765	-0.794002	-0.953589	-0.975365	-0.53949	-0.685686	-0.819244	-0.889706	-0.951775	-0.878425	-0.908393	0	0.20331	0.16656	0.247419	0.117128	0.235302	0.037498	0.022648	0.344556	0.279199	0.200723	0.160221	0.089007	0.333002	0.086794
>gi|16128351|ref|NP_414900.1| taurine transporter subunit [Escherichia coli str. K-12 substr. MG1655]	-0.949303	-0.998177	-0.958832	-0.914849	-0.983896	-0.963663	-0.994724	-0.983849	-0.693904	-0.844086	-0.871448	-0.936609	-0.96357	-0.959041	-0.942166	0	0.003402	0.0796	0.173302	0.033875	0.038473	0.006428	0.021315	0.152427	0.102275	0.152459	0.050531	0.038759	0.036505	0.044353
>gi|16128352|ref|NP_414901.1| taurine transporter subunit [Escherichia coli str. K-12 substr. MG1655]	-0.999523	-0.999993	-0.998448	-0.988714	-0.998909	-0.995896	-0.999953	-0.999371	-0.178863	-0.554533	-0.446951	-0.782924	-0.788963	-0.8639	-0.933533	0	1e-05	0.003015	0.034749	0.0034	0.010819	7e-05	0.000734	0.378625	0.507161	0.672582	0.441677	0.34399	0.272494	0.074001
>gi|16128353|ref|NP_414902.1| taurine dioxygenase, 2-oxoglutarate-dependent [Escherichia coli str. K-12 substr. MG1655]	-0.896661	-0.992116	-0.988478	-0.978017	-0.991826	-0.99581	-0.997678	-0.996941	-0.758576	-0.789519	-0.942914	-0.974777	-0.98849	-0.993372	-0.980818	0	0.011895	0.023449	0.041895	0.01357	0.003298	0.002434	0.00365	0.467425	0.293337	0.067299	0.033344	0.016114	0.007159	0.019817
>gi|90111123|ref|NP_414903.4| 5-aminolevulinate dehydratase (porphobilinogen synthase) [Escherichia coli str. K-12 substr. MG1655]	-0.961356	-0.992116	-0.988478	-0.978017	-0.991826	-0.99581	-0.997678	-0.996941	-0.758576	-0.789519	-0.942914	-0.974777	-0.98849	-0.993372	-0.980818	0	0.011895	0.023449	0.041895	0.01357	0.003298	0.002434	0.00365	0.467425	0.293337	0.067299	0.033344	0.016114	0.007159	0.019817
>gi|16128357|ref|NP_414906.1| IS3 transposase B [Escherichia coli str. K-12 substr. MG1655]	-0.968959	-0.999874	-0.999768	-0.997842	-0.999848	-0.999407	-0.999835	-0.999322	-0.833734	-0.936414	-0.983045	-0.986632	-0.990924	-0.993401	-0.992737	0	0.000328	0.000353	0.005761	0.000307	0.000451	0.000233	0.001192	0.150449	0.072316	0.023414	0.014963	0.013575	0.006364	0.01023
>gi|226524701|ref|NP_414907.2| IS3 transposase A [Escherichia coli str. K-12 substr. MG1655]	-0.444617	-0.970844	-0.769621	-0.857416	-0.974012	-0.948886	-0.991909	-0.953726	-0.848176	-0.879488	-0.98415	-0.989145	-0.986614	-0.993067	-0.996547	0	0.065989	0.373913	0.270605	0.056511	0.048208	0.015816	0.058886	0.152204	0.319737	0.022024	0.017988	0.023402	0.008284	0.005078
>gi|226524702|ref|NP_414909.2| predicted DNA-binding transcriptional regulator [Escherichia coli str. K-12 substr. MG1655]	-0.018821	-0.996521	-0.987917	-0.982291	-0.992398	-0.983599	-0.997087	-0.991305	-0.516108	-0.800447	-0.906435	-0.948802	-0.982172	-0.978393	-0.983997	0	0.005613	0.018592	0.035274	0.018248	0.014037	0.004157	0.01022	0.231236	0.133131	0.090672	0.051875	0.019433	0.024048	0.012839
>gi|16128361|ref|NP_414910.1| penicillin-binding protein [Escherichia coli str. K-12 substr. MG1655]	0.746199	-0.924233	-0.908401	-0.900592	-0.887592	-0.895738	-0.975048	-0.977951	-0.058227	-0.647402	-0.776883	-0.852393	-0.918512	-0.936024	-0.93325	0	0.090708	0.075345	0.104275	0.168811	0.081482	0.028266	0.015654	0.307939	0.157272	0.221849	0.096599	0.106517	0.064394	0.052429
>gi|16128362|ref|NP_414911.1| microcin B17 transporter [Escherichia coli str. K-12 substr. MG1655]	-0.832531	-0.997211	-0.997796	-0.991727	-0.997822	-0.990472	-0.998733	-0.995234	-0.39254	-0.592282	-0.836243	-0.93468	-0.978413	-0.944115	-0.955166	0	0.007597	0.003519	0.017	0.005618	0.017552	0.003035	0.007011	0.523589	0.293197	0.173162	0.07014	0.021766	0.071947	0.059545
>gi|16128363|ref|NP_414912.1| probable lipoprotein required for swarming phenotype [Escherichia coli str. K-12 substr. MG1655]	0.153843	-0.989648	-0.966703	-0.951609	-0.990072	-0.962243	-0.996293	-0.991632	-0.65915	-0.904887	-0.950252	-0.958908	-0.990213	-0.979514	-0.983059	0	0.011959	0.039536	0.067781	0.014117	0.029797	0.003623	0.007517	0.104791	0.036981	0.059668	0.045915	0.007478	0.020292	0.015021
>gi|16128364|ref|NP_414913.1| inner membrane protein, DUF2755 family [Escherichia coli str. K-12 substr. MG1655]	-0.958234	-0.999994	-0.999945	-0.995708	-0.999865	-0.998262	-0.999857	-0.999579	-0.506446	-0.789831	-0.892664	-0.935154	-0.972876	-0.968968	-0.964376	0	9e-06	5.7e-05	0.012691	0.000416	0.004292	0.000373	0.000698	0.372458	0.190318	0.094522	0.073437	0.035998	0.038662	0.028793
>gi|90111125|ref|NP_414914.2| predicted inner membrane protein, DUF2754 family [Escherichia coli str. K-12 substr. MG1655]	-0.904796	-0.999965	-0.999568	-0.994115	-0.998905	-0.994996	-0.999468	-0.998092	-0.184154	-0.392915	-0.566391	-0.71633	-0.866676	-0.888632	-0.905959	0	4.6e-05	0.000895	0.01771	0.003285	0.012862	0.000902	0.00279	0.60868	0.588206	0.433962	0.401914	0.297867	0.179912	0.124667
>gi|16128366|ref|NP_414915.1| D-alanine-D-alanine ligase A [Escherichia coli str. K-12 substr. MG1655]	-0.929728	-0.841093	-0.898208	-0.876612	-0.951729	-0.938504	-0.984928	-0.986383	-0.584084	-0.737495	-0.839853	-0.883072	-0.945336	-0.935967	-0.953593	0	0.166157	0.089054	0.118307	0.062223	0.042723	0.014441	0.014544	0.157049	0.170355	0.077149	0.06552	0.032521	0.031378	0.03545
>gi|16128367|ref|NP_414916.1| anti-RssB factor, RpoS stabilzer during Pi starvation; anti-adapter protein [Escherichia coli str. K-12 substr. MG1655]	-0.894418	-0.794603	-0.39852	-0.131015	-0.69023	-0.261082	-0.851871	-0.668024	-0.966899	-0.977028	-0.979005	-0.98624	-0.974738	-0.98152	-0.991097	0	0.425331	0.731132	0.7375	0.61234	0.543819	0.373814	0.346401	0.028779	0.023467	0.034475	0.01123	0.043431	0.024846	0.00812
>gi|49176017|ref|NP_414917.2| bacterial alkaline phosphatase [Escherichia coli str. K-12 substr. MG1655]	0.41487	-0.006268	-0.478759	-0.717807	-0.6997	-0.857386	-0.956091	-0.954237	-0.259311	-0.411035	-0.561642	-0.475914	-0.673976	-0.776949	-0.668046	0	0.568608	0.41114	0.168951	0.143547	0.042268	0.038156	0.024172	0.105617	0.190158	0.154903	0.364751	0.222961	0.170936	0.284745
>gi|162135895|ref|NP_414918.4| conserved protein, PsiF family, pho regulon [Escherichia coli str. K-12 substr. MG1655]	0.945127	-0.78004	-0.444229	-0.378484	-0.784724	-0.733031	-0.909782	-0.900589	-0.633318	-0.663935	-0.927394	-0.922699	-0.960839	-0.859136	-0.960375	0	0.275169	0.712981	0.646498	0.285181	0.25376	0.164505	0.134828	0.26587	0.417901	0.097298	0.084289	0.035682	0.186112	0.050038
>gi|16128370|ref|NP_414919.1| diguanylate cyclase for cellulose, biofilm, motility regulation [Escherichia coli str. K-12 substr. MG1655]	-0.705959	-0.999966	-0.999213	-0.994162	-0.999218	-0.997149	-0.999854	-0.999104	-0.204993	-0.697577	-0.7324	-0.876049	-0.951071	-0.954103	-0.955865	0	3e-05	0.001161	0.017724	0.001563	0.005778	0.00017	0.001011	0.39117	0.224508	0.202204	0.095291	0.045246	0.057861	0.045995
>gi|16128371|ref|NP_414920.1| pyrroline-5-carboxylate reductase, NAD(P)-binding [Escherichia coli str. K-12 substr. MG1655]	-0.964119	-0.999966	-0.999213	-0.994162	-0.999218	-0.997149	-0.999854	-0.999104	-0.204993	-0.697577	-0.7324	-0.876049	-0.951071	-0.954103	-0.955865	0	3e-05	0.001161	0.017724	0.001563	0.005778	0.00017	0.001011	0.39117	0.224508	0.202204	0.095291	0.045246	0.057861	0.045995
>gi|90111127|ref|NP_414921.2| conserved protein, UPF0178 family, downregulated by beryllium [Escherichia coli str. K-12 substr. MG1655]	-0.455262	-0.483882	-0.027809	-0.205881	-0.656683	-0.476472	-0.873989	-0.670277	-0.594284	-0.842227	-0.904257	-0.949563	-0.955816	-0.954254	-0.975753	0	0.515405	0.642181	0.477928	0.358135	0.381385	0.103493	0.209533	0.237875	0.126027	0.080734	0.051795	0.05461	0.062678	0.025629
>gi|16128373|ref|NP_414922.1| shikimate kinase II [Escherichia coli str. K-12 substr. MG1655]	-0.035592	-0.945936	-0.802285	-0.864069	-0.936844	-0.861425	-0.984325	-0.933853	0.076861	-0.1784	-0.521071	-0.556362	-0.737491	-0.705004	-0.856692	0	0.046344	0.184096	0.125104	0.111197	0.117008	0.015152	0.063815	0.522686	0.350339	0.342601	0.246421	0.132192	0.174051	0.097876
>gi|16128374|ref|NP_414923.1| predicted protein [Escherichia coli str. K-12 substr. MG1655]	0.162259	-0.446114	-0.833202	-0.69108	-0.839052	-0.845425	-0.988039	-0.885056	-0.896097	-0.759813	-0.974129	-0.988568	-0.982643	-0.979713	-0.989137	0	0.601835	0.214047	0.376964	0.413194	0.21059	0.018005	0.106771	0.090329	0.402242	0.028448	0.011872	0.020613	0.021262	0.011459
>gi|16128375|ref|NP_414924.1| conserved protein, AroM family; regulated by aroR [Escherichia coli str. K-12 substr. MG1655]	-0.997437	-0.993733	-0.993076	-0.943151	-0.982897	-0.99002	-0.999515	-0.993009	-0.70947	-0.698582	-0.713993	-0.820186	-0.949821	-0.961176	-0.980111	0	0.018209	0.010609	0.160196	0.042979	0.011557	0.001063	0.009301	0.310226	0.194095	0.475888	0.387665	0.078049	0.039088	0.026707
>gi|16128376|ref|NP_414925.1| conserved protein, UPF0345 family [Escherichia coli str. K-12 substr. MG1655]	0.81958	-0.989739	-0.997394	-0.987866	-0.99726	-0.997752	-0.999964	-0.98617	0.933427	0.912284	0.837226	0.54141	0.55136	0.681493	0.47263	0	0.028763	0.005291	0.033194	0.007101	0.003396	6.2e-05	0.021499	0.052154	0.118273	0.145741	0.513869	0.405588	0.192012	0.555066
>gi|16128378|ref|NP_414927.1| nucleoid-associated ssDNA and dsDNA binding protein; competitive inhibitor of RecA function [Escherichia coli str. K-12 substr. MG1655]	-0.668019	-0.957	-0.915456	-0.851636	-0.964973	-0.935303	-0.983266	-0.983712	-0.623528	-0.77763	-0.803895	-0.877836	-0.911969	-0.827159	-0.922442	0	0.06151	0.103394	0.177463	0.085612	0.062506	0.028812	0.018082	0.246101	0.180329	0.132452	0.111826	0.060172	0.157603	0.07262
>gi|90111128|ref|NP_414928.2| manno(fructo)kinase [Escherichia coli str. K-12 substr. MG1655]	-0.292205	-0.957	-0.915456	-0.851636	-0.964973	-0.935303	-0.983266	-0.983712	-0.623528	-0.77763	-0.803895	-0.877836	-0.911969	-0.827159	-0.922442	0	0.06151	0.103394	0.177463	0.085612	0.062506	0.028812	0.018082	0.246101	0.180329	0.132452	0.111826	0.060172	0.157603	0.07262
>gi|49176018|ref|NP_414930.3| predicted transporter [Escherichia coli str. K-12 substr. MG1655]	-0.992136	-0.999971	-0.999324	-0.994391	-0.999435	-0.988206	-0.9998	-0.99818	-0.083449	-0.651332	-0.758824	-0.829448	-0.887685	-0.892726	-0.938765	0	3.5e-05	0.001096	0.010014	0.001645	0.030649	0.000509	0.002914	0.534129	0.263496	0.213664	0.116836	0.133835	0.076876	0.065126
>gi|16128382|ref|NP_414931.1| exonuclease, dsDNA, ATP-dependent [Escherichia coli str. K-12 substr. MG1655]	-0.947897	-0.982696	-0.840448	-0.808148	-0.921656	-0.914115	-0.990063	-0.943096	-0.809327	-0.895955	-0.975366	-0.989275	-0.957121	-0.985545	-0.989741	0	0.02662	0.259683	0.384387	0.151004	0.097921	0.020636	0.078707	0.212793	0.166713	0.035499	0.016176	0.110191	0.032948	0.026285
>gi|16128383|ref|NP_414932.1| exonuclease, dsDNA, ATP-dependent [Escherichia coli str. K-12 substr. MG1655]	-0.930879	-0.99903	-0.997911	-0.988968	-0.997286	-0.997901	-0.999601	-0.998044	-0.714413	-0.647864	-0.888732	-0.954834	-0.973821	-0.984071	-0.976554	0	0.00132	0.003158	0.024917	0.00654	0.001517	0.00054	0.002417	0.439037	0.345551	0.124096	0.033519	0.037874	0.013782	0.027245
>gi|16128384|ref|NP_414933.1| DNA-binding response regulator in two-component regulatory system with PhoR (or CreC) [Escherichia coli str. K-12 substr. MG1655]	-0.986832	-0.99903	-0.997911	-0.988968	-0.997286	-0.997901	-0.999601	-0.998044	-0.714413	-0.647864	-0.888732	-0.954834	-0.973821	-0.984071	-0.976554	0	0.00132	0.003158	0.024917	0.00654	0.001517	0.00054	0.002417	0.439037	0.345551	0.124096	0.033519	0.037874	0.013782	0.027245
>gi|16128385|ref|NP_414934.1| sensory histidine kinase in two-component regulatory system with PhoB [Escherichia coli str. K-12 substr. MG1655]	-0.569859	-0.999922	-0.999122	-0.99023	-0.999279	-0.99763	-0.999806	-0.998311	-0.629602	-0.865984	-0.90831	-0.944674	-0.984159	-0.976632	-0.971846	0	0.000107	0.001289	0.029784	0.001952	0.003645	0.000256	0.002809	0.234445	0.083098	0.086493	0.077716	0.014862	0.037362	0.033978
>gi|16128386|ref|NP_414935.1| Branched-chain amino acid transport system 2 carrier protein; LIV-II transport system for Ile, Leu, and Val [Escherichia coli str. K-12 substr. MG1655]	-0.3503	-0.998301	-0.999429	-0.995067	-0.999254	-0.986315	-0.999869	-0.998631	-0.112891	-0.55227	-0.63157	-0.853341	-0.855963	-0.918539	-0.90623	0	0.004684	0.000538	0.00934	0.002062	0.03578	0.000187	0.001921	0.571604	0.280927	0.395914	0.130352	0.15242	0.094908	0.085986
>gi|16128387|ref|NP_414936.1| proline-specific permease [Escherichia coli str. K-12 substr. MG1655]	-0.955144	-0.999798	-0.999858	-0.997817	-0.999444	-0.997884	-0.999913	-0.999247	-0.10248	-0.437642	-0.627208	-0.86685	-0.899013	-0.87976	-0.954473	0	0.000614	0.000185	0.005708	0.001702	0.005346	0.000174	0.001149	0.65158	0.437088	0.351419	0.106533	0.137333	0.150035	0.03467
>gi|16128388|ref|NP_414937.1| maltodextrin glucosidase [Escherichia coli str. K-12 substr. MG1655]	-0.968772	-0.999559	-0.996911	-0.985384	-0.997548	-0.996436	-0.998033	-0.997341	-0.709423	-0.854233	-0.943316	-0.942784	-0.983676	-0.981803	-0.973182	0	0.000415	0.004947	0.036118	0.006098	0.002752	0.003804	0.003232	0.064372	0.113057	0.074203	0.072671	0.009527	0.018235	0.025803
>gi|16128389|ref|NP_414938.1| conserved protein [Escherichia coli str. K-12 substr. MG1655]	-0.845724	-0.998055	-0.994587	-0.976102	-0.997627	-0.994153	-0.997679	-0.996229	-0.844571	-0.906236	-0.953254	-0.971913	-0.986739	-0.99133	-0.992316	0	0.00326	0.006789	0.054839	0.00581	0.004598	0.004334	0.004581	0.088346	0.077517	0.074763	0.030536	0.021168	0.011506	0.008187
>gi|16128390|ref|NP_414939.1| S-adenosylmethionine:tRNA ribosyltransferase-isomerase [Escherichia coli str. K-12 substr. MG1655]	-0.829079	-0.504823	-0.553588	-0.390342	-0.829944	-0.755786	-0.898244	-0.934694	-0.708247	-0.749153	-0.865631	-0.910584	-0.926917	-0.917801	-0.965561	0	0.442769	0.286911	0.390277	0.166351	0.107984	0.083003	0.044873	0.181016	0.163477	0.101201	0.072703	0.046013	0.045534	0.025294
>gi|16128391|ref|NP_414940.1| tRNA-guanine transglycosylase [Escherichia coli str. K-12 substr. MG1655]	-0.753558	-0.995741	-0.989447	-0.945031	-0.986464	-0.964438	-0.993897	-0.988726	-0.415965	-0.613306	-0.639407	-0.716385	-0.765682	-0.678253	-0.818437	0	0.005228	0.00974	0.061508	0.037878	0.037432	0.006359	0.009355	0.181318	0.14366	0.337174	0.152313	0.178623	0.136601	0.133396
>gi|16128392|ref|NP_414941.1| SecYEG protein translocase auxillary subunit [Escherichia coli str. K-12 substr. MG1655]	-0.985907	-0.800808	-0.545091	-0.686006	-0.676145	-0.613953	-0.964781	-0.941311	-0.40795	-0.762665	-0.852698	-0.935339	-0.968707	-0.963509	-0.936341	0	0.21414	0.477638	0.413808	0.389514	0.275431	0.058084	0.051427	0.344121	0.178544	0.149633	0.037269	0.040114	0.035333	0.136961
>gi|16128393|ref|NP_414942.1| SecYEG protein translocase auxillary subunit [Escherichia coli str. K-12 substr. MG1655]	-0.697312	-0.890995	-0.834856	-0.841517	-0.924471	-0.826185	-0.979875	-0.976683	-0.427916	-0.711915	-0.862509	-0.940884	-0.954699	-0.962641	-0.964525	0	0.143088	0.10167	0.126051	0.070224	0.082086	0.014857	0.021137	0.273284	0.295175	0.197917	0.068065	0.081965	0.046546	0.046451
>gi|16128394|ref|NP_414943.1| SecYEG protein translocase auxillary subunit [Escherichia coli str. K-12 substr. MG1655]	-0.985686	-0.985011	-0.968384	-0.931739	-0.979816	-0.978587	-0.997663	-0.984729	0.330606	-0.039817	-0.344168	-0.366798	-0.539576	-0.685427	-0.740354	0	0.030472	0.033265	0.13694	0.040237	0.021715	0.001882	0.018391	0.31884	0.227768	0.23063	0.210233	0.147897	0.164719	0.147712
>gi|16128395|ref|NP_414944.1| conserved protein, HNH family [Escherichia coli str. K-12 substr. MG1655]	-0.499253	-0.999687	-0.999949	-0.998218	-0.998707	-0.999733	-0.999983	-0.999422	-0.897945	-0.859212	-0.907587	-0.960042	-0.959089	-0.964662	-0.983653	0	0.000727	0.000103	0.004697	0.004076	0.000508	2.5e-05	0.001174	0.092515	0.200986	0.084471	0.0445	0.038643	0.027393	0.019653
>gi|16128396|ref|NP_414945.1| nucleoside channel, receptor of phage T6 and colicin K [Escherichia coli str. K-12 substr. MG1655]	-0.867447	-0.998883	-0.999277	-0.987215	-0.997505	-0.998111	-0.999681	-0.996234	0.293122	0.094471	-0.27858	-0.46338	-0.664605	-0.565177	-0.78703	0	0.00097	0.000855	0.032854	0.004938	0.002602	0.000577	0.005273	0.652221	0.522114	0.722974	0.472223	0.287604	0.266582	0.227748
>gi|90111129|ref|NP_414946.4| predicted lipoprotein [Escherichia coli str. K-12 substr. MG1655]	-0.209947	-0.793427	-0.7458	-0.691595	-0.874041	-0.7661	-0.962748	-0.92272	-0.055479	-0.402739	-0.775801	-0.694742	-0.838306	-0.815165	-0.823026	0	0.20084	0.268377	0.386254	0.20554	0.140285	0.064524	0.073113	0.517422	0.419143	0.152986	0.175888	0.146491	0.14688	0.173729
>gi|16128398|ref|NP_414947.1| conserved protein [Escherichia coli str. K-12 substr. MG1655]	-0.892702	-0.968438	-0.920713	-0.825984	-0.962555	-0.835742	-0.965165	-0.952276	-0.782677	-0.86393	-0.702232	-0.883577	-0.934197	-0.943111	-0.952628	0	0.045087	0.099324	0.206515	0.093759	0.212886	0.064609	0.061054	0.18922	0.112716	0.481446	0.133431	0.074562	0.042206	0.065887
>gi|16128399|ref|NP_414948.1| fused diaminohydroxyphosphoribosylaminopyrimidine deaminase and 5-amino-6-(5-phosphoribosylamino) uracil reductase [Escherichia coli str. K-12 substr. MG1655]	-0.788715	-0.968438	-0.920713	-0.825984	-0.962555	-0.835742	-0.965165	-0.952276	-0.782677	-0.86393	-0.702232	-0.883577	-0.934197	-0.943111	-0.952628	0	0.045087	0.099324	0.206515	0.093759	0.212886	0.064609	0.061054	0.18922	0.112716	0.481446	0.133431	0.074562	0.042206	0.065887
>gi|16128400|ref|NP_414949.1| riboflavin synthase beta chain [Escherichia coli str. K-12 substr. MG1655]	-0.839697	-0.105773	-0.3069	-0.571771	-0.762947	-0.788071	-0.944515	-0.946106	-0.278012	-0.610726	-0.544528	-0.732413	-0.811511	-0.878188	-0.84134	0	0.509434	0.440527	0.300011	0.239958	0.135136	0.047183	0.046276	0.366832	0.193993	0.425174	0.088383	0.249259	0.139267	0.146241
>gi|16128401|ref|NP_414950.1| transcription antitermination protein [Escherichia coli str. K-12 substr. MG1655]	0.076518	-0.225644	0.106922	-0.002496	-0.394535	0.08576	-0.19065	-0.51089	-0.949261	-0.977853	-0.993406	-0.993833	-0.994193	-0.993436	-0.997999	0	0.709385	0.554604	0.357974	0.553918	0.436209	0.493524	0.357293	0.037719	0.023777	0.005797	0.006615	0.006764	0.010793	0.003049
>gi|16128402|ref|NP_414951.1| thiamin-monophosphate kinase [Escherichia coli str. K-12 substr. MG1655]	-0.97426	-0.998805	-0.997989	-0.982233	-0.994772	-0.994362	-0.999083	-0.997784	-0.015274	-0.049223	-0.295631	-0.344889	-0.694658	-0.66223	-0.735977	0	0.001206	0.002273	0.031096	0.015164	0.00871	0.001266	0.003348	0.307135	0.43235	0.335456	0.440605	0.147463	0.264041	0.11286
>gi|16128403|ref|NP_414952.1| phosphatidylglycerophosphatase A [Escherichia coli str. K-12 substr. MG1655]	-0.988529	-0.999999	-0.999998	-0.998741	-0.999974	-0.999955	-0.999995	-0.999953	0.127146	-0.362781	-0.362019	-0.751865	-0.715643	-0.890949	-0.914737	0	2e-06	2e-06	0.003966	8.2e-05	0.000124	1e-05	7.1e-05	0.708539	0.419602	0.47804	0.183086	0.330224	0.081206	0.104721
>gi|90111130|ref|NP_414953.2| 2-carboxybenzaldehyde reductase, function unknown [Escherichia coli str. K-12 substr. MG1655]	-0.238153	-0.981998	-0.957776	-0.936974	-0.981064	-0.969277	-0.993087	-0.985879	-0.46974	-0.592791	-0.732053	-0.736048	-0.885288	-0.884771	-0.909811	0	0.019008	0.031984	0.078136	0.037236	0.022255	0.007709	0.016432	0.197229	0.140486	0.143038	0.111548	0.049138	0.076806	0.051167
>gi|16128405|ref|NP_414954.1| 1-deoxyxylulose-5-phosphate synthase, thiamine-requiring, FAD-requiring [Escherichia coli str. K-12 substr. MG1655]	-0.984309	-0.993162	-0.991	-0.967115	-0.990031	-0.988271	-0.997899	-0.995636	-0.582413	-0.707584	-0.773774	-0.816849	-0.884801	-0.883315	-0.925575	0	0.005924	0.008012	0.04897	0.026306	0.010142	0.00144	0.005129	0.18734	0.129463	0.124308	0.078318	0.058974	0.073168	0.036289
>gi|16128406|ref|NP_414955.1| geranyltranstransferase [Escherichia coli str. K-12 substr. MG1655]	-0.968704	-0.924029	-0.932963	-0.729263	-0.920088	-0.92198	-0.980153	-0.985033	-0.93505	-0.928299	-0.970467	-0.977225	-0.986648	-0.979213	-0.98784	0	0.078921	0.068611	0.267776	0.154638	0.071199	0.037979	0.013299	0.050899	0.060827	0.032693	0.030064	0.010828	0.026444	0.018287
>gi|16128407|ref|NP_414956.1| exonuclease VII small subunit [Escherichia coli str. K-12 substr. MG1655]	0.245028	-0.755849	-0.381122	-0.177331	-0.660336	-0.384679	-0.971177	-0.691734	-0.799934	-0.91618	-0.944882	-0.964907	-0.946288	-0.913447	-0.983274	0	0.598256	0.77966	0.717335	0.627993	0.588683	0.041839	0.396125	0.186619	0.052707	0.049149	0.02338	0.067841	0.1025	0.015384
>gi|16128408|ref|NP_414957.1| tRNA s(4)U8 sulfurtransferase [Escherichia coli str. K-12 substr. MG1655]	-0.98757	-0.755849	-0.381122	-0.177331	-0.660336	-0.384679	-0.971177	-0.691734	-0.799934	-0.91618	-0.944882	-0.964907	-0.946288	-0.913447	-0.983274	0	0.598256	0.77966	0.717335	0.627993	0.588683	0.041839	0.396125	0.186619	0.052707	0.049149	0.02338	0.067841	0.1025	0.015384
>gi|90111131|ref|NP_414958.4| Oxidative-stress-resistance chaperone [Escherichia coli str. K-12 substr. MG1655]	-0.729661	-0.994237	-0.980373	-0.963225	-0.98979	-0.958669	-0.996209	-0.99155	-0.015298	-0.204087	-0.558654	-0.608043	-0.726304	-0.759756	-0.811818	0	0.007377	0.029449	0.062295	0.02934	0.066039	0.004751	0.009255	0.331651	0.365458	0.307652	0.164914	0.169011	0.127701	0.143647
>gi|16128410|ref|NP_414959.1| 2-dehydropantoate reductase, NADPH-specific [Escherichia coli str. K-12 substr. MG1655]	-0.781382	-0.999858	-0.999325	-0.996494	-0.998353	-0.998922	-0.999921	-0.999079	-0.281814	-0.404913	-0.48523	-0.744215	-0.892122	-0.953262	-0.931394	0	0.00018	0.000869	0.009699	0.005063	0.001404	9.3e-05	0.000931	0.417094	0.470778	0.481322	0.203773	0.109122	0.035179	0.06456
>gi|90111132|ref|NP_414960.2| Phi6 host factor; binds ATP and GTP [Escherichia coli str. K-12 substr. MG1655]	-0.03389	0.59773	0.414996	0.304031	0.299833	0.001945	-0.371204	-0.815285	-0.827467	-0.921064	-0.933997	-0.967542	-0.979314	-0.958565	-0.985809	0	0.432534	0.482913	0.420456	0.506832	0.322969	0.537851	0.133986	0.144786	0.061896	0.070884	0.020093	0.023281	0.048865	0.018956
>gi|90111133|ref|NP_414961.4| predicted transporter [Escherichia coli str. K-12 substr. MG1655]	-0.954489	-0.999657	-0.997859	-0.989006	-0.998407	-0.991543	-0.999819	-0.997682	-0.168479	-0.663496	-0.748638	-0.888583	-0.923483	-0.933252	-0.938774	0	0.000877	0.003266	0.027404	0.004416	0.018939	0.000193	0.003188	0.517953	0.164457	0.203019	0.059308	0.102601	0.064327	0.048923
>gi|16128413|ref|NP_414962.1| protoheme IX farnesyltransferase [Escherichia coli str. K-12 substr. MG1655]	-0.998989	-0.999933	-0.99933	-0.99515	-0.999379	-0.985627	-0.999532	-0.998753	-0.393349	-0.650187	-0.843064	-0.891058	-0.963768	-0.921126	-0.9597	0	9.3e-05	0.000692	0.012561	0.001671	0.032291	0.000652	0.001578	0.464894	0.27581	0.130038	0.098502	0.033806	0.102154	0.053255
>gi|16128414|ref|NP_414963.1| cytochrome o ubiquinol oxidase subunit IV [Escherichia coli str. K-12 substr. MG1655]	-0.889574	-0.999959	-0.999781	-0.997289	-0.999735	-0.999733	-0.999779	-0.999589	0.381927	0.378602	-0.273213	-0.349688	-0.380899	-0.383104	-0.672248	0	9.5e-05	0.000395	0.008444	0.000779	0.000467	0.000587	0.000595	0.738272	0.666833	0.655804	0.433616	0.560116	0.550005	0.261932
>gi|16128415|ref|NP_414964.1| cytochrome o ubiquinol oxidase subunit III [Escherichia coli str. K-12 substr. MG1655]	-0.966152	-0.99152	-0.999974	-0.998791	-0.999959	-0.999923	-0.999992	-0.999754	0.199674	0.06715	-0.290114	-0.594852	-0.592003	-0.616872	-0.832364	0	0.02681	3.3e-05	0.003412	0.000122	0.000154	1.6e-05	0.000399	0.636483	0.581901	0.472296	0.360937	0.365702	0.194026	0.167397
>gi|16128416|ref|NP_414965.1| cytochrome o ubiquinol oxidase subunit I [Escherichia coli str. K-12 substr. MG1655]	-0.997139	-0.998178	-0.999515	-0.995098	-0.999355	-0.998006	-0.999808	-0.998529	0.173133	-0.220501	-0.601189	-0.745093	-0.77269	-0.787348	-0.910957	0	0.004622	0.000967	0.012539	0.001792	0.003851	0.000381	0.001973	0.619681	0.484087	0.209809	0.220369	0.140509	0.127006	0.085852
>gi|16128417|ref|NP_414966.1| cytochrome o ubiquinol oxidase subunit II [Escherichia coli str. K-12 substr. MG1655]	-0.69382	-0.980821	-0.991375	-0.974719	-0.990818	-0.994243	-0.99911	-0.997423	-0.366367	-0.623559	-0.765957	-0.842135	-0.942556	-0.910784	-0.943144	0	0.024873	0.008876	0.047572	0.012595	0.005128	0.001085	0.003017	0.367523	0.262473	0.164767	0.108889	0.054328	0.027841	0.034962
>gi|16128418|ref|NP_414967.1| muropeptide transporter [Escherichia coli str. K-12 substr. MG1655]	-0.980143	-0.999722	-0.996627	-0.985565	-0.999131	-0.984999	-0.999465	-0.997196	-0.013281	-0.488831	-0.662439	-0.755389	-0.820137	-0.89755	-0.894917	0	0.000485	0.00505	0.032561	0.002357	0.034827	0.000809	0.004229	0.554815	0.313116	0.27043	0.174778	0.155281	0.075863	0.095373
>gi|90111134|ref|NP_414968.4| predicted lipoprotein [Escherichia coli str. K-12 substr. MG1655]	0.647489	0.436267	0.375249	0.297206	-0.091256	0.191488	-0.417433	-0.707513	-0.389495	-0.619471	-0.793756	-0.946888	-0.934595	-0.980191	-0.987618	0	0.427353	0.454495	0.518743	0.624962	0.347278	0.412468	0.299608	0.356545	0.349199	0.506208	0.079866	0.17323	0.02177	0.016336
>gi|90111135|ref|NP_414969.4| stationary-phase morphogene, transcriptional repressor for mreB; also regulator for dacA, dacC, and ampC [Escherichia coli str. K-12 substr. MG1655]	-0.738632	-0.999244	-0.998483	-0.988551	-0.998837	-0.99768	-0.99965	-0.996545	-0.772173	-0.798587	-0.795243	-0.908168	-0.961295	-0.951329	-0.981277	0	0.00079	0.001164	0.026667	0.002529	0.001901	0.00049	0.004926	0.229674	0.125079	0.199857	0.084923	0.042695	0.040181	0.02049
>gi|16128421|ref|NP_414970.1| peptidyl-prolyl cis/trans isomerase (trigger factor) [Escherichia coli str. K-12 substr. MG1655]	-0.818854	-0.999244	-0.998483	-0.988551	-0.998837	-0.99768	-0.99965	-0.996545	-0.772173	-0.798587	-0.795243	-0.908168	-0.961295	-0.951329	-0.981277	0	0.00079	0.001164	0.026667	0.002529	0.001901	0.00049	0.004926	0.229674	0.125079	0.199857	0.084923	0.042695	0.040181	0.02049
>gi|16128422|ref|NP_414971.1| proteolytic subunit of ClpA-ClpP and ClpX-ClpP ATP-dependent serine proteases [Escherichia coli str. K-12 substr. MG1655]	-0.919652	-0.988607	-0.970007	-0.912009	-0.958143	-0.97664	-0.998158	-0.979363	-0.601885	-0.572336	-0.785251	-0.839466	-0.858916	-0.817515	-0.916254	0	0.024478	0.031005	0.121834	0.107348	0.019886	0.001852	0.033203	0.251205	0.113382	0.165744	0.086719	0.073034	0.072181	0.078933
>gi|16128423|ref|NP_414972.1| ATPase and specificity subunit of ClpX-ClpP ATP-dependent serine protease [Escherichia coli str. K-12 substr. MG1655]	-0.968547	-0.84781	-0.882976	-0.83665	-0.888654	-0.883253	-0.95237	-0.979121	-0.728737	-0.807218	-0.889723	-0.905301	-0.938741	-0.897838	-0.950661	0	0.104647	0.09374	0.106027	0.133889	0.069736	0.038625	0.017427	0.192019	0.093028	0.087911	0.077025	0.029519	0.031765	0.042558
>gi|16128424|ref|NP_414973.1| DNA-binding ATP-dependent protease La [Escherichia coli str. K-12 substr. MG1655]	-0.993276	-0.748391	-0.644621	-0.623821	-0.846379	-0.733602	-0.925954	-0.93325	-0.845148	-0.882594	-0.946218	-0.965645	-0.973568	-0.966683	-0.986955	0	0.244247	0.253023	0.319836	0.266424	0.137115	0.081746	0.051016	0.083213	0.135242	0.034039	0.03136	0.020365	0.020175	0.015855
>gi|16128425|ref|NP_414974.1| HU, DNA-binding transcriptional regulator, beta subunit [Escherichia coli str. K-12 substr. MG1655]	0.757195	-0.169172	-0.764119	-0.730502	-0.797642	-0.722547	-0.971391	-0.983999	-0.618064	-0.841851	-0.645241	-0.835601	-0.965189	-0.957771	-0.9614	0	0.595933	0.21365	0.207963	0.196841	0.174919	0.02182	0.018985	0.310321	0.21058	0.59563	0.409042	0.060814	0.070906	0.063906
>gi|16128426|ref|NP_414975.1| periplasmic folding chaperone, has an inactive PPIase domain [Escherichia coli str. K-12 substr. MG1655]	0.834603	0.823315	0.477489	0.674717	0.14082	0.308099	-0.105172	-0.380071	-0.828329	-0.894668	-0.96452	-0.954584	-0.976454	-0.968046	-0.981994	0	0.197252	0.601578	0.23263	0.622327	0.556431	0.519585	0.246513	0.104622	0.083333	0.027359	0.037967	0.021784	0.034585	0.025432
>gi|16128427|ref|NP_414976.1| conserved protein, ComEA homolog [Escherichia coli str. K-12 substr. MG1655]	0.095298	-0.942745	-0.939358	-0.948842	-0.969581	-0.965278	-0.998414	-0.989199	-0.807985	-0.793601	-0.767414	-0.941453	-0.971925	-0.907097	-0.978671	0	0.091764	0.130119	0.096444	0.052879	0.038838	0.00236	0.0125	0.118162	0.295104	0.300606	0.073249	0.037065	0.220262	0.021199
>gi|16128428|ref|NP_414977.1| long-chain acyl-CoA thioesterase III [Escherichia coli str. K-12 substr. MG1655]	-0.977521	-0.847615	-0.683803	-0.706184	-0.859235	-0.753207	-0.914117	-0.900927	-0.635934	-0.802831	-0.879759	-0.956669	-0.976756	-0.971688	-0.98027	0	0.187855	0.20415	0.239204	0.164257	0.100124	0.078468	0.090924	0.264678	0.128593	0.151516	0.032879	0.021318	0.030163	0.02138
>gi|16128429|ref|NP_414978.1| required for 7-cyano-7-deazaguanine (preQ0) synthesis [Escherichia coli str. K-12 substr. MG1655]	-0.622313	-0.847615	-0.683803	-0.706184	-0.859235	-0.753207	-0.914117	-0.900927	-0.635934	-0.802831	-0.879759	-0.956669	-0.976756	-0.971688	-0.98027	0	0.187855	0.20415	0.239204	0.164257	0.100124	0.078468	0.090924	0.264678	0.128593	0.151516	0.032879	0.021318	0.030163	0.02138
>gi|16128430|ref|NP_414979.1| predicted transporter subunit: periplasmic-binding component of ABC superfamily [Escherichia coli str. K-12 substr. MG1655]	-0.942928	-0.999988	-0.999634	-0.99409	-0.999543	-0.999701	-0.999919	-0.999433	-0.591765	-0.762192	-0.846909	-0.895106	-0.927006	-0.981302	-0.920646	0	1.1e-05	0.000838	0.01792	0.001377	0.000326	0.000118	0.000796	0.420327	0.195175	0.178819	0.193246	0.163137	0.021964	0.081046
>gi|90111136|ref|NP_414980.2| thiamin pyrimidine pyrophosphate hydrolase; HMP-PP phosphatase [Escherichia coli str. K-12 substr. MG1655]	-0.993616	-0.999992	-0.999958	-0.996216	-0.999041	-0.999756	-0.99999	-0.999516	-0.755623	-0.728282	-0.825961	-0.888616	-0.899716	-0.904029	-0.935038	0	1.1e-05	3.3e-05	0.01039	0.00299	0.000403	1.5e-05	0.000788	0.205672	0.24695	0.121753	0.094229	0.073448	0.076034	0.069248
>gi|90111137|ref|NP_414981.4| predicted DNA-binding transcriptional regulator [Escherichia coli str. K-12 substr. MG1655]	-0.853333	-0.956014	-0.817502	-0.83701	-0.940397	-0.82257	-0.907022	-0.915553	0.165408	-0.134193	-0.361905	-0.472631	-0.558708	-0.498953	-0.605796	0	0.03865	0.174792	0.119121	0.103973	0.181856	0.066851	0.087918	0.439464	0.369562	0.401238	0.469748	0.245538	0.205458	0.334547
>gi|16128433|ref|NP_414982.1| fused predicted multidrug transporter subunits of ABC superfamily: ATP-binding components [Escherichia coli str. K-12 substr. MG1655]	-0.887533	-0.997006	-0.977525	-0.949741	-0.988293	-0.982533	-0.996377	-0.989258	-0.629163	-0.701215	-0.893561	-0.941421	-0.971358	-0.971918	-0.95989	0	0.004902	0.02452	0.081531	0.021204	0.015449	0.004045	0.011211	0.139538	0.306498	0.070804	0.030394	0.02223	0.025397	0.041272
>gi|16128434|ref|NP_414983.1| fused predicted multidrug transporter subunits of ABC superfamily: ATP-binding components [Escherichia coli str. K-12 substr. MG1655]	-0.667222	-0.948072	-0.693602	-0.744887	-0.92174	-0.805335	-0.95801	-0.912263	-0.440751	-0.717637	-0.857102	-0.907324	-0.94088	-0.950353	-0.928777	0	0.06832	0.392434	0.226313	0.109969	0.129007	0.044192	0.072415	0.215065	0.124383	0.092273	0.051261	0.056233	0.035401	0.063894
>gi|16128435|ref|NP_414984.1| nitrogen assimilation regulatory protein for GlnL, GlnE, and AmtB [Escherichia coli str. K-12 substr. MG1655]	-0.994182	-0.658122	-0.379484	-0.377253	-0.351532	-0.54901	-0.717537	-0.867035	-0.834652	-0.885166	-0.952306	-0.964714	-0.983445	-0.97437	-0.98112	0	0.333691	0.497679	0.414909	0.675696	0.277165	0.253283	0.098552	0.115486	0.111041	0.048364	0.040164	0.01546	0.015254	0.027318
>gi|16128436|ref|NP_414985.1| ammonium transporter [Escherichia coli str. K-12 substr. MG1655]	-0.969491	-0.999231	-0.999704	-0.996659	-0.999491	-0.996484	-0.999953	-0.999219	0.311484	-0.240066	-0.382431	-0.570583	-0.619784	-0.791485	-0.793537	0	0.002333	0.000483	0.008439	0.001523	0.009049	6.3e-05	0.001181	0.591596	0.384992	0.483128	0.267782	0.186242	0.099324	0.138586
>gi|16128437|ref|NP_414986.1| acyl-CoA thioesterase II [Escherichia coli str. K-12 substr. MG1655]	-0.393558	-0.997024	-0.996302	-0.971925	-0.996381	-0.995071	-0.998543	-0.997124	-0.888705	-0.892915	-0.945499	-0.962631	-0.984969	-0.98059	-0.975467	0	0.00294	0.003416	0.057166	0.00697	0.003758	0.001511	0.003585	0.077663	0.06974	0.059997	0.030106	0.013315	0.019162	0.027759
>gi|49176025|ref|NP_414987.3| outer membrane lipoprotein [Escherichia coli str. K-12 substr. MG1655]	-0.620404	-0.825752	-0.889689	-0.849419	-0.741445	-0.756553	-0.988065	-0.966749	-0.236018	-0.428718	-0.77586	-0.804891	-0.790041	-0.795836	-0.927243	0	0.213302	0.158483	0.187926	0.454508	0.428616	0.018579	0.036685	0.46006	0.489559	0.367352	0.265318	0.393612	0.55504	0.093464
>gi|16128439|ref|NP_414988.1| binds and enhances nucleotide excision repair of O(6)-alkylguanine; degenerate cysteine methyltransferase homolog [Escherichia coli str. K-12 substr. MG1655]	-0.421033	-0.825752	-0.889689	-0.849419	-0.741445	-0.756553	-0.988065	-0.966749	-0.236018	-0.428718	-0.77586	-0.804891	-0.790041	-0.795836	-0.927243	0	0.213302	0.158483	0.187926	0.454508	0.428616	0.018579	0.036685	0.46006	0.489559	0.367352	0.265318	0.393612	0.55504	0.093464
>gi|16128440|ref|NP_414989.1| conserved protein, DUF1428 family [Escherichia coli str. K-12 substr. MG1655]	-0.98654	-0.284826	-0.403805	-0.192478	-0.699997	-0.344063	-0.970009	-0.605726	0.040554	-0.058243	0.113323	-0.362872	-0.452612	-0.247113	-0.342403	0	0.892646	0.726391	0.702402	0.610422	0.545982	0.041498	0.450561	0.5441	0.355415	0.485933	0.461176	0.504712	0.53068	0.618393
>gi|90111138|ref|NP_414990.2| predicted cyclic-di-GMP phosphodiesterase [Escherichia coli str. K-12 substr. MG1655]	-0.936378	-0.999838	-0.999781	-0.994319	-0.998847	-0.999571	-0.999967	-0.999397	-0.552569	-0.533457	-0.544877	-0.740821	-0.911353	-0.979625	-0.897241	0	0.000307	0.000345	0.016764	0.00341	0.000413	4.2e-05	0.000811	0.383177	0.374228	0.602887	0.372889	0.20438	0.012876	0.133637
>gi|90111139|ref|NP_414991.4| inner membrane protein, DUF1449 family [Escherichia coli str. K-12 substr. MG1655]	0.231642	-0.844808	-0.817209	-0.834064	-0.911284	-0.707138	-0.978467	-0.918546	-0.452371	-0.740711	-0.870297	-0.925841	-0.955866	-0.898062	-0.958843	0	0.237377	0.280246	0.157258	0.137201	0.25095	0.026442	0.080791	0.368166	0.209429	0.071932	0.048582	0.055786	0.087348	0.046412
>gi|16128443|ref|NP_414992.1| maltose O-acetyltransferase [Escherichia coli str. K-12 substr. MG1655]	-0.428878	-0.993396	-0.983154	-0.976659	-0.989423	-0.961207	-0.995531	-0.987912	-0.447881	-0.717505	-0.81241	-0.867297	-0.935678	-0.922754	-0.966816	0	0.006117	0.020382	0.02622	0.022726	0.029062	0.006625	0.01056	0.229146	0.133586	0.193592	0.0827	0.051464	0.087145	0.020269
>gi|16128444|ref|NP_414993.1| modulator of gene expression, with H-NS [Escherichia coli str. K-12 substr. MG1655]	-0.750834	-0.88104	-0.826334	-0.876255	-0.942027	-0.840039	-0.953263	-0.921346	-0.850028	-0.948866	-0.967445	-0.979611	-0.981344	-0.97351	-0.986993	0	0.141776	0.205152	0.099739	0.122815	0.144124	0.069116	0.082118	0.170957	0.046608	0.037124	0.019584	0.031499	0.027736	0.022005
>gi|16128445|ref|NP_414994.1| Hha toxicity attenuator; conjugation-related protein [Escherichia coli str. K-12 substr. MG1655]	-0.77723	-0.950581	-0.999277	-0.991536	-0.996156	-0.997563	-0.999898	-0.99662	-0.5221	-0.704852	-0.818225	-0.806627	-0.886625	-0.819038	-0.950703	0	0.080862	0.000781	0.009715	0.007742	0.0026	0.000128	0.007597	0.208248	0.232766	0.200469	0.291285	0.122071	0.232587	0.066852
>gi|16128446|ref|NP_414995.1| multidrug efflux system protein [Escherichia coli str. K-12 substr. MG1655]	0.387905	0.105242	-0.037892	-0.193786	-0.417866	-0.42397	-0.835845	-0.78151	0.269329	-0.154294	-0.468422	-0.491716	-0.640252	-0.719639	-0.705351	0	0.409956	0.406162	0.261487	0.384325	0.2057	0.09121	0.099353	0.313262	0.268745	0.225646	0.221612	0.133895	0.078228	0.104131
>gi|16128447|ref|NP_414996.1| multidrug efflux system [Escherichia coli str. K-12 substr. MG1655]	-0.677912	-0.237665	-0.357459	-0.378665	-0.493874	-0.258683	-0.789326	-0.819025	-0.424908	-0.641538	-0.831664	-0.818543	-0.897194	-0.897727	-0.901379	0	0.510918	0.500743	0.327129	0.609767	0.522071	0.296977	0.142233	0.290772	0.283666	0.287834	0.246532	0.169894	0.24493	0.148918
>gi|16128448|ref|NP_414997.1| DNA-binding transcriptional repressor [Escherichia coli str. K-12 substr. MG1655]	-0.984416	-0.998043	-0.989886	-0.969662	-0.988259	-0.985989	-0.998213	-0.988895	-0.764679	-0.88405	-0.880616	-0.9464	-0.960925	-0.945778	-0.972721	0	0.002531	0.009904	0.056717	0.031026	0.012635	0.0031	0.017014	0.2126	0.078249	0.132305	0.039942	0.037814	0.045266	0.029466
>gi|16128449|ref|NP_414998.1| fused conserved protein [Escherichia coli str. K-12 substr. MG1655]	-0.838278	-0.977976	-0.791026	-0.873331	-0.920922	-0.89112	-0.974819	-0.977757	-0.590833	-0.815153	-0.906762	-0.977153	-0.988084	-0.987068	-0.976032	0	0.021624	0.200476	0.129977	0.084878	0.07136	0.025101	0.016283	0.26487	0.16511	0.118987	0.023691	0.010834	0.012941	0.037864
>gi|16128450|ref|NP_414999.1| predicted protein [Escherichia coli str. K-12 substr. MG1655]	-0.757232	0.167113	0.388025	0.373749	-0.209122	0.324587	-0.321076	-0.482283	-0.868318	-0.861039	-0.952582	-0.979407	-0.975122	-0.976131	-0.985471	0	0.693601	0.611572	0.518749	0.803564	0.591632	0.520967	0.427676	0.168798	0.16779	0.060512	0.020373	0.0298	0.026206	0.012082
>gi|16128451|ref|NP_415000.1| primosomal replication protein N'' [Escherichia coli str. K-12 substr. MG1655]	-0.998612	-0.999854	-0.994615	-0.964096	-0.997368	-0.997876	-0.9994	-0.99497	-0.890903	-0.970329	-0.916321	-0.995964	-0.979097	-0.99744	-0.998563	0	0.00017	0.010545	0.103608	0.00443	0.002427	0.001523	0.006116	0.172342	0.043911	0.186398	0.009855	0.056646	0.004418	0.002354
>gi|16128452|ref|NP_415001.1| inner membrane protein, DUF454 family [Escherichia coli str. K-12 substr. MG1655]	-0.999917	-0.999989	-0.999842	-0.991005	-0.999866	-0.999246	-0.99994	-0.999893	-0.526725	-0.727832	-0.437822	-0.84283	-0.994376	-0.937439	-0.967388	0	2.8e-05	0.000422	0.028424	0.000418	0.002181	0.000142	0.000145	0.383405	0.225801	0.767467	0.324464	0.007117	0.104856	0.056213
>gi|16128453|ref|NP_415002.1| adenine phosphoribosyltransferase [Escherichia coli str. K-12 substr. MG1655]	-0.984032	-0.343539	-0.350455	-0.304009	-0.681259	-0.503943	-0.726156	-0.867958	-0.155285	-0.268002	-0.703381	-0.582628	-0.744869	-0.732072	-0.701284	0	0.562013	0.350631	0.402538	0.313417	0.293755	0.281981	0.087275	0.232366	0.452141	0.181885	0.236087	0.132144	0.164223	0.187269
>gi|16128454|ref|NP_415003.1| DNA polymerase III/DNA elongation factor III, tau and gamma subunits [Escherichia coli str. K-12 substr. MG1655]	-0.7401	-0.973253	-0.896868	-0.820618	-0.940873	-0.924838	-0.994302	-0.962522	-0.925922	-0.953808	-0.965314	-0.991203	-0.992545	-0.990693	-0.996149	0	0.050239	0.115088	0.191252	0.115685	0.055765	0.004569	0.026866	0.056091	0.047216	0.038739	0.010524	0.006858	0.010835	0.005628
>gi|16128455|ref|NP_415004.1| conserved protein [Escherichia coli str. K-12 substr. MG1655]	-0.055732	-0.728715	-0.458125	-0.395376	-0.787646	-0.726252	-0.992522	-0.702987	-0.127423	-0.024835	-0.385272	-0.563187	-0.292185	-0.057002	-0.309421	0	0.61048	0.700332	0.712663	0.425685	0.272689	0.009077	0.300387	0.437803	0.443514	0.655975	0.258767	0.355256	0.620189	0.558708
>gi|16128456|ref|NP_415005.1| gap repair protein [Escherichia coli str. K-12 substr. MG1655]	-0.930627	-0.999783	-0.996284	-0.989888	-0.995303	-0.995759	-0.999538	-0.993828	-0.389277	-0.292508	-0.608992	-0.643296	-0.631872	-0.510421	-0.751499	0	0.000195	0.004923	0.015427	0.013544	0.004211	0.001103	0.011315	0.43593	0.207151	0.365445	0.246431	0.165011	0.209961	0.274434
>gi|16128457|ref|NP_415006.1| molecular chaperone HSP90 family [Escherichia coli str. K-12 substr. MG1655]	-0.679737	-0.08301	-0.341561	-0.375	-0.515702	-0.773684	-0.886209	-0.92641	-0.546296	-0.757286	-0.838541	-0.874801	-0.924783	-0.903549	-0.936844	0	0.365305	0.30159	0.378113	0.408935	0.106366	0.077152	0.052384	0.217131	0.149644	0.112785	0.084926	0.04428	0.059294	0.059612
>gi|16128458|ref|NP_415007.1| adenylate kinase [Escherichia coli str. K-12 substr. MG1655]	-0.991586	0.268435	0.523747	0.366126	0.316675	0.165262	-0.232619	-0.476835	-0.758017	-0.804114	-0.900038	-0.917073	-0.940771	-0.922148	-0.955932	0	0.626408	0.297356	0.384226	0.499404	0.329333	0.336573	0.174339	0.126854	0.171381	0.081042	0.086679	0.026996	0.042238	0.044411
>gi|16128459|ref|NP_415008.1| ferrochelatase [Escherichia coli str. K-12 substr. MG1655]	-0.125332	-0.996296	-0.965883	-0.955766	-0.983197	-0.971944	-0.995436	-0.981186	-0.660642	-0.801859	-0.876311	-0.90601	-0.942838	-0.943178	-0.962446	0	0.005754	0.042979	0.059677	0.044453	0.029793	0.006736	0.023692	0.206396	0.105728	0.063362	0.050971	0.048988	0.062009	0.018678
>gi|16128460|ref|NP_415009.1| acetyl esterase [Escherichia coli str. K-12 substr. MG1655]	-0.676264	-0.970473	-0.943705	-0.86788	-0.961153	-0.928989	-0.983016	-0.959736	-0.206406	-0.39655	-0.705224	-0.706626	-0.780324	-0.685118	-0.765943	0	0.039732	0.061271	0.139161	0.07701	0.072477	0.023067	0.030977	0.412808	0.325055	0.258545	0.158235	0.092549	0.160404	0.121442
>gi|16128461|ref|NP_415010.1| inosine/guanosine kinase [Escherichia coli str. K-12 substr. MG1655]	-0.285071	-0.960836	-0.986206	-0.970087	-0.988857	-0.988893	-0.99785	-0.994092	-0.447597	-0.633556	-0.704475	-0.740022	-0.875541	-0.866335	-0.904743	0	0.047226	0.016018	0.028579	0.015147	0.004535	0.001596	0.005469	0.123235	0.141972	0.187619	0.105686	0.069766	0.066302	0.038839
>gi|16128462|ref|NP_415011.1| predicted transporter with NAD(P)-binding Rossmann-fold domain [Escherichia coli str. K-12 substr. MG1655]	-0.999837	-0.960836	-0.986206	-0.970087	-0.988857	-0.988893	-0.99785	-0.994092	-0.447597	-0.633556	-0.704475	-0.740022	-0.875541	-0.866335	-0.904743	0	0.047226	0.016018	0.028579	0.015147	0.004535	0.001596	0.005469	0.123235	0.141972	0.187619	0.105686	0.069766	0.066302	0.038839
>gi|16128463|ref|NP_415012.1| predicted fosmidomycin efflux system [Escherichia coli str. K-12 substr. MG1655]	-0.987034	-0.999985	-0.999589	-0.997128	-0.999577	-0.998158	-0.999962	-0.999562	-0.501765	-0.783602	-0.851105	-0.932347	-0.936839	-0.942281	-0.959069	0	2.6e-05	0.000973	0.007476	0.001281	0.004457	9.9e-05	0.000641	0.382391	0.159656	0.109534	0.054493	0.109873	0.073216	0.035991
>gi|16128464|ref|NP_415013.1| bifunctional UDP-sugar hydrolase/5'-nucleotidase [Escherichia coli str. K-12 substr. MG1655]	-0.216064	0.629236	0.387421	0.174159	0.265882	-0.18942	-0.217166	-0.552153	-0.280373	-0.512935	-0.762322	-0.719005	-0.867786	-0.847015	-0.856237	0	0.158677	0.16776	0.212712	0.327462	0.270716	0.396293	0.348313	0.144258	0.198335	0.116358	0.094182	0.027356	0.046565	0.043995
>gi|16128465|ref|NP_415014.1| conserved protein [Escherichia coli str. K-12 substr. MG1655]	-0.996196	-0.585357	-0.631384	-0.690371	-0.740153	-0.536517	-0.936704	-0.931792	-0.939478	-0.942313	-0.975118	-0.985325	-0.992813	-0.988193	-0.994379	0	0.54964	0.330382	0.36256	0.266812	0.367048	0.048972	0.065314	0.037409	0.048914	0.032447	0.01528	0.008427	0.020079	0.005937
>gi|16128466|ref|NP_415015.1| GumN family protein [Escherichia coli str. K-12 substr. MG1655]	-0.949771	-0.999311	-0.996166	-0.964114	-0.99317	-0.99749	-0.999631	-0.997467	-0.803137	-0.858754	-0.860412	-0.961257	-0.961467	-0.990898	-0.985809	0	0.001441	0.004538	0.100389	0.018526	0.002966	0.000725	0.002935	0.118326	0.102449	0.229051	0.040196	0.092844	0.009799	0.013914
>gi|90111140|ref|NP_415016.4| predicted DNA-binding transcriptional regulator [Escherichia coli str. K-12 substr. MG1655]	-0.787726	0.812423	0.679718	0.645076	0.613285	0.393477	0.11195	0.029472	-0.688968	-0.864359	-0.889783	-0.954283	-0.966678	-0.956661	-0.981224	0	0.197986	0.5725	0.27992	0.4163	0.31255	0.454532	0.380743	0.246575	0.123952	0.144929	0.03377	0.02741	0.045586	0.021612
>gi|16128468|ref|NP_415017.1| copper transporter [Escherichia coli str. K-12 substr. MG1655]	-0.286552	-0.966642	-0.897016	-0.867105	-0.964024	-0.944015	-0.994841	-0.97711	-0.355207	-0.617595	-0.779557	-0.82295	-0.912288	-0.919474	-0.919527	0	0.039077	0.11059	0.185568	0.066274	0.047655	0.004829	0.019939	0.246943	0.197661	0.111971	0.096464	0.058148	0.064879	0.059772
>gi|16128469|ref|NP_415018.1| glutaminase [Escherichia coli str. K-12 substr. MG1655]	0.349995	-0.951687	-0.867943	-0.910366	-0.966535	-0.941277	-0.989098	-0.977299	0.084337	-0.322313	-0.56256	-0.508946	-0.75082	-0.796543	-0.686641	0	0.032223	0.172228	0.095939	0.059533	0.036786	0.011063	0.01928	0.273902	0.359035	0.209466	0.181458	0.09896	0.103733	0.160588
>gi|16128470|ref|NP_415019.1| predicted transporter [Escherichia coli str. K-12 substr. MG1655]	-0.97929	-0.999883	-0.999394	-0.994263	-0.999254	-0.995232	-0.999957	-0.999026	-0.292059	-0.700637	-0.755031	-0.895355	-0.918835	-0.923248	-0.944993	0	0.00025	0.000849	0.016276	0.002233	0.012225	5.1e-05	0.001468	0.513963	0.186751	0.204664	0.063818	0.093877	0.098724	0.038267
>gi|16128471|ref|NP_415020.1| DNA-binding transcriptional activator of copper-responsive regulon genes [Escherichia coli str. K-12 substr. MG1655]	-0.738664	-0.998444	-0.995983	-0.991958	-0.996024	-0.996468	-0.999732	-0.997526	-0.891157	-0.864142	-0.944303	-0.966814	-0.97009	-0.953678	-0.983965	0	0.001423	0.004094	0.011743	0.011495	0.002957	0.00036	0.003726	0.094838	0.168768	0.056863	0.033501	0.035848	0.043683	0.017837
>gi|145698226|ref|NP_415021.2| inner membrane protein that stimulates the ftsH htpX mutant suppressor activity of QmcA [Escherichia coli str. K-12 substr. MG1655]	-0.054679	-1	-0.999996	-0.98324	-0.999972	-0.999971	-0.999998	-0.999896	0.185486	-0.111088	-0.241773	-0.581781	-0.625741	-0.918229	-0.868552	0	0	7e-06	0.052999	8.4e-05	5.8e-05	4e-06	0.000181	0.660771	0.565174	0.677965	0.407794	0.500391	0.089449	0.127478
>gi|16128473|ref|NP_415022.1| multicopy suppressor of ftsH htpX double mutant; membrane-anchored predicted protease with C-terminal cytoplasmic PHB domain [Escherichia coli str. K-12 substr. MG1655]	0.065691	-0.042371	0.109196	0.066994	-0.367382	-0.27683	-0.817006	-0.758179	-0.60549	-0.816079	-0.906172	-0.943031	-0.954095	-0.954097	-0.981497	0	0.476093	0.532376	0.339572	0.380613	0.377759	0.179221	0.175577	0.263883	0.1583	0.064995	0.043472	0.053894	0.031081	0.019806
>gi|16128474|ref|NP_415023.1| predicted transporter subunit: ATP-binding component of ABC superfamily [Escherichia coli str. K-12 substr. MG1655]	-0.802718	-0.755675	-0.883747	-0.864288	-0.931677	-0.936611	-0.984445	-0.984555	-0.505307	-0.639198	-0.777226	-0.840556	-0.915492	-0.928633	-0.944983	0	0.22062	0.109949	0.086764	0.061628	0.042016	0.018313	0.013273	0.15947	0.209708	0.202358	0.146487	0.101627	0.045225	0.039672
>gi|90111141|ref|NP_415024.4| inner membrane protein, UPF0014 family [Escherichia coli str. K-12 substr. MG1655]	-0.96956	-0.998958	-0.991849	-0.993944	-0.996817	-0.995817	-0.999834	-0.998796	-0.703393	-0.760912	-0.930349	-0.983903	-0.990142	-0.981158	-0.987181	0	0.001735	0.018563	0.012728	0.008438	0.005451	0.000282	0.001907	0.217296	0.28467	0.116629	0.014679	0.012466	0.028515	0.015392
>gi|90111142|ref|NP_415025.4| DnaK co-chaperone, thioredoxin-like protein [Escherichia coli str. K-12 substr. MG1655]	-0.929829	-0.901963	-0.630736	-0.543449	-0.790113	-0.593886	-0.961143	-0.815301	-0.820796	-0.868984	-0.971501	-0.974004	-0.97202	-0.973812	-0.987151	0	0.190522	0.56181	0.574708	0.456722	0.448482	0.052677	0.221951	0.125041	0.089587	0.027042	0.018865	0.037661	0.042028	0.019665
>gi|16128477|ref|NP_415026.1| predicted oxidoreductase with NAD(P)-binding Rossmann-fold domain [Escherichia coli str. K-12 substr. MG1655]	-0.333568	-0.901963	-0.630736	-0.543449	-0.790113	-0.593886	-0.961143	-0.815301	-0.820796	-0.868984	-0.971501	-0.974004	-0.97202	-0.973812	-0.987151	0	0.190522	0.56181	0.574708	0.456722	0.448482	0.052677	0.221951	0.125041	0.089587	0.027042	0.018865	0.037661	0.042028	0.019665
>gi|16128478|ref|NP_415027.1| multifunctional acyl-CoA thioesterase I and protease I and lysophospholipase L1 [Escherichia coli str. K-12 substr. MG1655]	-0.810697	-0.956005	-0.859287	-0.82147	-0.905778	-0.886255	-0.96499	-0.976855	-0.78683	-0.908034	-0.974613	-0.985949	-0.994921	-0.989189	-0.992115	0	0.108111	0.187191	0.212431	0.096437	0.09632	0.042038	0.021472	0.120491	0.098342	0.034684	0.020078	0.004913	0.013984	0.008621
>gi|16128479|ref|NP_415028.1| predicted transporter subunit: ATP-binding component of ABC superfamily [Escherichia coli str. K-12 substr. MG1655]	-0.936431	-0.998453	-0.995954	-0.955503	-0.993557	-0.995233	-0.999649	-0.996928	-0.777579	-0.814511	-0.866213	-0.895189	-0.947883	-0.899688	-0.917636	0	0.00264	0.005311	0.120651	0.018915	0.006395	0.000415	0.004006	0.232359	0.121158	0.092893	0.093484	0.032702	0.081965	0.111013
>gi|16128480|ref|NP_415029.1| predicted ABC transporter permease [Escherichia coli str. K-12 substr. MG1655]	-0.925612	-0.999564	-0.973355	-0.960145	-0.997009	-0.973578	-0.998311	-0.993951	-0.002807	-0.724666	-0.769257	-0.826725	-0.940956	-0.955972	-0.935819	0	0.000816	0.069713	0.113927	0.007133	0.041428	0.002198	0.007181	0.248497	0.178972	0.228727	0.211179	0.100902	0.059775	0.070469
>gi|16128481|ref|NP_415030.1| rhsD element protein [Escherichia coli str. K-12 substr. MG1655]	-0.243388	-0.973041	-0.983053	-0.977063	-0.989945	-0.986801	-0.994486	-0.989815	0.048463	-0.224552	-0.512474	-0.443963	-0.737953	-0.779818	-0.758207	0	0.029282	0.015801	0.029519	0.018083	0.011389	0.007126	0.01354	0.273063	0.168497	0.187399	0.179192	0.108105	0.207054	0.131582
>gi|16128482|ref|NP_415031.1| predicted protein [Escherichia coli str. K-12 substr. MG1655]	-0.846914	-0.991377	-0.989454	-0.979099	-0.983838	-0.985427	-0.999603	-0.970465	0.173165	-0.182863	-0.265329	-0.629143	-0.720701	-0.780155	-0.76151	0	0.015082	0.024514	0.038471	0.04691	0.018421	0.000699	0.05311	0.350798	0.391333	0.305043	0.233419	0.236291	0.178836	0.194641
>gi|16128487|ref|NP_415036.1| tRNA 2-selenouridine synthase, selenophosphate-dependent [Escherichia coli str. K-12 substr. MG1655]	-0.979927	-0.99986	-0.998041	-0.986566	-0.996295	-0.998128	-0.999788	-0.997136	-0.909106	-0.92514	-0.970129	-0.981928	-0.988599	-0.990438	-0.988921	0	0.000163	0.002274	0.034665	0.010955	0.001784	0.000267	0.003421	0.082242	0.049865	0.030721	0.01604	0.008285	0.009546	0.009902
>gi|16128488|ref|NP_415037.1| DNA-binding transcriptional activator of the allD operon [Escherichia coli str. K-12 substr. MG1655]	0.873899	-0.826143	-0.7833	-0.86138	-0.89328	-0.876972	-0.959797	-0.97472	-0.012888	-0.546558	-0.570562	-0.763191	-0.890409	-0.90488	-0.867016	0	0.184785	0.097859	0.12981	0.172813	0.09095	0.031671	0.013734	0.213124	0.247002	0.431806	0.109538	0.084006	0.063296	0.105706
>gi|16128489|ref|NP_415038.1| ureidoglycolate hydrolase [Escherichia coli str. K-12 substr. MG1655]	-0.989338	-0.99974	-0.995649	-0.984961	-0.995491	-0.995598	-0.999583	-0.996723	-0.64605	-0.521289	-0.823954	-0.946598	-0.962673	-0.951367	-0.97131	0	0.000276	0.008283	0.029548	0.013004	0.004535	0.000689	0.00518	0.240404	0.562221	0.22143	0.042184	0.033741	0.05104	0.028638
>gi|16128490|ref|NP_415039.1| DNA-binding transcriptional repressor for all (allantoin) and gcl (glyoxylate) operons; glyoxylate-induced [Escherichia coli str. K-12 substr. MG1655]	-0.902335	-0.99974	-0.995649	-0.984961	-0.995491	-0.995598	-0.999583	-0.996723	-0.64605	-0.521289	-0.823954	-0.946598	-0.962673	-0.951367	-0.97131	0	0.000276	0.008283	0.029548	0.013004	0.004535	0.000689	0.00518	0.240404	0.562221	0.22143	0.042184	0.033741	0.05104	0.028638
>gi|16128491|ref|NP_415040.1| glyoxylate carboligase [Escherichia coli str. K-12 substr. MG1655]	-0.972594	-0.973481	-0.929265	-0.899748	-0.969365	-0.933611	-0.989441	-0.979845	-0.83126	-0.872119	-0.948272	-0.96389	-0.977705	-0.969821	-0.987548	0	0.026876	0.052403	0.112152	0.072538	0.056254	0.017954	0.01534	0.13292	0.093726	0.04376	0.035002	0.020009	0.022879	0.014282
>gi|16128492|ref|NP_415041.1| hydroxypyruvate isomerase [Escherichia coli str. K-12 substr. MG1655]	-0.991392	-0.996858	-0.997692	-0.988591	-0.993944	-0.996328	-0.999562	-0.995875	-0.473216	-0.652422	-0.690466	-0.813866	-0.834376	-0.787251	-0.866648	0	0.004438	0.002168	0.013164	0.018104	0.004694	0.000796	0.005413	0.2498	0.187423	0.194089	0.163087	0.098458	0.135435	0.100216
>gi|16128493|ref|NP_415042.1| tartronate semialdehyde reductase, NADH-dependent [Escherichia coli str. K-12 substr. MG1655]	-0.970424	-0.916423	-0.959174	-0.930734	-0.982549	-0.967293	-0.997244	-0.991386	-0.341971	-0.568456	-0.716119	-0.746821	-0.83881	-0.837021	-0.838263	0	0.151111	0.029099	0.08451	0.034368	0.029882	0.003286	0.008296	0.352717	0.208073	0.1267	0.118806	0.086779	0.086198	0.185701
>gi|90111144|ref|NP_415044.4| predicted allantoin transporter [Escherichia coli str. K-12 substr. MG1655]	-0.910255	-0.999682	-0.999234	-0.996923	-0.999304	-0.994087	-0.999781	-0.998918	-0.155239	-0.530755	-0.741974	-0.858674	-0.898266	-0.876939	-0.923679	0	0.000844	0.001052	0.004933	0.002014	0.014032	0.000558	0.001511	0.600963	0.272888	0.16213	0.099703	0.066604	0.111209	0.058536
>gi|16128496|ref|NP_415045.1| allantoinase [Escherichia coli str. K-12 substr. MG1655]	-0.985252	-0.997263	-0.987445	-0.970792	-0.989778	-0.983812	-0.996437	-0.994787	-0.446375	-0.543262	-0.682401	-0.729556	-0.771236	-0.679855	-0.825247	0	0.003742	0.015577	0.036181	0.030289	0.016453	0.005874	0.005887	0.204546	0.196178	0.200903	0.176433	0.091491	0.132591	0.124778
>gi|90111145|ref|NP_415046.4| predicted uracil/xanthine transporter [Escherichia coli str. K-12 substr. MG1655]	-0.300275	-0.999731	-0.990846	-0.996307	-0.999324	-0.988088	-0.999674	-0.998584	0.002081	-0.489241	-0.530026	-0.809926	-0.82766	-0.895413	-0.92204	0	0.000714	0.026915	0.005859	0.001985	0.03063	0.000809	0.001996	0.588182	0.351369	0.444079	0.152781	0.144987	0.054386	0.075544
>gi|16128498|ref|NP_415047.1| glycerate kinase II [Escherichia coli str. K-12 substr. MG1655]	-0.988294	-0.988627	-0.966975	-0.950851	-0.979897	-0.965864	-0.998373	-0.988599	-0.008931	-0.267518	-0.627561	-0.512258	-0.701153	-0.735282	-0.684927	0	0.01799	0.042928	0.066047	0.059716	0.049821	0.003488	0.015766	0.403651	0.442658	0.285965	0.222717	0.187612	0.114757	0.307357
>gi|16128499|ref|NP_415048.1| conserved protein [Escherichia coli str. K-12 substr. MG1655]	-0.50962	-0.998392	-0.997789	-0.985299	-0.995486	-0.995449	-0.999899	-0.994318	0.524041	0.4085	0.171356	0.164386	-0.065786	-0.250512	-0.190236	0	0.00247	0.005255	0.029392	0.012313	0.006966	9.7e-05	0.008708	0.286665	0.341975	0.446662	0.280935	0.355685	0.372885	0.335464
>gi|16128500|ref|NP_415049.1| allantoate amidohydrolase [Escherichia coli str. K-12 substr. MG1655]	0.459035	-0.902797	-0.872972	-0.883146	-0.938272	-0.910785	-0.966537	-0.96959	0.347688	0.06658	-0.210182	-0.276785	-0.394334	-0.415796	-0.541753	0	0.101922	0.100593	0.066339	0.060111	0.058491	0.01771	0.012137	0.262605	0.142334	0.204675	0.226277	0.169981	0.079858	0.202922
>gi|16128501|ref|NP_415050.1| ureidoglycolate dehydrogenase [Escherichia coli str. K-12 substr. MG1655]	-0.326233	-0.938576	-0.965951	-0.926096	-0.961496	-0.976222	-0.99495	-0.990149	-0.71546	-0.765235	-0.901556	-0.893357	-0.961466	-0.957628	-0.962797	0	0.08689	0.032576	0.069361	0.041787	0.011767	0.003551	0.009232	0.149244	0.085346	0.068304	0.048877	0.020095	0.024779	0.02048
>gi|16128502|ref|NP_415051.1| multicopy suppressor of dominant negative ftsH mutations; predicted acyl-CoA synthetase with NAD(P)-binding Rossmann-fold domain [Escherichia coli str. K-12 substr. MG1655]	-0.762086	-0.938576	-0.965951	-0.926096	-0.961496	-0.976222	-0.99495	-0.990149	-0.71546	-0.765235	-0.901556	-0.893357	-0.961466	-0.957628	-0.962797	0	0.08689	0.032576	0.069361	0.041787	0.011767	0.003551	0.009232	0.149244	0.085346	0.068304	0.048877	0.020095	0.024779	0.02048
>gi|16128504|ref|NP_415053.1| conserved protein [Escherichia coli str. K-12 substr. MG1655]	-0.835153	-0.999995	-0.999965	-0.997657	-0.999852	-0.999815	-0.99997	-0.999863	-0.573624	-0.819232	-0.889914	-0.911051	-0.888631	-0.951596	-0.929986	0	9e-06	5.6e-05	0.007154	0.000449	0.000338	6.3e-05	0.000203	0.262897	0.234269	0.093626	0.088106	0.232164	0.081675	0.080052
>gi|16128505|ref|NP_415054.1| predicted carbamate kinase [Escherichia coli str. K-12 substr. MG1655]	0.689427	-0.946287	-0.779161	-0.815432	-0.927874	-0.888336	-0.984832	-0.9506	-0.405102	-0.544662	-0.756583	-0.726394	-0.89638	-0.917325	-0.879956	0	0.054956	0.310111	0.217765	0.159006	0.089268	0.011029	0.04106	0.276629	0.222881	0.112206	0.105205	0.080847	0.0665	0.115522
>gi|16128506|ref|NP_415055.1| N5-carboxyaminoimidazole ribonucleotide synthase [Escherichia coli str. K-12 substr. MG1655]	-0.163024	-0.999335	-0.992928	-0.977977	-0.995256	-0.991877	-0.998748	-0.995414	-0.370072	-0.578065	-0.72272	-0.82878	-0.918574	-0.956919	-0.907608	0	0.000712	0.006143	0.056405	0.013007	0.008679	0.001615	0.004584	0.146715	0.322122	0.209708	0.113232	0.071005	0.034697	0.066564
>gi|16128507|ref|NP_415056.1| N5-carboxyaminoimidazole ribonucleotide mutase [Escherichia coli str. K-12 substr. MG1655]	-0.620019	-0.980832	-0.982318	-0.945858	-0.988694	-0.993024	-0.999121	-0.997079	-0.8536	-0.871949	-0.915331	-0.954539	-0.978674	-0.977406	-0.981973	0	0.038717	0.027379	0.124493	0.021725	0.006096	0.001125	0.003525	0.119043	0.086228	0.08512	0.039031	0.022762	0.028937	0.016817
>gi|16128508|ref|NP_415057.1| UDP-2,3-diacylglucosamine pyrophosphatase [Escherichia coli str. K-12 substr. MG1655]	-0.999459	-0.99965	-0.997994	-0.986777	-0.998569	-0.997963	-0.999573	-0.998952	-0.955507	-0.958037	-0.980569	-0.994667	-0.995521	-0.993726	-0.995819	0	0.000351	0.00406	0.02868	0.004063	0.001849	0.00047	0.001512	0.056255	0.042378	0.031396	0.005613	0.006272	0.008068	0.005413
>gi|16128509|ref|NP_415058.1| peptidyl-prolyl cis-trans isomerase B (rotamase B) [Escherichia coli str. K-12 substr. MG1655]	-0.403754	-0.99965	-0.997994	-0.986777	-0.998569	-0.997963	-0.999573	-0.998952	-0.955507	-0.958037	-0.980569	-0.994667	-0.995521	-0.993726	-0.995819	0	0.000351	0.00406	0.02868	0.004063	0.001849	0.00047	0.001512	0.056255	0.042378	0.031396	0.005613	0.006272	0.008068	0.005413
>gi|16128510|ref|NP_415059.1| cysteinyl-tRNA synthetase [Escherichia coli str. K-12 substr. MG1655]	-0.972771	-0.898329	-0.888112	-0.811803	-0.966599	-0.946042	-0.988449	-0.97904	-0.809696	-0.844117	-0.920052	-0.949015	-0.960885	-0.949666	-0.972041	0	0.213381	0.096773	0.213064	0.068788	0.043257	0.012021	0.020056	0.121083	0.123201	0.084624	0.04122	0.037106	0.031594	0.035334
>gi|16128511|ref|NP_415060.1| inner membrane protein, DUF457 family [Escherichia coli str. K-12 substr. MG1655]	-0.997731	-0.999998	-0.999989	-0.994155	-0.999948	-0.999318	-0.999944	-0.999921	-0.177763	-0.615754	-0.573866	-0.796623	-0.882327	-0.945471	-0.940261	0	3e-06	1.6e-05	0.018461	0.000164	0.002044	0.000146	0.000112	0.64373	0.207753	0.35675	0.211243	0.119328	0.06607	0.060324
>gi|90111146|ref|NP_415061.2| Ribosome-associated protein; predicted RNA-binding protein [Escherichia coli str. K-12 substr. MG1655]	-0.548557	-0.999968	-0.999005	-0.990608	-0.99934	-0.999799	-0.999956	-0.999757	-0.885777	-0.884911	-0.875389	-0.925876	-0.990359	-0.940781	-0.969354	0	6.4e-05	0.002966	0.029493	0.00206	0.000217	0.0001	0.000343	0.113632	0.084642	0.140095	0.086391	0.007666	0.081291	0.037387
>gi|16128513|ref|NP_415062.1| bifunctional 5,10-methylene-tetrahydrofolate dehydrogenase/ 5,10-methylene-tetrahydrofolate cyclohydrolase [Escherichia coli str. K-12 substr. MG1655]	-0.891545	-0.972913	-0.940633	-0.930212	-0.970028	-0.903834	-0.989763	-0.977334	-0.608903	-0.743784	-0.888874	-0.898852	-0.950549	-0.937417	-0.972749	0	0.030191	0.061969	0.086592	0.082484	0.092234	0.013311	0.020139	0.192109	0.140025	0.093302	0.075346	0.03202	0.056748	0.025583
>gi|90111147|ref|NP_415063.4| predicted fimbrial-like adhesin protein [Escherichia coli str. K-12 substr. MG1655]	0.973913	-0.674552	-0.827903	-0.760911	-0.943953	-0.959215	-0.995931	-0.976459	0.648151	0.392238	0.371052	0.092251	-0.138063	-0.370198	-0.319232	0	0.394749	0.243078	0.290459	0.123095	0.031928	0.007558	0.033092	0.282295	0.292894	0.377469	0.285713	0.311352	0.308919	0.349781
>gi|16128515|ref|NP_415064.1| pilin chaperone, periplasmic [Escherichia coli str. K-12 substr. MG1655]	0.590252	-0.961878	-0.971472	-0.959587	-0.971955	-0.944411	-0.994889	-0.994725	-0.433672	-0.768482	-0.771165	-0.952492	-0.926699	-0.962354	-0.964689	0	0.053741	0.035732	0.04607	0.043423	0.065429	0.007231	0.005944	0.270757	0.264963	0.378519	0.051385	0.164685	0.057737	0.044052
>gi|16128516|ref|NP_415065.1| predicted outer membrane export usher protein [Escherichia coli str. K-12 substr. MG1655]	0.716728	-0.967241	-0.989627	-0.983618	-0.995622	-0.987838	-0.999052	-0.993544	0.71044	0.409489	-0.014176	-0.153331	-0.515165	-0.551408	-0.583331	0	0.036912	0.008888	0.022482	0.008302	0.010444	0.001152	0.008309	0.114943	0.293809	0.426087	0.195679	0.212754	0.331552	0.086709
>gi|145698227|ref|NP_415066.2| predicted fimbrial-like adhesin protein [Escherichia coli str. K-12 substr. MG1655]	0.999615	-0.478046	-0.55391	-0.556006	-0.762276	-0.447634	-0.879343	-0.822107	0.586694	0.335317	-0.221393	-0.235941	-0.409215	-0.340315	-0.36541	0	0.4016	0.471551	0.363518	0.242246	0.274312	0.145662	0.117227	0.233952	0.310067	0.254449	0.250046	0.240802	0.254379	0.250721
>gi|16128518|ref|NP_415067.1| predicted fimbrial-like adhesin protein [Escherichia coli str. K-12 substr. MG1655]	0.84612	-0.960625	-0.930697	-0.954815	-0.986581	-0.91594	-0.973765	-0.985045	0.735992	0.391584	0.41236	0.034822	-0.120839	-0.103583	-0.030251	0	0.038038	0.081952	0.049216	0.019156	0.111265	0.056066	0.014383	0.18554	0.481117	0.326518	0.24948	0.344539	0.298929	0.399191
>gi|16128519|ref|NP_415068.1| predicted DNA-binding transcriptional regulator [Escherichia coli str. K-12 substr. MG1655]	-0.243237	-0.984104	-0.995037	-0.993618	-0.996243	-0.994305	-0.999745	-0.997462	-0.651866	-0.810297	-0.913018	-0.950783	-0.976693	-0.966347	-0.983072	0	0.027914	0.007655	0.007802	0.00917	0.005904	0.000326	0.004263	0.22462	0.110092	0.07474	0.061754	0.028006	0.025035	0.021115
>gi|16128520|ref|NP_415069.1| DLP12 prophage; predicted integrase [Escherichia coli str. K-12 substr. MG1655]	-0.987847	-0.999851	-0.99957	-0.98994	-0.999505	-0.999093	-0.999633	-0.999529	-0.92478	-0.96658	-0.992692	-0.996503	-0.995561	-0.996943	-0.997621	0	0.00025	0.00077	0.031272	0.001382	0.00112	0.000965	0.000654	0.076731	0.035261	0.009383	0.003843	0.005191	0.003071	0.00387
>gi|226524703|ref|NP_415072.2| IS3 transposase A [Escherichia coli str. K-12 substr. MG1655]	-0.444617	-0.970844	-0.769621	-0.857416	-0.974012	-0.948886	-0.991909	-0.953726	-0.848176	-0.879488	-0.98415	-0.989145	-0.986614	-0.993067	-0.996547	0	0.065989	0.373913	0.270605	0.056511	0.048208	0.015816	0.058886	0.152204	0.319737	0.022024	0.017988	0.023402	0.008284	0.005078
>gi|16128524|ref|NP_415073.1| IS3 transposase B [Escherichia coli str. K-12 substr. MG1655]	-0.968959	-0.999874	-0.999768	-0.997842	-0.999848	-0.999407	-0.999835	-0.999322	-0.833734	-0.936414	-0.983045	-0.986632	-0.990924	-0.993401	-0.992737	0	0.000328	0.000353	0.005761	0.000307	0.000451	0.000233	0.001192	0.150449	0.072316	0.023414	0.014963	0.013575	0.006364	0.01023
>gi|16128526|ref|NP_415075.1| DLP12 prophage; multidrug resistance protein [Escherichia coli str. K-12 substr. MG1655]	-0.751408	-0.999974	-0.993172	-0.999729	-0.999861	-0.999647	-0.999994	-0.999842	0.263268	0.417731	0.065443	-0.023544	-0.377408	-0.36332	-0.667693	0	7.2e-05	0.021557	0.000794	0.000426	0.001049	1.5e-05	0.000384	0.745766	0.402469	0.482012	0.425706	0.492868	0.5613	0.366842
>gi|16128527|ref|NP_415076.1| DLP12 prophage; predicted recombinase [Escherichia coli str. K-12 substr. MG1655]	-0.737354	-0.994598	-0.9977	-0.993862	-0.997019	-0.993414	-0.999513	-0.99757	-0.855362	-0.942576	-0.980332	-0.985021	-0.989528	-0.987356	-0.994572	0	0.008039	0.003687	0.008909	0.007846	0.007315	0.000718	0.003969	0.094292	0.039839	0.018362	0.016159	0.014416	0.011077	0.007282
>gi|16128528|ref|NP_415077.1| DLP12 prophage; secreted protein, UPF0098 family [Escherichia coli str. K-12 substr. MG1655]	0.972854	-0.998738	-0.999132	-0.995094	-0.998877	-0.994843	-0.999842	-0.998044	0.553471	0.100804	-0.053515	-0.376824	-0.41065	-0.468774	-0.591573	0	0.001648	0.000997	0.010964	0.002673	0.011395	0.000182	0.00249	0.37927	0.554333	0.56166	0.235379	0.338206	0.310552	0.245315
>gi|16128529|ref|NP_415078.1| DLP12 prophage; predicted DNA-binding transcriptional regulator [Escherichia coli str. K-12 substr. MG1655]	-0.758156	-0.999516	-0.999671	-0.997884	-0.999306	-0.998906	-0.999948	-0.999325	-0.881086	-0.946751	-0.973384	-0.98683	-0.989829	-0.991179	-0.995042	0	0.000747	0.000559	0.005369	0.001981	0.001296	5.6e-05	0.000921	0.10138	0.039434	0.026062	0.014656	0.013966	0.009536	0.0053
>gi|145698228|ref|YP_001165308.1| hypothetical protein, DLP12 prophage [Escherichia coli str. K-12 substr. MG1655]	0.937608	-0.995154	-0.999542	-0.907752	-0.998466	-0.998695	-0.999918	-0.991335	-0.181829	0.139525	-0.097017	-0.066054	0.309849	0.49615	-0.20158	0	0.009213	0.00064	0.272528	0.003136	0.002166	0.000147	0.022578	0.522778	0.591048	0.721051	0.697391	0.408164	0.66838	0.657125
>gi|16128530|ref|NP_415079.1| DLP12 prophage; predicted protein [Escherichia coli str. K-12 substr. MG1655]	-0.474721	-0.999867	-0.999763	-0.996333	-0.99935	-0.999339	-0.999888	-0.999205	-0.467943	-0.666766	-0.768811	-0.836602	-0.931276	-0.874304	-0.937161	0	0.000191	0.00031	0.009951	0.001788	0.000761	0.00012	0.00097	0.311303	0.170614	0.206485	0.144092	0.057474	0.056382	0.048039
>gi|16128531|ref|NP_415080.1| DLP12 prophage; conserved protein [Escherichia coli str. K-12 substr. MG1655]	-0.986904	-0.97159	-0.971247	-0.979805	-0.991268	-0.961537	-0.994955	-0.964179	-0.816413	-0.945154	-0.97632	-0.977148	-0.976864	-0.975953	-0.992672	0	0.058531	0.051487	0.036772	0.011437	0.058846	0.006092	0.059204	0.215728	0.078008	0.044881	0.035432	0.047877	0.056919	0.011723
>gi|16128532|ref|NP_415081.1| DLP12 prophage; predicted protein [Escherichia coli str. K-12 substr. MG1655]	-0.987837	-0.999966	-0.999947	-0.998314	-0.999532	-0.999289	-0.999961	-0.999175	-0.797129	-0.840367	-0.916842	-0.942158	-0.952879	-0.931817	-0.966079	0	7.9e-05	4.6e-05	0.004522	0.001474	0.001845	6.7e-05	0.001496	0.186398	0.131289	0.086538	0.105599	0.047013	0.067312	0.046842
>gi|16128533|ref|NP_415082.1| DLP12 prophage; endonuclease RUS [Escherichia coli str. K-12 substr. MG1655]	0.162859	-0.738284	-0.712294	-0.885446	-0.807787	-0.778797	-0.96406	-0.931135	-0.678492	-0.931696	-0.986726	-0.992431	-0.991092	-0.991604	-0.994238	0	0.438291	0.32067	0.110748	0.305153	0.274623	0.036199	0.051985	0.24216	0.060752	0.008716	0.006144	0.014558	0.010462	0.012173
>gi|94541097|ref|YP_588439.1| expressed protein, DLP12 prophage [Escherichia coli str. K-12 substr. MG1655]	-0.957503	-0.953355	-0.675511	-0.831224	-0.857135	-0.785902	-0.910897	-0.798624	-0.309099	-0.854367	-0.866085	-0.801701	-0.936136	-0.921555	-0.93689	0	0.058762	0.449877	0.179418	0.358657	0.268285	0.141636	0.311106	0.472829	0.125835	0.144729	0.246077	0.117727	0.101628	0.063855
>gi|16128534|ref|NP_415083.1| DLP12 prophage; predicted antitermination protein [Escherichia coli str. K-12 substr. MG1655]	-0.570982	-0.999884	-0.999697	-0.997581	-0.999078	-0.999049	-0.999025	-0.999135	-0.094695	-0.084222	-0.219327	-0.536322	-0.564937	-0.204091	-0.638049	0	0.000177	0.000313	0.004546	0.002821	0.001574	0.002785	0.001433	0.453305	0.35872	0.610078	0.36244	0.379554	0.442402	0.389677
>gi|16128535|ref|NP_415084.1| IS5 transposase and trans-activator [Escherichia coli str. K-12 substr. MG1655]	-0.744568	-0.998613	-0.994676	-0.986873	-0.997403	-0.997758	-0.999282	-0.99762	-0.879701	-0.959683	-0.990406	-0.996298	-0.996596	-0.995505	-0.995853	0	0.003257	0.009412	0.032106	0.006135	0.00217	0.001499	0.003123	0.126844	0.040309	0.012338	0.004871	0.003903	0.006146	0.008357
>gi|16128537|ref|NP_415086.1| DLP12 prophage; predicted phage lysis protein [Escherichia coli str. K-12 substr. MG1655]	-0.9744	-0.986663	-0.927876	-0.932358	-0.951834	-0.952962	-0.995512	-0.983752	0.10171	-0.157307	-0.444818	-0.205437	-0.60604	-0.457902	-0.549868	0	0.018867	0.118344	0.118785	0.083881	0.078193	0.004455	0.026337	0.588611	0.525284	0.327021	0.522783	0.346976	0.378856	0.439129
>gi|16128538|ref|NP_415087.1| DLP12 prophage; predicted lysozyme [Escherichia coli str. K-12 substr. MG1655]	0.497618	-0.99927	-0.999226	-0.996382	-0.997371	-0.994864	-0.999247	-0.998259	-0.169606	-0.527118	-0.637806	-0.739316	-0.834347	-0.755066	-0.819346	0	0.001321	0.000995	0.006402	0.005196	0.010732	0.001243	0.001309	0.383757	0.327191	0.266351	0.102563	0.184459	0.359691	0.142004
>gi|16128539|ref|NP_415088.1| DLP12 prophage; predicted murein endopeptidase [Escherichia coli str. K-12 substr. MG1655]	-0.449327	-0.555159	-0.681022	-0.779219	-0.851016	-0.732939	-0.941169	-0.907835	-0.835175	-0.955584	-0.986984	-0.996036	-0.995913	-0.996045	-0.997646	0	0.378165	0.262487	0.1867	0.148766	0.188607	0.10902	0.108207	0.277158	0.071242	0.01797	0.006236	0.006627	0.005163	0.003605
>gi|94541098|ref|YP_588440.1| DLP12 prophage; predicted lipoprotein [Escherichia coli str. K-12 substr. MG1655]	0.136563	-0.989537	-0.965279	-0.952295	-0.986052	-0.93307	-0.975779	-0.991039	0.125401	-0.38714	-0.632724	-0.525783	-0.727668	-0.570954	-0.781205	0	0.024243	0.045201	0.099611	0.038369	0.176488	0.060508	0.017674	0.59747	0.634638	0.410869	0.406361	0.380682	0.525877	0.284433
>gi|16128540|ref|NP_415089.1| DLP12 prophage; predicted lipoprotein [Escherichia coli str. K-12 substr. MG1655]	0.375778	-0.734148	-0.957033	-0.943303	-0.980064	-0.937044	-0.977186	-0.881173	-0.378839	-0.388327	-0.545846	-0.83049	-0.827543	-0.843391	-0.851351	0	0.546227	0.062639	0.095216	0.026223	0.07267	0.045236	0.327795	0.519987	0.464876	0.386585	0.128848	0.357592	0.115703	0.105286
>gi|90111149|ref|NP_415090.2| DLP12 prophage; predicted protein [Escherichia coli str. K-12 substr. MG1655]	-0.817952	-0.996982	-0.994904	-0.992141	-0.992232	-0.991479	-0.999716	-0.993191	-0.925004	-0.96908	-0.990701	-0.996799	-0.99424	-0.987403	-0.996988	0	0.002582	0.009222	0.011891	0.0186	0.010457	0.00033	0.009147	0.08035	0.030755	0.00786	0.002828	0.009528	0.016803	0.005268
>gi|16128542|ref|NP_415091.1| DLP12 prophage; predicted protein [Escherichia coli str. K-12 substr. MG1655]	-0.19645	-0.757195	-0.871616	-0.799454	-0.952953	-0.878594	-0.992695	-0.977448	-0.674844	-0.763955	-0.895339	-0.955472	-0.940471	-0.952643	-0.97568	0	0.501881	0.200936	0.297447	0.095231	0.188422	0.011165	0.02986	0.373478	0.309133	0.077935	0.047711	0.078563	0.056258	0.033419
>gi|145698229|ref|YP_001165309.1| hypothetical protein b4589 [Escherichia coli str. K-12 substr. MG1655]	0.123487	-0.387332	-0.569855	-0.857869	-0.818173	-0.825773	-0.943982	-0.957956	-0.085063	-0.569078	-0.660458	-0.898066	-0.892964	-0.947384	-0.971359	0	0.576276	0.491286	0.204892	0.314097	0.237959	0.093835	0.071595	0.573222	0.574683	0.601096	0.153818	0.302602	0.0753	0.041018
>gi|16128543|ref|NP_415092.1| DLP12 prophage; DNA packaging protein [Escherichia coli str. K-12 substr. MG1655]	-0.625502	-0.722294	-0.51474	-0.561092	-0.858851	-0.803016	-0.958723	-0.929201	-0.835393	-0.905209	-0.956593	-0.966126	-0.974258	-0.973591	-0.986981	0	0.322366	0.350893	0.378013	0.201479	0.143691	0.055754	0.076559	0.103464	0.075467	0.030307	0.02627	0.025852	0.022964	0.013427
>gi|16128547|ref|NP_415096.1| DNA-binding global transcriptional activator; DLP12 prophage [Escherichia coli str. K-12 substr. MG1655]	-0.218779	-0.99267	-0.999421	-0.998523	-0.999003	-0.995426	-0.99993	-0.997798	-0.552723	-0.813959	-0.771939	-0.934033	-0.957913	-0.935816	-0.972243	0	0.017023	0.000697	0.002069	0.002811	0.010199	0.000123	0.004403	0.331977	0.131324	0.362802	0.051915	0.052752	0.056258	0.03193
>gi|16128548|ref|NP_415097.1| DLP12 prophage; outer membrane protease VII (outer membrane protein 3b) [Escherichia coli str. K-12 substr. MG1655]	-0.603423	-0.99267	-0.999421	-0.998523	-0.999003	-0.995426	-0.99993	-0.997798	-0.552723	-0.813959	-0.771939	-0.934033	-0.957913	-0.935816	-0.972243	0	0.017023	0.000697	0.002069	0.002811	0.010199	0.000123	0.004403	0.331977	0.131324	0.362802	0.051915	0.052752	0.056258	0.03193
>gi|16128549|ref|NP_415098.1| DNA-binding transcriptional activator of porin biosynthesis [Escherichia coli str. K-12 substr. MG1655]	0.811103	-0.997273	-0.995179	-0.99517	-0.981489	-0.991283	-0.999311	-0.997881	-0.700073	-0.903603	-0.950223	-0.978563	-0.97844	-0.982634	-0.99268	0	0.004247	0.011934	0.006403	0.054268	0.016341	0.000977	0.003143	0.288661	0.067392	0.048411	0.017487	0.038196	0.017449	0.008728
>gi|16128550|ref|NP_415099.1| predicted protein [Escherichia coli str. K-12 substr. MG1655]	-0.968761	-0.994719	-0.981892	-0.962055	-0.99324	-0.975618	-0.993586	-0.993896	-0.532904	-0.824661	-0.936792	-0.947829	-0.983496	-0.969194	-0.96683	0	0.006838	0.021069	0.05503	0.009151	0.016786	0.007158	0.006243	0.213259	0.174292	0.073508	0.056368	0.020537	0.048554	0.042828
>gi|16128551|ref|NP_415100.1| bacteriophage N4 receptor, outer membrane subunit [Escherichia coli str. K-12 substr. MG1655]	-0.643909	-0.955037	-0.894747	-0.898902	-0.942607	-0.94179	-0.980149	-0.978221	-0.614947	-0.839868	-0.933222	-0.95944	-0.976096	-0.99418	-0.977584	0	0.044293	0.103443	0.108458	0.087181	0.049513	0.01413	0.016515	0.489396	0.169568	0.087093	0.037559	0.041914	0.005375	0.032489
>gi|16128552|ref|NP_415101.1| bacteriophage N4 receptor, inner membrane subunit [Escherichia coli str. K-12 substr. MG1655]	-0.815443	-0.989043	-0.963793	-0.944527	-0.982082	-0.957853	-0.980757	-0.982501	-0.393647	-0.655535	-0.838423	-0.890707	-0.961689	-0.953868	-0.93769	0	0.010632	0.035539	0.064106	0.02437	0.034125	0.016284	0.012467	0.220412	0.199266	0.1098	0.055943	0.026135	0.043917	0.0588
>gi|16128553|ref|NP_415102.1| sensory histidine kinase in two-component regulatory system with CusR, senses copper ions [Escherichia coli str. K-12 substr. MG1655]	-0.981947	-0.936538	-0.93801	-0.926319	-0.970939	-0.970095	-0.993117	-0.992427	-0.831021	-0.863977	-0.931526	-0.968285	-0.981006	-0.977458	-0.987987	0	0.120439	0.085507	0.0746	0.035014	0.01925	0.007281	0.007536	0.154182	0.091749	0.052618	0.026929	0.018788	0.017087	0.013612
>gi|16128554|ref|NP_415103.1| DNA-binding response regulator in two-component regulatory system with CusS [Escherichia coli str. K-12 substr. MG1655]	-0.998169	-0.404931	-0.050055	-0.136774	-0.509986	-0.306633	-0.71666	-0.6712	-0.001698	-0.297721	-0.457533	-0.565898	-0.608865	-0.673887	-0.691601	0	0.46734	0.583327	0.385384	0.409952	0.401935	0.184147	0.232625	0.218892	0.446094	0.334818	0.32388	0.136928	0.146987	0.276343
>gi|16128555|ref|NP_415104.1| copper/silver efflux system, outer membrane component [Escherichia coli str. K-12 substr. MG1655]	-0.309092	-0.618951	-0.510767	-0.519036	-0.826474	-0.718489	-0.943149	-0.952069	-0.50909	-0.732657	-0.905899	-0.88292	-0.925992	-0.9796	-0.945696	0	0.390126	0.566723	0.298756	0.263012	0.177049	0.082667	0.045203	0.403248	0.319561	0.117608	0.143476	0.145621	0.021782	0.094551
>gi|16128556|ref|NP_415105.1| periplasmic copper- and silver-binding protein [Escherichia coli str. K-12 substr. MG1655]	-0.96814	-0.895759	-0.9572	-0.900231	-0.951192	-0.959334	-0.995093	-0.993264	-0.75874	-0.714028	-0.898528	-0.977929	-0.991712	-0.978218	-0.990798	0	0.105321	0.031661	0.211371	0.071184	0.092403	0.006206	0.009909	0.315953	0.388239	0.144014	0.01775	0.01125	0.027018	0.01619
>gi|16128557|ref|NP_415106.1| copper/silver efflux system, membrane fusion protein [Escherichia coli str. K-12 substr. MG1655]	0.849515	0.802485	0.619546	0.465465	0.565411	0.168923	-0.017936	-0.485986	-0.065987	-0.464225	-0.629671	-0.762372	-0.847505	-0.861889	-0.872145	0	0.161847	0.263043	0.368713	0.291768	0.39673	0.497896	0.403664	0.217726	0.186945	0.142941	0.082263	0.086476	0.106574	0.080559
>gi|16128558|ref|NP_415107.1| copper/silver efflux system, membrane component [Escherichia coli str. K-12 substr. MG1655]	-0.768339	-0.968604	-0.932492	-0.912926	-0.977354	-0.944319	-0.988961	-0.982375	-0.128869	-0.49051	-0.592424	-0.754189	-0.891608	-0.916564	-0.910123	0	0.042675	0.054854	0.124654	0.044978	0.065259	0.009968	0.013962	0.2937	0.157239	0.281693	0.068271	0.056775	0.074382	0.066126
>gi|16128559|ref|NP_415108.1| phenylalanine transporter [Escherichia coli str. K-12 substr. MG1655]	-0.972584	-0.999962	-0.999525	-0.994506	-0.999412	-0.993535	-0.999862	-0.998645	-0.267265	-0.657291	-0.818856	-0.91495	-0.955642	-0.93139	-0.960811	0	8.1e-05	0.00053	0.015265	0.001766	0.015745	0.000196	0.002027	0.523241	0.253387	0.133796	0.065232	0.034042	0.070248	0.037741
>gi|16128560|ref|NP_415109.1| mechanosensitive channel protein, miniconductance [Escherichia coli str. K-12 substr. MG1655]	-0.920227	-0.999061	-0.989419	-0.990493	-0.99605	-0.996089	-0.999558	-0.998378	-0.459389	-0.658152	-0.646691	-0.915026	-0.959158	-0.962549	-0.947957	0	0.002433	0.020943	0.020409	0.007203	0.005568	0.000469	0.002037	0.343735	0.34068	0.406399	0.091416	0.055779	0.038562	0.054392
>gi|16128561|ref|NP_415110.1| dihydropteridine reductase, NAD(P)H-dependent, oxygen-insensitive [Escherichia coli str. K-12 substr. MG1655]	-0.89376	-0.999061	-0.989419	-0.990493	-0.99605	-0.996089	-0.999558	-0.998378	-0.459389	-0.658152	-0.646691	-0.915026	-0.959158	-0.962549	-0.947957	0	0.002433	0.020943	0.020409	0.007203	0.005568	0.000469	0.002037	0.343735	0.34068	0.406399	0.091416	0.055779	0.038562	0.054392
>gi|16128562|ref|NP_415111.1| conserved protein [Escherichia coli str. K-12 substr. MG1655]	-0.426665	-0.999822	-0.999498	-0.989386	-0.998288	-0.997256	-0.99982	-0.999316	-0.901966	-0.949921	-0.974177	-0.983981	-0.992884	-0.983453	-0.992839	0	0.00027	0.000652	0.031539	0.005169	0.00404	0.000281	0.001012	0.061163	0.050026	0.027838	0.019187	0.005021	0.019139	0.006624
>gi|16128563|ref|NP_415112.1| predicted inner membrane protein [Escherichia coli str. K-12 substr. MG1655]	-0.999959	-0.999903	-0.994839	-0.979251	-0.998925	-0.997667	-0.999678	-0.995811	-0.378896	-0.590472	-0.633164	-0.753238	-0.911424	-0.854026	-0.887275	0	0.000194	0.012269	0.062229	0.002875	0.005127	0.000666	0.010277	0.530019	0.329087	0.233361	0.302072	0.095603	0.170609	0.157516
>gi|16128564|ref|NP_415113.1| weak gamma-glutamyl:cysteine ligase [Escherichia coli str. K-12 substr. MG1655]	-0.950039	-0.999874	-0.99956	-0.994939	-0.999056	-0.999407	-0.999888	-0.999431	-0.804377	-0.825549	-0.906543	-0.932753	-0.972876	-0.96141	-0.970987	0	0.000132	0.000643	0.011048	0.002574	0.000569	0.00018	0.000782	0.135679	0.081839	0.066876	0.053407	0.023596	0.026477	0.026893
>gi|49176035|ref|YP_025295.1| toxic polypeptide, small [Escherichia coli str. K-12 substr. MG1655]	-0.944426	-0.697605	-0.826475	-0.899932	-0.977348	-0.663931	-0.957645	-0.912467	-0.227223	-0.228117	-0.132313	-0.565804	-0.641909	-0.415637	-0.483616	0	0.507601	0.126217	0.118048	0.039607	0.480726	0.06481	0.071864	0.586123	0.511143	0.444697	0.413678	0.264029	0.488778	0.464751
>gi|16128565|ref|NP_415114.1| IS186 transposase [Escherichia coli str. K-12 substr. MG1655]	-0.854648	-0.999427	-0.998117	-0.992199	-0.998202	-0.996874	-0.999702	-0.998622	-0.729291	-0.877894	-0.914598	-0.955647	-0.97865	-0.968868	-0.957619	0	0.000608	0.002495	0.016204	0.003483	0.003316	0.000373	0.001464	0.110937	0.109899	0.08762	0.048829	0.019548	0.037003	0.051556
>gi|16128566|ref|NP_415115.1| phosphopantetheinyltransferase component of enterobactin synthase multienzyme complex [Escherichia coli str. K-12 substr. MG1655]	-0.999833	-0.999971	-0.999889	-0.998276	-0.999724	-0.99985	-0.999983	-0.999752	-0.896491	-0.762134	-0.929422	-0.980532	-0.991798	-0.99056	-0.98731	0	4.2e-05	0.000257	0.004602	0.000814	0.000166	2.9e-05	0.000353	0.104949	0.44748	0.11883	0.027505	0.007685	0.009307	0.016092
>gi|16128567|ref|NP_415116.1| iron-enterobactin outer membrane transporter [Escherichia coli str. K-12 substr. MG1655]	0.913458	-0.877264	-0.818471	-0.919935	-0.952297	-0.938554	-0.985366	-0.970903	0.723593	0.54454	0.251328	0.116373	-0.250575	-0.273551	-0.309792	0	0.140444	0.214308	0.083044	0.046906	0.038851	0.011457	0.021213	0.261398	0.079877	0.344155	0.275417	0.306818	0.246367	0.197353
>gi|16128568|ref|NP_415117.1| enterobactin/ferric enterobactin esterase [Escherichia coli str. K-12 substr. MG1655]	-0.807397	-0.999997	-0.999886	-0.993947	-0.999778	-0.99974	-0.999895	-0.999647	-0.014332	-0.589147	-0.554351	-0.715325	-0.844743	-0.92333	-0.888582	0	3e-06	0.000137	0.01894	0.000672	0.000329	0.000177	0.000421	0.221934	0.345937	0.394301	0.288665	0.212145	0.100286	0.111064
>gi|94541099|ref|YP_588441.1| conserved protein [Escherichia coli str. K-12 substr. MG1655]	-0.366893	-0.997272	-0.907051	-0.978225	-0.991161	-0.886656	-0.990495	-0.990839	0.138449	-0.503045	-0.520454	-0.742226	-0.61237	-0.622904	-0.785922	0	0.003613	0.279144	0.030193	0.02016	0.343933	0.019515	0.021944	0.73892	0.361007	0.635921	0.221093	0.593916	0.461114	0.235275
>gi|16128569|ref|NP_415118.1| enterobactin synthase multienzyme complex component, ATP-dependent [Escherichia coli str. K-12 substr. MG1655]	-0.228167	-0.978107	-0.885631	-0.873741	-0.961133	-0.932782	-0.983531	-0.972043	-0.493627	-0.60339	-0.784258	-0.883877	-0.921064	-0.951583	-0.908444	0	0.01714	0.107143	0.12559	0.062789	0.04498	0.013553	0.021738	0.143824	0.264467	0.149187	0.050244	0.065785	0.038972	0.063827
>gi|16128570|ref|NP_415119.1| regulator of length of O-antigen component of lipopolysaccharide chains [Escherichia coli str. K-12 substr. MG1655]	-0.48105	0.27034	0.002978	-0.173574	-0.203453	-0.466702	-0.724966	-0.860873	-0.77421	-0.902866	-0.951949	-0.969041	-0.983249	-0.974143	-0.985991	0	0.497908	0.422955	0.340474	0.480464	0.199419	0.068853	0.205797	0.10095	0.074223	0.042607	0.025307	0.016147	0.02343	0.0152
>gi|16128571|ref|NP_415120.1| iron-enterobactin transporter subunit [Escherichia coli str. K-12 substr. MG1655]	-0.939667	-0.999601	-0.998358	-0.989451	-0.996008	-0.997193	-0.999716	-0.996897	-0.493573	-0.453701	-0.686013	-0.775902	-0.884239	-0.931504	-0.931548	0	0.000394	0.001566	0.026414	0.011488	0.003558	0.000319	0.002867	0.24597	0.287234	0.289244	0.175716	0.100103	0.071872	0.066669
>gi|16128572|ref|NP_415121.1| iron-enterobactin transporter subunit [Escherichia coli str. K-12 substr. MG1655]	-0.994322	-0.999897	-0.997047	-0.993659	-0.999332	-0.988154	-0.999947	-0.999145	0.160658	-0.577835	-0.530014	-0.745379	-0.818302	-0.89484	-0.909304	0	0.000259	0.007675	0.018685	0.002031	0.034597	6.9e-05	0.001231	0.481527	0.43846	0.349004	0.230031	0.250156	0.126013	0.081927
>gi|16128573|ref|NP_415122.1| iron-enterobactin transporter subunit [Escherichia coli str. K-12 substr. MG1655]	-0.942227	-0.99993	-0.99946	-0.995418	-0.999002	-0.992193	-0.999984	-0.999395	-0.268423	-0.696851	-0.598006	-0.892918	-0.907235	-0.886055	-0.904844	0	0.000129	0.001193	0.012446	0.003097	0.022141	3.1e-05	0.000946	0.309025	0.250029	0.518256	0.098782	0.165122	0.217066	0.12001
>gi|16128574|ref|NP_415123.1| enterobactin exporter, iron-regulated [Escherichia coli str. K-12 substr. MG1655]	-0.799125	-0.999992	-0.998924	-0.991108	-0.9994	-0.995703	-0.999949	-0.999437	-0.037492	-0.624135	-0.6071	-0.802809	-0.81969	-0.902398	-0.904871	0	1.2e-05	0.003066	0.027151	0.001787	0.012196	0.000139	0.000799	0.468561	0.269123	0.324065	0.143106	0.229873	0.143082	0.095386
>gi|16128575|ref|NP_415124.1| iron-enterobactin transporter subunit [Escherichia coli str. K-12 substr. MG1655]	-0.95906	-0.738074	-0.880692	-0.796549	-0.941049	-0.921027	-0.983069	-0.981617	-0.57448	-0.763098	-0.703182	-0.914703	-0.873998	-0.967061	-0.888469	0	0.460508	0.132312	0.215352	0.078868	0.058743	0.020811	0.01547	0.484151	0.229707	0.561509	0.067383	0.243703	0.043668	0.11161
>gi|16128576|ref|NP_415125.1| isochorismate synthase 1 [Escherichia coli str. K-12 substr. MG1655]	0.594286	-0.887746	-0.85666	-0.877883	-0.939428	-0.930109	-0.982753	-0.984724	-0.522744	-0.703353	-0.808226	-0.858303	-0.939536	-0.915435	-0.929556	0	0.127589	0.107189	0.073738	0.053703	0.042886	0.011504	0.013441	0.245889	0.240242	0.140273	0.092686	0.030265	0.059832	0.047006
>gi|16128577|ref|NP_415126.1| 2,3-dihydroxybenzoate-AMP ligase component of enterobactin synthase multienzyme complex [Escherichia coli str. K-12 substr. MG1655]	-0.578132	-0.966162	-0.952106	-0.939164	-0.975136	-0.959369	-0.99016	-0.988433	-0.725276	-0.780958	-0.894235	-0.905513	-0.949632	-0.949665	-0.946389	0	0.03335	0.043571	0.041649	0.027601	0.026986	0.00762	0.011475	0.10423	0.107339	0.070501	0.061943	0.027439	0.031254	0.035799
>gi|16128578|ref|NP_415127.1| isochorismatase [Escherichia coli str. K-12 substr. MG1655]	-0.630378	-0.918539	-0.774751	-0.747972	-0.928863	-0.870692	-0.968817	-0.961696	-0.77442	-0.859636	-0.948043	-0.963326	-0.976144	-0.96745	-0.98491	0	0.130026	0.251666	0.238739	0.157414	0.087652	0.043335	0.028112	0.153835	0.136007	0.05007	0.031505	0.02332	0.033029	0.017183
>gi|16128579|ref|NP_415128.1| 2,3-dihydro-2,3-dihydroxybenzoate dehydrogenase [Escherichia coli str. K-12 substr. MG1655]	0.969808	-0.048206	-0.403234	-0.347924	-0.620537	-0.61414	-0.795992	-0.870019	0.066887	-0.272488	-0.636355	-0.532995	-0.787017	-0.764016	-0.717254	0	0.553444	0.442196	0.307113	0.326118	0.170933	0.251324	0.064425	0.397067	0.315744	0.224912	0.183379	0.077959	0.14199	0.105542
>gi|16128580|ref|NP_415129.1| thioesterase required for efficient enterobactin production [Escherichia coli str. K-12 substr. MG1655]	0.106096	-0.999994	-0.999866	-0.997368	-0.999347	-0.999624	-0.999963	-0.999207	-0.146988	-0.181987	-0.556785	-0.552135	-0.515111	-0.637342	-0.654313	0	8e-06	0.000157	0.007775	0.002027	0.000519	9.8e-05	0.001047	0.484639	0.274796	0.379825	0.367426	0.380536	0.235112	0.337676
>gi|16128581|ref|NP_415130.1| carbon starvation protein [Escherichia coli str. K-12 substr. MG1655]	-0.943245	-0.998738	-0.989386	-0.978594	-0.996915	-0.963025	-0.998855	-0.994015	0.005537	-0.538706	-0.676476	-0.829758	-0.856814	-0.909563	-0.929646	0	0.001454	0.012225	0.03141	0.007271	0.073344	0.001097	0.006277	0.560718	0.256694	0.308328	0.137499	0.121605	0.067397	0.053368
>gi|94541100|ref|YP_588442.1| conserved protein, DUF466 family [Escherichia coli str. K-12 substr. MG1655]	-0.203162	-0.961956	-0.877307	-0.778308	-0.915561	-0.860599	-0.992348	-0.900353	-0.602577	-0.58323	-0.720398	-0.771571	-0.725702	-0.676811	-0.634445	0	0.062502	0.219564	0.353884	0.245534	0.239939	0.012877	0.121983	0.312821	0.346693	0.484901	0.307043	0.427208	0.300209	0.541128
>gi|16128582|ref|NP_415132.1| predicted oxidoreductase [Escherichia coli str. K-12 substr. MG1655]	-0.96473	-0.957999	-0.980612	-0.953154	-0.988547	-0.982754	-0.994667	-0.994091	-0.730147	-0.813069	-0.90127	-0.951296	-0.968145	-0.976696	-0.951171	0	0.080176	0.018759	0.071529	0.017106	0.011676	0.004562	0.007031	0.293601	0.109109	0.074986	0.039362	0.039469	0.028881	0.048468
>gi|16128583|ref|NP_415133.1| methionine aminotransferase, PLP-dependent [Escherichia coli str. K-12 substr. MG1655]	-0.975867	-0.990839	-0.988179	-0.973307	-0.992705	-0.989712	-0.997232	-0.995287	-0.876455	-0.881427	-0.963283	-0.982842	-0.990255	-0.99105	-0.984448	0	0.008748	0.013861	0.031561	0.010492	0.006722	0.002961	0.005106	0.114731	0.075148	0.037022	0.013215	0.007233	0.008404	0.015826
>gi|16128584|ref|NP_415134.1| conserved protein [Escherichia coli str. K-12 substr. MG1655]	-0.035238	-0.973472	-0.935191	-0.9577	-0.978595	-0.971961	-0.994534	-0.993433	-0.867061	-0.941219	-0.981296	-0.990481	-0.993849	-0.991489	-0.995072	0	0.05208	0.143378	0.058956	0.036835	0.024325	0.009028	0.00599	0.097501	0.049497	0.013296	0.009926	0.006313	0.009819	0.007902
>gi|16128585|ref|NP_415135.1| conserved protein [Escherichia coli str. K-12 substr. MG1655]	-0.688107	-0.999974	-0.999918	-0.9982	-0.999637	-0.999429	-0.999943	-0.999484	-0.660242	-0.854435	-0.91761	-0.941846	-0.981512	-0.977649	-0.97693	0	4.1e-05	9e-05	0.005176	0.001107	0.001129	9e-05	0.000654	0.249329	0.146127	0.079289	0.058206	0.025631	0.021914	0.034254
>gi|16128586|ref|NP_415136.1| predicted DNA-binding transcriptional regulator [Escherichia coli str. K-12 substr. MG1655]	-0.719809	-0.997638	-0.996674	-0.996531	-0.995481	-0.998711	-0.999908	-0.998737	-0.79314	-0.878505	-0.907644	-0.945215	-0.980727	-0.977131	-0.993196	0	0.002921	0.006149	0.004543	0.009295	0.001287	0.000171	0.002406	0.150173	0.070831	0.132194	0.100039	0.02384	0.023435	0.007856
>gi|90111151|ref|NP_415137.2| thiol:disulfide interchange protein, periplasmic [Escherichia coli str. K-12 substr. MG1655]	-0.829785	-0.961074	-0.900827	-0.898725	-0.931903	-0.918903	-0.990928	-0.977014	-0.556396	-0.825775	-0.930035	-0.960217	-0.983787	-0.960543	-0.98089	0	0.064371	0.128951	0.173429	0.143935	0.072241	0.008339	0.014666	0.238014	0.099881	0.080299	0.02662	0.013433	0.043934	0.011101
>gi|16128588|ref|NP_415138.1| alkyl hydroperoxide reductase, C22 subunit [Escherichia coli str. K-12 substr. MG1655]	-0.741834	-0.741933	-0.902284	-0.880619	-0.929637	-0.958243	-0.989164	-0.989295	-0.123955	-0.280862	-0.433045	-0.617561	-0.734805	-0.632984	-0.706797	0	0.397264	0.0929	0.109048	0.061732	0.02891	0.009977	0.011903	0.27985	0.229386	0.283108	0.190309	0.080016	0.147973	0.107987
>gi|90111152|ref|NP_415139.2| alkyl hydroperoxide reductase, F52a subunit, FAD/NAD(P)-binding [Escherichia coli str. K-12 substr. MG1655]	-0.881695	-0.741933	-0.902284	-0.880619	-0.929637	-0.958243	-0.989164	-0.989295	-0.123955	-0.280862	-0.433045	-0.617561	-0.734805	-0.632984	-0.706797	0	0.397264	0.0929	0.109048	0.061732	0.02891	0.009977	0.011903	0.27985	0.229386	0.283108	0.190309	0.080016	0.147973	0.107987
>gi|16128590|ref|NP_415140.1| universal stress protein UP12 [Escherichia coli str. K-12 substr. MG1655]	-0.998495	-0.999696	-0.99963	-0.974522	-0.999125	-0.999554	-0.999803	-0.999123	-0.950989	-0.910563	-0.959034	-0.986788	-0.995726	-0.991182	-0.996684	0	0.000803	0.00041	0.079152	0.002426	0.00076	0.000444	0.001561	0.054016	0.129132	0.064545	0.021682	0.006049	0.016289	0.005366
>gi|16128591|ref|NP_415141.1| predicted oxidoreductase, Zn-dependent and NAD(P)-binding [Escherichia coli str. K-12 substr. MG1655]	-0.997018	-0.999696	-0.99963	-0.974522	-0.999125	-0.999554	-0.999803	-0.999123	-0.950989	-0.910563	-0.959034	-0.986788	-0.995726	-0.991182	-0.996684	0	0.000803	0.00041	0.079152	0.002426	0.00076	0.000444	0.001561	0.054016	0.129132	0.064545	0.021682	0.006049	0.016289	0.005366
>gi|16128593|ref|NP_415143.1| regulator of nucleoside diphosphate kinase [Escherichia coli str. K-12 substr. MG1655]	-0.607158	-0.992212	-0.923762	-0.895883	-0.938222	-0.939845	-0.997659	-0.962184	-0.360592	-0.284001	-0.527523	-0.547091	-0.781931	-0.778737	-0.86302	0	0.011417	0.127231	0.167907	0.165496	0.095332	0.005297	0.056248	0.427493	0.477546	0.294224	0.502024	0.104614	0.224618	0.274654
>gi|16128594|ref|NP_415144.1| ribonuclease I [Escherichia coli str. K-12 substr. MG1655]	-0.168619	-0.975846	-0.992441	-0.986417	-0.995518	-0.98775	-0.997519	-0.995855	-0.659219	-0.839368	-0.897337	-0.908474	-0.966724	-0.948706	-0.963371	0	0.047066	0.010237	0.011064	0.005693	0.009462	0.00245	0.005321	0.178242	0.106282	0.112955	0.054169	0.02341	0.030533	0.014986
>gi|16128595|ref|NP_415145.1| citrate:succinate antiporter [Escherichia coli str. K-12 substr. MG1655]	-0.960949	-0.999927	-0.999618	-0.995442	-0.999453	-0.991953	-0.999823	-0.999081	0.134967	-0.239193	-0.519262	-0.749086	-0.758815	-0.839816	-0.919772	0	0.000164	0.000645	0.013008	0.001636	0.021603	0.000266	0.001359	0.631129	0.409968	0.307759	0.13803	0.124326	0.136856	0.05876
>gi|16128596|ref|NP_415146.1| 2-(5''-triphosphoribosyl)-3'-dephosphocoenzyme-A synthase [Escherichia coli str. K-12 substr. MG1655]	-0.697901	-0.999927	-0.999618	-0.995442	-0.999453	-0.991953	-0.999823	-0.999081	0.134967	-0.239193	-0.519262	-0.749086	-0.758815	-0.839816	-0.919772	0	0.000164	0.000645	0.013008	0.001636	0.021603	0.000266	0.001359	0.631129	0.409968	0.307759	0.13803	0.124326	0.136856	0.05876
>gi|16128597|ref|NP_415147.1| apo-citrate lyase phosphoribosyl-dephospho-CoA transferase [Escherichia coli str. K-12 substr. MG1655]	-0.974187	-0.999995	-0.999932	-0.995158	-0.999503	-0.999825	-0.999966	-0.999666	-0.888409	-0.900043	-0.948649	-0.976322	-0.993602	-0.989606	-0.994169	0	5e-06	7e-05	0.014965	0.001539	0.000192	5.1e-05	0.000404	0.193812	0.089489	0.051329	0.030363	0.005435	0.016225	0.006182
>gi|16128598|ref|NP_415148.1| citrate lyase, citrate-ACP transferase (alpha) subunit [Escherichia coli str. K-12 substr. MG1655]	-0.911712	-0.999995	-0.999932	-0.995158	-0.999503	-0.999825	-0.999966	-0.999666	-0.888409	-0.900043	-0.948649	-0.976322	-0.993602	-0.989606	-0.994169	0	5e-06	7e-05	0.014965	0.001539	0.000192	5.1e-05	0.000404	0.193812	0.089489	0.051329	0.030363	0.005435	0.016225	0.006182
>gi|90111153|ref|NP_415149.4| citrate lyase, citryl-ACP lyase (beta) subunit [Escherichia coli str. K-12 substr. MG1655]	-0.953707	-0.999995	-0.999932	-0.995158	-0.999503	-0.999825	-0.999966	-0.999666	-0.888409	-0.900043	-0.948649	-0.976322	-0.993602	-0.989606	-0.994169	0	5e-06	7e-05	0.014965	0.001539	0.000192	5.1e-05	0.000404	0.193812	0.089489	0.051329	0.030363	0.005435	0.016225	0.006182
>gi|16128600|ref|NP_415150.1| citrate lyase, acyl carrier (gamma) subunit [Escherichia coli str. K-12 substr. MG1655]	-0.698704	-0.999995	-0.999932	-0.995158	-0.999503	-0.999825	-0.999966	-0.999666	-0.888409	-0.900043	-0.948649	-0.976322	-0.993602	-0.989606	-0.994169	0	5e-06	7e-05	0.014965	0.001539	0.000192	5.1e-05	0.000404	0.193812	0.089489	0.051329	0.030363	0.005435	0.016225	0.006182
>gi|90111154|ref|NP_415151.4| [citrate [pro-3S]-lyase] ligase [Escherichia coli str. K-12 substr. MG1655]	-0.682653	-0.991832	-0.989627	-0.986848	-0.995032	-0.985249	-0.995475	-0.992943	-0.862434	-0.919203	-0.956371	-0.984681	-0.985096	-0.9837	-0.992242	0	0.008006	0.014413	0.01202	0.007413	0.012826	0.006621	0.005867	0.144474	0.055616	0.038614	0.014839	0.022623	0.015974	0.009015
>gi|16128602|ref|NP_415152.1| sensory histidine kinase in two-component regulatory system with citB [Escherichia coli str. K-12 substr. MG1655]	-0.82698	-0.819186	-0.768544	-0.664497	-0.851541	-0.777667	-0.935113	-0.960485	-0.707794	-0.850611	-0.929444	-0.940153	-0.967334	-0.951334	-0.963659	0	0.142289	0.182825	0.22182	0.148382	0.118502	0.057186	0.029137	0.123345	0.0969	0.044598	0.037783	0.025011	0.02821	0.031761
>gi|16128603|ref|NP_415153.1| DNA-binding response regulator in two-component regulatory system with citA [Escherichia coli str. K-12 substr. MG1655]	-0.996343	-0.994576	-0.989196	-0.957321	-0.983963	-0.987583	-0.997041	-0.991268	-0.918589	-0.863013	-0.974001	-0.986252	-0.987674	-0.987142	-0.994211	0	0.009764	0.010776	0.057999	0.041442	0.011682	0.004748	0.009398	0.091739	0.238241	0.021105	0.014907	0.012352	0.012517	0.007173
>gi|16128604|ref|NP_415154.1| anaerobic C4-dicarboxylate transport [Escherichia coli str. K-12 substr. MG1655]	-0.970349	-0.99692	-0.996998	-0.990624	-0.997391	-0.989132	-0.999873	-0.997057	-0.146617	-0.516385	-0.642543	-0.834731	-0.865692	-0.909132	-0.931598	0	0.008592	0.004466	0.014945	0.0064	0.024699	0.000146	0.005147	0.607639	0.341549	0.367853	0.093908	0.134221	0.089753	0.057011
>gi|16128605|ref|NP_415155.1| phospholipid:lipid A palmitoyltransferase [Escherichia coli str. K-12 substr. MG1655]	-0.369102	-0.998963	-0.999404	-0.989149	-0.996742	-0.997034	-0.99916	-0.994431	0.148793	-0.329352	-0.611994	-0.741619	-0.877959	-0.750818	-0.870197	0	0.001852	0.000623	0.030836	0.005379	0.005581	0.00169	0.006966	0.664658	0.487503	0.420183	0.204476	0.073759	0.280965	0.167974
>gi|16128606|ref|NP_415156.1| DNA-binding transcriptional repressor [Escherichia coli str. K-12 substr. MG1655]	0.979122	-0.950995	-0.976742	-0.949026	-0.994681	-0.986769	-0.999776	-0.995478	-0.062299	-0.04532	0.041054	-0.183209	-0.8733	-0.709395	-0.434805	0	0.059072	0.045448	0.099419	0.007164	0.020524	0.000412	0.007039	0.521113	0.543639	0.664125	0.603086	0.086803	0.216543	0.446725
>gi|16128607|ref|NP_415157.1| inner membrane protein associated with chromosome condensation [Escherichia coli str. K-12 substr. MG1655]	0.366663	-0.999837	-0.998777	-0.994695	-0.999834	-0.996949	-0.999876	-0.999333	0.170224	-0.214085	-0.408459	-0.719096	-0.701657	-0.836411	-0.846533	0	0.000216	0.002045	0.01398	0.00045	0.008546	0.000314	0.001068	0.683218	0.579976	0.419027	0.263656	0.253351	0.083501	0.163452
>gi|16128610|ref|NP_415160.1| TatABCE protein translocation system subunit [Escherichia coli str. K-12 substr. MG1655]	-0.264973	-0.818522	-0.885924	-0.763257	-0.825437	-0.843566	-0.993733	-0.97654	-0.900135	-0.859698	-0.863983	-0.942582	-0.985804	-0.943431	-0.980824	0	0.32433	0.194827	0.476134	0.35024	0.120722	0.008013	0.032886	0.125845	0.124389	0.299789	0.095777	0.014907	0.106602	0.016488
>gi|16128611|ref|NP_415161.1| lipoate synthase [Escherichia coli str. K-12 substr. MG1655]	-0.960922	-0.996614	-0.990087	-0.972474	-0.988608	-0.98217	-0.997664	-0.99356	-0.924454	-0.959597	-0.977503	-0.989025	-0.990357	-0.986597	-0.994304	0	0.00428	0.010335	0.035282	0.032305	0.017836	0.004275	0.006495	0.1011	0.051843	0.022082	0.01603	0.011986	0.011336	0.010203
>gi|90111155|ref|NP_415162.4| predicted DNA-binding transcriptional regulator [Escherichia coli str. K-12 substr. MG1655]	-0.70084	-0.950734	-0.956998	-0.954037	-0.981569	-0.973703	-0.99388	-0.994591	-0.668483	-0.696897	-0.865538	-0.954038	-0.97128	-0.976427	-0.984905	0	0.059904	0.059783	0.040962	0.023919	0.021072	0.012919	0.006491	0.394196	0.340401	0.170578	0.058247	0.031958	0.02267	0.016449
>gi|90111156|ref|NP_415163.2| lipoyl-protein ligase [Escherichia coli str. K-12 substr. MG1655]	-0.667132	-0.990702	-0.973704	-0.950881	-0.976404	-0.969532	-0.99559	-0.986803	-0.659279	-0.691925	-0.871486	-0.901113	-0.935534	-0.9327	-0.966596	0	0.011934	0.021618	0.062248	0.063076	0.029455	0.00445	0.010777	0.183688	0.266541	0.074301	0.049406	0.037526	0.085403	0.018291
>gi|16128614|ref|NP_415164.1| conserved protein, UPF0250 family [Escherichia coli str. K-12 substr. MG1655]	-0.310687	-0.70002	-0.631698	-0.739459	-0.647293	-0.759558	-0.838602	-0.844094	-0.022523	-0.0951	-0.613816	-0.628081	-0.708266	-0.752312	-0.898831	0	0.517405	0.331837	0.385115	0.471835	0.169045	0.204621	0.141962	0.423505	0.440812	0.301705	0.267475	0.229621	0.199693	0.079865
>gi|16128615|ref|NP_415165.1| D-alanyl-D-alanine carboxypeptidase (penicillin-binding protein 5) [Escherichia coli str. K-12 substr. MG1655]	0.625804	-0.70002	-0.631698	-0.739459	-0.647293	-0.759558	-0.838602	-0.844094	-0.022523	-0.0951	-0.613816	-0.628081	-0.708266	-0.752312	-0.898831	0	0.517405	0.331837	0.385115	0.471835	0.169045	0.204621	0.141962	0.423505	0.440812	0.301705	0.267475	0.229621	0.199693	0.079865
>gi|16128616|ref|NP_415166.1| septal ring protein, suppressor of prc, minor lipoprotein [Escherichia coli str. K-12 substr. MG1655]	0.436383	-0.737966	-0.804167	-0.854552	-0.89684	-0.760349	-0.981043	-0.950566	0.073431	-0.12429	-0.641097	-0.665654	-0.748794	-0.787443	-0.832093	0	0.419594	0.260321	0.175842	0.178125	0.236239	0.024175	0.04722	0.264751	0.383819	0.180997	0.169402	0.350958	0.281495	0.109556
>gi|16128617|ref|NP_415167.1| cell wall shape-determining protein [Escherichia coli str. K-12 substr. MG1655]	-0.99936	-0.99993	-0.999461	-0.993612	-0.999056	-0.995516	-0.999935	-0.999196	-0.407967	-0.729742	-0.82076	-0.93552	-0.94815	-0.956848	-0.97352	0	0.000211	0.000837	0.018511	0.002878	0.011578	9.9e-05	0.001098	0.45354	0.171465	0.163164	0.047302	0.082852	0.052484	0.024833
>gi|16128618|ref|NP_415168.1| transpeptidase involved in peptidoglycan synthesis (penicillin-binding protein 2) [Escherichia coli str. K-12 substr. MG1655]	-0.386879	-0.99993	-0.999461	-0.993612	-0.999056	-0.995516	-0.999935	-0.999196	-0.407967	-0.729742	-0.82076	-0.93552	-0.94815	-0.956848	-0.97352	0	0.000211	0.000837	0.018511	0.002878	0.011578	9.9e-05	0.001098	0.45354	0.171465	0.163164	0.047302	0.082852	0.052484	0.024833
>gi|16128619|ref|NP_415169.1| 23S rRNA m(3)Psi1915 pseudouridine methyltransferase; SAM-dependent [Escherichia coli str. K-12 substr. MG1655]	-0.964979	-0.99993	-0.999461	-0.993612	-0.999056	-0.995516	-0.999935	-0.999196	-0.407967	-0.729742	-0.82076	-0.93552	-0.94815	-0.956848	-0.97352	0	0.000211	0.000837	0.018511	0.002878	0.011578	9.9e-05	0.001098	0.45354	0.171465	0.163164	0.047302	0.082852	0.052484	0.024833
>gi|90111157|ref|NP_415170.4| ribosome-associated protein [Escherichia coli str. K-12 substr. MG1655]	-0.722942	-0.999964	-0.999198	-0.990688	-0.996863	-0.999511	-0.999964	-0.999089	-0.115409	-0.345384	-0.625653	-0.61402	-0.800917	-0.757536	-0.80086	0	6e-05	0.001595	0.02844	0.00959	0.000671	7.2e-05	0.001468	0.46447	0.402325	0.214209	0.238497	0.168435	0.207983	0.281968
>gi|16128621|ref|NP_415171.1| predicted alpha-ribazole-5'-P phosphatase [Escherichia coli str. K-12 substr. MG1655]	-0.989193	-0.999972	-0.999906	-0.99689	-0.999779	-0.999887	-0.999984	-0.99975	-0.874487	-0.847085	-0.948688	-0.972661	-0.990754	-0.990518	-0.971098	0	7.5e-05	0.00017	0.009422	0.000634	0.000125	3.1e-05	0.000364	0.08013	0.137942	0.053713	0.030698	0.009081	0.013895	0.035264
>gi|16128622|ref|NP_415172.1| nicotinic acid mononucleotide adenylyltransferase, NAD(P)-dependent [Escherichia coli str. K-12 substr. MG1655]	-0.400518	-0.999972	-0.999906	-0.99689	-0.999779	-0.999887	-0.999984	-0.99975	-0.874487	-0.847085	-0.948688	-0.972661	-0.990754	-0.990518	-0.971098	0	7.5e-05	0.00017	0.009422	0.000634	0.000125	3.1e-05	0.000364	0.08013	0.137942	0.053713	0.030698	0.009081	0.013895	0.035264
>gi|16128623|ref|NP_415173.1| DNA polymerase III, delta subunit [Escherichia coli str. K-12 substr. MG1655]	-0.994234	-0.999205	-0.979747	-0.9566	-0.992542	-0.986754	-0.99011	-0.991743	-0.788857	-0.902695	-0.908221	-0.97621	-0.981616	-0.98889	-0.977533	0	0.001217	0.032692	0.10315	0.01888	0.012014	0.026842	0.014604	0.251586	0.111914	0.149686	0.036037	0.029664	0.016846	0.034496
>gi|16128624|ref|NP_415174.1| LPS assembly OM complex LptDE, lipoprotein component [Escherichia coli str. K-12 substr. MG1655]	0.641512	0.2502	0.316497	-0.027497	-0.174712	-0.101862	-0.697456	-0.790774	-0.194151	-0.695621	-0.804488	-0.917787	-0.941714	-0.938327	-0.970804	0	0.642301	0.394511	0.363634	0.704464	0.312512	0.313504	0.139379	0.248222	0.258992	0.200352	0.064911	0.068565	0.071687	0.030799
>gi|16128625|ref|NP_415175.1| leucyl-tRNA synthetase [Escherichia coli str. K-12 substr. MG1655]	-0.517868	-0.071896	-0.301284	-0.339601	-0.490336	-0.53508	-0.69193	-0.778571	0.243525	-0.109098	-0.371996	-0.479366	-0.609171	-0.628628	-0.729024	0	0.523971	0.321065	0.209662	0.379791	0.259074	0.197314	0.103972	0.184647	0.220777	0.333847	0.304089	0.172412	0.092156	0.136787
>gi|16128626|ref|NP_415176.1| conserved protein, DUF1451 family [Escherichia coli str. K-12 substr. MG1655]	-0.66394	-0.999746	-0.994812	-0.983031	-0.990894	-0.993098	-0.998825	-0.989361	-0.681948	-0.699878	-0.760733	-0.906908	-0.89355	-0.859477	-0.946689	0	0.000361	0.008917	0.042371	0.026614	0.006646	0.002467	0.013965	0.1813	0.257517	0.252862	0.069578	0.110147	0.126582	0.060854
>gi|90111158|ref|NP_415177.4| conserved protein [Escherichia coli str. K-12 substr. MG1655]	-0.992622	-0.944056	-0.978752	-0.963037	-0.987098	-0.991566	-0.993617	-0.988292	-0.527998	-0.697128	-0.895039	-0.836672	-0.957135	-0.952226	-0.907013	0	0.064942	0.042785	0.063395	0.027077	0.00981	0.016032	0.017706	0.30791	0.1905	0.119734	0.158892	0.038222	0.043948	0.134784
>gi|16128628|ref|NP_415178.1| predicted protein [Escherichia coli str. K-12 substr. MG1655]	-0.161666	-0.999596	-0.999801	-0.995168	-0.999508	-0.999346	-0.999949	-0.997855	-0.050073	-0.146541	-0.452521	-0.428721	-0.700941	-0.549583	-0.686403	0	0.000869	0.000241	0.012453	0.001485	0.000802	7.4e-05	0.003749	0.546134	0.348074	0.524445	0.468351	0.175725	0.274772	0.389712
>gi|16128629|ref|NP_415179.1| predicted co-chaperone [Escherichia coli str. K-12 substr. MG1655]	-0.932593	-0.999288	-0.997363	-0.989401	-0.994621	-0.994792	-0.99939	-0.994727	-0.656027	-0.639175	-0.788033	-0.818345	-0.938352	-0.952467	-0.953459	0	0.001439	0.002515	0.020136	0.016284	0.005706	0.001047	0.007506	0.193326	0.466663	0.288825	0.244003	0.075315	0.038189	0.050227
>gi|16128630|ref|NP_415180.1| conserved protein, Sel1 family [Escherichia coli str. K-12 substr. MG1655]	-0.998124	-0.999328	-0.999433	-0.992499	-0.998606	-0.999505	-0.999961	-0.999174	-0.874964	-0.924107	-0.967374	-0.953711	-0.987911	-0.986256	-0.978073	0	0.001152	0.000774	0.019568	0.004221	0.000677	4.6e-05	0.001147	0.098569	0.061378	0.038235	0.068854	0.016418	0.023336	0.026685
>gi|16128631|ref|NP_415181.1| conserved protein, DUF1266 family [Escherichia coli str. K-12 substr. MG1655]	-0.733267	-0.999881	-0.99987	-0.994817	-0.999702	-0.999728	-0.999968	-0.998961	0.312947	0.175031	-0.353438	-0.070938	-0.517579	-0.401934	-0.534977	0	0.000172	0.000221	0.01567	0.000895	0.000342	4.8e-05	0.001634	0.562968	0.512798	0.620729	0.526182	0.195989	0.236862	0.435997
>gi|16128632|ref|NP_415182.1| Hsc56 co-chaperone of HscC [Escherichia coli str. K-12 substr. MG1655]	-0.779582	-0.998847	-0.995961	-0.986281	-0.994266	-0.994495	-0.99937	-0.993295	-0.365243	-0.601993	-0.68241	-0.721766	-0.90287	-0.858516	-0.875147	0	0.001987	0.005144	0.02824	0.017358	0.006214	0.001309	0.010123	0.332227	0.255671	0.296071	0.208377	0.051463	0.105862	0.132192
>gi|16128633|ref|NP_415183.1| Hsp70 family chaperone Hsc62, binds to RpoD and inhibits transcription [Escherichia coli str. K-12 substr. MG1655]	0.069036	-0.450228	-0.608713	-0.642031	-0.767485	-0.811686	-0.946928	-0.963388	-0.464455	-0.674326	-0.780682	-0.844498	-0.920676	-0.9096	-0.954715	0	0.270575	0.278995	0.167228	0.139937	0.104334	0.037423	0.033049	0.155786	0.174645	0.092755	0.071838	0.045117	0.040248	0.027537
>gi|16128634|ref|NP_415184.1| ribonucleoside hydrolase 1 [Escherichia coli str. K-12 substr. MG1655]	-0.837725	-0.941393	-0.881102	-0.880975	-0.955684	-0.911038	-0.989683	-0.974699	0.161522	-0.101685	-0.502985	-0.531619	-0.662561	-0.781881	-0.840503	0	0.077198	0.139846	0.164802	0.115146	0.11602	0.012339	0.022368	0.311559	0.334642	0.201405	0.13938	0.162228	0.120151	0.102603
>gi|16128635|ref|NP_415185.1| glutamate and aspartate transporter subunit [Escherichia coli str. K-12 substr. MG1655]	-0.990866	-0.845944	-0.765348	-0.71818	-0.903782	-0.790469	-0.961786	-0.966675	-0.812767	-0.828662	-0.859096	-0.948054	-0.965651	-0.937882	-0.976083	0	0.118098	0.226241	0.340957	0.166173	0.155625	0.04704	0.029208	0.179815	0.150741	0.118922	0.047283	0.028861	0.042121	0.034338
>gi|16128636|ref|NP_415186.1| glutamate and aspartate transporter subunit [Escherichia coli str. K-12 substr. MG1655]	-0.962554	-0.999127	-0.993691	-0.9818	-0.996127	-0.973646	-0.998151	-0.993066	-0.261763	-0.636641	-0.824676	-0.920364	-0.955729	-0.931881	-0.962523	0	0.001279	0.008834	0.033484	0.009587	0.05002	0.003362	0.01044	0.427363	0.36744	0.159225	0.05669	0.049897	0.076301	0.042147
>gi|16128637|ref|NP_415187.1| glutamate and aspartate transporter subunit [Escherichia coli str. K-12 substr. MG1655]	-0.789245	-0.999601	-0.99221	-0.987773	-0.99733	-0.971647	-0.998805	-0.99524	-0.080902	-0.583152	-0.749525	-0.88235	-0.939361	-0.909209	-0.945672	0	0.000532	0.009103	0.017802	0.006155	0.054482	0.001097	0.00566	0.550763	0.294622	0.197064	0.081773	0.043974	0.093048	0.056189
>gi|16128638|ref|NP_415188.1| glutamate and aspartate transporter subunit [Escherichia coli str. K-12 substr. MG1655]	0.754974	0.257734	0.033746	-0.166002	-0.35692	-0.311179	-0.840122	-0.915122	-0.803699	-0.903193	-0.969863	-0.975152	-0.989544	-0.981368	-0.991102	0	0.490429	0.448518	0.325161	0.39967	0.336844	0.101649	0.053816	0.135033	0.079604	0.034899	0.017777	0.011542	0.018848	0.009595
>gi|16128639|ref|NP_415189.1| IS5 transposase and trans-activator [Escherichia coli str. K-12 substr. MG1655]	-0.744568	-0.998613	-0.994676	-0.986873	-0.997403	-0.997758	-0.999282	-0.99762	-0.879701	-0.959683	-0.990406	-0.996298	-0.996596	-0.995505	-0.995853	0	0.003257	0.009412	0.032106	0.006135	0.00217	0.001499	0.003123	0.126844	0.040309	0.012338	0.004871	0.003903	0.006146	0.008357
>gi|16128640|ref|NP_415190.1| apolipoprotein N-acyltransferase [Escherichia coli str. K-12 substr. MG1655]	-0.036447	-0.999519	-0.99361	-0.985147	-0.996804	-0.978102	-0.998325	-0.995877	-0.043747	-0.531613	-0.66513	-0.852194	-0.847451	-0.911801	-0.932746	0	0.000535	0.010045	0.020742	0.007612	0.035679	0.001672	0.004737	0.262955	0.403545	0.31404	0.148511	0.212992	0.118558	0.078363
>gi|16128641|ref|NP_415191.1| predicteed ion transport [Escherichia coli str. K-12 substr. MG1655]	-0.997164	-0.995355	-0.972954	-0.884121	-0.951355	-0.983632	-0.997697	-0.989195	-0.69954	-0.805414	-0.917922	-0.94254	-0.925514	-0.914874	-0.972142	0	0.008658	0.070835	0.197509	0.125894	0.014116	0.005184	0.017744	0.342	0.18305	0.06969	0.050852	0.079183	0.070973	0.027442
>gi|16128642|ref|NP_415192.1| metal-binding heat shock protein required for rRNA maturation [Escherichia coli str. K-12 substr. MG1655]	-0.932027	-0.999925	-0.997636	-0.981339	-0.980984	-0.998876	-0.99999	-0.995348	-0.171129	0.121571	-0.226331	-0.450975	-0.64424	-0.562978	-0.787314	0	0.00019	0.007329	0.05741	0.059559	0.00201	2.7e-05	0.006388	0.436448	0.511095	0.535713	0.465173	0.21304	0.335734	0.268034
>gi|145698230|ref|NP_415193.2| predicted protein with nucleoside triphosphate hydrolase domain [Escherichia coli str. K-12 substr. MG1655]	-0.915656	0.252377	0.337301	0.310449	0.103337	-0.048672	-0.458699	-0.684229	-0.922514	-0.954609	-0.9784	-0.988559	-0.989238	-0.98662	-0.99498	0	0.607498	0.56265	0.339595	0.418315	0.377932	0.233446	0.11973	0.0656	0.043007	0.020005	0.013616	0.010831	0.01539	0.007013
>gi|16128644|ref|NP_415194.1| tRNA-i(6)A37 methylthiotransferase [Escherichia coli str. K-12 substr. MG1655]	-0.434588	0.252377	0.337301	0.310449	0.103337	-0.048672	-0.458699	-0.684229	-0.922514	-0.954609	-0.9784	-0.988559	-0.989238	-0.98662	-0.99498	0	0.607498	0.56265	0.339595	0.418315	0.377932	0.233446	0.11973	0.0656	0.043007	0.020005	0.013616	0.010831	0.01539	0.007013
>gi|16128645|ref|NP_415195.1| 2-octaprenyl-3-methyl-6-methoxy-1,4-benzoquinol oxygenase [Escherichia coli str. K-12 substr. MG1655]	-0.661073	-0.999282	-0.990534	-0.966174	-0.994997	-0.991451	-0.998223	-0.994684	-0.792342	-0.86188	-0.950797	-0.967377	-0.97994	-0.984681	-0.966983	0	0.000954	0.013098	0.080514	0.011419	0.007362	0.002563	0.005298	0.086066	0.087478	0.044476	0.026378	0.030526	0.023047	0.044482
>gi|16128650|ref|NP_415200.1| asparagine synthetase B [Escherichia coli str. K-12 substr. MG1655]	-0.97359	-0.995462	-0.995556	-0.975118	-0.994622	-0.994174	-0.998753	-0.995436	-0.838077	-0.875024	-0.94001	-0.947991	-0.975318	-0.96626	-0.978645	0	0.00638	0.006433	0.046346	0.013984	0.005804	0.001379	0.00552	0.107337	0.069936	0.048704	0.029193	0.019459	0.021489	0.017331
>gi|16128651|ref|NP_415201.1| UMP phosphatase [Escherichia coli str. K-12 substr. MG1655]	-0.761868	-0.959951	-0.95886	-0.894093	-0.971836	-0.952918	-0.993772	-0.988401	0.103101	-0.332033	-0.534134	-0.620261	-0.721585	-0.756633	-0.810448	0	0.040156	0.048352	0.121557	0.039294	0.039963	0.009825	0.010362	0.159428	0.261365	0.179747	0.130765	0.100511	0.095536	0.076458
>gi|16128652|ref|NP_415202.1| DNA-binding transcriptional dual regulator, repressor of N-acetylglucosamine [Escherichia coli str. K-12 substr. MG1655]	-0.999031	-0.997751	-0.999434	-0.996768	-0.998369	-0.998652	-0.999766	-0.999258	-0.912526	-0.897429	-0.967597	-0.984389	-0.991895	-0.991036	-0.990283	0	0.005254	0.000875	0.006869	0.004809	0.001267	0.000365	0.001029	0.085821	0.072338	0.023139	0.014104	0.006614	0.007682	0.011186
>gi|16128653|ref|NP_415203.1| N-acetylglucosamine-6-phosphate deacetylase [Escherichia coli str. K-12 substr. MG1655]	-0.962718	-0.916984	-0.91739	-0.93391	-0.963899	-0.937047	-0.990323	-0.981768	-0.215913	-0.511089	-0.583209	-0.684003	-0.78573	-0.763527	-0.842065	0	0.052674	0.089188	0.055534	0.04813	0.044146	0.008423	0.013336	0.307862	0.219199	0.186451	0.121665	0.100422	0.136451	0.189973
>gi|16128654|ref|NP_415204.1| glucosamine-6-phosphate deaminase [Escherichia coli str. K-12 substr. MG1655]	-0.8978	-0.962114	-0.955406	-0.955347	-0.978413	-0.97745	-0.996045	-0.988266	-0.714986	-0.804467	-0.815683	-0.928123	-0.94949	-0.941481	-0.973588	0	0.040746	0.059776	0.038482	0.027194	0.016172	0.002691	0.011903	0.223915	0.119099	0.189369	0.046691	0.050493	0.031705	0.024921
>gi|16128655|ref|NP_415205.1| fused N-acetyl glucosamine specific PTS enzyme: IIC, IIB , and IIA components [Escherichia coli str. K-12 substr. MG1655]	-0.734188	-0.862822	-0.853696	-0.81904	-0.960028	-0.899279	-0.989909	-0.9802	-0.164823	-0.533403	-0.676152	-0.796058	-0.848285	-0.901158	-0.87268	0	0.145444	0.095694	0.167613	0.041959	0.093698	0.010759	0.016757	0.487893	0.323762	0.2448	0.151563	0.089562	0.049167	0.065094
>gi|16128656|ref|NP_415206.1| glutamyl-tRNA synthetase [Escherichia coli str. K-12 substr. MG1655]	-0.595111	-0.941817	-0.979423	-0.957104	-0.986355	-0.974635	-0.992125	-0.988557	-0.763785	-0.866842	-0.913346	-0.943915	-0.960654	-0.953869	-0.980982	0	0.099484	0.019499	0.038962	0.025085	0.016904	0.007066	0.010231	0.13987	0.066539	0.059743	0.034541	0.036084	0.023073	0.017464
>gi|16128657|ref|NP_415207.1| chitoporin, uptake of chitosugars [Escherichia coli str. K-12 substr. MG1655]	-0.788556	-0.391248	-0.901033	-0.766033	-0.905966	-0.944741	-0.990741	-0.964663	0.299769	0.117435	-0.304191	-0.295195	-0.632943	-0.374359	-0.680076	0	0.711721	0.075639	0.22292	0.154019	0.068628	0.010096	0.039198	0.438737	0.481938	0.510211	0.462792	0.240129	0.199537	0.298931
>gi|16128658|ref|NP_415208.1| novel lipoprotein induced by chitosugars [Escherichia coli str. K-12 substr. MG1655]	0.111703	-0.974895	-0.978902	-0.979699	-0.99206	-0.980943	-0.998716	-0.99043	-0.95524	-0.945157	-0.993416	-0.986881	-0.995433	-0.983351	-0.995534	0	0.060185	0.041907	0.028595	0.019183	0.019229	0.00138	0.015302	0.034572	0.103183	0.006396	0.019189	0.004472	0.034829	0.00604
>gi|16128659|ref|NP_415209.1| DNA-binding transcriptional dual regulator of siderophore biosynthesis and transport [Escherichia coli str. K-12 substr. MG1655]	-0.917868	-0.999996	-0.999994	-0.997946	-0.999302	-0.999952	-0.999997	-0.999867	-0.933071	-0.765743	-0.978622	-0.990785	-0.984905	-0.987702	-0.995189	0	6e-06	8e-06	0.006288	0.002201	9.9e-05	6e-06	0.000279	0.092276	0.617916	0.0225	0.012759	0.018705	0.019843	0.005903
>gi|157783150|ref|YP_001491546.1| ryhB-regulated fur leader peptide [Escherichia coli str. K-12 substr. MG1655]	0.364339	-0.914059	-0.981742	-0.993706	-0.99443	-0.99728	-0.999607	-0.997444	-0.278259	-0.477629	-0.638792	-0.838341	-0.830996	-0.921935	-0.970415	0	0.181707	0.032889	0.007748	0.011299	0.003727	0.0007	0.00582	0.60736	0.628045	0.666261	0.297205	0.469104	0.196093	0.049799
>gi|16128660|ref|NP_415210.1| flavodoxin 1 [Escherichia coli str. K-12 substr. MG1655]	-0.98861	-0.999579	-0.999235	-0.990293	-0.996402	-0.998591	-0.999966	-0.998269	0.068067	0.021387	-0.335067	-0.339009	-0.6182	-0.527484	-0.554845	0	0.000691	0.001561	0.021803	0.011211	0.002745	4.8e-05	0.002408	0.346667	0.495245	0.459806	0.350273	0.288639	0.350236	0.264826
>gi|90111159|ref|NP_415211.2| LexA-regulated conserved protein [Escherichia coli str. K-12 substr. MG1655]	-0.110189	-0.822373	-0.582484	-0.675626	-0.889935	-0.764027	-0.992782	-0.903486	-0.725376	-0.892039	-0.983215	-0.98197	-0.993388	-0.995341	-0.991812	0	0.529634	0.64248	0.421569	0.226021	0.277554	0.010792	0.104788	0.333573	0.293938	0.026968	0.033017	0.007138	0.006192	0.014644
>gi|16128662|ref|NP_415212.1| acyl-CoA esterase in vitro [Escherichia coli str. K-12 substr. MG1655]	-0.992969	-0.989962	-0.984779	-0.956245	-0.990766	-0.992146	-0.996635	-0.996558	-0.851589	-0.944426	-0.986451	-0.993258	-0.998078	-0.997761	-0.996941	0	0.021649	0.028528	0.085778	0.019315	0.009154	0.004916	0.005092	0.350062	0.043469	0.016314	0.010017	0.001845	0.003721	0.004915
>gi|16128663|ref|NP_415213.1| regulatory protein for replication initiation [Escherichia coli str. K-12 substr. MG1655]	-0.739463	-0.959412	-0.937832	-0.952521	-0.957337	-0.965113	-0.995713	-0.985072	-0.868507	-0.928243	-0.955984	-0.988282	-0.99195	-0.983754	-0.994352	0	0.035047	0.064566	0.052017	0.058262	0.022161	0.003667	0.01418	0.126376	0.0519	0.036725	0.009974	0.008038	0.019209	0.008244
>gi|16128664|ref|NP_415214.1| phosphoglucomutase [Escherichia coli str. K-12 substr. MG1655]	-0.857647	-0.689437	-0.89189	-0.885545	-0.893484	-0.95472	-0.988085	-0.990108	-0.523773	-0.702394	-0.802982	-0.807605	-0.90713	-0.915842	-0.90216	0	0.218727	0.093086	0.085303	0.118885	0.025468	0.007724	0.006792	0.175415	0.181629	0.078852	0.058146	0.040314	0.043069	0.050938
>gi|16128665|ref|NP_415215.1| lipoprotein [Escherichia coli str. K-12 substr. MG1655]	0.986633	-0.999708	-0.999344	-0.998134	-0.997288	-0.997184	-0.999803	-0.998817	0.307885	-0.075925	-0.07518	-0.233768	-0.646754	-0.43743	-0.627095	0	0.000341	0.000572	0.003083	0.006418	0.003614	0.000265	0.001231	0.191531	0.331525	0.333772	0.204809	0.118369	0.231706	0.285287
>gi|16128668|ref|NP_415219.1| putrescine/proton symporter: putrescine/ornithine antiporter [Escherichia coli str. K-12 substr. MG1655]	0.404405	-0.999187	-0.998926	-0.995957	-0.999129	-0.994232	-0.999907	-0.998355	0.394344	0.07333	-0.332821	-0.59013	-0.654421	-0.69024	-0.813186	0	0.001799	0.001277	0.008797	0.002371	0.012675	0.000117	0.002875	0.598597	0.486055	0.465049	0.173243	0.159572	0.1287	0.090403
>gi|16128669|ref|NP_415220.1| ornithine decarboxylase isozyme, inducible [Escherichia coli str. K-12 substr. MG1655]	-0.541065	-0.993148	-0.991209	-0.978199	-0.993023	-0.986404	-0.997663	-0.993351	-0.866139	-0.882963	-0.953094	-0.96536	-0.97116	-0.960613	-0.982245	0	0.008994	0.011156	0.024598	0.015942	0.010558	0.002308	0.008705	0.105324	0.081502	0.036952	0.021834	0.024277	0.026734	0.010444
>gi|145698231|ref|YP_001165310.1| hypothetical protein b4590 [Escherichia coli str. K-12 substr. MG1655]	-0.953662	-0.999985	-0.99996	-0.998145	-0.999176	-0.999874	-0.999999	-0.99958	-0.567529	-0.480959	-0.659286	-0.765958	-0.8645	-0.830907	-0.946385	0	2.7e-05	8.9e-05	0.005625	0.002568	0.000241	2e-06	0.000823	0.394986	0.415121	0.302887	0.187793	0.079013	0.222464	0.039961
>gi|16128670|ref|NP_415222.1| DNA-binding response regulator in two-component regulatory system with KdpD [Escherichia coli str. K-12 substr. MG1655]	-0.998914	-0.982921	-0.920834	-0.849218	-0.970766	-0.945848	-0.986286	-0.980349	-0.899648	-0.902787	-0.946316	-0.982532	-0.989396	-0.986323	-0.989735	0	0.027071	0.128627	0.188854	0.054704	0.064179	0.01342	0.017319	0.067439	0.050595	0.054704	0.017872	0.008387	0.017924	0.014339
>gi|16128671|ref|NP_415223.1| fused sensory histidine kinase in two-component regulatory system with KdpE: signal sensing protein [Escherichia coli str. K-12 substr. MG1655]	-0.860531	-0.984606	-0.933847	-0.894393	-0.975275	-0.941948	-0.989485	-0.981375	-0.801109	-0.857149	-0.912044	-0.958694	-0.980832	-0.980922	-0.979447	0	0.020347	0.063447	0.133103	0.035606	0.063576	0.007802	0.01418	0.092334	0.089941	0.077453	0.034377	0.018617	0.022474	0.019945
>gi|16128672|ref|NP_415224.1| potassium translocating ATPase, subunit C [Escherichia coli str. K-12 substr. MG1655]	0.79316	-0.766433	-0.893782	-0.923289	-0.979062	-0.923167	-0.993943	-0.987725	-0.014719	-0.400576	-0.417562	-0.768373	-0.774372	-0.897908	-0.784319	0	0.422321	0.098553	0.104015	0.024543	0.062014	0.00459	0.008896	0.317386	0.402468	0.429992	0.184718	0.328181	0.188746	0.195364
>gi|16128673|ref|NP_415225.1| potassium translocating ATPase, subunit B [Escherichia coli str. K-12 substr. MG1655]	-0.487552	-0.885834	-0.859227	-0.888525	-0.95981	-0.895137	-0.993768	-0.987359	-0.308145	-0.676764	-0.768224	-0.886911	-0.931609	-0.939618	-0.93845	0	0.12439	0.205611	0.078846	0.049976	0.110732	0.003844	0.008991	0.208346	0.306596	0.235817	0.089646	0.081274	0.059841	0.05524
>gi|16128674|ref|NP_415226.1| potassium translocating ATPase, subunit A [Escherichia coli str. K-12 substr. MG1655]	0.187153	-0.998684	-0.984364	-0.974814	-0.99634	-0.970297	-0.999503	-0.993478	0.376096	-0.234123	-0.447401	-0.603425	-0.617327	-0.740867	-0.748561	0	0.001571	0.018858	0.041014	0.008408	0.058518	0.000462	0.008359	0.467024	0.379658	0.37657	0.287057	0.199906	0.139808	0.200301
>gi|94541101|ref|YP_588443.1| potassium ion accessory transporter subunit [Escherichia coli str. K-12 substr. MG1655]	-0.982093	-0.970625	-0.81107	-0.896428	-0.97902	-0.787434	-0.996125	-0.848324	0.518585	0.394083	0.189009	-0.000597	0.267518	0.006567	-0.020345	0	0.082166	0.370864	0.164404	0.042084	0.38246	0.005779	0.175851	0.504718	0.469303	0.486653	0.53938	0.49467	0.742424	0.443204
>gi|16128675|ref|NP_415228.1| predicted protein [Escherichia coli str. K-12 substr. MG1655]	-0.996195	-0.982403	-0.973263	-0.91281	-0.960304	-0.924226	-0.963463	-0.947837	-0.516203	-0.910896	-0.943889	-0.970925	-0.987041	-0.984394	-0.987779	0	0.023462	0.060798	0.191472	0.068318	0.089783	0.101216	0.08022	0.430294	0.084289	0.077018	0.037631	0.025463	0.019956	0.013653
>gi|16128676|ref|NP_415229.1| rhsC element core protein RshC [Escherichia coli str. K-12 substr. MG1655]	0.696313	-0.998944	-0.998964	-0.99571	-0.998259	-0.998191	-0.999347	-0.99808	-0.097889	-0.35071	-0.534291	-0.540433	-0.782721	-0.851704	-0.810084	0	0.00105	0.001003	0.009271	0.004374	0.001707	0.000935	0.002279	0.224837	0.186982	0.27526	0.197553	0.182119	0.153752	0.136465
>gi|16128677|ref|NP_415230.1| predicted membrane protein [Escherichia coli str. K-12 substr. MG1655]	-0.997966	-0.999565	-0.998577	-0.999151	-0.998571	-0.998712	-0.999694	-0.999162	-0.392234	-0.677321	-0.693322	-0.904033	-0.97052	-0.91944	-0.955382	0	0.001326	0.003091	0.001848	0.0045	0.003499	0.000706	0.001522	0.527683	0.324565	0.584004	0.085714	0.025208	0.109834	0.065631
>gi|16128679|ref|NP_415232.1| predicted protein [Escherichia coli str. K-12 substr. MG1655]	-0.790695	-0.991179	-0.996733	-0.991234	-0.996468	-0.991721	-0.999389	-0.99675	-0.834347	-0.940357	-0.972407	-0.985157	-0.987677	-0.979005	-0.991684	0	0.013907	0.00397	0.010618	0.008113	0.009754	0.000812	0.004434	0.142641	0.048471	0.034528	0.0139	0.015473	0.027819	0.012009
>gi|16128681|ref|NP_415234.1| conserved protein [Escherichia coli str. K-12 substr. MG1655]	-0.99905	-0.999872	-0.999908	-0.998356	-0.998951	-0.999871	-0.999988	-0.999721	-0.931046	-0.782407	-0.965877	-0.978717	-0.985507	-0.981815	-0.992771	0	0.000305	0.000155	0.004395	0.003286	0.00021	1.6e-05	0.000462	0.053679	0.519592	0.02681	0.022237	0.012065	0.0146	0.008094
>gi|16128682|ref|NP_415235.1| conserved protein, DUF1722 family [Escherichia coli str. K-12 substr. MG1655]	-0.907537	-0.999956	-0.999877	-0.993645	-0.99885	-0.999543	-0.999877	-0.998899	-0.903498	-0.969932	-0.995662	-0.998396	-0.998367	-0.998295	-0.997785	0	7.3e-05	0.000112	0.019087	0.003396	0.000569	0.000236	0.001712	0.197013	0.037949	0.007872	0.001736	0.002514	0.002946	0.003832
>gi|16128683|ref|NP_415236.1| deoxyribodipyrimidine photolyase, FAD-binding [Escherichia coli str. K-12 substr. MG1655]	-0.694718	-0.998989	-0.99582	-0.988147	-0.997245	-0.995305	-0.998695	-0.997354	-0.752255	-0.866754	-0.942632	-0.961517	-0.988527	-0.987833	-0.966792	0	0.001055	0.004605	0.029518	0.004002	0.003585	0.002076	0.002515	0.111247	0.1289	0.062838	0.033512	0.007529	0.009942	0.031423
>gi|16128684|ref|NP_415237.1| dipeptide and tripeptide permease D [Escherichia coli str. K-12 substr. MG1655]	-0.971688	-0.999941	-0.998817	-0.996251	-0.999497	-0.995579	-0.999865	-0.998645	-0.21596	-0.573069	-0.763402	-0.838294	-0.913787	-0.855711	-0.930015	0	7.6e-05	0.002249	0.009267	0.001458	0.010156	0.00015	0.001957	0.545694	0.259691	0.18227	0.085611	0.071631	0.18776	0.065076
>gi|16128685|ref|NP_415238.1| conserved metal-binding protein, NIF3 family [Escherichia coli str. K-12 substr. MG1655]	-0.772167	-0.999633	-0.9979	-0.982796	-0.997644	-0.998236	-0.999861	-0.998637	0.311178	-0.164437	-0.190455	-0.27172	-0.619175	-0.801738	-0.65411	0	0.000503	0.002621	0.052342	0.007055	0.002474	0.000159	0.001559	0.2494	0.269446	0.331496	0.331369	0.230454	0.136251	0.295374
>gi|16128686|ref|NP_415239.1| predicted enzyme subunit [Escherichia coli str. K-12 substr. MG1655]	-0.011018	-0.999888	-0.993559	-0.982518	-0.994541	-0.989452	-0.999454	-0.994445	0.016845	-0.082365	-0.573955	-0.57325	-0.81895	-0.873993	-0.866125	0	0.000123	0.00967	0.051088	0.017032	0.022577	0.000994	0.006362	0.348813	0.436476	0.387757	0.361512	0.146833	0.120838	0.187274
>gi|16128687|ref|NP_415240.1| predicted enzyme subunit [Escherichia coli str. K-12 substr. MG1655]	0.213532	-0.999951	-0.99948	-0.995184	-0.998808	-0.998901	-0.999849	-0.999255	-0.656827	-0.80128	-0.91303	-0.939515	-0.965731	-0.972196	-0.953935	0	0.000104	0.000678	0.01325	0.003558	0.001691	0.000356	0.000883	0.121329	0.183742	0.099714	0.037771	0.04544	0.030745	0.046918
>gi|16128688|ref|NP_415241.1| conserved protein, UPF0271 family [Escherichia coli str. K-12 substr. MG1655]	-0.937528	-0.996845	-0.994441	-0.979408	-0.993232	-0.993921	-0.99949	-0.995989	-0.907227	-0.886363	-0.958538	-0.967145	-0.981265	-0.981259	-0.985608	0	0.004985	0.009032	0.035767	0.015717	0.004259	0.000599	0.004406	0.077875	0.08523	0.044046	0.028288	0.022051	0.018224	0.014652
>gi|16128689|ref|NP_415242.1| endonuclease VIII/ 5-formyluracil/5-hydroxymethyluracil DNA glycosylase [Escherichia coli str. K-12 substr. MG1655]	-0.920013	-0.998525	-0.997134	-0.988389	-0.997847	-0.995306	-0.997495	-0.99715	-0.865682	-0.898603	-0.954041	-0.97519	-0.986679	-0.986747	-0.978137	0	0.001997	0.004059	0.024022	0.005024	0.004549	0.004808	0.003229	0.083224	0.077739	0.049382	0.028456	0.012137	0.01538	0.025295
>gi|90111163|ref|NP_415243.4| regulator of aidB expression; inner membrane protein [Escherichia coli str. K-12 substr. MG1655]	-0.985185	-0.999973	-0.997087	-0.995301	-0.999042	-0.994719	-0.99989	-0.998955	-0.063465	-0.607887	-0.658528	-0.839259	-0.825576	-0.927497	-0.951013	0	3.2e-05	0.004699	0.012078	0.002826	0.014619	0.000177	0.001631	0.524329	0.362057	0.213465	0.126318	0.23016	0.086421	0.035512
>gi|90111164|ref|NP_415244.4| predicted fimbrial-like adhesin protein [Escherichia coli str. K-12 substr. MG1655]	0.942826	-0.910482	-0.975741	-0.945659	-0.975559	-0.957537	-0.998417	-0.979958	0.633452	0.510861	0.140239	0.108697	-0.110882	-0.193613	-0.385293	0	0.071302	0.017895	0.062944	0.046601	0.041457	0.00151	0.025352	0.197071	0.196289	0.316154	0.235002	0.295627	0.340556	0.223676
>gi|16128692|ref|NP_415245.1| predicted periplasmic pilus chaperone [Escherichia coli str. K-12 substr. MG1655]	0.211481	-0.861306	-0.697597	-0.724524	-0.819375	-0.760149	-0.943311	-0.940664	-0.462884	-0.872199	-0.93057	-0.941357	-0.978012	-0.97304	-0.980927	0	0.153529	0.268883	0.161576	0.267697	0.137127	0.062377	0.053679	0.268699	0.058799	0.095716	0.055271	0.016943	0.027222	0.019785
>gi|90111165|ref|NP_415246.2| predicted outer membrane protein [Escherichia coli str. K-12 substr. MG1655]	0.47867	-0.960167	-0.991805	-0.985603	-0.994377	-0.995316	-0.999535	-0.99749	0.469479	0.078033	-0.223509	-0.435882	-0.696152	-0.706371	-0.750753	0	0.0324	0.008133	0.024576	0.006457	0.00419	0.000496	0.003334	0.256813	0.41944	0.448385	0.279024	0.096023	0.154263	0.066426
>gi|16128694|ref|NP_415247.1| predicted fimbrial-like adhesin protein [Escherichia coli str. K-12 substr. MG1655]	-0.62441	-0.9534	-0.952295	-0.920056	-0.975756	-0.983197	-0.997722	-0.991912	0.587817	0.266843	0.111097	-0.051889	-0.308325	-0.207948	-0.467727	0	0.042792	0.071317	0.122618	0.049697	0.014079	0.00318	0.010911	0.255749	0.342267	0.462512	0.249039	0.240145	0.245286	0.311767
>gi|16128695|ref|NP_415248.1| citrate synthase [Escherichia coli str. K-12 substr. MG1655]	-0.924579	-0.973111	-0.981283	-0.960862	-0.986359	-0.988247	-0.997022	-0.994086	-0.610018	-0.691844	-0.736284	-0.872473	-0.904694	-0.856135	-0.951323	0	0.029485	0.020254	0.038944	0.020417	0.009499	0.003845	0.006681	0.279591	0.187253	0.25231	0.096975	0.091968	0.074829	0.038915
>gi|16128696|ref|NP_415249.1| succinate dehydrogenase, membrane subunit, binds cytochrome b556 [Escherichia coli str. K-12 substr. MG1655]	-0.995667	-0.999016	-0.999588	-0.991423	-0.998952	-0.995849	-0.999795	-0.9988	-0.289394	-0.689442	-0.765857	-0.913257	-0.966357	-0.94532	-0.960533	0	0.003077	0.000589	0.02583	0.003107	0.010035	0.000306	0.00172	0.559344	0.255029	0.236827	0.087476	0.035831	0.062312	0.047064
>gi|16128697|ref|NP_415250.1| succinate dehydrogenase, membrane subunit, binds cytochrome b556 [Escherichia coli str. K-12 substr. MG1655]	-0.999348	-0.981449	-0.994843	-0.968294	-0.99624	-0.954226	-0.998408	-0.987402	-0.065951	-0.361177	-0.734667	-0.875821	-0.938478	-0.908497	-0.947712	0	0.05801	0.007993	0.092876	0.010219	0.101227	0.003421	0.024277	0.700239	0.472253	0.172746	0.121743	0.046953	0.129016	0.06033
>gi|16128698|ref|NP_415251.1| succinate dehydrogenase, flavoprotein subunit [Escherichia coli str. K-12 substr. MG1655]	-0.827304	-0.996352	-0.991545	-0.984173	-0.994999	-0.99353	-0.998472	-0.996511	-0.459504	-0.608308	-0.744131	-0.733556	-0.848054	-0.848685	-0.893018	0	0.003021	0.00602	0.023123	0.009721	0.004706	0.001899	0.003483	0.195273	0.141388	0.160288	0.122948	0.068795	0.069773	0.059323
>gi|16128699|ref|NP_415252.1| succinate dehydrogenase, FeS subunit [Escherichia coli str. K-12 substr. MG1655]	0.915028	-0.998551	-0.996573	-0.982389	-0.996313	-0.989017	-0.999405	-0.995212	-0.643171	-0.813186	-0.724716	-0.867349	-0.852458	-0.698171	-0.903618	0	0.002354	0.005648	0.035381	0.011014	0.014211	0.000597	0.008083	0.252608	0.178911	0.228239	0.117038	0.128103	0.21111	0.079844
>gi|16128701|ref|NP_415254.1| 2-oxoglutarate decarboxylase, thiamin-requiring [Escherichia coli str. K-12 substr. MG1655]	-0.624077	-0.986453	-0.98007	-0.950471	-0.987015	-0.983851	-0.992836	-0.991868	-0.83401	-0.87186	-0.937186	-0.946683	-0.98169	-0.972756	-0.977374	0	0.008745	0.014545	0.069978	0.015158	0.010237	0.006438	0.007174	0.097657	0.056839	0.050048	0.026722	0.015547	0.018189	0.018107
>gi|16128702|ref|NP_415255.1| dihydrolipoyltranssuccinase [Escherichia coli str. K-12 substr. MG1655]	-0.957015	0.421701	0.186317	0.213369	-0.037438	-0.212943	-0.766678	-0.831435	-0.661922	-0.747807	-0.83653	-0.878871	-0.930781	-0.918827	-0.962756	0	0.527817	0.298048	0.355027	0.351424	0.270922	0.164356	0.109072	0.19429	0.198544	0.119869	0.08858	0.038578	0.052165	0.044483
>gi|16128703|ref|NP_415256.1| succinyl-CoA synthetase, beta subunit [Escherichia coli str. K-12 substr. MG1655]	-0.961394	-0.585119	-0.537743	-0.645141	-0.845134	-0.699212	-0.904791	-0.915038	-0.506532	-0.696433	-0.839654	-0.814765	-0.911592	-0.900759	-0.904162	0	0.307081	0.364773	0.260172	0.185821	0.206692	0.083712	0.046284	0.218988	0.214148	0.120689	0.098415	0.041306	0.054	0.060941
>gi|16128704|ref|NP_415257.1| succinyl-CoA synthetase, NAD(P)-binding, alpha subunit [Escherichia coli str. K-12 substr. MG1655]	-0.772545	-0.585119	-0.537743	-0.645141	-0.845134	-0.699212	-0.904791	-0.915038	-0.506532	-0.696433	-0.839654	-0.814765	-0.911592	-0.900759	-0.904162	0	0.307081	0.364773	0.260172	0.185821	0.206692	0.083712	0.046284	0.218988	0.214148	0.120689	0.098415	0.041306	0.054	0.060941
>gi|16128705|ref|NP_415258.1| DNA-binding transcriptional dual regulator, fatty-acyl-binding [Escherichia coli str. K-12 substr. MG1655]	-0.783941	-0.800441	-0.331599	-0.468175	-0.550687	-0.528443	-0.796574	-0.77608	-0.845972	-0.947873	-0.962519	-0.990759	-0.991046	-0.983791	-0.994014	0	0.24022	0.514513	0.366829	0.403413	0.299564	0.252142	0.176384	0.147172	0.060721	0.05011	0.008498	0.008796	0.024399	0.010324
>gi|16128706|ref|NP_415259.1| fused 2-O-a-mannosyl-D-glycerate specific PTS enzymes: IIA component/IIB component/IIC component [Escherichia coli str. K-12 substr. MG1655]	-0.120196	-0.980156	-0.9561	-0.95286	-0.991339	-0.975397	-0.996712	-0.993109	0.126393	-0.389404	-0.420212	-0.580153	-0.690814	-0.819624	-0.782002	0	0.015442	0.045406	0.051584	0.009378	0.032099	0.003022	0.007019	0.372917	0.270345	0.302424	0.224493	0.152587	0.102533	0.097868
>gi|16128707|ref|NP_415260.1| alpha-mannosidase [Escherichia coli str. K-12 substr. MG1655]	0.237658	-0.880629	-0.864243	-0.853104	-0.933134	-0.909641	-0.970855	-0.970852	-0.380024	-0.632454	-0.750178	-0.793948	-0.885609	-0.856925	-0.924692	0	0.078047	0.090026	0.083904	0.055872	0.051734	0.016616	0.015836	0.168743	0.159036	0.107639	0.054383	0.060386	0.052266	0.037948
>gi|90111166|ref|NP_415261.2| cytochrome d terminal oxidase, subunit I [Escherichia coli str. K-12 substr. MG1655]	-0.949139	-0.95497	-0.909263	-0.898751	-0.970853	-0.941126	-0.988138	-0.976002	0.053366	-0.385782	-0.653081	-0.69941	-0.824393	-0.767989	-0.838998	0	0.077355	0.103403	0.099355	0.033295	0.060378	0.010278	0.024758	0.505695	0.301922	0.247939	0.183532	0.094907	0.076208	0.118749
>gi|16128709|ref|NP_415262.1| cytochrome d terminal oxidase, subunit II [Escherichia coli str. K-12 substr. MG1655]	-0.969503	-0.994117	-0.98587	-0.980758	-0.995032	-0.960552	-0.996256	-0.987588	0.423575	-0.03441	-0.481437	-0.663504	-0.711831	-0.737656	-0.85782	0	0.014785	0.023879	0.035192	0.008758	0.067563	0.006833	0.012226	0.561959	0.574165	0.338169	0.209002	0.151202	0.190251	0.119928
>gi|94541102|ref|YP_588444.1| conserved protein [Escherichia coli str. K-12 substr. MG1655]	-0.999913	-0.999999	-0.999994	-0.99765	-0.999939	-0.999967	-0.999999	-0.999899	0.543099	0.683244	0.215061	0.550647	0.152644	0.163748	0.078002	0	3e-06	1.5e-05	0.007415	0.00019	6.6e-05	2e-06	0.000184	0.525317	0.212482	0.737251	0.262033	0.428426	0.570419	0.562445
>gi|16128710|ref|NP_415263.1| conserved protein [Escherichia coli str. K-12 substr. MG1655]	-0.999982	-0.999942	-0.999596	-0.997338	-0.999659	-0.998044	-0.999613	-0.999591	-0.405995	-0.818277	-0.766674	-0.923275	-0.968986	-0.949186	-0.96436	0	0.000142	0.000873	0.007768	0.001063	0.005054	0.000799	0.000812	0.444599	0.173391	0.307608	0.098337	0.035727	0.038662	0.029446
>gi|16128711|ref|NP_415264.1| acyl-CoA thioesterase, involved in phospholipid metabolism [Escherichia coli str. K-12 substr. MG1655]	0.102693	-0.324121	0.107258	-0.335747	-0.31321	-0.051907	-0.26437	-0.134997	-0.778354	-0.830166	-0.903031	-0.975404	-0.980473	-0.973317	-0.98682	0	0.600248	0.647656	0.505982	0.561332	0.554699	0.465419	0.350828	0.217167	0.127187	0.097027	0.025886	0.030825	0.031168	0.023849
>gi|16128712|ref|NP_415265.1| membrane spanning protein in TolA-TolQ-TolR complex [Escherichia coli str. K-12 substr. MG1655]	-0.733364	-0.972766	-0.953375	-0.932534	-0.980222	-0.984028	-0.995036	-0.991809	-0.615345	-0.828182	-0.866116	-0.935627	-0.979793	-0.972382	-0.97093	0	0.044265	0.05939	0.065913	0.018848	0.009307	0.006769	0.011247	0.26478	0.122337	0.124637	0.09552	0.015826	0.018832	0.02284
>gi|16128713|ref|NP_415266.1| membrane spanning protein in TolA-TolQ-TolR complex [Escherichia coli str. K-12 substr. MG1655]	-0.820687	-0.413887	-0.277559	-0.488913	-0.725379	-0.589645	-0.899442	-0.819578	-0.620195	-0.69822	-0.894016	-0.885046	-0.957155	-0.950877	-0.97632	0	0.631578	0.578071	0.285577	0.364337	0.296153	0.129965	0.158701	0.224124	0.285765	0.097219	0.102301	0.049316	0.030018	0.023124
>gi|16128714|ref|NP_415267.1| membrane anchored protein in TolA-TolQ-TolR complex [Escherichia coli str. K-12 substr. MG1655]	-0.096859	-0.504046	-0.740149	-0.783649	-0.881223	-0.897978	-0.998884	-0.984367	-0.97085	-0.991855	-0.979807	-0.982897	-0.977972	-0.989277	-0.980206	0	0.770005	0.41732	0.408061	0.256651	0.151533	0.002897	0.020009	0.029452	0.007344	0.0391	0.022333	0.043174	0.022128	0.044676
>gi|16128715|ref|NP_415268.1| periplasmic protein [Escherichia coli str. K-12 substr. MG1655]	-0.1732	-0.926107	-0.941895	-0.92341	-0.962155	-0.939335	-0.985314	-0.98852	-0.044177	-0.478606	-0.758576	-0.769345	-0.923318	-0.933097	-0.87952	0	0.084036	0.042236	0.091773	0.040424	0.036191	0.012288	0.011268	0.279121	0.279136	0.261305	0.148452	0.079126	0.101844	0.144057
>gi|16128716|ref|NP_415269.1| peptidoglycan-associated outer membrane lipoprotein [Escherichia coli str. K-12 substr. MG1655]	0.93127	-0.608735	-0.621853	-0.608804	-0.888287	-0.839786	-0.958634	-0.953526	-0.372183	-0.50162	-0.769459	-0.668498	-0.952028	-0.928667	-0.944509	0	0.397174	0.46217	0.251857	0.119797	0.13488	0.052901	0.055518	0.402252	0.456228	0.311715	0.315072	0.044704	0.071199	0.05784
>gi|16128717|ref|NP_415270.1| periplasmic TolA-binding protein [Escherichia coli str. K-12 substr. MG1655]	-0.692941	-0.803455	-0.716034	-0.804854	-0.951816	-0.869118	-0.969638	-0.984281	-0.540862	-0.584159	-0.828967	-0.873223	-0.96179	-0.990238	-0.980549	0	0.406201	0.397244	0.214693	0.090955	0.117257	0.067135	0.014345	0.465194	0.435435	0.368028	0.188746	0.071594	0.009607	0.027854
>gi|16128718|ref|NP_415271.1| quinolinate synthase, subunit A [Escherichia coli str. K-12 substr. MG1655]	-0.97331	-0.997913	-0.989545	-0.975263	-0.988187	-0.990356	-0.998587	-0.99434	-0.795442	-0.814832	-0.885527	-0.945145	-0.958392	-0.948458	-0.977672	0	0.002113	0.009775	0.039468	0.034212	0.008522	0.002179	0.006891	0.190052	0.099492	0.113613	0.053891	0.027	0.035452	0.023919
>gi|16128719|ref|NP_415272.1| nicotinamide mononucleotide transporter [Escherichia coli str. K-12 substr. MG1655]	-0.987734	-0.999255	-0.998264	-0.994857	-0.998011	-0.993716	-0.999739	-0.998171	-0.072398	-0.385813	-0.637347	-0.835411	-0.912039	-0.8684	-0.915347	0	0.00139	0.00233	0.011402	0.005912	0.011321	0.00049	0.002312	0.654642	0.518148	0.331807	0.106991	0.0534	0.160865	0.084586
>gi|16128720|ref|NP_415273.1| zinc efflux system [Escherichia coli str. K-12 substr. MG1655]	-0.998616	-0.999999	-0.999997	-0.997552	-0.999933	-0.999985	-0.999997	-0.999964	-0.778545	-0.843265	-0.870495	-0.915323	-0.949136	-0.981896	-0.975828	0	2e-06	3e-06	0.007722	0.000211	2.1e-05	8e-06	5.4e-05	0.4192	0.121076	0.144818	0.083309	0.101	0.028393	0.034466
>gi|16128721|ref|NP_415274.1| conserved protein [Escherichia coli str. K-12 substr. MG1655]	0.734352	-0.011291	-0.172717	-0.425905	-0.727065	-0.583689	-0.929473	-0.877706	0.729561	0.799395	0.664201	0.746774	0.371956	0.720355	0.403036	0	0.713183	0.733432	0.416407	0.288052	0.367832	0.111452	0.111642	0.285272	0.165456	0.530971	0.20594	0.228407	0.135097	0.552077
>gi|16128722|ref|NP_415275.1| 3-deoxy-D-arabino-heptulosonate-7-phosphate synthase, phenylalanine repressible [Escherichia coli str. K-12 substr. MG1655]	-0.992831	-0.991164	-0.995528	-0.990323	-0.99458	-0.995783	-0.999077	-0.998332	-0.831182	-0.876076	-0.912989	-0.948784	-0.978229	-0.971098	-0.978138	0	0.010052	0.004686	0.017166	0.013927	0.002908	0.001069	0.001892	0.109314	0.078666	0.055949	0.0295	0.014003	0.013622	0.017026
>gi|16128723|ref|NP_415276.1| phosphoglyceromutase 1 [Escherichia coli str. K-12 substr. MG1655]	-0.779514	-0.650838	-0.693618	-0.765792	-0.881835	-0.879999	-0.914438	-0.94502	-0.563641	-0.731632	-0.854455	-0.835512	-0.93649	-0.955067	-0.935196	0	0.474089	0.424141	0.319994	0.16928	0.08905	0.181579	0.042183	0.23239	0.276459	0.12533	0.117772	0.05553	0.0352	0.063997
>gi|16128724|ref|NP_415277.1| galactose-1-epimerase (mutarotase) [Escherichia coli str. K-12 substr. MG1655]	-0.301756	-0.650838	-0.693618	-0.765792	-0.881835	-0.879999	-0.914438	-0.94502	-0.563641	-0.731632	-0.854455	-0.835512	-0.93649	-0.955067	-0.935196	0	0.474089	0.424141	0.319994	0.16928	0.08905	0.181579	0.042183	0.23239	0.276459	0.12533	0.117772	0.05553	0.0352	0.063997
>gi|16128725|ref|NP_415278.1| galactokinase [Escherichia coli str. K-12 substr. MG1655]	-0.838006	-0.970441	-0.914635	-0.921019	-0.968534	-0.935059	-0.983531	-0.977632	-0.623004	-0.687455	-0.850325	-0.8431	-0.917681	-0.884904	-0.940998	0	0.020207	0.109883	0.073371	0.048591	0.037964	0.022114	0.018729	0.194923	0.202755	0.101587	0.102191	0.043519	0.034276	0.046157
>gi|16128726|ref|NP_415279.1| galactose-1-phosphate uridylyltransferase [Escherichia coli str. K-12 substr. MG1655]	-0.621542	-0.997361	-0.997324	-0.98961	-0.997544	-0.99694	-0.999099	-0.997247	-0.694037	-0.839127	-0.903763	-0.929264	-0.974785	-0.975955	-0.96872	0	0.005936	0.003357	0.025059	0.005404	0.002279	0.001612	0.002966	0.199825	0.123681	0.095668	0.071578	0.023768	0.020803	0.023436
>gi|49176045|ref|NP_415280.3| UDP-galactose-4-epimerase [Escherichia coli str. K-12 substr. MG1655]	-0.297468	-0.992025	-0.993972	-0.978493	-0.991703	-0.991865	-0.99848	-0.996448	-0.521768	-0.754609	-0.861547	-0.860727	-0.949212	-0.95826	-0.950649	0	0.008381	0.008461	0.036017	0.015965	0.005927	0.001505	0.003374	0.264409	0.132634	0.070565	0.072023	0.025882	0.037899	0.044648
>gi|16128728|ref|NP_415281.1| fused molybdate transporter subunits of ABC superfamily: ATP-binding components [Escherichia coli str. K-12 substr. MG1655]	-0.989429	-0.993681	-0.986831	-0.964394	-0.993343	-0.988317	-0.997592	-0.995293	-0.389655	-0.634807	-0.639964	-0.842317	-0.93761	-0.933567	-0.858344	0	0.006383	0.019408	0.074246	0.013065	0.010215	0.002279	0.00603	0.50164	0.242462	0.427696	0.099324	0.056911	0.052432	0.128294
>gi|16128729|ref|NP_415282.1| DNA-binding transcriptional repressor for the molybdenum transport operon modABC [Escherichia coli str. K-12 substr. MG1655]	-0.968882	-0.968042	-0.97347	-0.934205	-0.981762	-0.974738	-0.993812	-0.992505	-0.609878	-0.77917	-0.790442	-0.927908	-0.955017	-0.965065	-0.923371	0	0.040372	0.038487	0.101051	0.038257	0.019639	0.009939	0.008967	0.35473	0.189332	0.334443	0.042658	0.058314	0.033938	0.086405
>gi|16128730|ref|NP_415283.1| predicted protein [Escherichia coli str. K-12 substr. MG1655]	-0.999979	-0.992621	-0.986799	-0.920663	-0.979533	-0.982728	-0.999342	-0.986341	-0.25238	-0.321118	-0.678826	-0.801219	-0.6777	-0.753715	-0.722733	0	0.023226	0.036957	0.201124	0.054957	0.024668	0.001256	0.027173	0.465433	0.560261	0.218484	0.14853	0.319906	0.430413	0.296823
>gi|16128731|ref|NP_415284.1| molybdate transporter subunit [Escherichia coli str. K-12 substr. MG1655]	-0.204284	-0.325125	-0.332983	-0.584206	-0.750299	-0.705265	-0.934916	-0.963506	-0.638612	-0.660054	-0.798697	-0.907412	-0.964106	-0.930602	-0.898022	0	0.586968	0.521163	0.318784	0.214804	0.212714	0.056888	0.02829	0.172573	0.413457	0.231006	0.135189	0.053895	0.120552	0.124043
>gi|16128732|ref|NP_415285.1| molybdate transporter subunit [Escherichia coli str. K-12 substr. MG1655]	-0.983716	-0.999969	-0.997926	-0.995458	-0.999188	-0.984453	-0.999783	-0.99892	-0.068241	-0.62617	-0.535314	-0.851078	-0.876863	-0.907354	-0.931741	0	5e-05	0.004076	0.012103	0.002507	0.040393	0.000546	0.001668	0.496636	0.32963	0.568284	0.116926	0.196194	0.125717	0.067728
>gi|16128733|ref|NP_415286.1| molybdate transporter subunit [Escherichia coli str. K-12 substr. MG1655]	-0.94562	-0.999407	-0.998256	-0.980929	-0.99717	-0.994027	-0.999654	-0.998187	-0.719412	-0.854752	-0.839322	-0.911923	-0.977018	-0.969122	-0.958851	0	0.001108	0.002231	0.055558	0.00827	0.00801	0.000371	0.001857	0.115503	0.097441	0.147765	0.166121	0.032259	0.051586	0.054964
>gi|16128734|ref|NP_415287.1| pyridoxal phosphate (PLP) phosphatase [Escherichia coli str. K-12 substr. MG1655]	-0.992867	-0.999407	-0.998256	-0.980929	-0.99717	-0.994027	-0.999654	-0.998187	-0.719412	-0.854752	-0.839322	-0.911923	-0.977018	-0.969122	-0.958851	0	0.001108	0.002231	0.055558	0.00827	0.00801	0.000371	0.001857	0.115503	0.097441	0.147765	0.166121	0.032259	0.051586	0.054964
>gi|16128735|ref|NP_415288.1| 6-phosphogluconolactonase [Escherichia coli str. K-12 substr. MG1655]	0.646888	-0.999894	-0.999331	-0.988666	-0.997421	-0.998685	-0.999886	-0.997887	-0.099699	-0.571359	-0.800544	-0.811451	-0.914319	-0.92721	-0.936729	0	0.000153	0.001117	0.033784	0.0077	0.001396	0.000231	0.002959	0.492168	0.290945	0.190703	0.147983	0.057064	0.049857	0.049345
>gi|145698233|ref|NP_415289.4| predicted DNA-binding transcriptional regulator [Escherichia coli str. K-12 substr. MG1655]	-0.733499	-0.995897	-0.993036	-0.987956	-0.993307	-0.98696	-0.99879	-0.996937	-0.782089	-0.92873	-0.955339	-0.983169	-0.98973	-0.984604	-0.991523	0	0.006152	0.007116	0.017342	0.01027	0.013741	0.001183	0.003046	0.171636	0.056853	0.037608	0.013848	0.010233	0.016516	0.008378
>gi|16128737|ref|NP_415290.1| conserved protein [Escherichia coli str. K-12 substr. MG1655]	-0.842656	-0.866636	-0.929328	-0.903015	-0.957144	-0.923443	-0.992675	-0.982176	-0.018341	-0.351235	-0.649301	-0.641839	-0.746384	-0.798205	-0.88935	0	0.170309	0.058909	0.076448	0.068511	0.04491	0.008315	0.021141	0.310414	0.263816	0.265469	0.166594	0.166893	0.093883	0.079719
>gi|16128738|ref|NP_415291.1| predicted transporter [Escherichia coli str. K-12 substr. MG1655]	-0.984559	-0.999962	-0.999286	-0.992721	-0.999389	-0.987806	-0.999782	-0.998884	0.164123	-0.264803	-0.541132	-0.685836	-0.730917	-0.803434	-0.91187	0	5.4e-05	0.001667	0.021635	0.001755	0.034183	0.000331	0.001641	0.623738	0.452416	0.316033	0.268042	0.173645	0.207072	0.070156
>gi|90111167|ref|NP_415292.2| predicted hydratase [Escherichia coli str. K-12 substr. MG1655]	-0.129259	-0.89632	-0.961092	-0.960167	-0.963602	-0.979024	-0.994971	-0.990262	0.297702	-0.038623	-0.170548	-0.209844	-0.506345	-0.510942	-0.614781	0	0.098507	0.042675	0.027197	0.040894	0.01046	0.003952	0.008215	0.161277	0.136414	0.240448	0.212141	0.174933	0.199563	0.109859
>gi|16128740|ref|NP_415293.1| acyl-CoA thioesterase, lipoprotein [Escherichia coli str. K-12 substr. MG1655]	0.847519	-0.416803	-0.431758	-0.563448	-0.654683	-0.540349	-0.880047	-0.90671	0.424765	-0.035091	-0.346663	-0.342535	-0.690361	-0.813006	-0.666952	0	0.47745	0.218142	0.25294	0.344772	0.274572	0.117214	0.062699	0.281396	0.302736	0.253078	0.35768	0.215172	0.096164	0.275537
>gi|16128741|ref|NP_415294.1| kinase inhibitor homolog, UPF0098 family [Escherichia coli str. K-12 substr. MG1655]	-0.83671	-0.999657	-0.999709	-0.990185	-0.999296	-0.99932	-0.99993	-0.999491	0.142018	-0.28501	-0.621454	-0.755003	-0.785332	-0.860024	-0.832407	0	0.000436	0.000397	0.026598	0.001984	0.000971	0.000127	0.000741	0.480904	0.539196	0.308165	0.250774	0.12286	0.094957	0.154019
>gi|16128742|ref|NP_415295.1| 7,8-diaminopelargonic acid synthase, PLP-dependent [Escherichia coli str. K-12 substr. MG1655]	-0.904261	-0.999424	-0.996751	-0.990207	-0.995791	-0.996496	-0.999704	-0.997542	-0.473651	-0.670766	-0.802022	-0.860012	-0.907256	-0.908583	-0.931353	0	0.00129	0.002899	0.018601	0.012426	0.004913	0.000489	0.003172	0.329917	0.165595	0.136426	0.094684	0.061012	0.063315	0.054929
>gi|16128743|ref|NP_415296.1| biotin synthase [Escherichia coli str. K-12 substr. MG1655]	0.820917	-0.537501	-0.241493	-0.189335	-0.671318	-0.488341	-0.850579	-0.792019	-0.443405	-0.581046	-0.736725	-0.802646	-0.792772	-0.675279	-0.828593	0	0.520205	0.592483	0.461623	0.29439	0.315339	0.173156	0.147756	0.368719	0.175236	0.20688	0.13563	0.099361	0.193062	0.138076
>gi|16128744|ref|NP_415297.1| 8-amino-7-oxononanoate synthase [Escherichia coli str. K-12 substr. MG1655]	-0.794442	-0.999894	-0.999075	-0.990421	-0.999185	-0.998804	-0.999796	-0.998904	-0.825211	-0.843959	-0.931734	-0.954753	-0.980227	-0.972959	-0.944284	0	0.000141	0.001005	0.025732	0.002142	0.000749	0.000226	0.001247	0.055362	0.126829	0.062311	0.037933	0.026124	0.032183	0.080884
>gi|16128745|ref|NP_415298.1| malonyl-CoA methyltransferase, SAM-dependent [Escherichia coli str. K-12 substr. MG1655]	-0.989777	-0.999987	-0.999692	-0.99171	-0.999368	-0.999745	-0.999938	-0.999443	-0.809723	-0.906056	-0.972856	-0.989575	-0.990067	-0.994111	-0.981793	0	1.9e-05	0.000553	0.025312	0.001745	0.000304	0.000102	0.000675	0.408295	0.124957	0.052424	0.013628	0.019837	0.009294	0.030749
>gi|16128746|ref|NP_415299.1| dethiobiotin synthetase [Escherichia coli str. K-12 substr. MG1655]	0.770116	-0.951974	-0.892547	-0.931342	-0.971705	-0.956013	-0.992121	-0.979053	0.467974	-0.021608	-0.133446	-0.35726	-0.556866	-0.734743	-0.624593	0	0.036748	0.108225	0.086251	0.039187	0.04628	0.005501	0.01712	0.16923	0.123889	0.274652	0.231454	0.192942	0.176941	0.230405
>gi|16128747|ref|NP_415300.1| excinulease of nucleotide excision repair, DNA damage recognition component [Escherichia coli str. K-12 substr. MG1655]	-0.939314	-0.319402	0.158143	0.14371	-0.368632	-0.207541	-0.613299	-0.653558	-0.762734	-0.847699	-0.920556	-0.940902	-0.93664	-0.930395	-0.973675	0	0.634958	0.46771	0.377029	0.423798	0.411133	0.260149	0.22665	0.160621	0.097	0.061877	0.049414	0.041191	0.048674	0.025243
>gi|16128748|ref|NP_415301.1| predicted transferase with NAD(P)-binding Rossmann-fold domain [Escherichia coli str. K-12 substr. MG1655]	-0.997398	-0.319402	0.158143	0.14371	-0.368632	-0.207541	-0.613299	-0.653558	-0.762734	-0.847699	-0.920556	-0.940902	-0.93664	-0.930395	-0.973675	0	0.634958	0.46771	0.377029	0.423798	0.411133	0.260149	0.22665	0.160621	0.097	0.061877	0.049414	0.041191	0.048674	0.025243
>gi|16128749|ref|NP_415302.1| molybdopterin biosynthesis protein A [Escherichia coli str. K-12 substr. MG1655]	-0.944955	-0.996126	-0.993022	-0.980425	-0.976602	-0.987055	-0.992204	-0.996576	-0.856007	-0.899166	-0.959848	-0.954727	-0.986196	-0.984225	-0.980178	0	0.003658	0.008681	0.022978	0.063869	0.011777	0.011622	0.003351	0.111564	0.067675	0.038267	0.077838	0.021178	0.013563	0.023917
>gi|16128750|ref|NP_415303.1| molybdopterin biosynthesis protein B [Escherichia coli str. K-12 substr. MG1655]	-0.372812	-0.936922	-0.966752	-0.957852	-0.974065	-0.975763	-0.990259	-0.993532	-0.55277	-0.690394	-0.829564	-0.867308	-0.942017	-0.923276	-0.955173	0	0.058524	0.026668	0.03421	0.023659	0.019783	0.014848	0.006066	0.264372	0.15026	0.128715	0.074487	0.02984	0.051364	0.047377
>gi|16128751|ref|NP_415304.1| molybdopterin biosynthesis, protein C [Escherichia coli str. K-12 substr. MG1655]	-0.985846	-0.99301	-0.985436	-0.960148	-0.985531	-0.988702	-0.997779	-0.992634	-0.879795	-0.887498	-0.921909	-0.972611	-0.984522	-0.974572	-0.984698	0	0.006517	0.014868	0.076197	0.037126	0.01026	0.003925	0.00684	0.158755	0.085888	0.073098	0.039535	0.014952	0.019101	0.027348
>gi|16128752|ref|NP_415305.1| molybdopterin synthase, small subunit [Escherichia coli str. K-12 substr. MG1655]	-0.495697	-0.23363	-0.307682	-0.272778	-0.65546	-0.561875	-0.825253	-0.769154	-0.422294	-0.648903	-0.805692	-0.859058	-0.905748	-0.900258	-0.93086	0	0.795415	0.600869	0.523497	0.519945	0.399945	0.186239	0.247202	0.331146	0.326018	0.165392	0.184086	0.125217	0.087105	0.080593
>gi|16128753|ref|NP_415306.1| molybdopterin synthase, large subunit [Escherichia coli str. K-12 substr. MG1655]	-0.05854	-0.981118	-0.956945	-0.911971	-0.980906	-0.983606	-0.983973	-0.981868	0.147049	-0.34717	-0.472806	-0.683742	-0.791968	-0.866528	-0.872935	0	0.030932	0.062506	0.24517	0.03997	0.020004	0.025121	0.023311	0.33955	0.251084	0.398039	0.131478	0.137013	0.076428	0.058885
>gi|16128754|ref|NP_415307.1| inner membrane protein, UPF0005 family [Escherichia coli str. K-12 substr. MG1655]	-0.897637	-0.987243	-0.874288	-0.915199	-0.970105	-0.88247	-0.986163	-0.96579	0.2013	-0.371279	-0.637747	-0.588073	-0.827021	-0.770087	-0.895392	0	0.017098	0.195678	0.113579	0.043522	0.197904	0.0251	0.041906	0.527565	0.444431	0.275679	0.528331	0.185602	0.258807	0.102204
>gi|16128755|ref|NP_415308.1| inner membrane protein, UPF0005 family [Escherichia coli str. K-12 substr. MG1655]	-0.966385	-0.999963	-0.994781	-0.99912	-0.999756	-0.999592	-0.999978	-0.999777	-0.295362	-0.566306	-0.699878	-0.813984	-0.921848	-0.862985	-0.911802	0	6.5e-05	0.016429	0.002624	0.000763	0.00106	4.5e-05	0.000408	0.557317	0.257076	0.168754	0.177943	0.068162	0.191953	0.092014
>gi|16128756|ref|NP_415309.1| conserved inner membrane protein [Escherichia coli str. K-12 substr. MG1655]	-0.99941	-0.999996	-0.999943	-0.994825	-0.999673	-0.997117	-0.999849	-0.999699	-0.556616	-0.768407	-0.867493	-0.884396	-0.975192	-0.91679	-0.956222	0	6e-06	5.3e-05	0.016184	0.001011	0.007886	0.000299	0.000451	0.405061	0.157852	0.118474	0.170775	0.043231	0.122641	0.065554
>gi|16128757|ref|NP_415310.1| cardiolipin synthase 2 [Escherichia coli str. K-12 substr. MG1655]	-0.885091	-0.997794	-0.988771	-0.973144	-0.994932	-0.988083	-0.996266	-0.993332	-0.906747	-0.960416	-0.984755	-0.99465	-0.996058	-0.995508	-0.994126	0	0.003281	0.016939	0.056714	0.012362	0.013657	0.00565	0.00691	0.105106	0.030281	0.018314	0.004134	0.004154	0.005627	0.008523
>gi|16128758|ref|NP_415311.1| conserved protein, endo/exonuclease/phosphatase family PFAM PF03372 [Escherichia coli str. K-12 substr. MG1655]	-0.930177	-0.999852	-0.999449	-0.994105	-0.999272	-0.99933	-0.999811	-0.999284	-0.932715	-0.94495	-0.96888	-0.985691	-0.994343	-0.994809	-0.995596	0	0.000219	0.000856	0.016222	0.00218	0.000718	0.000304	0.001006	0.077425	0.045447	0.046785	0.023311	0.00839	0.007472	0.004981
>gi|16128759|ref|NP_415312.1| inner membrane protein [Escherichia coli str. K-12 substr. MG1655]	-0.998977	-0.999954	-0.999723	-0.955293	-0.999646	-0.998884	-0.999947	-0.999371	-0.627869	-0.690088	-0.698851	-0.878809	-0.990512	-0.961991	-0.963824	0	0.000112	0.000551	0.1413	0.001079	0.001841	9.2e-05	0.0011	0.328653	0.391149	0.456352	0.136532	0.015586	0.069433	0.061412
>gi|16128760|ref|NP_415313.1| predicted transporter subunit: membrane component of ABC superfamily [Escherichia coli str. K-12 substr. MG1655]	-0.731824	-0.995297	-0.946914	-0.945864	-0.986679	-0.953472	-0.994703	-0.991333	-0.300773	-0.614757	-0.783893	-0.935435	-0.933484	-0.934988	-0.952462	0	0.005482	0.093132	0.10432	0.023179	0.051478	0.004547	0.008659	0.370697	0.464641	0.217372	0.077468	0.144191	0.111393	0.061278
>gi|16128761|ref|NP_415314.1| predicted transporter subunit: membrane component of ABC superfamily [Escherichia coli str. K-12 substr. MG1655]	-0.310077	-0.99527	-0.965771	-0.969976	-0.987882	-0.957255	-0.997585	-0.991751	-0.070902	-0.558216	-0.630262	-0.860977	-0.913391	-0.905852	-0.933514	0	0.010456	0.049704	0.041604	0.021276	0.068095	0.002974	0.009882	0.47005	0.396939	0.5268	0.103841	0.115613	0.120753	0.053828
>gi|90111168|ref|NP_415315.4| fused predicted transporter subunits of ABC superfamily: ATP-binding components [Escherichia coli str. K-12 substr. MG1655]	-0.913236	-0.939478	-0.921287	-0.881429	-0.958339	-0.959594	-0.989608	-0.985759	0.302075	0.188165	0.054364	-0.100793	-0.048982	-0.157546	-0.199407	0	0.082796	0.067033	0.139046	0.08537	0.035363	0.011346	0.015352	0.171798	0.283295	0.308484	0.311858	0.278261	0.350449	0.466642
>gi|16128763|ref|NP_415316.1| predicted membrane fusion protein (MFP) component of efflux pump, membrane anchor [Escherichia coli str. K-12 substr. MG1655]	-0.152708	-0.939478	-0.921287	-0.881429	-0.958339	-0.959594	-0.989608	-0.985759	0.302075	0.188165	0.054364	-0.100793	-0.048982	-0.157546	-0.199407	0	0.082796	0.067033	0.139046	0.08537	0.035363	0.011346	0.015352	0.171798	0.283295	0.308484	0.311858	0.278261	0.350449	0.466642
>gi|162135896|ref|NP_415317.4| predicted DNA-binding transcriptional regulator [Escherichia coli str. K-12 substr. MG1655]	-0.999569	-0.994806	-0.996328	-0.989411	-0.993613	-0.997022	-0.999422	-0.998105	-0.87169	-0.846934	-0.873777	-0.972098	-0.988865	-0.989085	-0.988976	0	0.006872	0.005311	0.014384	0.01116	0.002491	0.000968	0.002175	0.117944	0.169253	0.304368	0.048417	0.009408	0.012228	0.014151
>gi|16128765|ref|NP_415318.1| ATP-dependent RNA helicase [Escherichia coli str. K-12 substr. MG1655]	-0.939979	-0.996733	-0.993956	-0.974903	-0.992616	-0.990063	-0.99913	-0.99648	-0.833613	-0.960546	-0.979834	-0.989472	-0.99508	-0.992131	-0.996484	0	0.006484	0.010986	0.059586	0.019812	0.010341	0.001247	0.00416	0.182549	0.046073	0.024274	0.014887	0.005063	0.014071	0.005782
>gi|16128766|ref|NP_415319.1| conserved protein, DUF1768 family [Escherichia coli str. K-12 substr. MG1655]	-0.738725	-0.98697	-0.968794	-0.94392	-0.987971	-0.986886	-0.996168	-0.990174	-0.898001	-0.97465	-0.993377	-0.996088	-0.996471	-0.996145	-0.996728	0	0.032677	0.03488	0.142774	0.032471	0.012506	0.006263	0.012053	0.118811	0.026417	0.009409	0.004261	0.004346	0.004723	0.006056
>gi|16128767|ref|NP_415320.1| ATP-dependent DNA helicase [Escherichia coli str. K-12 substr. MG1655]	-0.969249	-0.999069	-0.992472	-0.972554	-0.993119	-0.987539	-0.998135	-0.995149	-0.933055	-0.965228	-0.97863	-0.991403	-0.992782	-0.991923	-0.996098	0	0.000931	0.008932	0.04765	0.018556	0.01115	0.002725	0.005068	0.055647	0.035579	0.018673	0.009659	0.007373	0.008975	0.004898
>gi|16128768|ref|NP_415321.1| predicted transferase/phosphorylase [Escherichia coli str. K-12 substr. MG1655]	-0.98913	-0.996923	-0.993502	-0.97857	-0.987162	-0.991193	-0.998714	-0.995149	-0.784244	-0.876463	-0.916382	-0.941554	-0.952601	-0.955867	-0.977673	0	0.00495	0.006076	0.036267	0.038538	0.012924	0.001965	0.005768	0.197854	0.063681	0.055313	0.043939	0.037748	0.042466	0.017687
>gi|16128769|ref|NP_415322.1| predicted dehydrogenase [Escherichia coli str. K-12 substr. MG1655]	-0.99359	-0.999988	-0.99996	-0.998527	-0.999718	-0.999928	-0.999988	-0.999892	-0.86506	-0.867782	-0.925774	-0.944241	-0.980106	-0.974795	-0.975315	0	1.3e-05	3.6e-05	0.004204	0.000864	8e-05	2.1e-05	0.000168	0.141772	0.084274	0.063997	0.053407	0.014446	0.022819	0.024797
>gi|16128770|ref|NP_415323.1| predicted protein [Escherichia coli str. K-12 substr. MG1655]	0.895028	-0.403324	-0.511754	-0.601579	-0.826779	-0.885152	-0.992959	-0.972077	0.313605	0.101848	0.20061	-0.177684	-0.346767	-0.454222	-0.367926	0	0.649717	0.547928	0.316555	0.238676	0.128643	0.006309	0.046	0.451729	0.517355	0.614756	0.532337	0.60882	0.57179	0.6796
>gi|16128771|ref|NP_415324.1| DksA-type zinc finger protein, function unknown [Escherichia coli str. K-12 substr. MG1655]	-0.564116	-0.99633	-0.995651	-0.992602	-0.997115	-0.992641	-0.999703	-0.993122	-0.798511	-0.797035	-0.956618	-0.951448	-0.973503	-0.929929	-0.981398	0	0.005387	0.008304	0.011348	0.007363	0.01247	0.000599	0.015212	0.198046	0.304415	0.047091	0.042773	0.018895	0.111179	0.019238
>gi|90111170|ref|NP_415325.4| conserved protein, Fe(II)-dependent oxygenase superfamily [Escherichia coli str. K-12 substr. MG1655]	-0.068444	-0.99633	-0.995651	-0.992602	-0.997115	-0.992641	-0.999703	-0.993122	-0.798511	-0.797035	-0.956618	-0.951448	-0.973503	-0.929929	-0.981398	0	0.005387	0.008304	0.011348	0.007363	0.01247	0.000599	0.015212	0.198046	0.304415	0.047091	0.042773	0.018895	0.111179	0.019238
>gi|16128773|ref|NP_415326.1| catecholate siderophore receptor Fiu [Escherichia coli str. K-12 substr. MG1655]	0.955584	-0.855555	-0.943282	-0.929404	-0.968315	-0.955256	-0.994295	-0.982084	0.724369	0.50248	0.334714	0.124825	-0.282635	-0.382795	-0.309232	0	0.19321	0.034456	0.06706	0.0445	0.032122	0.005463	0.018044	0.174514	0.100607	0.261961	0.305681	0.278538	0.23628	0.347046
>gi|90111171|ref|NP_415327.2| colanic acid mucoidy stimulation protein [Escherichia coli str. K-12 substr. MG1655]	0.868696	-0.888324	-0.854581	-0.926718	-0.971184	-0.969911	-0.996171	-0.989537	0.307098	-0.071701	-0.013774	-0.112303	-0.456281	-0.453611	-0.4634	0	0.191235	0.195133	0.045493	0.037964	0.03644	0.005754	0.012264	0.309189	0.489466	0.455877	0.416377	0.419969	0.46158	0.315154
>gi|162135897|ref|NP_415328.4| 23S rRNA mA1618 methyltransferase, SAM-dependent [Escherichia coli str. K-12 substr. MG1655]	-0.415039	-0.998432	-0.998451	-0.994067	-0.998336	-0.997211	-0.999481	-0.999243	-0.868693	-0.933965	-0.970319	-0.983977	-0.992146	-0.993158	-0.985824	0	0.001906	0.002063	0.008145	0.00242	0.002315	0.000701	0.00094	0.06031	0.053836	0.032382	0.016196	0.007865	0.005774	0.019281
>gi|90111173|ref|NP_415329.4| predicted mechanosensitive channel [Escherichia coli str. K-12 substr. MG1655]	0.392833	-0.99877	-0.990449	-0.988387	-0.997394	-0.986678	-0.999013	-0.998221	-0.360785	-0.696693	-0.699681	-0.915861	-0.90666	-0.921554	-0.930908	0	0.001263	0.015808	0.016909	0.004886	0.019429	0.001384	0.001913	0.325556	0.229653	0.410127	0.077879	0.175735	0.132235	0.063128
>gi|16128777|ref|NP_415330.1| glutamine transporter subunit [Escherichia coli str. K-12 substr. MG1655]	-0.997782	-0.978152	-0.936862	-0.84832	-0.955663	-0.965836	-0.990603	-0.98417	-0.928271	-0.946746	-0.967375	-0.989402	-0.988225	-0.981421	-0.995519	0	0.035051	0.093166	0.270677	0.120857	0.030638	0.018565	0.020721	0.076545	0.05419	0.039671	0.012469	0.011242	0.018622	0.005611
>gi|16128778|ref|NP_415331.1| glutamine transporter subunit [Escherichia coli str. K-12 substr. MG1655]	-0.997734	-0.999636	-0.996998	-0.997621	-0.997281	-0.992489	-0.999894	-0.998839	-0.250202	-0.595971	-0.522946	-0.896567	-0.865666	-0.873833	-0.945784	0	0.001021	0.005968	0.005648	0.008505	0.02026	0.000189	0.001613	0.573826	0.523359	0.671097	0.144791	0.315223	0.230187	0.057287
>gi|16128779|ref|NP_415332.1| glutamine transporter subunit [Escherichia coli str. K-12 substr. MG1655]	-0.779205	-0.207064	-0.271214	-0.391216	-0.669777	-0.466643	-0.88267	-0.900146	-0.712635	-0.763708	-0.921744	-0.957348	-0.983421	-0.965243	-0.97918	0	0.726577	0.517322	0.438702	0.373135	0.351845	0.195687	0.057851	0.177798	0.209756	0.079466	0.04005	0.018274	0.02649	0.01259
>gi|16128780|ref|NP_415333.1| Fe-binding and storage protein [Escherichia coli str. K-12 substr. MG1655]	-0.91264	0.316207	0.072243	-0.03114	0.106132	-0.458811	-0.507653	-0.887942	-0.796064	-0.888551	-0.954022	-0.975464	-0.988109	-0.986498	-0.985299	0	0.563737	0.579946	0.504579	0.587348	0.473182	0.436793	0.121163	0.23101	0.08338	0.042327	0.023904	0.011574	0.013545	0.020766
>gi|16128781|ref|NP_415334.1| threonine and homoserine efflux system [Escherichia coli str. K-12 substr. MG1655]	-0.989157	-0.999991	-0.999485	-0.993401	-0.999318	-0.99491	-0.999971	-0.999408	-0.241305	-0.657516	-0.607851	-0.830316	-0.854919	-0.915004	-0.922848	0	9e-06	0.001087	0.019603	0.002107	0.014204	4.8e-05	0.00087	0.464397	0.20959	0.31698	0.148688	0.192139	0.119309	0.080404
>gi|16128782|ref|NP_415335.1| outer membrane protein X [Escherichia coli str. K-12 substr. MG1655]	-0.744223	-0.925474	-0.978226	-0.951826	-0.990238	-0.969296	-0.996119	-0.963538	0.77718	0.692399	0.433854	0.397497	-0.288113	-0.070834	-0.095479	0	0.140119	0.032752	0.054712	0.019654	0.039016	0.00609	0.055717	0.133275	0.30892	0.346653	0.383334	0.491645	0.490904	0.521305
>gi|16128783|ref|NP_415336.1| predicted hydrolase, inner membrane [Escherichia coli str. K-12 substr. MG1655]	-0.714954	-0.910976	-0.929359	-0.908714	-0.980247	-0.933753	-0.992684	-0.985243	-0.600026	-0.774109	-0.914512	-0.927206	-0.98201	-0.956865	-0.964707	0	0.084044	0.07878	0.111752	0.028711	0.048386	0.007378	0.018374	0.258794	0.129303	0.085227	0.038853	0.019019	0.040638	0.036453
>gi|16128784|ref|NP_415337.1| predicted protein [Escherichia coli str. K-12 substr. MG1655]	-0.574278	-0.974518	-0.987945	-0.953817	-0.992546	-0.988624	-0.988456	-0.996242	-0.767835	-0.970978	-0.943925	-0.977298	-0.982667	-0.995377	-0.996177	0	0.05077	0.019807	0.052232	0.007725	0.013219	0.017013	0.00423	0.339124	0.050713	0.09694	0.061101	0.044913	0.005122	0.005058
>gi|16128785|ref|NP_415338.1| DNA-binding transcriptional regulator of mntH [Escherichia coli str. K-12 substr. MG1655]	-0.996172	-0.97295	-0.863193	-0.816275	-0.952037	-0.969966	-0.986563	-0.958457	-0.890702	-0.934197	-0.93513	-0.986791	-0.987376	-0.982972	-0.993015	0	0.052517	0.194707	0.388337	0.108649	0.043578	0.019704	0.052534	0.108468	0.075214	0.074935	0.017538	0.012648	0.016865	0.010521
>gi|16128786|ref|NP_415339.1| predicted transporter [Escherichia coli str. K-12 substr. MG1655]	-0.98967	-0.999989	-0.999339	-0.990861	-0.999443	-0.993162	-0.999926	-0.999329	-0.18209	-0.622929	-0.707016	-0.793085	-0.898839	-0.939797	-0.953087	0	1.7e-05	0.001386	0.027441	0.001725	0.018175	0.000108	0.000958	0.54919	0.239562	0.203419	0.284461	0.118855	0.088052	0.039472
>gi|16128787|ref|NP_415340.1| L,D-transpeptidase linking Lpp to murein [Escherichia coli str. K-12 substr. MG1655]	0.890222	0.090964	-0.298859	-0.426959	-0.37951	-0.389478	-0.741068	-0.677691	0.217678	-0.123081	-0.639593	-0.524095	-0.653014	-0.757422	-0.78849	0	0.518987	0.407685	0.298304	0.303754	0.236995	0.146929	0.312758	0.392943	0.20373	0.165365	0.267187	0.137167	0.114214	0.16428
>gi|16128788|ref|NP_415341.1| fused predicted transporter subunits of ABC superfamily: ATP-binding components [Escherichia coli str. K-12 substr. MG1655]	-0.560201	-0.599435	-0.575914	-0.554729	-0.790237	-0.78296	-0.931729	-0.931479	0.150151	-0.217006	-0.256154	-0.293301	-0.503539	-0.464712	-0.514306	0	0.354599	0.353822	0.328853	0.201977	0.108313	0.057269	0.066033	0.287793	0.186829	0.243446	0.229005	0.142157	0.216882	0.228587
>gi|16128789|ref|NP_415342.1| predicted protein [Escherichia coli str. K-12 substr. MG1655]	-0.725673	-0.994646	-0.988511	-0.973903	-0.992273	-0.98982	-0.996208	-0.995136	-0.602553	-0.796948	-0.899066	-0.912322	-0.968732	-0.971234	-0.956522	0	0.004179	0.01082	0.052227	0.01321	0.006433	0.004313	0.004594	0.103904	0.133084	0.080612	0.066532	0.015881	0.020256	0.032269
>gi|16128790|ref|NP_415343.1| sugar phosphatase; preference for fructose-1-P, ribose-5-P and glucose-6-P [Escherichia coli str. K-12 substr. MG1655]	-0.881571	-0.765295	-0.846658	-0.734973	-0.937498	-0.87761	-0.983474	-0.974877	-0.90835	-0.927927	-0.978089	-0.986454	-0.988113	-0.982485	-0.993044	0	0.34162	0.140479	0.227261	0.108162	0.09689	0.008475	0.034751	0.05793	0.06627	0.016169	0.00916	0.013849	0.021035	0.007538
>gi|16128791|ref|NP_415344.1| predicted pyruvate formate lyase [Escherichia coli str. K-12 substr. MG1655]	-0.943519	-0.988163	-0.988734	-0.973548	-0.989515	-0.989554	-0.997393	-0.995576	-0.806045	-0.826705	-0.925696	-0.938177	-0.971542	-0.9714	-0.973614	0	0.0097	0.011408	0.029337	0.016577	0.005915	0.002007	0.003817	0.088729	0.050471	0.046134	0.032461	0.018761	0.01399	0.020048
>gi|226524704|ref|NP_415345.2| predicted pyruvate formate lyase activating enzyme [Escherichia coli str. K-12 substr. MG1655]	-0.994142	-0.999798	-0.999664	-0.996431	-0.997383	-0.998561	-0.999641	-0.99877	-0.80571	-0.719686	-0.885857	-0.941074	-0.941929	-0.942865	-0.959756	0	0.000365	0.000338	0.008303	0.008158	0.002048	0.000539	0.001807	0.171512	0.346256	0.098222	0.053863	0.047923	0.037109	0.049941
>gi|90111174|ref|NP_415346.4| fructose-6-phosphate aldolase 1 [Escherichia coli str. K-12 substr. MG1655]	-0.770275	-0.767239	-0.798644	-0.718392	-0.873272	-0.818724	-0.953455	-0.944587	-0.696945	-0.77917	-0.909655	-0.937679	-0.94808	-0.956905	-0.966276	0	0.231009	0.181513	0.264534	0.184057	0.15392	0.085932	0.029697	0.150556	0.154754	0.0591	0.044036	0.091174	0.041885	0.026606
>gi|16128794|ref|NP_415347.1| molybdopterin synthase sulfurylase [Escherichia coli str. K-12 substr. MG1655]	-0.890955	-0.994317	-0.929322	-0.941052	-0.982436	-0.934285	-0.996319	-0.97894	-0.212861	-0.298994	-0.477343	-0.533368	-0.544679	-0.381443	-0.54351	0	0.008962	0.097745	0.068881	0.047416	0.07113	0.004663	0.026113	0.298374	0.358644	0.370062	0.276645	0.216829	0.195586	0.432311
>gi|16128795|ref|NP_415348.1| molybdopterin biosynthesis protein [Escherichia coli str. K-12 substr. MG1655]	-0.091144	-0.959068	-0.90298	-0.904155	-0.976186	-0.925927	-0.982072	-0.978108	0.298216	-0.078263	-0.505942	-0.455907	-0.582328	-0.591934	-0.638344	0	0.042144	0.084833	0.07448	0.033809	0.067835	0.018043	0.021298	0.407459	0.315676	0.324117	0.198564	0.22223	0.18219	0.201201
>gi|16128796|ref|NP_415349.1| Isoaspartyl peptidase [Escherichia coli str. K-12 substr. MG1655]	-0.965123	-0.969888	-0.9241	-0.925434	-0.981542	-0.974582	-0.998663	-0.980435	0.470651	0.42671	-0.099651	0.016475	-0.089999	-0.241903	-0.307527	0	0.057458	0.131099	0.104967	0.043281	0.026214	0.002533	0.029801	0.247881	0.208859	0.499044	0.320453	0.348596	0.310596	0.524012
>gi|145698235|ref|NP_415350.2| glutathione transporter ATP-binding protein, ABC superfamily [Escherichia coli str. K-12 substr. MG1655]	-0.906366	-0.992209	-0.97957	-0.929479	-0.983705	-0.979119	-0.996071	-0.987868	-0.897434	-0.936882	-0.966803	-0.990031	-0.99391	-0.988553	-0.996	0	0.020056	0.025497	0.121517	0.039309	0.023168	0.005869	0.012248	0.097195	0.053393	0.034176	0.008964	0.00573	0.016135	0.005741
>gi|16128798|ref|NP_415351.1| glutathione periplasmic binding protein, ABC superfamily transporter [Escherichia coli str. K-12 substr. MG1655]	-0.051625	-0.260129	-0.512367	-0.60211	-0.798263	-0.735077	-0.899912	-0.928343	-0.491511	-0.703738	-0.87496	-0.924555	-0.971816	-0.955301	-0.961353	0	0.457118	0.270411	0.344525	0.260458	0.178431	0.138628	0.026525	0.225938	0.251115	0.162819	0.07093	0.03079	0.057897	0.028409
>gi|16128799|ref|NP_415352.1| glutathione transporter, permease component, ABC superfamily [Escherichia coli str. K-12 substr. MG1655]	-0.994881	-0.997897	-0.991321	-0.969455	-0.994711	-0.970339	-0.997871	-0.992663	-0.218086	-0.546265	-0.807114	-0.902678	-0.937053	-0.960666	-0.955376	0	0.005688	0.012517	0.078512	0.012886	0.047005	0.002804	0.008074	0.430736	0.358295	0.15447	0.099168	0.070219	0.037575	0.055444
>gi|16128800|ref|NP_415353.1| glutathione transporter, permease component, ABC superfamily [Escherichia coli str. K-12 substr. MG1655]	-0.975605	-0.999451	-0.995004	-0.992744	-0.998381	-0.987485	-0.999243	-0.998685	-0.462607	-0.785858	-0.86799	-0.95898	-0.960691	-0.962551	-0.964401	0	0.001296	0.012049	0.011083	0.00405	0.02089	0.001291	0.001539	0.337095	0.136653	0.118182	0.058828	0.068248	0.055647	0.049574
>gi|16128801|ref|NP_415354.1| predicted cyclic-di-GMP phosphodiesterase, inner membrane protein [Escherichia coli str. K-12 substr. MG1655]	-0.777541	-0.955395	-0.976754	-0.964448	-0.984694	-0.967567	-0.998191	-0.989867	-0.734356	-0.88788	-0.940569	-0.947332	-0.967872	-0.962055	-0.984645	0	0.050379	0.034219	0.027625	0.034929	0.029105	0.001896	0.014362	0.129594	0.114652	0.034948	0.048896	0.035489	0.037107	0.014611
>gi|16128802|ref|NP_415355.1| predicted diguanylate cyclase [Escherichia coli str. K-12 substr. MG1655]	-0.648728	-0.984542	-0.988566	-0.973646	-0.994039	-0.951276	-0.998723	-0.985904	-0.562802	-0.742508	-0.895708	-0.91594	-0.960595	-0.937155	-0.967534	0	0.018446	0.016108	0.0294	0.010662	0.052049	0.001918	0.020963	0.286189	0.26537	0.083308	0.055361	0.046917	0.040564	0.027069
>gi|16128803|ref|NP_415356.1| ribosomal protein S12 methylthiotransferase; radical SAM superfamily [Escherichia coli str. K-12 substr. MG1655]	-0.898167	-0.999483	-0.995502	-0.984527	-0.989301	-0.992304	-0.998724	-0.995476	-0.638877	-0.601106	-0.829142	-0.864651	-0.907982	-0.88731	-0.965978	0	0.000954	0.007004	0.036282	0.033065	0.007937	0.00248	0.005608	0.194528	0.374726	0.174216	0.083482	0.050591	0.075044	0.027418
>gi|16128804|ref|NP_415357.1| repressor of biofilm formation by indole transport regulation [Escherichia coli str. K-12 substr. MG1655]	-0.9831	-0.999833	-0.999692	-0.991619	-0.998321	-0.999368	-0.999939	-0.999265	-0.969124	-0.973167	-0.989889	-0.994291	-0.992502	-0.991616	-0.995893	0	0.000234	0.00057	0.02393	0.005174	0.000927	7.9e-05	0.001686	0.031709	0.041711	0.01355	0.008638	0.010122	0.018499	0.007289
>gi|16128805|ref|NP_415358.1| soluble aldose sugar dehydrogenase [Escherichia coli str. K-12 substr. MG1655]	-0.077166	-0.991967	-0.986657	-0.962167	-0.991395	-0.984728	-0.993698	-0.995713	-0.129304	-0.558104	-0.722419	-0.762849	-0.872057	-0.903417	-0.88421	0	0.006093	0.012974	0.080557	0.010447	0.01265	0.005357	0.002957	0.303197	0.21403	0.136039	0.120405	0.092467	0.055113	0.091807
>gi|90111175|ref|NP_415359.4| glutathione S-transferase homolog [Escherichia coli str. K-12 substr. MG1655]	-0.097962	-0.891304	-0.782745	-0.823113	-0.915397	-0.86769	-0.944597	-0.968204	-0.011814	-0.430794	-0.472642	-0.591021	-0.846727	-0.886504	-0.833117	0	0.074304	0.204904	0.132064	0.152628	0.120361	0.049006	0.01279	0.12129	0.360402	0.423566	0.242803	0.094249	0.098277	0.1935
>gi|16128807|ref|NP_415360.1| D-alanyl-D-alanine carboxypeptidase (penicillin-binding protein 6a) [Escherichia coli str. K-12 substr. MG1655]	0.936359	-0.891304	-0.782745	-0.823113	-0.915397	-0.86769	-0.944597	-0.968204	-0.011814	-0.430794	-0.472642	-0.591021	-0.846727	-0.886504	-0.833117	0	0.074304	0.204904	0.132064	0.152628	0.120361	0.049006	0.01279	0.12129	0.360402	0.423566	0.242803	0.094249	0.098277	0.1935
>gi|16128808|ref|NP_415361.1| DNA-binding transcriptional repressor [Escherichia coli str. K-12 substr. MG1655]	-0.962667	-0.999077	-0.998461	-0.99082	-0.997986	-0.994408	-0.998787	-0.997088	-0.933687	-0.96157	-0.976315	-0.98941	-0.986806	-0.984401	-0.993617	0	0.00126	0.001756	0.012508	0.005467	0.005175	0.001549	0.004032	0.091341	0.033184	0.023675	0.012313	0.016381	0.016572	0.009426
>gi|16128809|ref|NP_415362.1| undecaprenyl pyrophosphate phosphatase [Escherichia coli str. K-12 substr. MG1655]	-0.998464	-0.999999	-0.999994	-0.996635	-0.999958	-0.999914	-0.999996	-0.999951	-0.504046	-0.56977	-0.600837	-0.824719	-0.949874	-0.953056	-0.952853	0	1e-06	1.2e-05	0.010616	0.000131	0.000211	8e-06	8e-05	0.350357	0.335197	0.474407	0.231572	0.060537	0.068469	0.077721
>gi|16128810|ref|NP_415363.1| multidrug efflux system protein [Escherichia coli str. K-12 substr. MG1655]	-0.990554	-0.99998	-0.997353	-0.993721	-0.999073	-0.996408	-0.999931	-0.998809	-0.157025	-0.649201	-0.735693	-0.843525	-0.897989	-0.916387	-0.935814	0	3.4e-05	0.005539	0.017068	0.002753	0.008988	8.1e-05	0.001805	0.542913	0.218519	0.177587	0.13213	0.09968	0.089647	0.049568
>gi|16128811|ref|NP_415364.1| predicted protein [Escherichia coli str. K-12 substr. MG1655]	0.283367	-0.996823	-0.998693	-0.946776	-0.990995	-0.988209	-0.99949	-0.996042	-0.760866	-0.829293	-0.939027	-0.911846	-0.980602	-0.981061	-0.988257	0	0.009035	0.000997	0.162838	0.021577	0.020091	0.000894	0.004037	0.357292	0.183879	0.070167	0.126696	0.021091	0.028515	0.016645
>gi|90111176|ref|NP_415365.4| FMN and erythrose-4-P phosphatase [Escherichia coli str. K-12 substr. MG1655]	-0.932626	-0.665879	-0.685415	-0.636718	-0.881916	-0.809114	-0.981955	-0.934915	-0.402815	-0.552868	-0.730729	-0.792179	-0.90987	-0.886068	-0.893534	0	0.425699	0.288716	0.349427	0.209664	0.13572	0.012459	0.085299	0.28354	0.257517	0.196952	0.136542	0.072568	0.054775	0.074247
>gi|16128813|ref|NP_415366.1| predicted transporter [Escherichia coli str. K-12 substr. MG1655]	-0.771824	-0.99992	-0.998755	-0.993182	-0.999268	-0.989646	-0.999885	-0.998542	0.242065	-0.356778	-0.524442	-0.745563	-0.771007	-0.890999	-0.874266	0	7.4e-05	0.002151	0.017434	0.001848	0.027728	0.000152	0.002306	0.549147	0.435958	0.451297	0.197695	0.173516	0.076045	0.116342
>gi|16128814|ref|NP_415367.1| predicted DNA-binding transcriptional regulator [Escherichia coli str. K-12 substr. MG1655]	-0.184105	-0.826254	-0.535978	-0.585192	-0.786182	-0.704883	-0.933735	-0.862905	-0.632052	-0.796918	-0.922906	-0.952448	-0.975158	-0.954072	-0.974595	0	0.357221	0.464086	0.378866	0.244533	0.227343	0.071676	0.147464	0.294628	0.085496	0.069695	0.036248	0.024647	0.037899	0.027657
>gi|16128815|ref|NP_415368.1| predicted transporter [Escherichia coli str. K-12 substr. MG1655]	-0.979243	-0.998809	-0.995033	-0.981745	-0.997099	-0.978837	-0.99946	-0.995902	-0.139767	-0.628148	-0.711568	-0.833696	-0.883808	-0.877488	-0.87802	0	0.002943	0.005098	0.026593	0.007529	0.032441	0.000763	0.005318	0.305591	0.190834	0.177932	0.084243	0.109879	0.089109	0.082657
>gi|16128816|ref|NP_415369.1| inner membrane protein [Escherichia coli str. K-12 substr. MG1655]	-0.514972	-0.999985	-0.999805	-0.996448	-0.999861	-0.999108	-0.99976	-0.99942	-0.767437	-0.939119	-0.947802	-0.98097	-0.989643	-0.970911	-0.973356	0	2.6e-05	0.000299	0.006873	0.000383	0.001607	0.000483	0.0017	0.334805	0.059408	0.052207	0.03639	0.017161	0.04002	0.052929
>gi|16128817|ref|NP_415370.1| glutaredoxin 1, redox coenzyme for ribonucleotide reductase (RNR1a) [Escherichia coli str. K-12 substr. MG1655]	0.056059	-0.999985	-0.999805	-0.996448	-0.999861	-0.999108	-0.99976	-0.99942	-0.767437	-0.939119	-0.947802	-0.98097	-0.989643	-0.970911	-0.973356	0	2.6e-05	0.000299	0.006873	0.000383	0.001607	0.000483	0.0017	0.334805	0.059408	0.052207	0.03639	0.017161	0.04002	0.052929
>gi|16128818|ref|NP_415371.1| conserved protein, DUF1418 family [Escherichia coli str. K-12 substr. MG1655]	-0.94218	-0.99538	-0.925366	-0.915962	-0.984304	-0.917747	-0.996547	-0.974034	-0.88015	-0.89086	-0.945403	-0.990961	-0.992644	-0.981301	-0.993898	0	0.011756	0.162741	0.22174	0.035928	0.128171	0.007179	0.032534	0.134324	0.12686	0.113333	0.011419	0.008131	0.03576	0.008657
>gi|16128819|ref|NP_415372.1| nitroreductase A, NADPH-dependent, FMN-dependent [Escherichia coli str. K-12 substr. MG1655]	-0.979492	-0.999614	-0.999608	-0.997254	-0.998914	-0.999245	-0.999875	-0.999573	-0.76369	-0.800347	-0.795241	-0.934049	-0.962423	-0.98037	-0.950574	0	0.000568	0.000511	0.006564	0.002594	0.000704	0.000196	0.000541	0.224822	0.132534	0.258272	0.066402	0.059875	0.012952	0.051433
>gi|16128820|ref|NP_415373.1| ribosomal protein S6 modification protein [Escherichia coli str. K-12 substr. MG1655]	-0.997787	-0.997055	-0.997546	-0.991107	-0.995652	-0.993336	-0.998749	-0.997105	-0.831991	-0.893884	-0.957644	-0.968368	-0.985265	-0.96854	-0.990578	0	0.004227	0.001839	0.011907	0.012295	0.008002	0.002008	0.003893	0.118917	0.072731	0.033316	0.02903	0.012372	0.050921	0.009954
>gi|16128821|ref|NP_415374.1| predicted oxidoreductase [Escherichia coli str. K-12 substr. MG1655]	-0.639252	-0.994135	-0.965515	-0.915903	-0.965981	-0.965618	-0.996836	-0.974995	-0.037836	-0.398985	-0.489562	-0.603117	-0.730146	-0.545542	-0.723968	0	0.012014	0.043563	0.120964	0.078018	0.038531	0.006519	0.046652	0.441685	0.366033	0.480197	0.343619	0.360889	0.312911	0.489644
>gi|16128822|ref|NP_415375.1| putrescine transporter subunit: periplasmic-binding component of ABC superfamily [Escherichia coli str. K-12 substr. MG1655]	-0.840402	0.206708	0.083306	-0.068402	-0.556926	-0.329386	-0.712959	-0.886371	-0.389355	-0.652799	-0.79276	-0.810323	-0.926576	-0.908283	-0.92504	0	0.691618	0.382755	0.400596	0.271728	0.260516	0.166001	0.065156	0.246281	0.223253	0.133449	0.211992	0.055084	0.055757	0.035853
>gi|90111177|ref|NP_415376.4| putrescine transporter subunit: ATP-binding component of ABC superfamily [Escherichia coli str. K-12 substr. MG1655]	-0.964596	-0.997831	-0.983812	-0.943226	-0.979476	-0.976226	-0.994192	-0.990456	-0.900333	-0.907802	-0.954886	-0.975928	-0.983297	-0.9735	-0.990248	0	0.002892	0.019556	0.106095	0.059365	0.026256	0.009551	0.009302	0.088416	0.108484	0.041038	0.023841	0.013994	0.023507	0.011315
>gi|16128824|ref|NP_415377.1| putrescine transporter subunit: membrane component of ABC superfamily [Escherichia coli str. K-12 substr. MG1655]	-0.998459	-0.999717	-0.999163	-0.993796	-0.998873	-0.995996	-0.999856	-0.999033	-0.35571	-0.376874	-0.590251	-0.781835	-0.899422	-0.92394	-0.947302	0	0.000718	0.001643	0.017122	0.003448	0.008357	0.000323	0.001219	0.429462	0.497531	0.44856	0.348727	0.176933	0.107137	0.055072
>gi|16128825|ref|NP_415378.1| putrescine transporter subunit: membrane component of ABC superfamily [Escherichia coli str. K-12 substr. MG1655]	-0.992146	-0.999845	-0.996728	-0.994353	-0.998425	-0.976675	-0.999377	-0.997789	0.01771	-0.579973	-0.663859	-0.863797	-0.854329	-0.909374	-0.951237	0	0.000219	0.004481	0.011941	0.003723	0.056742	0.001408	0.003551	0.521118	0.373981	0.261889	0.108453	0.213558	0.140513	0.043504
>gi|16128826|ref|NP_415379.1| inner membrane protein, DUF2593 family [Escherichia coli str. K-12 substr. MG1655]	-0.993361	-0.999994	-0.999697	-0.991001	-0.999489	-0.998224	-0.999787	-0.998972	-0.427866	-0.749785	-0.718237	-0.928401	-0.979611	-0.943982	-0.965759	0	6e-06	0.000429	0.027566	0.001559	0.004145	0.000388	0.001954	0.401712	0.204608	0.41805	0.05989	0.019741	0.066001	0.038498
>gi|16128827|ref|NP_415380.1| 23S rRNA m(5)U747 methyltransferase [Escherichia coli str. K-12 substr. MG1655]	-0.112083	-0.999994	-0.999697	-0.991001	-0.999489	-0.998224	-0.999787	-0.998972	-0.427866	-0.749785	-0.718237	-0.928401	-0.979611	-0.943982	-0.965759	0	6e-06	0.000429	0.027566	0.001559	0.004145	0.000388	0.001954	0.401712	0.204608	0.41805	0.05989	0.019741	0.066001	0.038498
>gi|16128828|ref|NP_415381.1| arginine binding protein, periplasmic [Escherichia coli str. K-12 substr. MG1655]	-0.221999	0.273651	-0.185078	-0.408186	-0.692225	-0.614358	-0.934922	-0.942721	-0.552628	-0.645539	-0.856565	-0.894588	-0.96396	-0.926608	-0.945525	0	0.449908	0.525764	0.435019	0.307072	0.234716	0.051504	0.034241	0.180442	0.191996	0.134009	0.058329	0.019904	0.045124	0.037967
>gi|16128829|ref|NP_415382.1| arginine transporter subunit [Escherichia coli str. K-12 substr. MG1655]	-0.98728	-0.999801	-0.992036	-0.989103	-0.996453	-0.985086	-0.999613	-0.990963	-0.02181	-0.369146	-0.582751	-0.631973	-0.799129	-0.6931	-0.907007	0	0.000382	0.013227	0.026372	0.010062	0.037789	0.000519	0.017362	0.555805	0.319459	0.237317	0.292824	0.156611	0.46853	0.084044
>gi|16128830|ref|NP_415383.1| arginine transporter subunit [Escherichia coli str. K-12 substr. MG1655]	-0.984231	-0.999819	-0.994893	-0.982476	-0.998245	-0.98231	-0.99945	-0.997071	-0.266168	-0.693244	-0.832627	-0.903404	-0.938438	-0.937148	-0.94509	0	0.000158	0.006366	0.033849	0.0045	0.030066	0.000632	0.003845	0.368286	0.267348	0.144456	0.090102	0.086257	0.084072	0.062262
>gi|16128831|ref|NP_415384.1| arginine transporter subunit [Escherichia coli str. K-12 substr. MG1655]	-0.132342	0.891027	0.754161	0.563767	0.463605	0.443475	-0.137502	-0.238386	-0.152517	-0.406828	-0.686456	-0.65294	-0.845528	-0.752834	-0.800371	0	0.095855	0.161734	0.312036	0.453591	0.26315	0.421413	0.347919	0.267717	0.21995	0.226659	0.188929	0.075754	0.109547	0.120171
>gi|16128832|ref|NP_415385.1| arginine transporter subunit [Escherichia coli str. K-12 substr. MG1655]	-0.823133	-0.985163	-0.965481	-0.944607	-0.983087	-0.970618	-0.993082	-0.989932	-0.853207	-0.897643	-0.946803	-0.972053	-0.980853	-0.976958	-0.987777	0	0.016399	0.031914	0.054182	0.02973	0.015223	0.008308	0.009298	0.117334	0.04863	0.038384	0.023547	0.016865	0.021589	0.012901
>gi|16128833|ref|NP_415386.1| lipoprotein [Escherichia coli str. K-12 substr. MG1655]	0.768042	-0.981388	-0.968917	-0.982928	-0.974521	-0.981845	-0.996548	-0.996441	-0.326948	-0.487559	-0.701889	-0.759672	-0.849503	-0.920092	-0.918045	0	0.023877	0.054526	0.014641	0.05167	0.015353	0.0024	0.003208	0.480747	0.436379	0.190278	0.183147	0.148571	0.042307	0.099411
>gi|16128834|ref|NP_415387.1| conserved protein, UPF0145 family [Escherichia coli str. K-12 substr. MG1655]	-0.94788	-0.219463	-0.38082	-0.131929	-0.509434	-0.553601	-0.860103	-0.714971	0.709424	0.698389	0.247081	0.431412	0.207878	0.186441	0.154873	0	0.62993	0.443597	0.360192	0.318668	0.276719	0.140564	0.253693	0.240421	0.170873	0.484909	0.451436	0.482463	0.311542	0.538165
>gi|16128835|ref|NP_415388.1| 1,6-anhydro-N-acetylmuramyl-L-alanine amidase, Zn-dependent; OM lipoprotein [Escherichia coli str. K-12 substr. MG1655]	-0.85066	-0.982607	-0.962036	-0.943691	-0.970159	-0.969079	-0.987913	-0.984622	-0.856263	-0.927738	-0.975507	-0.988032	-0.994071	-0.994438	-0.984586	0	0.019767	0.048918	0.076539	0.055169	0.022769	0.012389	0.011765	0.090446	0.07001	0.037265	0.013799	0.006629	0.005547	0.019234
>gi|90111178|ref|NP_415389.2| predicted NAD(P)H-binding oxidoreductase with NAD(P)-binding Rossmann-fold domain [Escherichia coli str. K-12 substr. MG1655]	-0.857225	-0.982607	-0.962036	-0.943691	-0.970159	-0.969079	-0.987913	-0.984622	-0.856263	-0.927738	-0.975507	-0.988032	-0.994071	-0.994438	-0.984586	0	0.019767	0.048918	0.076539	0.055169	0.022769	0.012389	0.011765	0.090446	0.07001	0.037265	0.013799	0.006629	0.005547	0.019234
>gi|90111179|ref|NP_415390.4| conserved protein with NAD(P)-binding Rossmann-fold domain [Escherichia coli str. K-12 substr. MG1655]	-0.988721	-0.982607	-0.962036	-0.943691	-0.970159	-0.969079	-0.987913	-0.984622	-0.856263	-0.927738	-0.975507	-0.988032	-0.994071	-0.994438	-0.984586	0	0.019767	0.048918	0.076539	0.055169	0.022769	0.012389	0.011765	0.090446	0.07001	0.037265	0.013799	0.006629	0.005547	0.019234
>gi|16128838|ref|NP_415391.1| L-allo-threonine aldolase, PLP-dependent [Escherichia coli str. K-12 substr. MG1655]	-0.839173	-0.857574	-0.792012	-0.792308	-0.908389	-0.90278	-0.981643	-0.966737	-0.802702	-0.866349	-0.933144	-0.955971	-0.975011	-0.97503	-0.982506	0	0.108713	0.175779	0.15343	0.072861	0.065484	0.011164	0.018654	0.088781	0.08506	0.056973	0.029577	0.016146	0.02069	0.014101
>gi|16128839|ref|NP_415392.1| pyruvate dehydrogenase (pyruvate oxidase), thiamin-dependent, FAD-binding [Escherichia coli str. K-12 substr. MG1655]	-0.984209	-0.857574	-0.792012	-0.792308	-0.908389	-0.90278	-0.981643	-0.966737	-0.802702	-0.866349	-0.933144	-0.955971	-0.975011	-0.97503	-0.982506	0	0.108713	0.175779	0.15343	0.072861	0.065484	0.011164	0.018654	0.088781	0.08506	0.056973	0.029577	0.016146	0.02069	0.014101
>gi|16128840|ref|NP_415393.1| HCP oxidoreductase, NADH-dependent [Escherichia coli str. K-12 substr. MG1655]	0.938239	-0.989121	-0.935622	-0.96744	-0.985126	-0.910784	-0.961373	-0.969044	0.553754	0.448913	0.045977	-0.044584	-0.038876	-0.148682	-0.198391	0	0.009703	0.093074	0.034204	0.027237	0.116277	0.061196	0.030167	0.366829	0.194149	0.412125	0.387758	0.17878	0.244984	0.252785
>gi|90111180|ref|NP_415394.4| hybrid-cluster [4Fe-2S-2O] protein in anaerobic terminal reductases [Escherichia coli str. K-12 substr. MG1655]	-0.905498	-0.995224	-0.989959	-0.979175	-0.99287	-0.985537	-0.997087	-0.995178	-0.012589	-0.251535	-0.364363	-0.456312	-0.621732	-0.583156	-0.639888	0	0.005249	0.013349	0.024446	0.016871	0.014958	0.002713	0.004816	0.298627	0.324859	0.276535	0.180132	0.12488	0.167154	0.152503
>gi|90111181|ref|NP_415395.2| predicted transporter [Escherichia coli str. K-12 substr. MG1655]	-0.998946	-0.999936	-0.99849	-0.997093	-0.999126	-0.998199	-0.999975	-0.999418	-0.450488	-0.735092	-0.679094	-0.899997	-0.924284	-0.937896	-0.943935	0	0.000165	0.003933	0.007481	0.00273	0.004427	4.9e-05	0.000889	0.450785	0.157218	0.385464	0.111058	0.09908	0.088442	0.051545
>gi|16128843|ref|NP_415396.1| aquaporin Z [Escherichia coli str. K-12 substr. MG1655]	-0.782936	-0.999772	-0.999807	-0.996744	-0.999823	-0.997998	-0.999954	-0.999595	-0.057257	-0.486387	-0.571254	-0.798564	-0.840767	-0.903435	-0.885308	0	0.000477	0.00029	0.008398	0.000518	0.005485	0.000119	0.000666	0.60416	0.403882	0.441928	0.197014	0.091205	0.085007	0.107746
>gi|16128844|ref|NP_415397.1| conserved protein with nucleoside triphosphate hydrolase domain [Escherichia coli str. K-12 substr. MG1655]	-0.889304	-0.999972	-0.999698	-0.995171	-0.999525	-0.999105	-0.999932	-0.999165	-0.859277	-0.940495	-0.95784	-0.987746	-0.993631	-0.989399	-0.987946	0	3.7e-05	0.000491	0.013814	0.001415	0.001214	0.000114	0.001167	0.161081	0.054475	0.048021	0.012037	0.006838	0.015275	0.016216
>gi|16128845|ref|NP_415398.1| conserved protein [Escherichia coli str. K-12 substr. MG1655]	-0.170473	-0.99984	-0.998547	-0.993481	-0.998685	-0.997614	-0.999829	-0.997635	-0.857113	-0.96309	-0.975735	-0.988091	-0.991271	-0.987867	-0.993386	0	0.000184	0.002354	0.015432	0.00369	0.002825	0.000169	0.003664	0.133237	0.037169	0.027173	0.013937	0.010612	0.011971	0.010759
>gi|90111182|ref|NP_415399.4| macrolide transporter subunit, membrane fusion protein (MFP) component [Escherichia coli str. K-12 substr. MG1655]	-0.975193	-0.99984	-0.998547	-0.993481	-0.998685	-0.997614	-0.999829	-0.997635	-0.857113	-0.96309	-0.975735	-0.988091	-0.991271	-0.987867	-0.993386	0	0.000184	0.002354	0.015432	0.00369	0.002825	0.000169	0.003664	0.133237	0.037169	0.027173	0.013937	0.010612	0.011971	0.010759
>gi|16128847|ref|NP_415400.1| fused macrolide transporter subunits of ABC superfamily: ATP-binding component/membrane component [Escherichia coli str. K-12 substr. MG1655]	-0.496248	-0.819779	-0.667773	-0.731625	-0.882593	-0.801962	-0.934067	-0.928784	-0.205374	-0.609804	-0.775642	-0.821259	-0.921906	-0.925122	-0.908635	0	0.289187	0.217442	0.172007	0.112815	0.118452	0.054853	0.049353	0.274083	0.176118	0.120691	0.078612	0.0483	0.043449	0.059849
>gi|16128848|ref|NP_415401.1| inhibitor of DNA replication, cold shock protein homolog [Escherichia coli str. K-12 substr. MG1655]	-0.90286	-0.996638	-0.996926	-0.975945	-0.995983	-0.997454	-0.999798	-0.997163	-0.241696	-0.103758	-0.427087	-0.478012	-0.8439	-0.734482	-0.791104	0	0.003106	0.006929	0.056607	0.010868	0.003426	0.000448	0.003597	0.396779	0.428157	0.40366	0.265612	0.080129	0.283104	0.130615
>gi|16128849|ref|NP_415402.1| regulatory protein for ClpA substrate specificity [Escherichia coli str. K-12 substr. MG1655]	-0.844003	0.071129	0.332122	0.260897	-0.301974	0.117909	-0.48584	-0.318793	-0.418093	-0.514229	-0.588335	-0.827246	-0.79672	-0.710865	-0.826477	0	0.779141	0.411826	0.446899	0.714947	0.624251	0.356436	0.424534	0.318513	0.390311	0.405942	0.13816	0.166968	0.270468	0.217309
>gi|16128850|ref|NP_415403.1| ATPase and specificity subunit of ClpA-ClpP ATP-dependent serine protease, chaperone activity [Escherichia coli str. K-12 substr. MG1655]	-0.963382	-0.557907	-0.600626	-0.578543	-0.683893	-0.807567	-0.922596	-0.962552	-0.889926	-0.924271	-0.952781	-0.979606	-0.98698	-0.982237	-0.990561	0	0.404299	0.252691	0.201349	0.207072	0.119731	0.058597	0.025872	0.081732	0.057324	0.044186	0.018705	0.012412	0.015152	0.012773
>gi|16128851|ref|NP_415404.1| translation initiation factor IF-1 [Escherichia coli str. K-12 substr. MG1655]	-0.954165	-0.82219	-0.543507	-0.866361	-0.567104	-0.771551	-0.977736	-0.933001	-0.147644	-0.427136	-0.566014	-0.718052	-0.922056	-0.874953	-0.902398	0	0.355135	0.637636	0.179672	0.515742	0.222087	0.022755	0.058219	0.462162	0.299263	0.481869	0.416758	0.068609	0.094817	0.162138
>gi|16128852|ref|NP_415405.1| leucyl/phenylalanyl-tRNA-protein transferase [Escherichia coli str. K-12 substr. MG1655]	0.828035	-0.999999	-0.999979	-0.998573	-0.999887	-0.999903	-0.999996	-0.999814	-0.489514	-0.760103	-0.700047	-0.776416	-0.863538	-0.879047	-0.910556	0	1e-06	3e-05	0.004402	0.000353	0.000165	9e-06	0.000279	0.250469	0.144123	0.209003	0.127798	0.127404	0.088817	0.04401
>gi|16128853|ref|NP_415406.1| fused glutathione, cysteine exporter subunits of ABC superfamily: membrane component/ATP-binding component [Escherichia coli str. K-12 substr. MG1655]	-0.993083	-0.999816	-0.993493	-0.975685	-0.996346	-0.991529	-0.999058	-0.995155	-0.528616	-0.770159	-0.8321	-0.94689	-0.940976	-0.956422	-0.933364	0	0.000221	0.011213	0.053696	0.009051	0.011242	0.001223	0.006707	0.15176	0.183552	0.174468	0.058353	0.113968	0.060112	0.080357
>gi|16128854|ref|NP_415407.1| fused glutathione, cysteine exporter subunits of ABC superfamily: membrane component/ATP-binding component [Escherichia coli str. K-12 substr. MG1655]	-0.842155	-0.998333	-0.976387	-0.945132	-0.993265	-0.985164	-0.997824	-0.992541	-0.608096	-0.758888	-0.770368	-0.929028	-0.960171	-0.96669	-0.914683	0	0.001844	0.0422	0.104866	0.009804	0.01268	0.001619	0.008336	0.116966	0.202264	0.270825	0.056703	0.04431	0.033461	0.079908
>gi|16128855|ref|NP_415408.1| thioredoxin reductase, FAD/NAD(P)-binding [Escherichia coli str. K-12 substr. MG1655]	-0.877164	-0.998333	-0.976387	-0.945132	-0.993265	-0.985164	-0.997824	-0.992541	-0.608096	-0.758888	-0.770368	-0.929028	-0.960171	-0.96669	-0.914683	0	0.001844	0.0422	0.104866	0.009804	0.01268	0.001619	0.008336	0.116966	0.202264	0.270825	0.056703	0.04431	0.033461	0.079908
>gi|16128856|ref|NP_415409.1| DNA-binding transcriptional dual regulator, leucine-binding [Escherichia coli str. K-12 substr. MG1655]	-0.680885	-0.826625	-0.588539	-0.653268	-0.820548	-0.412122	-0.65899	-0.799082	-0.775923	-0.943302	-0.96374	-0.950589	-0.98791	-0.977953	-0.991089	0	0.209566	0.412254	0.215332	0.163574	0.370525	0.396876	0.135464	0.143987	0.058754	0.032376	0.081699	0.0144	0.030913	0.008447
>gi|16128857|ref|NP_415410.1| DNA translocase at septal ring sorting daughter chromsomes [Escherichia coli str. K-12 substr. MG1655]	0.953011	-0.213837	-0.321888	-0.222079	-0.64486	-0.377194	-0.819291	-0.666576	-0.735494	-0.803266	-0.91597	-0.941122	-0.950639	-0.973479	-0.969691	0	0.468662	0.566842	0.431021	0.469089	0.384844	0.15644	0.238791	0.15267	0.1482	0.089568	0.046826	0.077655	0.022129	0.029494
>gi|145698236|ref|NP_415411.2| chaperone for lipoproteins [Escherichia coli str. K-12 substr. MG1655]	-0.158323	-0.805544	-0.811804	-0.838335	-0.855771	-0.885375	-0.978211	-0.973221	-0.144128	-0.466285	-0.704068	-0.692468	-0.920458	-0.845515	-0.912741	0	0.239498	0.161205	0.175878	0.205814	0.149737	0.023782	0.019596	0.409456	0.241696	0.33837	0.202148	0.098396	0.199636	0.109163
>gi|16128859|ref|NP_415412.1| recombination protein involved in processing recombnation intermediates at replication forks [Escherichia coli str. K-12 substr. MG1655]	0.200181	0.191582	-0.149334	-0.164415	-0.31999	-0.579919	-0.818926	-0.805339	-0.842616	-0.918437	-0.961492	-0.970748	-0.982854	-0.984089	-0.989245	0	0.409296	0.391042	0.275899	0.395814	0.133305	0.112749	0.24866	0.062723	0.048473	0.038537	0.024861	0.010575	0.016368	0.009889
>gi|16128860|ref|NP_415413.1| seryl-tRNA synthetase, also charges selenocysteinyl-tRNA with serine [Escherichia coli str. K-12 substr. MG1655]	-0.90789	-0.754008	-0.51385	-0.498649	-0.856564	-0.741929	-0.915375	-0.921189	-0.690673	-0.774148	-0.858514	-0.896894	-0.910609	-0.888328	-0.950006	0	0.285928	0.287829	0.271932	0.182908	0.147538	0.074302	0.052384	0.195547	0.144055	0.101844	0.088132	0.050309	0.045515	0.044705
>gi|90111183|ref|NP_415414.4| dimethyl sulfoxide reductase, anaerobic, subunit A [Escherichia coli str. K-12 substr. MG1655]	0.144267	-0.952364	-0.977582	-0.974375	-0.960138	-0.97941	-0.993213	-0.983933	-0.226265	-0.530622	-0.640429	-0.682397	-0.840368	-0.831139	-0.884944	0	0.051477	0.017277	0.018524	0.069965	0.012717	0.005213	0.018112	0.255323	0.064551	0.176563	0.141747	0.0754	0.075955	0.036501
>gi|16128862|ref|NP_415415.1| dimethyl sulfoxide reductase, anaerobic, subunit B [Escherichia coli str. K-12 substr. MG1655]	0.310446	-0.994306	-0.999943	-0.995443	-0.999639	-0.998939	-0.999961	-0.994582	-0.398615	-0.294402	-0.456143	-0.602838	-0.335293	-0.070152	-0.585398	0	0.017222	0.000113	0.008874	0.001079	0.001855	7.5e-05	0.014928	0.410789	0.570415	0.460914	0.35931	0.428961	0.479051	0.606856
>gi|16128863|ref|NP_415416.1| dimethyl sulfoxide reductase, anaerobic, subunit C [Escherichia coli str. K-12 substr. MG1655]	-0.999046	-0.999998	-0.999684	-0.989724	-0.999709	-0.998144	-0.999973	-0.999359	0.177498	-0.247906	-0.548623	-0.775357	-0.765036	-0.910641	-0.914459	0	4e-06	0.000877	0.032284	0.000888	0.005134	4e-05	0.000978	0.65878	0.567933	0.336532	0.178157	0.189593	0.073516	0.073673
>gi|16128864|ref|NP_415417.1| predicted hydrolase, isochorismatase family [Escherichia coli str. K-12 substr. MG1655]	0.021757	-0.042212	-0.169239	-0.400611	-0.652224	-0.530131	-0.743434	-0.903416	0.071039	-0.38261	-0.500657	-0.670899	-0.795076	-0.78688	-0.808376	0	0.480564	0.50585	0.29202	0.218422	0.181084	0.31076	0.059201	0.159923	0.283991	0.117115	0.218047	0.085101	0.087209	0.065097
>gi|16128865|ref|NP_415418.1| predicted MFS-type transporter [Escherichia coli str. K-12 substr. MG1655]	-0.944883	-0.99999	-0.999447	-0.993102	-0.999688	-0.996588	-0.99995	-0.99918	0.008175	-0.39773	-0.640713	-0.784606	-0.854002	-0.887047	-0.916791	0	2e-05	0.001036	0.021297	0.000915	0.009369	6.6e-05	0.001205	0.635347	0.409958	0.238126	0.123095	0.122804	0.098464	0.065538
>gi|90111184|ref|NP_415419.2| predicted transporter [Escherichia coli str. K-12 substr. MG1655]	-0.912268	-0.997605	-0.978602	-0.979347	-0.995088	-0.939954	-0.994946	-0.987375	0.006291	-0.477888	-0.757906	-0.809314	-0.914033	-0.860938	-0.93618	0	0.003027	0.029707	0.026672	0.008522	0.096217	0.010396	0.013547	0.600604	0.399279	0.193718	0.140675	0.064335	0.133599	0.06241
>gi|16128867|ref|NP_415420.1| predicted DNA-binding transcriptional regulator [Escherichia coli str. K-12 substr. MG1655]	-0.424567	-0.968793	-0.924194	-0.846865	-0.9611	-0.90087	-0.968271	-0.975336	-0.764534	-0.864793	-0.929985	-0.947537	-0.963992	-0.943004	-0.974011	0	0.029655	0.058899	0.158556	0.050831	0.076688	0.021045	0.020207	0.176746	0.079036	0.046363	0.043915	0.037401	0.031144	0.025326
>gi|16128868|ref|NP_415421.1| conserved protein [Escherichia coli str. K-12 substr. MG1655]	-0.961515	-0.99933	-0.998272	-0.975781	-0.994768	-0.994641	-0.999476	-0.993761	-0.392495	-0.576384	-0.83056	-0.789364	-0.922719	-0.930318	-0.950017	0	0.000629	0.00231	0.068743	0.014933	0.005361	0.000658	0.008479	0.230228	0.458852	0.171991	0.234678	0.064921	0.069139	0.056756
>gi|16128869|ref|NP_415422.1| pyruvate formate lyase activating enzyme 1 [Escherichia coli str. K-12 substr. MG1655]	-0.853605	-0.999865	-0.999468	-0.99208	-0.997492	-0.99808	-0.999826	-0.998028	-0.190404	-0.127915	-0.083023	-0.406164	-0.515298	-0.350999	-0.589984	0	0.000232	0.000952	0.021035	0.007747	0.002328	0.00032	0.002641	0.330134	0.4469	0.421854	0.346433	0.364577	0.241832	0.178294
>gi|16128870|ref|NP_415423.1| pyruvate formate lyase I [Escherichia coli str. K-12 substr. MG1655]	-0.220845	0.527496	0.240137	0.074877	0.090501	-0.365778	-0.540938	-0.688784	-0.190714	-0.435249	-0.701743	-0.744752	-0.845656	-0.781708	-0.877483	0	0.260533	0.227572	0.254251	0.277224	0.204351	0.223872	0.203179	0.16629	0.094024	0.214221	0.090805	0.085644	0.063706	0.065415
>gi|16128871|ref|NP_415424.1| formate channel [Escherichia coli str. K-12 substr. MG1655]	-0.96893	-0.997918	-0.999065	-0.994892	-0.99916	-0.996106	-0.99979	-0.998353	0.371532	0.037232	-0.279642	-0.462328	-0.42252	-0.507827	-0.707221	0	0.00615	0.001061	0.010336	0.002302	0.007926	0.000404	0.00224	0.586822	0.50089	0.472741	0.358244	0.38514	0.140195	0.136339
>gi|90111185|ref|NP_415425.4| conserved protein [Escherichia coli str. K-12 substr. MG1655]	-0.217142	-0.901335	-0.960505	-0.929208	-0.982532	-0.966633	-0.997086	-0.982531	0.509833	0.229616	-0.07859	0.011328	-0.280027	-0.222156	-0.200785	0	0.119506	0.036234	0.071918	0.034294	0.033472	0.003115	0.022959	0.192992	0.280234	0.272424	0.20774	0.270561	0.417884	0.415249
>gi|16128873|ref|NP_415426.1| inner membrane protein, UPF0702 family [Escherichia coli str. K-12 substr. MG1655]	-0.96568	-0.976004	-0.926836	-0.890603	-0.969524	-0.780688	-0.949633	-0.950987	-0.411409	-0.555209	-0.636789	-0.775483	-0.805494	-0.722635	-0.775209	0	0.053095	0.06613	0.106199	0.074532	0.264291	0.058221	0.042806	0.369115	0.305633	0.224819	0.209459	0.133777	0.09405	0.252407
>gi|16128874|ref|NP_415427.1| 3-phosphoserine/phosphohydroxythreonine aminotransferase [Escherichia coli str. K-12 substr. MG1655]	-0.273695	-0.024559	-0.344882	-0.360848	-0.639852	-0.63654	-0.842686	-0.918167	-0.305872	-0.627717	-0.761778	-0.778221	-0.88885	-0.852785	-0.88136	0	0.491669	0.406556	0.345085	0.292381	0.142429	0.144143	0.060032	0.17574	0.222534	0.128413	0.097099	0.056383	0.045747	0.039923
>gi|16128875|ref|NP_415428.1| 5-enolpyruvylshikimate-3-phosphate synthetase [Escherichia coli str. K-12 substr. MG1655]	-0.526143	-0.405893	-0.637033	-0.650672	-0.666736	-0.799351	-0.941204	-0.957357	0.224836	-0.072957	-0.224568	-0.278104	-0.462491	-0.485476	-0.635376	0	0.330078	0.145269	0.14467	0.212868	0.170074	0.065792	0.022152	0.239084	0.184635	0.257211	0.156323	0.222981	0.237378	0.181509
>gi|90111186|ref|NP_415429.2| predicted peptidase with chaperone function [Escherichia coli str. K-12 substr. MG1655]	0.682766	-0.899594	-0.965267	-0.972156	-0.992574	-0.99148	-0.999261	-0.99824	-0.445483	-0.508871	-0.438038	-0.629247	-0.875896	-0.859846	-0.907464	0	0.114659	0.050421	0.030993	0.008209	0.011907	0.001217	0.002223	0.248743	0.262368	0.436943	0.21775	0.141874	0.11051	0.066391
>gi|16128877|ref|NP_415430.1| cytidylate kinase [Escherichia coli str. K-12 substr. MG1655]	-0.972446	-0.930735	-0.868287	-0.737093	-0.93209	-0.920287	-0.981781	-0.970787	-0.937928	-0.939912	-0.960618	-0.989789	-0.994141	-0.988999	-0.993979	0	0.066859	0.133994	0.252675	0.086287	0.074283	0.020615	0.025811	0.052736	0.057242	0.054731	0.012584	0.005242	0.013679	0.008708
>gi|16128878|ref|NP_415431.1| 30S ribosomal subunit protein S1 [Escherichia coli str. K-12 substr. MG1655]	-0.308346	-0.748355	-0.597689	-0.633209	-0.816183	-0.80621	-0.952945	-0.917767	-0.120771	-0.45823	-0.371192	-0.58013	-0.800677	-0.772082	-0.852077	0	0.204707	0.34857	0.403983	0.181014	0.156755	0.047006	0.095308	0.311619	0.348188	0.434793	0.270824	0.14863	0.103604	0.10365
>gi|16128879|ref|NP_415432.1| integration host factor (IHF), DNA-binding protein, beta subunit [Escherichia coli str. K-12 substr. MG1655]	-0.844581	-0.748355	-0.597689	-0.633209	-0.816183	-0.80621	-0.952945	-0.917767	-0.120771	-0.45823	-0.371192	-0.58013	-0.800677	-0.772082	-0.852077	0	0.204707	0.34857	0.403983	0.181014	0.156755	0.047006	0.095308	0.311619	0.348188	0.434793	0.270824	0.14863	0.103604	0.10365
>gi|90111187|ref|NP_415433.4| inner membrane protein, ComEC family of competence proteins [Escherichia coli str. K-12 substr. MG1655]	-0.968966	-1	-0.999993	-0.998047	-0.999942	-0.99994	-0.999996	-0.999952	-0.12246	-0.376598	-0.439315	-0.677015	-0.806079	-0.88577	-0.893388	0	0	1.4e-05	0.006156	0.000182	0.000125	1e-05	5.6e-05	0.294415	0.486524	0.654786	0.465633	0.332398	0.223478	0.123132
>gi|16128881|ref|NP_415434.1| fused lipid transporter subunits of ABC superfamily: membrane component/ATP-binding component [Escherichia coli str. K-12 substr. MG1655]	-0.162395	-0.986532	-0.963262	-0.958547	-0.979532	-0.968832	-0.993543	-0.990647	-0.334048	-0.679124	-0.855143	-0.919409	-0.97169	-0.952578	-0.962478	0	0.017255	0.042175	0.045485	0.023637	0.022612	0.006336	0.011473	0.222485	0.243966	0.105629	0.047781	0.022485	0.045293	0.040854
>gi|16128882|ref|NP_415435.1| lipid A 4'kinase [Escherichia coli str. K-12 substr. MG1655]	-0.447456	-0.999906	-0.996938	-0.982523	-0.998211	-0.993858	-0.999707	-0.997859	-0.388598	-0.734552	-0.800027	-0.843432	-0.969017	-0.95356	-0.940765	0	0.000115	0.007388	0.053929	0.005429	0.01115	0.000586	0.002458	0.301014	0.167481	0.186463	0.17445	0.036244	0.072021	0.062724
>gi|16128883|ref|NP_415436.1| conserved protein [Escherichia coli str. K-12 substr. MG1655]	-0.989551	-0.999981	-0.999585	-0.99187	-0.999443	-0.99943	-0.999906	-0.999326	-0.888886	-0.930023	-0.974209	-0.989673	-0.99591	-0.994655	-0.992122	0	2.9e-05	0.000696	0.025003	0.001703	0.000782	0.000171	0.000921	0.076147	0.075504	0.039239	0.009972	0.004741	0.005422	0.008497
>gi|16128884|ref|NP_415437.1| conserved protein, UPF0434 family [Escherichia coli str. K-12 substr. MG1655]	-0.988302	-0.999654	-0.99848	-0.996171	-0.99312	-0.994314	-0.999212	-0.997002	-0.596918	-0.62856	-0.680228	-0.816233	-0.892101	-0.824956	-0.944327	0	0.000514	0.002756	0.008066	0.021664	0.008819	0.001396	0.00543	0.302557	0.494379	0.245912	0.157035	0.129063	0.227525	0.053665
>gi|16128885|ref|NP_415438.1| 3-deoxy-manno-octulosonate cytidylyltransferase [Escherichia coli str. K-12 substr. MG1655]	-0.831483	-0.964375	-0.861942	-0.830792	-0.936153	-0.916631	-0.973525	-0.936279	-0.748165	-0.795377	-0.91425	-0.945163	-0.972663	-0.969139	-0.987765	0	0.04268	0.162591	0.203524	0.165145	0.091988	0.048287	0.07249	0.156152	0.127728	0.096601	0.046522	0.024229	0.032243	0.01287
>gi|16128886|ref|NP_415439.1| conserved protein [Escherichia coli str. K-12 substr. MG1655]	-0.597377	-0.999582	-0.99448	-0.978942	-0.996877	-0.993294	-0.999376	-0.995459	-0.029449	-0.58153	-0.644327	-0.653166	-0.901406	-0.885395	-0.86095	0	0.000705	0.006683	0.060748	0.005506	0.008316	0.001094	0.005634	0.358682	0.205214	0.232825	0.308056	0.074834	0.072953	0.194421
>gi|16128887|ref|NP_415440.1| conserved protein, DUF218 superfamily [Escherichia coli str. K-12 substr. MG1655]	0.018299	-0.999761	-0.998766	-0.991023	-0.99895	-0.995615	-0.999856	-0.999046	0.030606	-0.382037	-0.261206	-0.64558	-0.703389	-0.87307	-0.875442	0	0.000343	0.002079	0.02509	0.00315	0.007485	0.000231	0.001059	0.249827	0.573867	0.665707	0.466858	0.493495	0.243066	0.115134
>gi|16128888|ref|NP_415441.1| predicted S-adenosyl-L-methionine-dependent methyltransferase [Escherichia coli str. K-12 substr. MG1655]	-0.975419	-0.999163	-0.989701	-0.964584	-0.989224	-0.987245	-0.996104	-0.992687	-0.936608	-0.957563	-0.991185	-0.993428	-0.996333	-0.993383	-0.995846	0	0.001062	0.013712	0.072896	0.028993	0.010885	0.005762	0.007855	0.054255	0.045131	0.010936	0.00661	0.004774	0.00787	0.006268
>gi|16128889|ref|NP_415442.1| chromosome condensin MukBEF, kleisin-like subunit, binds calcium [Escherichia coli str. K-12 substr. MG1655]	-0.790604	-0.666884	-0.361694	-0.358876	-0.699779	-0.705505	-0.831346	-0.890929	-0.802979	-0.866503	-0.955226	-0.974524	-0.984041	-0.980174	-0.986941	0	0.276548	0.402148	0.36439	0.24367	0.170468	0.230445	0.09529	0.112316	0.10055	0.046308	0.023889	0.015073	0.021852	0.018817
>gi|226524705|ref|NP_415443.2| chromosome condensin MukBEF, MukE subunit [Escherichia coli str. K-12 substr. MG1655]	-0.650906	-0.733027	-0.672833	-0.556425	-0.841636	-0.698206	-0.941692	-0.888012	-0.611303	-0.803359	-0.84276	-0.870765	-0.876326	-0.827272	-0.921134	0	0.52024	0.431387	0.338327	0.302408	0.215067	0.083641	0.130669	0.233471	0.172666	0.112097	0.074981	0.086571	0.13116	0.073558
>gi|16128891|ref|NP_415444.1| chromosome condensin MukBEF, ATPase and DNA-binding subunit [Escherichia coli str. K-12 substr. MG1655]	-0.396152	-0.866669	-0.629209	-0.419925	-0.876241	-0.782058	-0.959363	-0.903219	-0.925244	-0.948735	-0.973599	-0.988037	-0.987932	-0.981264	-0.993212	0	0.21164	0.402172	0.451142	0.208641	0.177797	0.045136	0.107424	0.051669	0.054763	0.024625	0.016298	0.012917	0.030665	0.010141
>gi|16128892|ref|NP_415445.1| murein L,D-transpeptidase [Escherichia coli str. K-12 substr. MG1655]	0.818585	-0.898833	-0.858349	-0.860825	-0.894395	-0.826057	-0.969955	-0.963341	-0.368792	-0.722246	-0.875773	-0.925846	-0.943315	-0.973292	-0.9621	0	0.150631	0.136242	0.103475	0.176404	0.130572	0.020022	0.02098	0.332796	0.199795	0.129162	0.074943	0.077909	0.031054	0.042592
>gi|16128893|ref|NP_415446.1| conserved protein [Escherichia coli str. K-12 substr. MG1655]	-0.630851	-0.995949	-0.993291	-0.98504	-0.993461	-0.991669	-0.996784	-0.998346	-0.856743	-0.951524	-0.970683	-0.986407	-0.985656	-0.992326	-0.976731	0	0.004232	0.008045	0.014111	0.010985	0.010358	0.005377	0.001815	0.113848	0.049006	0.038883	0.020627	0.017014	0.007447	0.055532
>gi|16128894|ref|NP_415447.1| predicted metal-binding enzyme [Escherichia coli str. K-12 substr. MG1655]	-0.958574	-0.999994	-0.999915	-0.99548	-0.998709	-0.999699	-0.999983	-0.999701	-0.181711	-0.300495	-0.572621	-0.690127	-0.730372	-0.818838	-0.889326	0	9e-06	0.000127	0.01306	0.004063	0.000516	3.9e-05	0.000471	0.433668	0.36274	0.366909	0.121882	0.238077	0.125265	0.053555
>gi|16128895|ref|NP_415448.1| aspartate aminotransferase, PLP-dependent [Escherichia coli str. K-12 substr. MG1655]	0.731365	0.649645	0.230382	-0.001836	0.08105	-0.307884	-0.470313	-0.804358	-0.244309	-0.574818	-0.715688	-0.704502	-0.866146	-0.82689	-0.839682	0	0.170519	0.462521	0.37459	0.55675	0.550613	0.286893	0.206895	0.201686	0.20922	0.153243	0.121084	0.053927	0.055055	0.059141
>gi|16128896|ref|NP_415449.1| outer membrane porin 1a (Ia;b;F) [Escherichia coli str. K-12 substr. MG1655]	-0.899514	0.649645	0.230382	-0.001836	0.08105	-0.307884	-0.470313	-0.804358	-0.244309	-0.574818	-0.715688	-0.704502	-0.866146	-0.82689	-0.839682	0	0.170519	0.462521	0.37459	0.55675	0.550613	0.286893	0.206895	0.201686	0.20922	0.153243	0.121084	0.053927	0.055055	0.059141
>gi|16128897|ref|NP_415450.1| asparaginyl tRNA synthetase [Escherichia coli str. K-12 substr. MG1655]	0.346758	0.059112	-0.227917	-0.167455	-0.422366	-0.455013	-0.661043	-0.843621	-0.07034	-0.456978	-0.577673	-0.595303	-0.798937	-0.787291	-0.805183	0	0.378155	0.351993	0.495186	0.497158	0.207742	0.222582	0.089001	0.222016	0.231444	0.180472	0.293106	0.088875	0.06613	0.10239
>gi|16128898|ref|NP_415451.1| nicotinate phosphoribosyltransferase [Escherichia coli str. K-12 substr. MG1655]	-0.996934	-0.997271	-0.991532	-0.967112	-0.995211	-0.989807	-0.994017	-0.995974	-0.926314	-0.932418	-0.976582	-0.989604	-0.994104	-0.991113	-0.992031	0	0.001733	0.007971	0.04785	0.006337	0.008756	0.006891	0.005353	0.056483	0.065231	0.037421	0.010862	0.008055	0.012858	0.012199
>gi|16128899|ref|NP_415452.1| aminopeptidase N [Escherichia coli str. K-12 substr. MG1655]	-0.407691	0.073184	-0.07338	-0.020672	-0.254879	-0.565024	-0.699899	-0.850261	-0.697356	-0.80889	-0.921445	-0.942866	-0.965074	-0.958477	-0.976684	0	0.232761	0.340887	0.289728	0.32678	0.156918	0.192098	0.083368	0.147952	0.143075	0.067207	0.04258	0.031281	0.032862	0.02233
>gi|16128900|ref|NP_415453.1| alkanesulfonate transporter subunit [Escherichia coli str. K-12 substr. MG1655]	-0.951085	-0.998933	-0.936359	-0.8667	-0.984077	-0.947736	-0.997481	-0.982482	-0.618923	-0.77316	-0.669726	-0.882088	-0.963354	-0.965011	-0.952235	0	0.001372	0.130256	0.293854	0.036707	0.087368	0.003065	0.016534	0.136127	0.165665	0.511072	0.156621	0.05053	0.042755	0.040215
>gi|90111188|ref|NP_415454.4| putative alkanesulfonate transporter subunit [Escherichia coli str. K-12 substr. MG1655]	-0.983215	-0.999999	-0.999978	-0.994929	-0.999826	-0.999439	-0.999997	-0.999889	-0.094943	-0.172402	-0.288227	-0.588986	-0.649631	-0.827818	-0.863004	0	2e-06	4.9e-05	0.016016	0.000546	0.001591	5e-06	0.000165	0.564486	0.623844	0.543493	0.520511	0.524913	0.260252	0.130982
>gi|16128902|ref|NP_415455.1| alkanesulfonate monooxygenase, FMNH(2)-dependent [Escherichia coli str. K-12 substr. MG1655]	-0.38106	-0.999999	-0.999978	-0.994929	-0.999826	-0.999439	-0.999997	-0.999889	-0.094943	-0.172402	-0.288227	-0.588986	-0.649631	-0.827818	-0.863004	0	2e-06	4.9e-05	0.016016	0.000546	0.001591	5e-06	0.000165	0.564486	0.623844	0.543493	0.520511	0.524913	0.260252	0.130982
>gi|90111189|ref|NP_415456.4| putative aliphatic sulfonate binding protein [Escherichia coli str. K-12 substr. MG1655]	-0.645904	-0.984828	-0.973958	-0.925984	-0.979372	-0.931739	-0.994055	-0.99206	-0.726383	-0.859112	-0.923665	-0.958682	-0.974633	-0.961309	-0.947126	0	0.019609	0.026119	0.101842	0.029407	0.074308	0.004326	0.007199	0.168123	0.09668	0.116183	0.057965	0.041386	0.078458	0.069127
>gi|16128904|ref|NP_415457.1| NAD(P)H-dependent FMN reductase [Escherichia coli str. K-12 substr. MG1655]	-0.993157	-0.984828	-0.973958	-0.925984	-0.979372	-0.931739	-0.994055	-0.99206	-0.726383	-0.859112	-0.923665	-0.958682	-0.974633	-0.961309	-0.947126	0	0.019609	0.026119	0.101842	0.029407	0.074308	0.004326	0.007199	0.168123	0.09668	0.116183	0.057965	0.041386	0.078458	0.069127
>gi|90111190|ref|NP_415458.2| predicted fimbrial-like adhesin protein [Escherichia coli str. K-12 substr. MG1655]	0.975024	-0.696792	-0.599042	-0.433668	-0.703039	-0.599308	-0.923823	-0.73111	0.85027	0.810854	0.684237	0.583666	0.477561	0.607431	0.446895	0	0.45874	0.61859	0.621765	0.62092	0.397275	0.129685	0.323632	0.152156	0.166544	0.300153	0.258817	0.309024	0.305388	0.309039
>gi|16128906|ref|NP_415459.1| predicted periplasmic pilin chaperone [Escherichia coli str. K-12 substr. MG1655]	0.94472	-0.823293	-0.88281	-0.952906	-0.956834	-0.897974	-0.99575	-0.978694	0.116259	-0.580686	-0.504278	-0.705672	-0.71577	-0.689509	-0.82163	0	0.341045	0.23242	0.050083	0.09613	0.150956	0.00438	0.04081	0.292044	0.210631	0.256112	0.118897	0.275354	0.324999	0.136951
>gi|16128907|ref|NP_415460.1| predicted outer membrane usher protein [Escherichia coli str. K-12 substr. MG1655]	-0.427854	-0.536511	-0.855999	-0.843187	-0.968526	-0.947034	-0.989708	-0.97903	0.503042	0.173193	-0.320704	-0.237082	-0.569423	-0.624813	-0.641833	0	0.304435	0.113965	0.105041	0.029539	0.033973	0.010668	0.017635	0.131727	0.21501	0.334948	0.291298	0.201885	0.207404	0.086979
>gi|16128908|ref|NP_415461.1| predicted fimbrial-like adhesin protein [Escherichia coli str. K-12 substr. MG1655]	0.956729	-0.99728	-0.990786	-0.987959	-0.994194	-0.970175	-0.998429	-0.990662	0.812366	0.565959	0.290497	0.109048	-0.049152	-0.051788	-0.137719	0	0.002647	0.013886	0.016229	0.011408	0.038396	0.002722	0.01189	0.107005	0.216633	0.346932	0.27259	0.244887	0.2248	0.189959
>gi|16128909|ref|NP_415462.1| predicted fimbrial-like adhesin protein [Escherichia coli str. K-12 substr. MG1655]	0.165916	-0.892391	-0.927717	-0.827444	-0.94908	-0.930711	-0.99031	-0.971802	0.297328	-0.012168	-0.269884	-0.24324	-0.483377	-0.531497	-0.533176	0	0.120677	0.105872	0.237037	0.107784	0.069693	0.013214	0.027975	0.299149	0.418498	0.305126	0.328736	0.238495	0.146011	0.215524
>gi|90111191|ref|NP_415463.2| predicted fimbrial-like adhesin protein [Escherichia coli str. K-12 substr. MG1655]	0.208188	-0.995723	-0.99824	-0.991013	-0.998559	-0.997994	-0.999828	-0.998702	0.411665	-0.09861	-0.18816	-0.422537	-0.660923	-0.588069	-0.660996	0	0.004896	0.002164	0.019893	0.002957	0.002159	0.000309	0.002375	0.356148	0.397112	0.287951	0.222457	0.070062	0.202284	0.11961
>gi|90111192|ref|NP_415464.4| predicted periplasmic pilini chaperone [Escherichia coli str. K-12 substr. MG1655]	0.486557	-0.995028	-0.997192	-0.990395	-0.998047	-0.98118	-0.99939	-0.997766	0.186136	-0.423524	-0.383791	-0.662714	-0.715253	-0.826698	-0.841044	0	0.012466	0.003272	0.022361	0.005546	0.028729	0.001116	0.001925	0.28504	0.510261	0.525225	0.404968	0.498442	0.378275	0.159105
>gi|16128912|ref|NP_415465.1| dihydro-orotate oxidase, FMN-linked [Escherichia coli str. K-12 substr. MG1655]	-0.967314	-0.938495	-0.96184	-0.91645	-0.969077	-0.931082	-0.987969	-0.987443	-0.778314	-0.89576	-0.948737	-0.958266	-0.980713	-0.964467	-0.981891	0	0.082187	0.03823	0.074628	0.055222	0.044217	0.01209	0.008849	0.121801	0.049721	0.046458	0.032509	0.012226	0.050499	0.01385
>gi|90111193|ref|NP_415466.4| predicted protein [Escherichia coli str. K-12 substr. MG1655]	-0.387664	-0.985127	-0.965508	-0.93636	-0.982047	-0.950755	-0.996098	-0.984784	-0.673458	-0.790995	-0.878235	-0.902885	-0.920799	-0.83432	-0.911534	0	0.037046	0.036264	0.079135	0.051185	0.044218	0.004515	0.016892	0.213969	0.263428	0.11592	0.119946	0.074149	0.153622	0.10408
>gi|16128914|ref|NP_415467.1| predicted 2Fe-2S cluster-containing protein; 6-N-hydroxylaminopurine resistance protein [Escherichia coli str. K-12 substr. MG1655]	0.327833	-0.988716	-0.980944	-0.973202	-0.990774	-0.960903	-0.985825	-0.993919	-0.608333	-0.79701	-0.886813	-0.924469	-0.969775	-0.958125	-0.967456	0	0.009958	0.026443	0.025231	0.014573	0.030641	0.017501	0.004044	0.152087	0.087626	0.083859	0.063386	0.026163	0.036998	0.036471
>gi|16128915|ref|NP_415468.1| 23S rRNA mG2445 methyltransferase, SAM-dependent [Escherichia coli str. K-12 substr. MG1655]	-0.609159	-0.994442	-0.989983	-0.97827	-0.992471	-0.986446	-0.99686	-0.996053	-0.770058	-0.907397	-0.959577	-0.971609	-0.988284	-0.98541	-0.984964	0	0.006619	0.009975	0.028763	0.010452	0.010907	0.003138	0.003436	0.111071	0.059225	0.044011	0.026887	0.009812	0.012972	0.013956
>gi|16128916|ref|NP_415469.1| fused predicted transporter subunits of ABC superfamily: ATP-binding components [Escherichia coli str. K-12 substr. MG1655]	-0.869178	-0.901975	-0.677398	-0.608763	-0.863776	-0.795784	-0.933575	-0.934003	-0.822745	-0.892634	-0.937285	-0.959496	-0.967952	-0.964555	-0.980353	0	0.122742	0.269479	0.320429	0.169444	0.129195	0.057829	0.068444	0.119166	0.057752	0.042931	0.026996	0.021804	0.027875	0.016831
>gi|16128917|ref|NP_415470.1| paraquat-inducible membrane protein A [Escherichia coli str. K-12 substr. MG1655]	-0.911855	-0.999997	-0.999714	-0.996887	-0.999319	-0.997109	-0.99992	-0.99904	-0.174883	-0.632593	-0.644405	-0.740523	-0.869102	-0.878874	-0.870273	0	5e-06	0.000427	0.008753	0.002126	0.006986	0.000133	0.001351	0.476335	0.249808	0.210469	0.233737	0.109915	0.063005	0.221802
>gi|16128918|ref|NP_415471.1| paraquat-inducible protein B [Escherichia coli str. K-12 substr. MG1655]	0.03288	-0.756131	-0.65912	-0.736675	-0.756325	-0.705518	-0.925211	-0.952394	-0.376601	-0.740496	-0.869812	-0.891947	-0.961255	-0.937655	-0.949924	0	0.238091	0.211887	0.211059	0.163812	0.129379	0.051465	0.021433	0.140769	0.117924	0.087055	0.074904	0.034705	0.058253	0.033727
>gi|145698237|ref|NP_415472.2| conserved protein [Escherichia coli str. K-12 substr. MG1655]	-0.770745	-0.980473	-0.848867	-0.917179	-0.964299	-0.893567	-0.991027	-0.947538	0.51179	-0.10564	-0.428229	-0.508197	-0.809932	-0.849834	-0.751102	0	0.027269	0.336744	0.201325	0.06464	0.123239	0.007243	0.058461	0.305138	0.41571	0.481877	0.300329	0.166536	0.105722	0.186846
>gi|16128920|ref|NP_415473.1| ribosome modulation factor [Escherichia coli str. K-12 substr. MG1655]	0.107259	-0.992876	-0.939017	-0.94558	-0.983893	-0.956182	-0.993631	-0.946429	-0.48105	-0.803719	-0.995876	-0.989903	-0.996504	-0.995746	-0.992422	0	0.012259	0.12627	0.106215	0.034568	0.075141	0.014333	0.053476	0.654557	0.411314	0.006018	0.018909	0.006096	0.004825	0.016736
>gi|16128921|ref|NP_415474.1| beta-hydroxydecanoyl thioester dehydrase [Escherichia coli str. K-12 substr. MG1655]	-0.954636	-0.965076	-0.885985	-0.843578	-0.96823	-0.831861	-0.984485	-0.951439	0.706321	0.506331	0.48775	0.398456	0.472428	0.170713	0.371301	0	0.074836	0.181362	0.19957	0.080701	0.209453	0.015466	0.037514	0.134274	0.377013	0.39217	0.213718	0.371209	0.430987	0.297943
>gi|16128922|ref|NP_415475.1| predicted peptidase [Escherichia coli str. K-12 substr. MG1655]	-0.800143	-0.999209	-0.992928	-0.979152	-0.99473	-0.993807	-0.999375	-0.995834	-0.270729	-0.435731	-0.484703	-0.720523	-0.875013	-0.865134	-0.78298	0	0.00066	0.008709	0.04703	0.014031	0.005442	0.001226	0.004985	0.312798	0.414979	0.530607	0.169219	0.108043	0.09443	0.303469
>gi|16128923|ref|NP_415476.1| Ter macrodomain organizer matS-binding protein [Escherichia coli str. K-12 substr. MG1655]	-0.938154	-0.998128	-0.983972	-0.936874	-0.993719	-0.994872	-0.996182	-0.995473	-0.942308	-0.976808	-0.996109	-0.995158	-0.996052	-0.996531	-0.998085	0	0.005366	0.020015	0.19575	0.018237	0.005018	0.007675	0.006038	0.07972	0.038114	0.003404	0.008224	0.004787	0.004512	0.003217
>gi|16128924|ref|NP_415477.1| outer membrane protein A (3a;II*;G;d) [Escherichia coli str. K-12 substr. MG1655]	-0.099727	-0.998128	-0.983972	-0.936874	-0.993719	-0.994872	-0.996182	-0.995473	-0.942308	-0.976808	-0.996109	-0.995158	-0.996052	-0.996531	-0.998085	0	0.005366	0.020015	0.19575	0.018237	0.005018	0.007675	0.006038	0.07972	0.038114	0.003404	0.008224	0.004787	0.004512	0.003217
>gi|16128925|ref|NP_415478.1| SOS cell division inhibitor [Escherichia coli str. K-12 substr. MG1655]	0.306583	-0.999922	-0.999119	-0.988369	-0.99953	-0.99958	-0.999948	-0.998605	-0.184189	-0.377235	-0.532788	-0.705274	-0.917045	-0.901103	-0.864141	0	0.00019	0.001451	0.035527	0.001276	0.000419	7.5e-05	0.001934	0.256484	0.464202	0.405946	0.235635	0.082774	0.106624	0.108719
>gi|16128926|ref|NP_415479.1| required for expression of CRP-S-dependent promoters [Escherichia coli str. K-12 substr. MG1655]	-0.96651	-0.999533	-0.992336	-0.981515	-0.997096	-0.991644	-0.99905	-0.994275	-0.759706	-0.919618	-0.968155	-0.975311	-0.986949	-0.98334	-0.991209	0	0.000531	0.013118	0.047549	0.00861	0.009234	0.001041	0.0077	0.209764	0.061205	0.036429	0.021778	0.01708	0.014665	0.00894
>gi|90111194|ref|NP_415480.2| inner membrane protein [Escherichia coli str. K-12 substr. MG1655]	-0.993694	-0.999814	-0.998339	-0.992355	-0.998444	-0.997328	-0.999498	-0.998101	-0.787558	-0.840872	-0.908198	-0.965737	-0.980738	-0.98755	-0.970688	0	0.000189	0.002011	0.013535	0.003838	0.002526	0.000616	0.002574	0.152389	0.137033	0.113435	0.046128	0.023803	0.013466	0.042248
>gi|16128928|ref|NP_415481.1| inner membrane protein, DUF307 family [Escherichia coli str. K-12 substr. MG1655]	-0.443523	-0.999676	-0.999091	-0.998788	-0.999428	-0.99457	-0.999941	-0.999657	0.074092	-0.292898	-0.162198	-0.521527	-0.645333	-0.75733	-0.685399	0	0.00076	0.002604	0.003543	0.001651	0.014737	0.000135	0.000458	0.667745	0.508101	0.576797	0.466896	0.528119	0.375432	0.395449
>gi|16128929|ref|NP_415482.1| DNA helicase IV [Escherichia coli str. K-12 substr. MG1655]	-0.919833	-0.999681	-0.996579	-0.980583	-0.998458	-0.997542	-0.999562	-0.998245	-0.900321	-0.944816	-0.977199	-0.991806	-0.994552	-0.994819	-0.991767	0	0.000419	0.005162	0.055992	0.003855	0.002096	0.000701	0.002086	0.069519	0.053539	0.029632	0.009538	0.006113	0.005163	0.009497
>gi|90111195|ref|NP_415483.2| methylglyoxal synthase [Escherichia coli str. K-12 substr. MG1655]	-0.99164	-0.991575	-0.981181	-0.967436	-0.989396	-0.988842	-0.998843	-0.995923	-0.714414	-0.785837	-0.882516	-0.956569	-0.978251	-0.986394	-0.98567	0	0.01652	0.035803	0.061999	0.024576	0.012542	0.001006	0.004539	0.271034	0.219026	0.130405	0.031039	0.020693	0.013096	0.014874
>gi|16128931|ref|NP_415484.1| conserved protein [Escherichia coli str. K-12 substr. MG1655]	0.140184	0.501923	0.104284	-0.014585	-0.132252	-0.421709	-0.723	-0.91113	-0.117484	-0.557431	-0.667797	-0.793973	-0.892056	-0.847919	-0.891078	0	0.413969	0.400522	0.414725	0.407964	0.29283	0.176731	0.051705	0.525321	0.244377	0.132778	0.110122	0.055304	0.097287	0.081314
>gi|90111196|ref|NP_415485.4| predicted CoA-binding protein with NAD(P)-binding Rossmann-fold domain [Escherichia coli str. K-12 substr. MG1655]	-0.881503	0.501923	0.104284	-0.014585	-0.132252	-0.421709	-0.723	-0.91113	-0.117484	-0.557431	-0.667797	-0.793973	-0.892056	-0.847919	-0.891078	0	0.413969	0.400522	0.414725	0.407964	0.29283	0.176731	0.051705	0.525321	0.244377	0.132778	0.110122	0.055304	0.097287	0.081314
>gi|145698238|ref|NP_415486.4| heat shock protein involved in degradation of mutant DnaA; hemimethylated oriC DNA-binding protein [Escherichia coli str. K-12 substr. MG1655]	0.804813	-0.999121	-0.995932	-0.931771	-0.966052	-0.989825	-0.999644	-0.986837	-0.623661	-0.750504	-0.862528	-0.86075	-0.974056	-0.975966	-0.992106	0	0.001495	0.008902	0.193822	0.095132	0.016217	0.000741	0.017627	0.562341	0.188326	0.227679	0.311756	0.032521	0.03147	0.008133
>gi|145698239|ref|NP_415487.4| 23S rRNA m(5)C1962 methyltransferase, SAM-dependent [Escherichia coli str. K-12 substr. MG1655]	-0.905679	-0.999121	-0.995932	-0.931771	-0.966052	-0.989825	-0.999644	-0.986837	-0.623661	-0.750504	-0.862528	-0.86075	-0.974056	-0.975966	-0.992106	0	0.001495	0.008902	0.193822	0.095132	0.016217	0.000741	0.017627	0.562341	0.188326	0.227679	0.311756	0.032521	0.03147	0.008133
>gi|16128935|ref|NP_415488.1| weak acylphosphatase [Escherichia coli str. K-12 substr. MG1655]	-0.886117	-0.999938	-0.998342	-0.985406	-0.999398	-0.99788	-0.998789	-0.997294	-0.03772	-0.306411	-0.56943	-0.540049	-0.879419	-0.86876	-0.737589	0	9.5e-05	0.004631	0.045468	0.001777	0.003401	0.003396	0.00285	0.570798	0.484049	0.305812	0.289889	0.082192	0.087648	0.298199
>gi|90111197|ref|NP_415489.4| sulfurtransferase required for 2-thiolation step of mnm(5)-s(2)U34-tRNA synthesis [Escherichia coli str. K-12 substr. MG1655]	-0.095512	-0.999938	-0.998342	-0.985406	-0.999398	-0.99788	-0.998789	-0.997294	-0.03772	-0.306411	-0.56943	-0.540049	-0.879419	-0.86876	-0.737589	0	9.5e-05	0.004631	0.045468	0.001777	0.003401	0.003396	0.00285	0.570798	0.484049	0.305812	0.289889	0.082192	0.087648	0.298199
>gi|16128937|ref|NP_415490.1| HflBKC-binding inner membrane protein, UPF0005 family [Escherichia coli str. K-12 substr. MG1655]	-0.581119	-0.999576	-0.996545	-0.996807	-0.999229	-0.992214	-0.999897	-0.998232	0.125541	-0.182054	-0.286698	-0.552512	-0.618296	-0.557404	-0.814491	0	0.000543	0.007333	0.004563	0.002143	0.021866	0.000142	0.003197	0.673049	0.549727	0.395794	0.27273	0.248701	0.36633	0.15366
>gi|16128938|ref|NP_415491.1| hydrogenase 1, small subunit [Escherichia coli str. K-12 substr. MG1655]	-0.344612	-0.999732	-0.999461	-0.996983	-0.999169	-0.997679	-0.999633	-0.998684	-0.419141	-0.61013	-0.716661	-0.810301	-0.885962	-0.863139	-0.922232	0	0.00024	0.000733	0.004613	0.00232	0.003074	0.000531	0.00176	0.301352	0.154455	0.190235	0.109915	0.057961	0.071717	0.041248
>gi|16128939|ref|NP_415492.1| hydrogenase 1, large subunit [Escherichia coli str. K-12 substr. MG1655]	-0.355502	-0.997256	-0.996669	-0.992489	-0.99676	-0.994523	-0.999039	-0.997875	-0.137069	-0.563009	-0.633088	-0.739261	-0.860291	-0.877729	-0.847755	0	0.003642	0.00367	0.01069	0.007701	0.005425	0.000845	0.001862	0.145038	0.203136	0.136462	0.113221	0.056393	0.078591	0.130343
>gi|16128940|ref|NP_415493.1| hydrogenase 1, b-type cytochrome subunit [Escherichia coli str. K-12 substr. MG1655]	-0.985783	-0.999998	-0.999937	-0.994827	-0.999794	-0.999557	-0.999953	-0.999227	-0.290536	-0.669262	-0.713157	-0.906678	-0.982448	-0.948902	-0.959274	0	2e-06	0.000119	0.016069	0.000592	0.000895	8.8e-05	0.001145	0.573091	0.29777	0.510696	0.116149	0.020585	0.066775	0.07829
>gi|16128941|ref|NP_415494.1| protein involved in processing of HyaA and HyaB proteins [Escherichia coli str. K-12 substr. MG1655]	-0.502299	-0.999803	-0.997034	-0.981697	-0.994156	-0.998011	-0.999875	-0.99443	-0.505058	-0.453786	-0.72823	-0.56911	-0.826737	-0.838138	-0.801779	0	0.000421	0.007293	0.051176	0.016762	0.002353	0.000216	0.007962	0.227628	0.397002	0.158764	0.333332	0.125798	0.208819	0.195718
>gi|16128942|ref|NP_415495.1| protein involved in processing of HyaA and HyaB proteins [Escherichia coli str. K-12 substr. MG1655]	0.777057	-0.973908	-0.859438	-0.85191	-0.942236	-0.880166	-0.970736	-0.956677	0.624404	0.199465	-0.133052	-0.293768	-0.511014	-0.640284	-0.685994	0	0.030989	0.197665	0.224916	0.118214	0.127398	0.048258	0.042961	0.197459	0.414698	0.266511	0.287915	0.31212	0.214974	0.178134
>gi|16128943|ref|NP_415496.1| protein involved in nickel incorporation into hydrogenase-1 proteins [Escherichia coli str. K-12 substr. MG1655]	-0.905231	-0.999969	-0.999651	-0.997035	-0.997381	-0.999288	-0.999972	-0.999205	-0.383453	-0.310459	-0.451498	-0.645751	-0.832443	-0.823251	-0.880965	0	4e-05	0.000361	0.008172	0.008215	0.001073	4.8e-05	0.001226	0.418329	0.587747	0.459294	0.397155	0.21065	0.188713	0.164181
>gi|16128944|ref|NP_415497.1| cytochrome bd-II oxidase, subunit I [Escherichia coli str. K-12 substr. MG1655]	-0.971711	-0.998262	-0.986824	-0.961688	-0.992706	-0.985049	-0.994597	-0.987967	-0.047479	-0.431596	-0.788419	-0.845473	-0.92516	-0.921798	-0.932293	0	0.003851	0.016894	0.082351	0.011078	0.016972	0.010879	0.016236	0.507515	0.465246	0.141071	0.127645	0.061604	0.050178	0.068693
>gi|16128945|ref|NP_415498.1| cytochrome bd-II oxidase, subunit II [Escherichia coli str. K-12 substr. MG1655]	-0.997302	-0.999842	-0.999078	-0.991374	-0.999288	-0.989087	-0.999656	-0.998433	0.143925	-0.192783	-0.543572	-0.729452	-0.754247	-0.868703	-0.90762	0	0.000444	0.001885	0.025492	0.002188	0.027149	0.000633	0.00213	0.587801	0.550448	0.342895	0.187543	0.182773	0.057985	0.08671
>gi|145698240|ref|YP_001165313.1| hypothetical protein b4592 [Escherichia coli str. K-12 substr. MG1655]	-0.999893	-0.999869	-0.988177	-0.972477	-0.999689	-0.997969	-0.998827	-0.999343	0.402522	0.36696	0.013194	0.103144	-0.085318	0.129574	-0.058219	0	0.000274	0.036248	0.086921	0.000856	0.005243	0.00214	0.001386	0.744469	0.632982	0.885574	0.838896	0.721038	0.649052	0.838811
>gi|16128946|ref|NP_415500.1| phosphoanhydride phosphorylase [Escherichia coli str. K-12 substr. MG1655]	0.059393	-0.997017	-0.986035	-0.984366	-0.994061	-0.983246	-0.997577	-0.995448	-0.100581	-0.573964	-0.53186	-0.76709	-0.846191	-0.899011	-0.802314	0	0.003494	0.016955	0.025858	0.012565	0.014071	0.002776	0.004381	0.36915	0.255679	0.297371	0.141198	0.181562	0.122454	0.158264
>gi|16128947|ref|NP_415501.1| cryptic autophosphorylating protein tyrosine kinase Etk [Escherichia coli str. K-12 substr. MG1655]	-0.405038	-0.348309	0.056107	-0.237643	-0.352248	-0.455914	-0.798772	-0.891185	-0.655653	-0.851888	-0.91409	-0.946575	-0.973593	-0.972246	-0.975237	0	0.319235	0.324993	0.302232	0.15196	0.172657	0.131092	0.057156	0.131258	0.076601	0.066727	0.031835	0.017441	0.019395	0.025284
>gi|90111198|ref|NP_415502.4| phosphotyrosine-protein phosphatase [Escherichia coli str. K-12 substr. MG1655]	-0.963368	-0.999926	-0.999403	-0.988571	-0.998722	-0.999148	-0.999904	-0.999326	-0.943148	-0.962467	-0.983585	-0.993865	-0.996261	-0.993105	-0.996818	0	8.7e-05	0.00106	0.034855	0.003503	0.001064	0.000104	0.000826	0.05938	0.043504	0.015448	0.006901	0.003712	0.009725	0.003699
>gi|16128949|ref|NP_415503.1| lipoprotein required for formation of the O-antigen capsule, predicted exopolysaccharide export protein [Escherichia coli str. K-12 substr. MG1655]	0.872923	0.462393	0.470276	0.221401	0.143945	0.131514	-0.097132	-0.438673	0.189137	-0.356093	-0.584827	-0.71612	-0.832603	-0.863973	-0.871408	0	0.369491	0.317931	0.313117	0.305517	0.174397	0.235216	0.28179	0.244321	0.258171	0.174856	0.098499	0.084145	0.092461	0.084435
>gi|16128950|ref|NP_415504.1| conserved protein [Escherichia coli str. K-12 substr. MG1655]	-0.148188	0.107	-0.56709	-0.505053	-0.80243	-0.706758	-0.86381	-0.875834	0.269831	-0.114339	-0.560777	-0.3513	-0.741955	-0.66078	-0.783701	0	0.512773	0.39385	0.231898	0.243123	0.164259	0.127735	0.077615	0.266649	0.246422	0.266815	0.258561	0.096813	0.206955	0.101147
>gi|16128951|ref|NP_415505.1| conserved protein [Escherichia coli str. K-12 substr. MG1655]	-0.780104	-0.734675	-0.581438	-0.698856	-0.777645	-0.697085	-0.879593	-0.805587	-0.060297	-0.543473	-0.78792	-0.832181	-0.932363	-0.960002	-0.936714	0	0.271001	0.357005	0.300991	0.300183	0.283041	0.103319	0.143135	0.431157	0.262744	0.179626	0.187749	0.073398	0.040075	0.060825
>gi|16128952|ref|NP_415506.1| predicted outer membrane lipoprotein [Escherichia coli str. K-12 substr. MG1655]	0.802827	-0.913964	-0.760981	-0.895168	-0.887228	-0.869294	-0.966568	-0.979392	0.253478	-0.3415	-0.522057	-0.671886	-0.879375	-0.873451	-0.851865	0	0.072753	0.149257	0.080361	0.172157	0.121392	0.030944	0.014285	0.334045	0.329671	0.365645	0.134882	0.095245	0.059043	0.135276
>gi|90111199|ref|NP_415507.2| predicted protein [Escherichia coli str. K-12 substr. MG1655]	0.990585	-0.73445	-0.811311	-0.904482	-0.946837	-0.926873	-0.98823	-0.926009	0.842494	0.843963	0.498019	0.476493	0.518723	0.397771	0.279388	0	0.439532	0.567123	0.117005	0.102355	0.132306	0.035094	0.123709	0.226745	0.272241	0.652951	0.628539	0.462409	0.619539	0.699095
>gi|94541103|ref|YP_588445.1| IS1 repressor TnpA [Escherichia coli str. K-12 substr. MG1655]	0.401317	-0.999724	-0.999917	-0.998255	-0.999936	-0.999724	-0.999862	-0.999872	-0.509051	-0.414534	-0.755725	-0.488932	-0.765965	-0.874296	-0.917556	0	0.000595	0.000164	0.003894	0.000101	0.000563	0.000277	0.000192	0.40013	0.549803	0.227109	0.52426	0.485684	0.135667	0.142979
>gi|16128954|ref|NP_415508.1| IS1 transposase B [Escherichia coli str. K-12 substr. MG1655]	-0.906752	-0.999948	-0.999865	-0.991783	-0.999678	-0.999068	-0.999786	-0.999419	-0.871015	-0.940609	-0.982953	-0.978816	-0.996251	-0.99508	-0.989205	0	6.9e-05	0.000134	0.02538	0.000965	0.001283	0.000354	0.00077	0.188535	0.058839	0.029	0.037052	0.005454	0.004549	0.021603
>gi|16128955|ref|NP_415509.1| stress protein, member of the CspA-family [Escherichia coli str. K-12 substr. MG1655]	-0.708121	-0.851374	-0.941456	-0.932397	-0.974727	-0.907934	-0.984505	-0.989143	-0.373586	-0.85336	-0.889785	-0.717893	-0.980839	-0.960083	-0.968529	0	0.382478	0.096373	0.085628	0.030438	0.091726	0.022402	0.01164	0.441126	0.091016	0.063093	0.412585	0.014888	0.037929	0.035872
>gi|16128956|ref|NP_415510.1| cold shock protein homolog, cold-inducible [Escherichia coli str. K-12 substr. MG1655]	0.988247	0.635505	0.061676	-0.194607	-0.412174	-0.172457	-0.8703	-0.84751	0.407664	0.3999	0.312983	0.218024	-0.59399	-0.304487	-0.176206	0	0.454301	0.368796	0.516705	0.51957	0.420104	0.206466	0.129272	0.346055	0.461137	0.570125	0.550715	0.238004	0.417963	0.451293
>gi|16128957|ref|NP_415511.1| cold shock gene [Escherichia coli str. K-12 substr. MG1655]	0.767809	-0.972439	-0.992877	-0.992661	-0.997531	-0.956313	-0.999775	-0.990213	0.31833	0.105876	0.093284	-0.072533	-0.470098	-0.300151	-0.478318	0	0.078174	0.013309	0.012337	0.006029	0.096202	0.000344	0.01887	0.409875	0.470269	0.626616	0.430767	0.337982	0.441348	0.486396
>gi|94541104|ref|YP_588446.1| Multicopy suppressor of secG(Cs) and fabA6(Ts); predicted regulator of phosphatidylethanolamine synthesis [Escherichia coli str. K-12 substr. MG1655]	-0.482728	-0.972439	-0.992877	-0.992661	-0.997531	-0.956313	-0.999775	-0.990213	0.31833	0.105876	0.093284	-0.072533	-0.470098	-0.300151	-0.478318	0	0.078174	0.013309	0.012337	0.006029	0.096202	0.000344	0.01887	0.409875	0.470269	0.626616	0.430767	0.337982	0.441348	0.486396
>gi|16128958|ref|NP_415512.1| predicted 4Fe-4S membrane protein [Escherichia coli str. K-12 substr. MG1655]	-0.928593	-0.999989	-0.999867	-0.997791	-0.999692	-0.996172	-0.999809	-0.99938	-0.227246	-0.720273	-0.747643	-0.816554	-0.903539	-0.877603	-0.943788	0	1.8e-05	0.000175	0.005904	0.000809	0.009899	0.000361	0.000755	0.544773	0.156337	0.207288	0.125633	0.107052	0.124135	0.047117
>gi|90111200|ref|NP_415513.2| hybrid sensory histidine kinase in two-component regulatory system with TorR [Escherichia coli str. K-12 substr. MG1655]	-0.82612	-0.969699	-0.869018	-0.799459	-0.953748	-0.917268	-0.984853	-0.970207	-0.775474	-0.850378	-0.888984	-0.969412	-0.969102	-0.980239	-0.977048	0	0.039359	0.164524	0.207089	0.088008	0.054816	0.025809	0.030079	0.131585	0.146553	0.129825	0.025096	0.044294	0.025175	0.030682
>gi|16128960|ref|NP_415514.1| periplasmic sensory protein associated with the TorRS two-component regulatory system [Escherichia coli str. K-12 substr. MG1655]	-0.82025	-0.999708	-0.99459	-0.97314	-0.996745	-0.991756	-0.998165	-0.996375	-0.744915	-0.877088	-0.958564	-0.972326	-0.991829	-0.983773	-0.97284	0	0.00038	0.008076	0.071814	0.007983	0.006724	0.002248	0.004008	0.136521	0.0665	0.053221	0.028528	0.010909	0.025884	0.037819
>gi|16128961|ref|NP_415515.1| DNA-binding response regulator in two-component regulatory system with TorS [Escherichia coli str. K-12 substr. MG1655]	-0.899482	-0.992969	-0.883491	-0.90742	-0.972881	-0.903265	-0.980797	-0.965859	-0.788943	-0.833923	-0.927179	-0.958992	-0.970964	-0.963219	-0.985388	0	0.007591	0.13815	0.089241	0.050988	0.100629	0.017229	0.026216	0.144733	0.106159	0.057689	0.056076	0.040453	0.043593	0.016778
>gi|16128962|ref|NP_415516.1| trimethylamine N-oxide (TMAO) reductase I, cytochrome c-type subunit [Escherichia coli str. K-12 substr. MG1655]	-0.767439	-0.992969	-0.883491	-0.90742	-0.972881	-0.903265	-0.980797	-0.965859	-0.788943	-0.833923	-0.927179	-0.958992	-0.970964	-0.963219	-0.985388	0	0.007591	0.13815	0.089241	0.050988	0.100629	0.017229	0.026216	0.144733	0.106159	0.057689	0.056076	0.040453	0.043593	0.016778
>gi|16128963|ref|NP_415517.1| trimethylamine N-oxide (TMAO) reductase I, catalytic subunit [Escherichia coli str. K-12 substr. MG1655]	-0.457749	-0.992969	-0.883491	-0.90742	-0.972881	-0.903265	-0.980797	-0.965859	-0.788943	-0.833923	-0.927179	-0.958992	-0.970964	-0.963219	-0.985388	0	0.007591	0.13815	0.089241	0.050988	0.100629	0.017229	0.026216	0.144733	0.106159	0.057689	0.056076	0.040453	0.043593	0.016778
>gi|16128964|ref|NP_415518.1| chaperone involved in maturation of TorA subunit of trimethylamine N-oxide reductase system I [Escherichia coli str. K-12 substr. MG1655]	-0.997726	-0.990879	-0.955908	-0.931737	-0.985545	-0.973719	-0.993308	-0.976851	-0.523296	-0.71405	-0.871344	-0.90658	-0.954159	-0.919207	-0.945974	0	0.011137	0.05891	0.076573	0.030525	0.019691	0.008342	0.032261	0.360362	0.235373	0.120745	0.078958	0.028197	0.085462	0.045086
>gi|16128965|ref|NP_415519.1| modulator of CbpA co-chaperone [Escherichia coli str. K-12 substr. MG1655]	-0.999892	-0.999315	-0.980228	-0.970034	-0.994084	-0.99385	-0.999613	-0.993963	-0.686882	-0.53126	-0.837282	-0.9519	-0.978924	-0.975289	-0.984606	0	0.001657	0.057359	0.086987	0.017524	0.009446	0.000596	0.007127	0.241553	0.475131	0.210671	0.046869	0.019864	0.02949	0.020396
>gi|16128966|ref|NP_415520.1| curved DNA-binding protein, DnaJ homologue that functions as a co-chaperone of DnaK [Escherichia coli str. K-12 substr. MG1655]	-0.371046	-0.837903	-0.835512	-0.834846	-0.900866	-0.923239	-0.947549	-0.961619	-0.867016	-0.908553	-0.967028	-0.977043	-0.992017	-0.987706	-0.988117	0	0.150659	0.21271	0.196918	0.096158	0.042368	0.039976	0.035061	0.074048	0.062785	0.033805	0.015649	0.004184	0.01016	0.01283
>gi|16128967|ref|NP_415521.1| predicted protein [Escherichia coli str. K-12 substr. MG1655]	0.958898	-0.939854	-0.985618	-0.95156	-0.985348	-0.966186	-0.999485	-0.972864	0.453467	0.193901	-0.491439	-0.243687	-0.522755	-0.574651	-0.780223	0	0.061214	0.025932	0.066834	0.035331	0.041508	0.000727	0.041689	0.384352	0.374593	0.348177	0.477362	0.30936	0.420358	0.219957
>gi|16128968|ref|NP_415522.1| glucose-1-phosphatase/inositol phosphatase [Escherichia coli str. K-12 substr. MG1655]	-0.013747	-0.114007	-0.47663	-0.373902	-0.602626	-0.621178	-0.75955	-0.823984	-0.366371	-0.623186	-0.802524	-0.782283	-0.91622	-0.858756	-0.906705	0	0.26516	0.317074	0.316061	0.106038	0.122584	0.145887	0.144984	0.214383	0.16086	0.111839	0.126673	0.01876	0.085382	0.043011
>gi|16128969|ref|NP_415523.1| predicted protein [Escherichia coli str. K-12 substr. MG1655]	-0.50833	-0.963056	-0.957352	-0.882436	-0.985136	-0.994327	-0.999881	-0.989228	0.160901	-0.128941	-0.054776	-0.333991	-0.705156	-0.600697	-0.641977	0	0.061449	0.088968	0.357894	0.039603	0.007366	0.000168	0.015777	0.353462	0.473761	0.578116	0.455849	0.301872	0.29563	0.290692
>gi|16128970|ref|NP_415524.1| NAD(P)H:quinone oxidoreductase [Escherichia coli str. K-12 substr. MG1655]	0.481459	-0.963056	-0.957352	-0.882436	-0.985136	-0.994327	-0.999881	-0.989228	0.160901	-0.128941	-0.054776	-0.333991	-0.705156	-0.600697	-0.641977	0	0.061449	0.088968	0.357894	0.039603	0.007366	0.000168	0.015777	0.353462	0.473761	0.578116	0.455849	0.301872	0.29563	0.290692
>gi|94541090|ref|NP_415525.2| conserved protein [Escherichia coli str. K-12 substr. MG1655]	0.619523	-0.991854	-0.998266	-0.997703	-0.999673	-0.999797	-0.999779	-0.999871	-0.45064	-0.433066	-0.648849	-0.183025	-0.888935	-0.662587	-0.689631	0	0.022706	0.004612	0.007067	0.000546	0.000359	0.000664	0.000187	0.466807	0.637546	0.482365	0.762674	0.260975	0.448764	0.394899
>gi|90111201|ref|NP_415526.4| pyrimidine permease [Escherichia coli str. K-12 substr. MG1655]	-0.880775	-0.997754	-0.995249	-0.985436	-0.997939	-0.977332	-0.999867	-0.997065	0.233119	-0.390915	-0.631473	-0.77346	-0.784427	-0.912197	-0.887009	0	0.00662	0.010557	0.029109	0.005258	0.054867	0.000142	0.00387	0.585559	0.325493	0.345836	0.172972	0.172068	0.065262	0.11356
>gi|90111202|ref|NP_415527.4| flavin:NADH reductase [Escherichia coli str. K-12 substr. MG1655]	0.891309	-0.99993	-0.999724	-0.998499	-0.999713	-0.998379	-0.999656	-0.998965	0.18171	-0.030541	-0.342137	-0.526896	-0.509317	-0.615403	-0.687847	0	7.5e-05	0.000412	0.002924	0.000808	0.002515	0.000856	0.001593	0.46202	0.432539	0.320044	0.253186	0.124874	0.215738	0.246166
>gi|16128974|ref|NP_415528.1| malonic semialdehyde reductase [Escherichia coli str. K-12 substr. MG1655]	0.879657	-0.912485	-0.932028	-0.972256	-0.972033	-0.974633	-0.995243	-0.994871	0.33952	-0.063018	-0.120647	-0.306627	-0.473786	-0.414087	-0.570184	0	0.111332	0.094694	0.023827	0.053255	0.02642	0.005791	0.005734	0.263593	0.444644	0.3229	0.461713	0.367799	0.263634	0.192498
>gi|16128975|ref|NP_415529.1| putative aminoacrylate hydrolase [Escherichia coli str. K-12 substr. MG1655]	-0.282028	-0.999974	-0.999683	-0.994533	-0.998997	-0.999407	-0.99995	-0.999185	-0.872475	-0.891043	-0.956309	-0.964378	-0.980602	-0.986021	-0.974508	0	1.3e-05	0.000402	0.015844	0.003044	0.00056	7.1e-05	0.001202	0.153985	0.081968	0.040696	0.022732	0.018394	0.022273	0.031851
>gi|16128976|ref|NP_415530.1| putative aminoacrylate peracid reductase [Escherichia coli str. K-12 substr. MG1655]	-0.588458	-0.928613	-0.874438	-0.894893	-0.962377	-0.910016	-0.986567	-0.989178	-0.509238	-0.615731	-0.78545	-0.906798	-0.931523	-0.928529	-0.9362	0	0.073176	0.261721	0.1164	0.065651	0.087477	0.018484	0.011654	0.302662	0.238864	0.142274	0.078424	0.05054	0.059167	0.054617
>gi|90111203|ref|NP_415531.2| ureidoacrylate amidohydrolase [Escherichia coli str. K-12 substr. MG1655]	0.810798	-0.308977	-0.441175	-0.673634	-0.795841	-0.675322	-0.910236	-0.945425	0.055305	-0.313603	-0.56492	-0.711413	-0.781313	-0.799085	-0.761328	0	0.354071	0.367005	0.264782	0.2408	0.228011	0.054937	0.030767	0.330361	0.242298	0.178675	0.151571	0.147764	0.096168	0.100628
>gi|49176071|ref|NP_415532.3| pyrimidine oxygenase, FMN-dependent [Escherichia coli str. K-12 substr. MG1655]	0.773629	0.287642	0.0999	-0.056079	0.086173	-0.48413	-0.565386	-0.74958	0.443513	0.220261	-0.270178	-0.252669	-0.437164	-0.349123	-0.413116	0	0.422241	0.444409	0.402509	0.349031	0.236179	0.165698	0.228044	0.219569	0.315632	0.3781	0.269846	0.147664	0.245629	0.264385
>gi|16128979|ref|NP_415533.1| DNA-binding transcriptional repressor for rut operon [Escherichia coli str. K-12 substr. MG1655]	-0.921471	-0.99259	-0.948729	-0.93126	-0.978161	-0.956636	-0.992667	-0.991036	-0.863113	-0.940095	-0.978617	-0.990412	-0.993536	-0.990533	-0.992352	0	0.007097	0.078255	0.075005	0.031286	0.034535	0.007527	0.009117	0.091963	0.049725	0.024069	0.013256	0.006153	0.009103	0.009521
>gi|16128980|ref|NP_415534.1| fused DNA-binding transcriptional regulator/proline dehydrogenase/pyrroline-5-carboxylate dehydrogenase [Escherichia coli str. K-12 substr. MG1655]	-0.05682	-0.922311	-0.835739	-0.82898	-0.921329	-0.905778	-0.981813	-0.970014	-0.736299	-0.820535	-0.900947	-0.924504	-0.958463	-0.966504	-0.962919	0	0.047436	0.137062	0.09848	0.069987	0.042527	0.012198	0.019645	0.111062	0.094935	0.061252	0.049925	0.024133	0.03145	0.027759
>gi|16128981|ref|NP_415535.1| proline:sodium symporter [Escherichia coli str. K-12 substr. MG1655]	-0.967855	-0.999972	-0.998759	-0.997939	-0.999726	-0.998786	-0.999956	-0.999633	-0.218684	-0.570579	-0.713052	-0.86244	-0.912722	-0.900798	-0.928222	0	3.8e-05	0.003648	0.005705	0.000835	0.002831	7.2e-05	0.000576	0.588859	0.267447	0.161587	0.107085	0.058247	0.097972	0.046626
>gi|16128982|ref|NP_415537.1| inactive ferrous ion transporter EfeUOB [Escherichia coli str. K-12 substr. MG1655]	0.208163	0.978633	0.89993	0.861565	0.873546	0.620974	0.619348	-0.028566	-0.641445	-0.780303	-0.878131	-0.891229	-0.930737	-0.901389	-0.939064	0	0.012588	0.063954	0.139278	0.136439	0.225352	0.203951	0.587804	0.161937	0.146243	0.087309	0.070218	0.033881	0.041236	0.061749
>gi|16128983|ref|NP_415538.1| deferrrochelatase, periplasmic [Escherichia coli str. K-12 substr. MG1655]	-0.584744	-0.893083	-0.912355	-0.828046	-0.895203	-0.931576	-0.963827	-0.985536	-0.833182	-0.883584	-0.94755	-0.954697	-0.974944	-0.969076	-0.96807	0	0.0864	0.059944	0.100006	0.105149	0.030896	0.03413	0.008706	0.06762	0.077694	0.04497	0.035443	0.023022	0.023997	0.026254
>gi|16128984|ref|NP_415539.1| conserved protein with nucleoside triphosphate hydrolase domain [Escherichia coli str. K-12 substr. MG1655]	-0.886131	-0.993832	-0.987784	-0.958039	-0.995439	-0.974478	-0.990111	-0.992532	-0.872388	-0.925034	-0.96327	-0.956426	-0.98935	-0.983177	-0.991624	0	0.005279	0.01161	0.048148	0.006158	0.017989	0.012871	0.00677	0.112532	0.058222	0.032663	0.0663	0.012924	0.014969	0.011706
>gi|16128985|ref|NP_415540.1| required for biofilm adhesin polysaccharide PGA synthesis [Escherichia coli str. K-12 substr. MG1655]	-0.941766	-0.988947	-0.955389	-0.93305	-0.981047	-0.943426	-0.944832	-0.967668	-0.854179	-0.927859	-0.989501	-0.9971	-0.997933	-0.994687	-0.994998	0	0.016872	0.066002	0.103211	0.037945	0.066162	0.142281	0.038631	0.150562	0.066259	0.016363	0.002877	0.003482	0.009151	0.008292
>gi|16128986|ref|NP_415541.1| predicted glycosyl transferase [Escherichia coli str. K-12 substr. MG1655]	-0.76971	-0.99997	-0.99946	-0.998231	-0.999509	-0.996778	-0.999797	-0.999269	-0.318162	-0.684576	-0.74616	-0.897619	-0.965887	-0.926187	-0.95006	0	4.1e-05	0.000956	0.00469	0.001455	0.008053	0.00041	0.000946	0.511567	0.217118	0.275913	0.082221	0.032931	0.087602	0.06267
>gi|16128987|ref|NP_415542.1| biofilm adhesin polysaccharide PGA export lipoprotein with a polysaccharide deacetylase activity needed for export [Escherichia coli str. K-12 substr. MG1655]	-0.902384	-0.795151	-0.839859	-0.825299	-0.901329	-0.900224	-0.938041	-0.960577	-0.694144	-0.871493	-0.956904	-0.973583	-0.992531	-0.989938	-0.986042	0	0.147316	0.154286	0.149473	0.079769	0.051961	0.050599	0.023896	0.237499	0.106367	0.045287	0.020644	0.005151	0.011276	0.0158
>gi|16128988|ref|NP_415543.1| biofilm adhesin polysaccharide PGA export, predicted OM protein [Escherichia coli str. K-12 substr. MG1655]	-0.953283	-0.980865	-0.978367	-0.961063	-0.987751	-0.987549	-0.988775	-0.992037	-0.539171	-0.783621	-0.875297	-0.922502	-0.976456	-0.991536	-0.95476	0	0.014132	0.019852	0.081914	0.015232	0.007712	0.021166	0.008024	0.510534	0.212716	0.145569	0.067042	0.020966	0.007472	0.052732
>gi|16128989|ref|NP_415544.1| diguanylate cyclase [Escherichia coli str. K-12 substr. MG1655]	0.767646	-0.990828	-0.978972	-0.978907	-0.989464	-0.932765	-0.997444	-0.985485	-0.207209	-0.588257	-0.788935	-0.866468	-0.933675	-0.914305	-0.944892	0	0.007144	0.023235	0.017222	0.018212	0.081234	0.004358	0.016231	0.450562	0.306078	0.122476	0.086846	0.070324	0.065069	0.058343
>gi|16128990|ref|NP_415545.1| IS3 transposase B [Escherichia coli str. K-12 substr. MG1655]	-0.968959	-0.999874	-0.999768	-0.997842	-0.999848	-0.999407	-0.999835	-0.999322	-0.833734	-0.936414	-0.983045	-0.986632	-0.990924	-0.993401	-0.992737	0	0.000328	0.000353	0.005761	0.000307	0.000451	0.000233	0.001192	0.150449	0.072316	0.023414	0.014963	0.013575	0.006364	0.01023
>gi|226524706|ref|NP_415546.2| IS3 transposase A [Escherichia coli str. K-12 substr. MG1655]	-0.444617	-0.970844	-0.769621	-0.857416	-0.974012	-0.948886	-0.991909	-0.953726	-0.848176	-0.879488	-0.98415	-0.989145	-0.986614	-0.993067	-0.996547	0	0.065989	0.373913	0.270605	0.056511	0.048208	0.015816	0.058886	0.152204	0.319737	0.022024	0.017988	0.023402	0.008284	0.005078
>gi|16128993|ref|NP_415548.1| predicted inner membrane protein [Escherichia coli str. K-12 substr. MG1655]	-0.900596	-0.999884	-0.997974	-0.997576	-0.999345	-0.985113	-0.998831	-0.998289	-0.530039	-0.842596	-0.850115	-0.952638	-0.972446	-0.920275	-0.949564	0	0.00018	0.003903	0.004977	0.001906	0.04089	0.003384	0.002633	0.559025	0.162495	0.113685	0.035735	0.038622	0.108794	0.084346
>gi|90111205|ref|NP_415551.2| glyoxylate/hydroxypyruvate reductase A [Escherichia coli str. K-12 substr. MG1655]	-0.723933	-0.99975	-0.997109	-0.983963	-0.998028	-0.995849	-0.998863	-0.997538	-0.616738	-0.782159	-0.880147	-0.91348	-0.975615	-0.9786	-0.949142	0	0.000251	0.003316	0.04361	0.005202	0.003543	0.00182	0.002512	0.128677	0.159507	0.104494	0.097442	0.021755	0.022521	0.049476
>gi|16128997|ref|NP_415552.1| predicted zinc-binding hydrolase [Escherichia coli str. K-12 substr. MG1655]	-0.99981	-0.999754	-0.999785	-0.995673	-0.999079	-0.999756	-0.999976	-0.999738	-0.89298	-0.881395	-0.945751	-0.965663	-0.985892	-0.985663	-0.990427	0	0.000315	0.000274	0.010323	0.002815	0.000256	3.9e-05	0.000427	0.104939	0.089754	0.051618	0.028841	0.015125	0.011056	0.009954
>gi|16128998|ref|NP_415553.1| conserved protein, REMP family [Escherichia coli str. K-12 substr. MG1655]	-0.630071	-0.999503	-0.995056	-0.985304	-0.993968	-0.992546	-0.999847	-0.990335	0.700734	0.571354	0.301399	0.52697	0.099873	0.194057	0.236575	0	0.000862	0.010008	0.034086	0.018595	0.017368	0.000241	0.015492	0.200949	0.282728	0.479308	0.281106	0.399993	0.494848	0.501991
>gi|90111206|ref|NP_415554.4| inner membrane protein, DUF1097 family [Escherichia coli str. K-12 substr. MG1655]	-0.986446	-0.999993	-0.999926	-0.998752	-0.999889	-0.999645	-0.999998	-0.999957	-0.092342	-0.46529	-0.535041	-0.636984	-0.716119	-0.763197	-0.816728	0	1.6e-05	0.000183	0.003853	0.000339	0.001016	6e-06	6.7e-05	0.667588	0.343131	0.358319	0.201356	0.206304	0.307707	0.166307
>gi|16129000|ref|NP_415555.1| Curli production assembly/transport outer membrane lipoprotein [Escherichia coli str. K-12 substr. MG1655]	0.857719	-0.420732	-0.452134	-0.634635	-0.66812	-0.651607	-0.890877	-0.934487	-0.162451	-0.609652	-0.777933	-0.828633	-0.921386	-0.914862	-0.91106	0	0.488514	0.286	0.210147	0.194776	0.104476	0.073756	0.03852	0.172751	0.218914	0.135877	0.122904	0.070296	0.08664	0.082374
>gi|16129001|ref|NP_415556.1| outer membrane protein involved in curlin assembly/transport [Escherichia coli str. K-12 substr. MG1655]	0.878472	0.101093	-0.18547	-0.310077	-0.749104	-0.427712	-0.913394	-0.842301	0.59758	0.322506	-0.277717	-0.073061	-0.587685	-0.542208	-0.55345	0	0.675181	0.493877	0.529697	0.350929	0.203851	0.09798	0.128367	0.328871	0.372328	0.304606	0.449708	0.173239	0.214586	0.252094
>gi|16129002|ref|NP_415557.1| curli production assembly/transport componen [Escherichia coli str. K-12 substr. MG1655]	-0.595898	-0.753753	-0.884578	-0.933281	-0.966154	-0.976062	-0.995205	-0.988792	-0.108815	-0.438502	-0.632074	-0.795183	-0.919079	-0.915304	-0.856958	0	0.3995	0.20242	0.089111	0.033819	0.018737	0.004447	0.01475	0.394284	0.376985	0.267551	0.13738	0.042478	0.08417	0.10787
>gi|16129003|ref|NP_415558.1| DNA-binding transcriptional activator for csgBA [Escherichia coli str. K-12 substr. MG1655]	-0.92599	-0.997406	-0.999539	-0.996822	-0.999118	-0.999296	-0.999944	-0.999529	-0.864357	-0.905249	-0.947087	-0.967804	-0.990383	-0.992037	-0.994091	0	0.005982	0.000878	0.008679	0.002265	0.00112	7.8e-05	0.000745	0.113203	0.080274	0.109599	0.061725	0.011404	0.010984	0.006928
>gi|16129004|ref|NP_415559.1| curlin nucleator protein, minor subunit in curli complex [Escherichia coli str. K-12 substr. MG1655]	0.966486	-0.907691	-0.827859	-0.870661	-0.97507	-0.935187	-0.984498	-0.988407	-0.103518	-0.211898	-0.660127	-0.74315	-0.837148	-0.96916	-0.932437	0	0.15625	0.243638	0.14814	0.038809	0.06537	0.037851	0.014077	0.638706	0.689134	0.541428	0.299596	0.322453	0.059478	0.108477
>gi|16129005|ref|NP_415560.1| cryptic curlin major subunit [Escherichia coli str. K-12 substr. MG1655]	0.515815	-0.997429	-0.982785	-0.959627	-0.995423	-0.995997	-0.999815	-0.995829	0.747342	0.538467	0.275386	0.254276	-0.464603	-0.331883	-0.349385	0	0.004204	0.0342	0.099898	0.00943	0.004059	0.000398	0.007196	0.295832	0.402385	0.578482	0.475064	0.296896	0.358315	0.403727
>gi|16129006|ref|NP_415561.1| curli assembly protein [Escherichia coli str. K-12 substr. MG1655]	-0.419801	-0.996816	-0.996503	-0.991922	-0.996493	-0.998083	-0.999011	-0.998206	0.278481	-0.223285	-0.354852	-0.597075	-0.667914	-0.730578	-0.620156	0	0.00582	0.006389	0.02241	0.007841	0.001891	0.001942	0.002568	0.528551	0.584989	0.491127	0.386097	0.534236	0.173553	0.439153
>gi|16129007|ref|NP_415562.1| predicted protein [Escherichia coli str. K-12 substr. MG1655]	0.9007	-0.99455	-0.96215	-0.974908	-0.991739	-0.972448	-0.999174	-0.993472	-0.217439	-0.304528	-0.803589	-0.501098	-0.953738	-0.896804	-0.878569	0	0.004597	0.094333	0.026928	0.013491	0.029505	0.001495	0.010752	0.386478	0.526961	0.156458	0.6171	0.054854	0.070657	0.149888
>gi|16129008|ref|NP_415563.1| RNase III inhibitor during cold shock, UPF0189 family [Escherichia coli str. K-12 substr. MG1655]	-0.095409	-0.984353	-0.976803	-0.960108	-0.982708	-0.977341	-0.997165	-0.987112	-0.766409	-0.802958	-0.924867	-0.917001	-0.961847	-0.97334	-0.967789	0	0.030599	0.031054	0.07429	0.042349	0.017917	0.003705	0.012042	0.08749	0.101528	0.070991	0.066134	0.033877	0.026155	0.029373
>gi|90111207|ref|NP_415564.2| predicted hydrolase [Escherichia coli str. K-12 substr. MG1655]	-0.831415	-0.999478	-0.998349	-0.987904	-0.998244	-0.993525	-0.998943	-0.998231	-0.798423	-0.912916	-0.957669	-0.974344	-0.991989	-0.983234	-0.982185	0	0.000714	0.002213	0.025043	0.004216	0.007455	0.001662	0.00208	0.121773	0.06532	0.039888	0.029811	0.008106	0.021984	0.025248
>gi|16129010|ref|NP_415565.1| membrane protein required for succinylation of osmoregulated periplasmic glucans (OPGs) [Escherichia coli str. K-12 substr. MG1655]	-0.800844	-0.999478	-0.998349	-0.987904	-0.998244	-0.993525	-0.998943	-0.998231	-0.798423	-0.912916	-0.957669	-0.974344	-0.991989	-0.983234	-0.982185	0	0.000714	0.002213	0.025043	0.004216	0.007455	0.001662	0.00208	0.121773	0.06532	0.039888	0.029811	0.008106	0.021984	0.025248
>gi|16129011|ref|NP_415566.1| osmoregulated periplasmic glucan (OPG) biosynthesis periplasmic protein [Escherichia coli str. K-12 substr. MG1655]	-0.082997	-0.999478	-0.998349	-0.987904	-0.998244	-0.993525	-0.998943	-0.998231	-0.798423	-0.912916	-0.957669	-0.974344	-0.991989	-0.983234	-0.982185	0	0.000714	0.002213	0.025043	0.004216	0.007455	0.001662	0.00208	0.121773	0.06532	0.039888	0.029811	0.008106	0.021984	0.025248
>gi|16129012|ref|NP_415567.1| membrane glycosyltransferase [Escherichia coli str. K-12 substr. MG1655]	-0.943499	-0.999923	-0.999009	-0.990079	-0.999171	-0.996079	-0.999541	-0.998316	-0.493708	-0.81206	-0.879739	-0.921732	-0.981547	-0.968884	-0.965775	0	9.6e-05	0.001104	0.028677	0.001879	0.005323	0.000611	0.002207	0.263738	0.125365	0.114522	0.07185	0.017511	0.035388	0.048391
>gi|16129013|ref|NP_415568.1| lipoprotein, DUF1375 family [Escherichia coli str. K-12 substr. MG1655]	-0.063649	-0.999999	-0.999989	-0.999351	-0.99979	-0.999905	-0.999995	-0.999816	0.353172	0.085981	-0.432277	-0.391125	-0.658419	-0.803139	-0.849498	0	1e-06	2.1e-05	0.001893	0.000649	0.000171	1.4e-05	0.000265	0.347706	0.505859	0.413398	0.484958	0.510654	0.339774	0.17709
>gi|90111208|ref|NP_415569.4| multicopy suppressor of secY and secA [Escherichia coli str. K-12 substr. MG1655]	-0.507956	-0.99658	-0.843669	-0.903982	-0.940448	-0.992616	-0.999993	-0.961945	0.344742	0.017308	-0.37017	-0.197998	-0.588325	-0.46959	-0.392916	0	0.009957	0.488684	0.187055	0.182964	0.010244	1.5e-05	0.053654	0.484824	0.743545	0.625075	0.648855	0.464148	0.527941	0.681777
>gi|16129016|ref|NP_415571.1| predicted drug efflux system [Escherichia coli str. K-12 substr. MG1655]	-0.272071	-0.999795	-0.992802	-0.993945	-0.998956	-0.979656	-0.999786	-0.998751	-0.125529	-0.724363	-0.753015	-0.888539	-0.897018	-0.934237	-0.93954	0	0.000431	0.018721	0.010347	0.002865	0.049801	0.000314	0.001617	0.398722	0.214681	0.160074	0.084678	0.134665	0.082624	0.048845
>gi|16129017|ref|NP_415572.1| lauryl-acyl carrier protein (ACP)-dependent acyltransferase [Escherichia coli str. K-12 substr. MG1655]	-0.912776	-0.999795	-0.992802	-0.993945	-0.998956	-0.979656	-0.999786	-0.998751	-0.125529	-0.724363	-0.753015	-0.888539	-0.897018	-0.934237	-0.93954	0	0.000431	0.018721	0.010347	0.002865	0.049801	0.000314	0.001617	0.398722	0.214681	0.160074	0.084678	0.134665	0.082624	0.048845
>gi|16129018|ref|NP_415573.1| predicted rhodanese-related sulfurtransferase [Escherichia coli str. K-12 substr. MG1655]	-0.984235	-0.999061	-0.999053	-0.994035	-0.997602	-0.997529	-0.999699	-0.997564	-0.921136	-0.944906	-0.965207	-0.982484	-0.973501	-0.969269	-0.988822	0	0.001521	0.001109	0.007192	0.007098	0.002803	0.00039	0.004628	0.083847	0.047379	0.03441	0.019295	0.029102	0.02489	0.015532
>gi|16129019|ref|NP_415574.1| secreted protein [Escherichia coli str. K-12 substr. MG1655]	0.255381	0.291714	-0.260943	-0.329503	-0.593388	-0.744443	-0.914752	-0.944167	0.005505	-0.184491	-0.176455	-0.281219	-0.607374	-0.376321	-0.444225	0	0.502012	0.421555	0.443689	0.346095	0.148182	0.083611	0.050499	0.317955	0.27749	0.28389	0.287675	0.128128	0.274152	0.198271
>gi|16129020|ref|NP_415575.1| predicted cytochrome b561 [Escherichia coli str. K-12 substr. MG1655]	-0.999892	-0.999999	-0.999995	-0.996587	-0.999936	-0.99979	-0.999995	-0.999892	-0.561321	-0.733236	-0.828276	-0.896375	-0.949964	-0.941445	-0.959169	0	2e-06	6e-06	0.010702	0.000196	0.000552	8e-06	0.000156	0.374424	0.150454	0.119548	0.099326	0.059565	0.079368	0.064662
>gi|16129021|ref|NP_415576.1| predicted protein [Escherichia coli str. K-12 substr. MG1655]	-0.947924	-0.999402	-0.931579	-0.978943	-0.978013	-0.975609	-0.999039	-0.946276	-0.837065	-0.93751	-0.847106	-0.970711	-0.982357	-0.975104	-0.962138	0	0.001127	0.147951	0.04803	0.055952	0.049241	0.002151	0.096329	0.150553	0.132057	0.280626	0.067604	0.020089	0.031794	0.060226
>gi|16129022|ref|NP_415577.1| N-methyltryptophan oxidase, FAD-binding [Escherichia coli str. K-12 substr. MG1655]	-0.954317	-0.994941	-0.996986	-0.985501	-0.995193	-0.995883	-0.999249	-0.998184	-0.519626	-0.662445	-0.792984	-0.816331	-0.902473	-0.898609	-0.881259	0	0.00519	0.004289	0.023605	0.008758	0.00369	0.000783	0.002419	0.135368	0.170128	0.100851	0.080686	0.040795	0.058059	0.051692
>gi|49176074|ref|NP_415578.3| biofilm regulator [Escherichia coli str. K-12 substr. MG1655]	0.392313	-0.983661	-0.986385	-0.940671	-0.977454	-0.990633	-0.998723	-0.985689	0.290069	0.010765	-0.239323	-0.486567	-0.702781	-0.86266	-0.805964	0	0.032505	0.017097	0.162301	0.0522	0.006342	0.00159	0.018511	0.366942	0.425974	0.379734	0.295554	0.25247	0.066432	0.102175
>gi|16129024|ref|NP_415579.1| DNA damage-inducible protein I [Escherichia coli str. K-12 substr. MG1655]	0.931146	-0.854063	-0.895923	-0.913138	-0.914955	-0.959088	-0.994467	-0.983564	-0.195037	-0.484338	-0.311943	-0.59656	-0.864471	-0.878251	-0.785819	0	0.109387	0.092871	0.130271	0.1614	0.030269	0.006649	0.025509	0.259901	0.320773	0.626485	0.328149	0.144486	0.110873	0.265212
>gi|16129025|ref|NP_415580.1| dihydro-orotase [Escherichia coli str. K-12 substr. MG1655]	-0.560865	-0.977387	-0.95982	-0.942923	-0.984855	-0.971752	-0.991252	-0.988708	-0.755044	-0.809022	-0.883179	-0.933953	-0.952539	-0.952992	-0.980617	0	0.038729	0.041609	0.070996	0.024824	0.020481	0.010224	0.010049	0.227871	0.114349	0.098324	0.067279	0.049724	0.036521	0.021949
>gi|16129026|ref|NP_415581.1| lipoprotein, DUF1439 family [Escherichia coli str. K-12 substr. MG1655]	-0.251179	0.498103	0.5354	0.514036	0.405055	0.328261	-0.32608	-0.496403	-0.599332	-0.736064	-0.87379	-0.909725	-0.948853	-0.913439	-0.965771	0	0.593969	0.380455	0.364588	0.425343	0.270084	0.485329	0.39868	0.189875	0.173958	0.121976	0.039477	0.042744	0.056371	0.027155
>gi|16129027|ref|NP_415582.1| glutaredoxin 2 (Grx2) [Escherichia coli str. K-12 substr. MG1655]	-0.381429	0.498103	0.5354	0.514036	0.405055	0.328261	-0.32608	-0.496403	-0.599332	-0.736064	-0.87379	-0.909725	-0.948853	-0.913439	-0.965771	0	0.593969	0.380455	0.364588	0.425343	0.270084	0.485329	0.39868	0.189875	0.173958	0.121976	0.039477	0.042744	0.056371	0.027155
>gi|90111209|ref|NP_415583.4| multidrug resistance efflux transporter conferring overexpression resistance to norfloxacin and enoxacin [Escherichia coli str. K-12 substr. MG1655]	-0.997947	-0.999988	-0.998928	-0.990864	-0.999228	-0.993284	-0.999533	-0.997758	-0.163458	-0.746713	-0.824807	-0.922081	-0.946631	-0.953606	-0.954253	0	1.8e-05	0.001874	0.023575	0.002295	0.01586	0.000783	0.003691	0.4688	0.140328	0.176104	0.084745	0.108919	0.043692	0.045722
>gi|16129029|ref|NP_415584.1| ribosomal-protein-S5-alanine N-acetyltransferase [Escherichia coli str. K-12 substr. MG1655]	-0.978573	-0.999941	-0.999801	-0.996395	-0.999378	-0.999224	-0.999871	-0.999267	-0.868249	-0.939678	-0.976879	-0.984575	-0.992706	-0.993887	-0.988286	0	0.000108	0.000275	0.010144	0.001857	0.001088	0.000178	0.001031	0.101094	0.05542	0.032745	0.01375	0.012227	0.00585	0.017676
>gi|16129030|ref|NP_415585.1| conserved protein, UPF0502 family [Escherichia coli str. K-12 substr. MG1655]	-0.361157	-0.392503	-0.048712	-0.103636	-0.604018	-0.314202	-0.6966	-0.677472	-0.465942	-0.64161	-0.655339	-0.758915	-0.795342	-0.685176	-0.860568	0	0.468279	0.661781	0.349509	0.392723	0.27694	0.232983	0.256289	0.286677	0.191637	0.23005	0.18495	0.100087	0.176239	0.120618
>gi|16129031|ref|NP_415586.1| predicted oxidoreductase with NAD(P)-binding Rossmann-fold domain [Escherichia coli str. K-12 substr. MG1655]	-0.800735	-0.392503	-0.048712	-0.103636	-0.604018	-0.314202	-0.6966	-0.677472	-0.465942	-0.64161	-0.655339	-0.758915	-0.795342	-0.685176	-0.860568	0	0.468279	0.661781	0.349509	0.392723	0.27694	0.232983	0.256289	0.286677	0.191637	0.23005	0.18495	0.100087	0.176239	0.120618
>gi|16129032|ref|NP_415587.1| probable peptidoglycan lipid II flippase required for murein synthesis [Escherichia coli str. K-12 substr. MG1655]	-0.948359	-0.999682	-0.99463	-0.979271	-0.997954	-0.960738	-0.999339	-0.99687	-0.485556	-0.853141	-0.913401	-0.955334	-0.947543	-0.959392	-0.976979	0	0.00042	0.006526	0.037646	0.004559	0.080027	0.000705	0.003854	0.341991	0.121198	0.095853	0.066286	0.118535	0.055528	0.021756
>gi|16129033|ref|NP_415588.1| export chaperone for FlgK and FlgL [Escherichia coli str. K-12 substr. MG1655]	-0.626743	-0.997003	-0.9368	-0.879349	-0.971671	-0.985254	-0.998636	-0.989656	-0.429876	-0.533865	-0.945832	-0.952012	-0.902181	-0.978205	-0.975755	0	0.008659	0.164585	0.328422	0.076004	0.020255	0.001704	0.014466	0.47194	0.53044	0.034508	0.059112	0.25827	0.030394	0.037577
>gi|16129034|ref|NP_415589.1| anti-sigma factor for FliA (sigma 28) [Escherichia coli str. K-12 substr. MG1655]	-0.071643	-0.997003	-0.9368	-0.879349	-0.971671	-0.985254	-0.998636	-0.989656	-0.429876	-0.533865	-0.945832	-0.952012	-0.902181	-0.978205	-0.975755	0	0.008659	0.164585	0.328422	0.076004	0.020255	0.001704	0.014466	0.47194	0.53044	0.034508	0.059112	0.25827	0.030394	0.037577
>gi|16129035|ref|NP_415590.1| assembly protein for flagellar basal-body periplasmic P ring [Escherichia coli str. K-12 substr. MG1655]	-0.00677	-0.884963	-0.941689	-0.959708	-0.979641	-0.885698	-0.993812	-0.988217	-0.186416	-0.673543	-0.775972	-0.86724	-0.937253	-0.965441	-0.942045	0	0.306215	0.071603	0.043226	0.030307	0.11836	0.007802	0.01274	0.572579	0.383641	0.399254	0.262081	0.164486	0.069996	0.110271
>gi|16129036|ref|NP_415591.1| flagellar component of cell-proximal portion of basal-body rod [Escherichia coli str. K-12 substr. MG1655]	0.704957	0.122795	0.176942	0.474208	-0.148373	0.318572	-0.557991	-0.224731	-0.74986	-0.824348	-0.966811	-0.96536	-0.965287	-0.953379	-0.979316	0	0.645758	0.844649	0.615206	0.690618	0.759067	0.445857	0.567396	0.17001	0.203164	0.028806	0.028909	0.037503	0.074104	0.032157
>gi|16129037|ref|NP_415592.1| flagellar component of cell-proximal portion of basal-body rod [Escherichia coli str. K-12 substr. MG1655]	-0.075807	0.89093	0.608707	0.712649	0.465556	0.591408	-0.044453	0.222032	0.136714	-0.158895	-0.490941	-0.443903	-0.719049	-0.7887	-0.754923	0	0.154968	0.378753	0.194096	0.547939	0.299083	0.630406	0.461083	0.421349	0.415932	0.410576	0.32417	0.237308	0.141943	0.180979
>gi|16129038|ref|NP_415593.1| flagellar hook assembly protein [Escherichia coli str. K-12 substr. MG1655]	0.754017	-0.993133	-0.957902	-0.953114	-0.950985	-0.99097	-0.999493	-0.979015	0.935453	0.842251	0.245337	0.191929	0.012805	0.250921	-0.0116	0	0.008735	0.08672	0.102397	0.115859	0.012403	0.001034	0.027906	0.067971	0.118781	0.557842	0.439624	0.534468	0.458238	0.291396
>gi|16129039|ref|NP_415594.1| flagellar hook protein [Escherichia coli str. K-12 substr. MG1655]	0.630293	-0.499342	-0.47166	-0.400533	-0.779694	-0.687586	-0.955782	-0.833762	0.876395	0.7951	0.622727	0.662338	0.154465	0.307526	0.217053	0	0.581163	0.567898	0.593415	0.472396	0.261308	0.078547	0.150591	0.119293	0.128112	0.150384	0.231579	0.232866	0.347765	0.389574
>gi|16129040|ref|NP_415595.1| flagellar component of cell-proximal portion of basal-body rod [Escherichia coli str. K-12 substr. MG1655]	0.614113	-0.274169	-0.456283	-0.406948	-0.620692	-0.632563	-0.958288	-0.835411	0.221267	-0.008619	-0.586963	-0.615488	-0.742556	-0.759003	-0.79774	0	0.617987	0.567707	0.434964	0.459896	0.295113	0.054051	0.130726	0.413824	0.341209	0.248439	0.210562	0.162438	0.213755	0.137281
>gi|16129041|ref|NP_415596.1| flagellar component of cell-distal portion of basal-body rod [Escherichia coli str. K-12 substr. MG1655]	0.015466	-0.484603	-0.473451	-0.446362	-0.727483	-0.488568	-0.93668	-0.775795	0.562164	0.367493	-0.284543	0.133579	-0.453087	-0.428097	-0.263415	0	0.493604	0.719079	0.52172	0.486499	0.45465	0.096803	0.215998	0.391081	0.423618	0.220459	0.277965	0.201291	0.209356	0.432097
>gi|16129042|ref|NP_415597.1| flagellar protein of basal-body outer-membrane L ring [Escherichia coli str. K-12 substr. MG1655]	0.946545	-0.945009	-0.955192	-0.953514	-0.988066	-0.952839	-0.997875	-0.989579	0.502759	0.102773	-0.172146	-0.255685	-0.675965	-0.82101	-0.587281	0	0.106028	0.043504	0.052852	0.019589	0.047798	0.002558	0.01246	0.266454	0.384297	0.606236	0.532548	0.379704	0.15841	0.421688
>gi|49176076|ref|NP_415598.3| predicted flagellar basal body protein [Escherichia coli str. K-12 substr. MG1655]	0.453524	-0.981807	-0.866657	-0.924951	-0.938662	-0.862845	-0.995775	-0.961966	0.392158	-0.107955	-0.655597	-0.384304	-0.878581	-0.881246	-0.801228	0	0.027995	0.272939	0.081755	0.119353	0.103868	0.00561	0.0437	0.405341	0.612763	0.35638	0.572997	0.154446	0.151697	0.171053
>gi|16129044|ref|NP_415599.1| muramidase [Escherichia coli str. K-12 substr. MG1655]	0.661044	-0.848354	-0.691608	-0.775489	-0.918776	-0.870904	-0.980823	-0.949389	-0.683199	-0.826458	-0.950163	-0.938164	-0.989015	-0.982031	-0.983542	0	0.375	0.408434	0.301758	0.167475	0.097799	0.029626	0.051006	0.229999	0.114381	0.062531	0.071004	0.010194	0.018597	0.024501
>gi|16129045|ref|NP_415600.1| flagellar hook-filament junction protein 1 [Escherichia coli str. K-12 substr. MG1655]	0.477336	-0.070099	-0.132476	-0.145417	-0.699482	-0.393929	-0.867015	-0.776273	0.574038	0.171598	-0.148668	0.073947	-0.422629	-0.550494	-0.506129	0	0.755855	0.755735	0.613165	0.532291	0.461124	0.159918	0.154838	0.255096	0.422686	0.418517	0.364159	0.227212	0.181438	0.286936
>gi|16129046|ref|NP_415601.1| flagellar hook-filament junction protein [Escherichia coli str. K-12 substr. MG1655]	0.867333	0.059068	-0.135257	0.124179	-0.573821	-0.375241	-0.796952	-0.760245	0.386074	0.087658	-0.378987	-0.14845	-0.564366	-0.484781	-0.61281	0	0.759389	0.693667	0.488704	0.526671	0.417694	0.168008	0.163888	0.262325	0.457988	0.301554	0.458933	0.169072	0.238766	0.325739
[truncated: 3,133 more rows]

## Sheet: COL
Annotation	Structural	MCP 1:1	MCP 2:1	MCP 3:1	MCP 4:1	MCP 7:1	MCP Lambda:1	MCP Lambda2:1	Tail 1:1	Tail 2:1	Tail 3:1	Tail 4:1	Tail 7:1	Tail Lambda:1	Tail Lambda2:1	SDS	SD MCP 1:1	SD MCP 2:1	SD MCP 3:1	SD MCP 4:1	SD MCP 7:1	SD MCP Lambda:1	SD MCP Lambda2:1	SD Tail 1:1	SD Tail 2:1	SD Tail,3:1	SD Tail 4:1	SD Tail 7:1	SD Tail Lambda:1	SD Tail Lambda2:1
[truncated: 2,615 more rows]

[truncated: 17 more sheets: LT2, ALL Prophage Annotations, Structural ANN+, Struct. ANN+ Prophage, Str.ANN+ Prophage Capsid Tail , MCP1to1 ANN+ , MCP22to1 ANN+, MCP1to1 ANN+ Prophage, MCP22to1 ANN+ Prophage, MCP1to1 ANN+ Prophage Capsid, MCP22to1 ANN+ Prophage Capsid, Tail1to1 ANN+ ALL, Tail6.6to1 ANN+ ALL, Tail1to1 ANN+ Prophage, Tail6.6to1 ANN+ Prophage, Tail1to1 ANN+Prophage Tail, Tail6.6to1 ANN+ Prophage Tail]
