# Supplementary material for: Artificial Neural Networks Trained to Detect Viral and Phage Structural Proteins
Source: PLoS Comput Biol. 2012 Aug 23;8(8):e1002657. doi: 10.1371/journal.pcbi.1002657 (PMC3426561; doi:10.1371/journal.pcbi.1002657)
Supplement: Dataset S4 — Major capsid and non-capsid protein sequences used in training. (XLS) [file pcbi.1002657.s004.xls]

## Sheet: positive_MCPs_in_training_set
>gi|110804052|ref|YP_699941.1| phage major capsid protein, HK97 family [Clostridium phage phiSM101]
>gi|145708082|ref|YP_001165257.1| P2 family phage major capsid protein [Ralstonia phage phiRSA1]
>gi|115334630|ref|YP_764476.1| phage major capsid protein [Geobacillus phage GBSV1]
>gi|134288740|ref|YP_001111033.1| gp2, phage major capsid protein, P2 family [Burkholderia phage phiE202]
>gi|134288735|ref|YP_001111152.1| gp2, phage major capsid protein, P2 family [Burkholderia phage phiE12-2]
>gi|72537718|ref|YP_293748.1| P2 family phage major capsid protein [Burkholderia phage phi52237]
>gi|89885994|ref|YP_516191.1| phage major head protein [Sodalis phage phiSG1]
>gi|207857383|ref|YP_002244034.1| phage major capsid protein [Salmonella enterica subsp. enterica serovar Enteritidis str. P125109]
>gi|126461053|ref|YP_001042167.1| HK97 family phage major capsid protein [Rhodobacter sphaeroides ATCC 17029]
>gi|219667513|ref|YP_002457948.1| phage major capsid protein, HK97 family [Desulfitobacterium hafniense DCB-2]
>gi|167647448|ref|YP_001685111.1| HK97 family phage major capsid protein [Caulobacter sp. K31]
>gi|119385623|ref|YP_916678.1| HK97 family phage major capsid protein [Paracoccus denitrificans PD1222]
>gi|114319956|ref|YP_741639.1| HK97 family phage major capsid protein [Alkalilimnicola ehrlichii MLHE-1]
>gi|114319805|ref|YP_741488.1| HK97 family phage major capsid protein [Alkalilimnicola ehrlichii MLHE-1]
>gi|120599695|ref|YP_964269.1| P2 family phage major capsid protein [Shewanella sp. W3-18-1]
>gi|120599283|ref|YP_963857.1| HK97 family phage major capsid protein [Shewanella sp. W3-18-1]
>gi|220921987|ref|YP_002497288.1| phage major capsid protein, HK97 family [Methylobacterium nodulans ORS 2060]
>gi|148544338|ref|YP_001271708.1| HK97 family phage major capsid protein [Lactobacillus reuteri DSM 20016]
>gi|312109746|ref|YP_003988062.1| phage major capsid protein, HK97 family [Geobacillus sp. Y4.1MC1]
>gi|170718352|ref|YP_001783579.1| P2 family phage major capsid protein [Haemophilus somnus 2336]
>gi|217973755|ref|YP_002358506.1| phage major capsid protein, HK97 family [Shewanella baltica OS223]
>gi|152994620|ref|YP_001339455.1| P2 family phage major capsid protein [Marinomonas sp. MWYL1]
>gi|146308984|ref|YP_001189449.1| HK97 family phage major capsid protein [Pseudomonas mendocina ymp]
>gi|126173522|ref|YP_001049671.1| P2 family phage major capsid protein [Shewanella baltica OS155]
>gi|120603803|ref|YP_968203.1| P2 family phage major capsid protein [Desulfovibrio vulgaris subsp. vulgaris DP4]
>gi|120602515|ref|YP_966915.1| P2 family phage major capsid protein [Desulfovibrio vulgaris subsp. vulgaris DP4]
>gi|307329069|ref|ZP_07608236.1| phage major capsid protein, HK97 family [Streptomyces violaceusniger Tu 4113]
>gi|300729095|ref|ZP_07062449.1| phage major capsid protein, HK97 family [Acidobacterium sp. MP5ACTX9]
>gi|302876769|ref|YP_003845402.1| phage major capsid protein, HK97 family [Clostridium cellulovorans 743B]
>gi|302875281|ref|YP_003843914.1| phage major capsid protein, HK97 family [Clostridium cellulovorans 743B]
>gi|146277402|ref|YP_001167561.1| HK97 family phage major capsid protein [Rhodobacter sphaeroides ATCC 17025]
>gi|300024483|ref|YP_003757094.1| phage major capsid protein, HK97 family [Hyphomicrobium denitrificans ATCC 51888]
>gi|296127291|ref|YP_003634543.1| phage major capsid protein, HK97 family [Brachyspira murdochii DSM 12563]
>gi|296126727|ref|YP_003633979.1| phage major capsid protein, HK97 family [Brachyspira murdochii DSM 12563]
>gi|296126349|ref|YP_003633601.1| phage major capsid protein, HK97 family [Brachyspira murdochii DSM 12563]
>gi|296051585|ref|YP_003632259.1| phage major capsid protein, HK97 family [Planctomyces limnophilus DSM 3776]
>gi|295402311|ref|ZP_06812266.1| phage major capsid protein, HK97 family [Geobacillus thermoglucosidasius C56-YS93]
>gi|268316585|ref|YP_003290304.1| phage major capsid protein, HK97 family [Rhodothermus marinus DSM 4252]
>gi|288916283|ref|ZP_06410662.1| phage major capsid protein, HK97 family [Frankia sp. EUN1f]
>gi|256755134|ref|ZP_05495912.1| phage major capsid protein, HK97 family [Clostridium papyrosolvens DSM 2782]
>gi|169257230|ref|YP_001700607.1| bacteriophage major capsid protein; Lambda gpE homolog [Phage Gifsy-1]
>gi|300915364|ref|ZP_07132678.1| phage major capsid protein, HK97 family [Thermoanaerobacter sp. X561]
>gi|319767936|ref|YP_004133437.1| phage major capsid protein, HK97 family [Geobacillus sp. Y412MC52]
>gi|319761994|ref|YP_004125931.1| phage major capsid protein, p2 family [Alicycliphilus denitrificans BC]
>gi|317128808|ref|YP_004095090.1| phage major capsid protein, HK97 family [Bacillus cellulosilyticus DSM 2522]
>gi|317049633|ref|YP_004117281.1| phage major capsid protein, P2 family [Pantoea sp. At-9b]
>gi|125975347|ref|YP_001039257.1| phage major capsid protein, HK97 [Clostridium thermocellum ATCC 27405]
>gi|125975330|ref|YP_001039240.1| phage major capsid protein, HK97 [Clostridium thermocellum ATCC 27405]
>gi|125974486|ref|YP_001038396.1| phage major capsid protein, HK97 [Clostridium thermocellum ATCC 27405]
>gi|315497376|ref|YP_004086180.1| phage major capsid protein, hk97 family [Asticcacaulis excentricus CB 48]
>gi|170723104|ref|YP_001750792.1| HK97 family phage major capsid protein [Pseudomonas putida W619]
>gi|170720525|ref|YP_001748213.1| HK97 family phage major capsid protein [Pseudomonas putida W619]
>gi|296443884|ref|ZP_06885914.1| phage major capsid protein, HK97 family [Clostridium lentocellum DSM 5427]
>gi|307284689|ref|ZP_07564846.1| phage major capsid protein, P2 family [Escherichia coli KO11]
>gi|221065288|ref|ZP_03541393.1| phage major capsid protein, P2 family [Comamonas testosteroni KF-1]
>gi|171316541|ref|ZP_02905757.1| phage major capsid protein, P2 family [Burkholderia ambifaria MEX-5]
>gi|167039899|ref|YP_001662884.1| HK97 family phage major capsid protein [Thermoanaerobacter sp. X514]
>gi|88195867|ref|YP_500677.1| HK97 family phage major capsid protein [Staphylococcus aureus subsp. aureus NCTC 8325]
>gi|257063556|ref|YP_003143228.1| phage major capsid protein, HK97 family [Slackia heliotrinireducens DSM 20476]
>gi|256392038|ref|YP_003113602.1| phage major capsid protein, HK97 family [Catenulispora acidiphila DSM 44928]
>gi|220930321|ref|YP_002507230.1| phage major capsid protein, HK97 family [Clostridium cellulolyticum H10]
>gi|218529576|ref|YP_002420392.1| phage major capsid protein, HK97 family [Methylobacterium chloromethanicum CM4]
>gi|217978332|ref|YP_002362479.1| phage major capsid protein, HK97 family [Methylocella silvestris BL2]
>gi|170751347|ref|YP_001757607.1| HK97 family phage major capsid protein [Methylobacterium radiotolerans JCM 2831]
>gi|170731560|ref|YP_001763507.1| P2 family phage major capsid protein [Burkholderia cenocepacia MC0-3]
>gi|167623255|ref|YP_001673549.1| P2 family phage major capsid protein [Shewanella halifaxensis HAW-EB4]
>gi|161521373|ref|YP_001584800.1| P2 family phage major capsid protein [Burkholderia multivorans ATCC 17616]
>gi|307724777|ref|YP_003904528.1| phage major capsid protein, HK97 family [Thermoanaerobacter sp. X513]
>gi|307317575|ref|ZP_07597014.1| phage major capsid protein, HK97 family [Sinorhizobium meliloti AK83]
>gi|307315554|ref|ZP_07595101.1| phage major capsid protein, P2 family [Escherichia coli W]
>gi|307315532|ref|ZP_07595081.1| phage major capsid protein, P2 family [Escherichia coli W]
>gi|303239124|ref|ZP_07325654.1| phage major capsid protein, HK97 family [Acetivibrio cellulolyticus CD2]
>gi|302873683|ref|YP_003842316.1| phage major capsid protein, HK97 family [Clostridium cellulovorans 743B]
>gi|300022635|ref|YP_003755246.1| phage major capsid protein, HK97 family [Hyphomicrobium denitrificans ATCC 51888]
>gi|298290716|ref|YP_003692655.1| phage major capsid protein, HK97 family [Starkeya novella DSM 506]
>gi|295399613|ref|ZP_06809595.1| phage major capsid protein, HK97 family [Geobacillus thermoglucosidasius C56-YS93]
>gi|261418105|ref|YP_003251787.1| phage major capsid protein, HK97 family [Geobacillus sp. Y412MC61]
>gi|220903522|ref|YP_002478834.1| phage major capsid protein, P2 family [Desulfovibrio desulfuricans subsp. desulfuricans str. ATCC 27774]
>gi|281416391|ref|YP_003347415.1| major capsid protein [Streptococcus phage Abc2]
>gi|282884226|ref|ZP_06292814.1| phage major capsid protein, P2 family [Burkholderia sp. CCGE1001]
>gi|156564106|ref|YP_001429616.1| major head protein [Bacillus phage 0305phi8-36]
>gi|77020198|ref|YP_338137.1| major capsid protein, HK97 family [Bacillus phage Cherry]
>gi|9632943|ref|NP_049971.1| major head protein [Streptococcus phage Sfi21]
>gi|31072024|ref|NP_852022.1| major capsid protein [Streptococcus phage C1]
>gi|77020144|ref|YP_338188.1| major capsid protein, HK97 family [Bacillus phage Gamma]
>gi|301324879|ref|ZP_07218450.1| phage major capsid protein, HK97 family [Escherichia coli MS 78-1]
>gi|297208836|ref|ZP_06925248.1| HK97 family phage major capsid protein [Staphylococcus aureus subsp. aureus ATCC 51811]
>gi|168236910|ref|ZP_02661968.1| phage major capsid protein, HK97 family protein [Salmonella enterica subsp. enterica serovar Schwarzengrund str. SL480]
>gi|257469575|ref|ZP_05633667.1| HK97 family phage major capsid protein [Fusobacterium ulcerans ATCC 49185]
>gi|317063813|ref|ZP_07928298.1| phage major capsid protein [Fusobacterium ulcerans ATCC 49185]
>gi|253689542|ref|YP_003018732.1| phage major capsid protein, P2 family [Pectobacterium carotovorum subsp. carotovorum PC1]
>gi|148284393|ref|YP_001248483.1| phage major capsid protein, HK97 [Orientia tsutsugamushi str. Boryong]
>gi|49187967|ref|YP_031220.1| HK97 family phage major capsid protein [Bacillus anthracis str. Sterne]
>gi|315612405|ref|ZP_07887318.1| HK97 family phage major capsid protein [Streptococcus sanguinis ATCC 49296]
>gi|237668091|ref|ZP_04528075.1| phage major capsid protein, HK97 family [Clostridium butyricum E4 str. BoNT E BL5262]
>gi|168238830|ref|ZP_02663888.1| phage major capsid protein, HK97 family protein [Salmonella enterica subsp. enterica serovar Schwarzengrund str. SL480]
>gi|167993600|ref|ZP_02574694.1| phage major capsid protein, HK97 family [Salmonella enterica subsp. enterica serovar 4,[5],12:i:- str. CVM23701]
>gi|150396859|ref|YP_001327326.1| phage major capsid protein E [Sinorhizobium medicae WSM419]
>gi|114566988|ref|YP_754142.1| HK97 family phage major capsid protein [Syntrophomonas wolfei subsp. wolfei str. Goettingen]
>gi|92115964|ref|YP_575693.1| phage major capsid protein, HK97 [Nitrobacter hamburgensis X14]
>gi|88606937|ref|YP_505438.1| HK97 family phage major capsid protein [Anaplasma phagocytophilum HZ]
>gi|87201134|ref|YP_498391.1| phage major capsid protein, HK97 [Novosphingobium aromaticivorans DSM 12444]
>gi|281491947|ref|YP_003353927.1| phage major head protein [Lactococcus lactis subsp. lactis KF147]
>gi|301020139|ref|ZP_07184267.1| phage major capsid protein, HK97 family [Escherichia coli MS 69-1]
>gi|198242419|ref|YP_002216028.1| phage major capsid protein, HK97 family [Salmonella enterica subsp. enterica serovar Dublin str. CT_02021853]
>gi|194736054|ref|YP_002115125.1| phage major capsid protein, HK97 family protein [Salmonella enterica subsp. enterica serovar Schwarzengrund str. CVM19633]
>gi|194735635|ref|YP_002117152.1| phage major capsid protein, HK97 family protein [Salmonella enterica subsp. enterica serovar Schwarzengrund str. CVM19633]
>gi|191169071|ref|ZP_03030833.1| phage major capsid protein, HK97 family [Escherichia coli B7A]
>gi|191168337|ref|ZP_03030129.1| phage major capsid protein, HK97 family [Escherichia coli B7A]
>gi|168790439|ref|ZP_02815446.1| phage major capsid protein, HK97 family [Escherichia coli O157:H7 str. EC869]
>gi|93007444|ref|YP_579208.1| major capsid protein [Streptomyces phage mu1/6]
>gi|310828688|ref|YP_003961045.1| phage major capsid protein [Eubacterium limosum KIST612]
>gi|308180861|ref|YP_003924989.1| HK97 family phage major capsid protein [Lactobacillus plantarum subsp. plantarum ST-III]
>gi|313898138|ref|ZP_07831677.1| phage major capsid protein, HK97 family [Clostridium sp. HGF2]
>gi|313891857|ref|ZP_07825462.1| phage major capsid protein, HK97 family [Dialister microaerophilus UPII 345-E]
>gi|168214694|ref|ZP_02640319.1| phage major capsid protein, HK97 family [Clostridium perfringens CPE str. F4969]
>gi|168206536|ref|ZP_02632541.1| phage major capsid protein, HK97 family [Clostridium perfringens E str. JGS1987]
>gi|304439218|ref|ZP_07399136.1| HK97 family phage major capsid protein [Peptoniphilus duerdenii ATCC BAA-1640]
>gi|282933185|ref|ZP_06338572.1| phage major capsid protein, HK97 family [Lactobacillus jensenii 208-1]
>gi|126461413|ref|YP_001042527.1| phage major head protein [Rhodobacter sphaeroides ATCC 17029]
>gi|312984200|ref|ZP_07791546.1| phage major capsid protein, HK97 family [Lactobacillus crispatus CTV-05]
>gi|312898088|ref|ZP_07757486.1| phage major capsid protein, HK97 family [Megasphaera micronuciformis F0359]
>gi|312873814|ref|ZP_07733858.1| phage major capsid protein, HK97 family [Lactobacillus iners LEAF 2052A-d]
>gi|300766685|ref|ZP_07076602.1| HK97 family phage major capsid protein [Lactobacillus plantarum subsp. plantarum ATCC 14917]
>gi|307314497|ref|ZP_07594100.1| phage major capsid protein, P2 family [Escherichia coli W]
>gi|300912946|ref|ZP_07130384.1| HK97 family phage major capsid protein [Staphylococcus aureus subsp. aureus TCH70]
>gi|282926105|ref|ZP_06333750.1| phage major capsid protein [Staphylococcus aureus A9765]
>gi|194438127|ref|ZP_03070220.1| phage major capsid protein, HK97 family [Escherichia coli 101-1]
>gi|193064315|ref|ZP_03045397.1| phage major capsid protein, HK97 family [Escherichia coli E22]
>gi|148267496|ref|YP_001246439.1| phage major capsid protein, HK97 [Staphylococcus aureus subsp. aureus JH9]
>gi|194017339|ref|ZP_03055951.1| phage major capsid protein, HK97 family [Bacillus pumilus ATCC 7061]
>gi|177652938|ref|ZP_02935265.1| phage major capsid protein, HK97 family [Bacillus anthracis str. A0174]
>gi|170707760|ref|ZP_02898211.1| phage major capsid protein, HK97 family [Bacillus anthracis str. A0389]
>gi|167641986|ref|ZP_02400219.1| phage major capsid protein, HK97 family [Bacillus anthracis str. A0193]
>gi|165869901|ref|ZP_02214558.1| phage major capsid protein, HK97 family [Bacillus anthracis str. A0488]
>gi|190567796|ref|ZP_03020708.1| phage major capsid protein, HK97 family [Bacillus anthracis Tsiankovskii-I]
>gi|182418898|ref|ZP_02950155.1| phage major capsid protein, HK97 family [Clostridium butyricum 5521]
>gi|212638509|ref|YP_002315029.1| phage major capsid protein [Anoxybacillus flavithermus WK1]
>gi|298379832|ref|ZP_06989437.1| phage major capsid protein [Escherichia coli FVEC1302]
>gi|294783566|ref|ZP_06748890.1| phage major capsid protein, HK97 family [Fusobacterium sp. 1_1_41FAA]
>gi|293510341|ref|ZP_06669047.1| HK97 family phage major capsid protein [Staphylococcus aureus subsp. aureus M809]
>gi|293503328|ref|ZP_06667175.1| HK97 family phage major capsid protein [Staphylococcus aureus subsp. aureus 58-424]
>gi|293433454|ref|ZP_06661882.1| HK97 family phage major capsid protein [Escherichia coli B088]
>gi|293404052|ref|ZP_06648046.1| phage major capsid protein [Escherichia coli FVEC1412]
>gi|282924542|ref|ZP_06332210.1| HK97 family phage major capsid protein [Staphylococcus aureus subsp. aureus C101]
>gi|282919804|ref|ZP_06327536.1| phage major capsid protein [Staphylococcus aureus subsp. aureus C427]
>gi|282904467|ref|ZP_06312352.1| phage major capsid protein, HK97 family [Staphylococcus aureus subsp. aureus C160]
>gi|270291370|ref|ZP_06197592.1| HK97 family phage major capsid protein [Pediococcus acidilactici 7_4]
>gi|262047940|ref|ZP_06020883.1| phage major capsid protein [Lactobacillus crispatus MV-3A-US]
>gi|262046763|ref|ZP_06019723.1| phage major capsid protein [Lactobacillus crispatus MV-3A-US]
>gi|260664068|ref|ZP_05864921.1| HK97 family phage major capsid protein [Lactobacillus jensenii SJ-7A-US]
>gi|260660790|ref|ZP_05861705.1| HK97 family phage major capsid protein [Lactobacillus jensenii 115-3-CHN]
>gi|260433005|ref|ZP_05786976.1| phage major capsid protein, HK97 family [Silicibacter lacuscaerulensis ITI-1157]
>gi|257436467|ref|ZP_05612511.1| HK97 family phage major capsid protein [Staphylococcus aureus subsp. aureus M876]
>gi|257425570|ref|ZP_05601994.1| HK97 family phage major capsid protein [Staphylococcus aureus subsp. aureus 55/2053]
>gi|256851367|ref|ZP_05556756.1| HK97 family phage major capsid protein [Lactobacillus jensenii 27-2-CHN]
>gi|256849989|ref|ZP_05555420.1| HK97 family phage major capsid protein [Lactobacillus crispatus MV-1A-US]
>gi|256847818|ref|ZP_05553263.1| HK97 family phage major capsid protein [Lactobacillus coleohominis 101-4-CHN]
>gi|254224909|ref|ZP_04918524.1| phage major capsid protein, HK97 family [Vibrio cholerae V51]
>gi|229601638|ref|YP_002869351.1| phage major capsid protein, HK97 family [Bacillus anthracis str. A0248]
>gi|227817890|ref|YP_002817899.1| phage major capsid protein, HK97 family [Bacillus anthracis str. CDC 684]
>gi|225855788|ref|YP_002737299.1| phage major capsid protein, HK97 family [Streptococcus pneumoniae P1031]
>gi|224371851|ref|YP_002606015.1| Phage major capsid protein, HK97 family [Desulfobacterium autotrophicum HRM2]
>gi|222085916|ref|YP_002544448.1| phage major capsid protein, HK97 family [Agrobacterium radiobacter K84]
>gi|218231720|ref|YP_002367333.1| phage major capsid protein, HK97 family [Bacillus cereus B4264]
>gi|209885287|ref|YP_002289144.1| phage major capsid protein, HK97 family [Oligotropha carboxidovorans OM5]
>gi|188581931|ref|YP_001925376.1| phage major capsid protein, HK97 family [Methylobacterium populi BJ001]
>gi|186472252|ref|YP_001859594.1| HK97 family phage major capsid protein [Burkholderia phymatum STM815]
>gi|184153714|ref|YP_001842055.1| phage major head protein [Lactobacillus reuteri JCM 1112]
>gi|170681147|ref|YP_001743251.1| HK97 family phage major capsid protein [Escherichia coli SMS-3-5]
>gi|170020776|ref|YP_001725730.1| P2 family phage major capsid protein [Escherichia coli ATCC 8739]
>gi|160876024|ref|YP_001555340.1| P2 family phage major capsid protein [Shewanella baltica OS195]
>gi|153940534|ref|YP_001391155.1| HK97 family phage major capsid protein [Clostridium botulinum F str. Langeland]
>gi|92117554|ref|YP_577283.1| phage major capsid protein, HK97 [Nitrobacter hamburgensis X14]
>gi|307686593|ref|ZP_07629039.1| phage major capsid protein, HK97 family [Clostridium cellulovorans 743B]
>gi|306827689|ref|ZP_07460965.1| HK97 family phage major capsid protein [Streptococcus pyogenes ATCC 10782]
>gi|301299547|ref|ZP_07205813.1| phage major capsid protein, HK97 family [Lactobacillus salivarius ACS-116-V-Col5a]
>gi|300910169|ref|ZP_07127629.1| HK97 family phage major capsid protein [Lactobacillus reuteri SD2112]
>gi|300909449|ref|ZP_07126910.1| HK97 family phage major capsid protein [Lactobacillus reuteri SD2112]
>gi|300824906|ref|ZP_07105007.1| phage major capsid protein, HK97 family [Escherichia coli MS 119-7]
>gi|146277792|ref|YP_001167951.1| phage major capsid protein, HK97 [Rhodobacter sphaeroides ATCC 17025]
>gi|300871089|ref|YP_003785961.1| phage major capsid protein-like protein [Brachyspira pilosicoli 95/1000]
>gi|99081509|ref|YP_613663.1| phage major capsid protein, HK97 [Ruegeria sp. TM1040]
>gi|226949136|ref|YP_002804227.1| phage major capsid protein, HK97 family [Clostridium botulinum A2 str. Kyoto]
>gi|269202513|ref|YP_003281782.1| phage major capsid protein, HK97 family [Staphylococcus aureus subsp. aureus ED98]
>gi|289423853|ref|ZP_06425646.1| phage major capsid protein, HK97 family [Peptostreptococcus anaerobius 653-L]
>gi|168183973|ref|ZP_02618637.1| phage major capsid protein, HK97 family [Clostridium botulinum Bf]
>gi|168182334|ref|ZP_02616998.1| phage major capsid protein, HK97 family [Clostridium botulinum Bf]
>gi|260424989|ref|ZP_05733903.2| phage major capsid protein, HK97 family [Dialister invisus DSM 15470]
>gi|227365057|ref|ZP_03849092.1| HK97 family phage major capsid protein [Lactobacillus reuteri MM2-3]
>gi|227532365|ref|ZP_03962414.1| HK97 family phage major capsid protein [Lactobacillus reuteri MM4-1A]
>gi|251780301|ref|ZP_04823221.1| phage major capsid protein, HK97 family [Clostridium botulinum E1 str. 'BoNT E Beluga']
>gi|251780159|ref|ZP_04823079.1| phage major capsid protein, HK97 family [Clostridium botulinum E1 str. 'BoNT E Beluga']
>gi|251779807|ref|ZP_04822727.1| phage major capsid protein, HK97 family [Clostridium botulinum E1 str. 'BoNT E Beluga']
>gi|229551670|ref|ZP_04440395.1| HK97 family phage major capsid protein [Lactobacillus rhamnosus LMS2-1]
>gi|115304291|ref|YP_762590.1| major capsid protein [Lactococcus phage Q54]
>gi|22296527|ref|NP_680487.1| major head protein [Lactobacillus phage A2]
>gi|227878726|ref|ZP_03996638.1| phage phi-C31 gp36 major capsid family protein [Lactobacillus crispatus JV-V01]
>gi|227544634|ref|ZP_03974683.1| phage major capsid protein [Lactobacillus reuteri CF48-3A]
>gi|227535675|ref|ZP_03965724.1| HK97 family phage major capsid protein [Lactobacillus paracasei subsp. paracasei ATCC 25302]
>gi|227522328|ref|ZP_03952377.1| phage phi-C31 gp36 major capsid family protein [Lactobacillus hilgardii ATCC 8290]
>gi|9633043|ref|NP_050151.1| major head protein [Lactobacillus phage phiadh]
>gi|9626346|ref|NP_040678.1| major coat protein [Enterobacteria phage G4 sensu lato]
>gi|196033474|ref|ZP_03100886.1| phage major capsid protein, HK97 family [Bacillus cereus W]
>gi|320156407|ref|YP_004188786.1| phage major capsid protein [Vibrio vulnificus MO6-24/O]
>gi|309795384|ref|ZP_07689802.1| phage major capsid protein, P2 family [Escherichia coli MS 145-7]
>gi|307142109|ref|ZP_07500541.1| phage major capsid protein, P2 family [Escherichia coli M605]
>gi|289628253|ref|ZP_06461207.1| HK97 family phage major capsid protein [Pseudomonas syringae pv. aesculi str. NCPPB3681]
>gi|261258444|ref|ZP_05950977.1| phage major capsid protein [Escherichia coli O157:H7 str. FRIK966]
>gi|261227820|ref|ZP_05942101.1| phage major capsid protein [Escherichia coli O157:H7 str. FRIK2000]
>gi|213970564|ref|ZP_03398691.1| phage major capsid protein, HK97 family [Pseudomonas syringae pv. tomato T1]
>gi|193066601|ref|ZP_03047639.1| phage major capsid protein E [Escherichia coli E22]
>gi|310821053|ref|YP_003953411.1| phage major capsid protein, hk97 [Stigmatella aurantiaca DW4/3-1]
>gi|168822447|ref|ZP_02834447.1| phage major capsid protein, P2 family [Salmonella enterica subsp. enterica serovar Weltevreden str. HI_N05-537]
>gi|168822410|ref|ZP_02834410.1| phage major capsid protein, P2 family [Salmonella enterica subsp. enterica serovar Weltevreden str. HI_N05-537]
>gi|168468077|ref|ZP_02701914.1| phage major capsid protein E [Salmonella enterica subsp. enterica serovar Newport str. SL317]
>gi|168467875|ref|ZP_02701712.1| phage major capsid protein E [Salmonella enterica subsp. enterica serovar Newport str. SL317]
>gi|168264537|ref|ZP_02686510.1| phage major capsid protein E [Salmonella enterica subsp. enterica serovar Hadar str. RI_05P066]
>gi|168262804|ref|ZP_02684777.1| phage major capsid protein, P2 family [Salmonella enterica subsp. enterica serovar Hadar str. RI_05P066]
>gi|319892556|ref|YP_004149431.1| Phage major capsid protein [Staphylococcus pseudintermedius HKU10-03]
>gi|58698605|ref|ZP_00373502.1| phage major capsid protein, HK97 family [Wolbachia endosymbiont of Drosophila ananassae]
>gi|314933962|ref|ZP_07841327.1| phage major capsid protein, HK97 family [Staphylococcus caprae C87]
>gi|317490976|ref|ZP_07949412.1| P2 family phage major capsid protein [Enterobacteriaceae bacterium 9_2_54FAA]
>gi|317483317|ref|ZP_07942311.1| phage major head protein [Bifidobacterium sp. 12_1_47BFAA]
>gi|317152169|ref|YP_004120217.1| phage major capsid protein, P2 family [Desulfovibrio aespoeensis Aspo-2]
>gi|260582915|ref|ZP_05850699.1| P2 family phage major capsid protein [Haemophilus influenzae NT127]
>gi|257468553|ref|ZP_05632647.1| phage major capsid protein, HK97 family [Fusobacterium ulcerans ATCC 49185]
>gi|317062811|ref|ZP_07927296.1| phage major capsid protein [Fusobacterium ulcerans ATCC 49185]
>gi|317054080|ref|YP_004118105.1| phage major capsid protein, HK97 family [Pantoea sp. At-9b]
>gi|197285841|ref|YP_002151713.1| phage major capsid protein [Proteus mirabilis HI4320]
>gi|187734000|ref|YP_001880066.1| phage major capsid protein E [Shigella boydii CDC 3083-94]
>gi|187733048|ref|YP_001879581.1| phage major capsid protein E [Shigella boydii CDC 3083-94]
>gi|187732569|ref|YP_001879923.1| phage major capsid protein E [Shigella boydii CDC 3083-94]
>gi|49186509|ref|YP_029761.1| phage major capsid protein [Bacillus anthracis str. Sterne]
>gi|309793295|ref|ZP_07687722.1| phage major capsid protein E [Escherichia coli MS 145-7]
>gi|237668152|ref|ZP_04528136.1| phage major capsid protein, HK97 family [Clostridium butyricum E4 str. BoNT E BL5262]
>gi|237667719|ref|ZP_04527703.1| phage major capsid protein, HK97 family [Clostridium butyricum E4 str. BoNT E BL5262]
>gi|237507544|ref|ZP_04520259.1| phage major capsid protein, HK97 family [Burkholderia pseudomallei MSHR346]
>gi|168821401|ref|ZP_02833401.1| phage major capsid protein E [Salmonella enterica subsp. enterica serovar Weltevreden str. HI_N05-537]
>gi|168466631|ref|ZP_02700485.1| phage major capsid protein E [Salmonella enterica subsp. enterica serovar Newport str. SL317]
>gi|88608773|ref|YP_506351.1| HK97 family phage major capsid protein [Neorickettsia sennetsu str. Miyayama]
>gi|85058700|ref|YP_454402.1| phage major head protein [Sodalis glossinidius str. 'morsitans']
>gi|281491543|ref|YP_003353523.1| phage major head protein [Lactococcus lactis subsp. lactis KF147]
>gi|307229300|ref|ZP_07515711.1| phage major capsid protein, P2 family [Escherichia coli TA206]
>gi|301046456|ref|ZP_07193611.1| phage major capsid protein E [Escherichia coli MS 185-1]
>gi|301017485|ref|ZP_07182176.1| phage major capsid protein E [Escherichia coli MS 69-1]
>gi|300992397|ref|ZP_07179895.1| phage major capsid protein E [Escherichia coli MS 200-1]
>gi|300937003|ref|ZP_07151876.1| phage major capsid protein E [Escherichia coli MS 21-1]
>gi|300902117|ref|ZP_07120122.1| phage major capsid protein E [Escherichia coli MS 84-1]
>gi|300895930|ref|ZP_07114501.1| phage major capsid protein E [Escherichia coli MS 198-1]
>gi|300825094|ref|ZP_07105188.1| phage major capsid protein E [Escherichia coli MS 119-7]
>gi|198245755|ref|YP_002216724.1| phage major capsid protein, P2 family [Salmonella enterica subsp. enterica serovar Dublin str. CT_02021853]
>gi|189406304|ref|ZP_02827671.2| phage major capsid protein E [Escherichia coli O157:H7 str. EC508]
>gi|189405424|ref|ZP_02815280.2| phage major capsid protein E [Escherichia coli O157:H7 str. EC869]
>gi|307269691|ref|ZP_07551022.1| phage major capsid protein, HK97 family [Enterococcus faecalis TX4248]
>gi|300917753|ref|ZP_07134399.1| phage major capsid protein E [Escherichia coli MS 115-1]
>gi|297246659|ref|ZP_06930486.1| phage major head protein [Staphylococcus aureus A8796]
>gi|295407500|ref|ZP_06817294.1| phage major head protein [Staphylococcus aureus A8819]
>gi|290960853|ref|YP_003492035.1| phage major capsid protein [Streptomyces scabiei 87.22]
>gi|284024205|ref|ZP_06378603.1| phage major head protein [Staphylococcus aureus subsp. aureus 132]
>gi|189440017|ref|YP_001955098.1| phage major head protein [Bifidobacterium longum DJO10A]
>gi|283456324|ref|YP_003360888.1| phage major head [Bifidobacterium dentium Bd1]
>gi|307336507|ref|ZP_07612619.1| phage major capsid protein, P2 family [Escherichia coli H591]
>gi|301022962|ref|ZP_07186777.1| phage major capsid protein, P2 family [Escherichia coli MS 69-1]
>gi|300947252|ref|ZP_07161457.1| phage major capsid protein, P2 family [Escherichia coli MS 116-1]
>gi|300929058|ref|ZP_07144552.1| phage major capsid protein E [Escherichia coli MS 187-1]
>gi|300907202|ref|ZP_07124865.1| phage major capsid protein, P2 family [Escherichia coli MS 84-1]
>gi|300825252|ref|ZP_07105338.1| phage major capsid protein E [Escherichia coli MS 119-7]
>gi|197251289|ref|YP_002147652.1| phage major capsid protein, P2 family [Salmonella enterica subsp. enterica serovar Agona str. SL483]
>gi|197248447|ref|YP_002147589.1| phage major capsid protein, P2 family [Salmonella enterica subsp. enterica serovar Agona str. SL483]
>gi|194451187|ref|YP_002047234.1| phage major capsid protein, P2 family [Salmonella enterica subsp. enterica serovar Heidelberg str. SL476]
>gi|194446389|ref|YP_002041980.1| phage major capsid protein P2 family [Salmonella enterica subsp. enterica serovar Newport str. SL254]
>gi|194446211|ref|YP_002043302.1| phage major capsid protein P2 family [Salmonella enterica subsp. enterica serovar Newport str. SL254]
>gi|194445026|ref|YP_002041867.1| phage major capsid protein E [Salmonella enterica subsp. enterica serovar Newport str. SL254]
>gi|194427951|ref|ZP_03060496.1| phage major capsid protein E [Escherichia coli B171]
>gi|193063319|ref|ZP_03044409.1| phage major capsid protein E [Escherichia coli E22]
>gi|191166539|ref|ZP_03028368.1| phage major capsid protein E [Escherichia coli B7A]
>gi|189406179|ref|ZP_02826821.2| phage major capsid protein E [Escherichia coli O157:H7 str. EC508]
>gi|189405951|ref|ZP_02825428.2| phage major capsid protein E [Escherichia coli O157:H7 str. EC508]
>gi|189404480|ref|ZP_02789769.2| phage major capsid protein E [Escherichia coli O157:H7 str. EC4501]
>gi|189404173|ref|ZP_02787588.2| phage major capsid protein E [Escherichia coli O157:H7 str. EC4501]
>gi|189403566|ref|ZP_02796223.2| phage major capsid protein E [Escherichia coli O157:H7 str. EC4486]
>gi|189403521|ref|ZP_02796040.2| phage major capsid protein E [Escherichia coli O157:H7 str. EC4486]
>gi|189402310|ref|ZP_02781511.2| phage major capsid protein E [Escherichia coli O157:H7 str. EC4401]
>gi|168800464|ref|ZP_02825471.1| phage major capsid protein E [Escherichia coli O157:H7 str. EC508]
>gi|168799003|ref|ZP_02824010.1| phage major capsid protein GpN [Escherichia coli O157:H7 str. EC508]
>gi|168789872|ref|ZP_02814879.1| phage major capsid protein, P2 family [Escherichia coli O157:H7 str. EC869]
>gi|168789031|ref|ZP_02814038.1| phage major capsid protein GpN [Escherichia coli O157:H7 str. EC869]
>gi|168787640|ref|ZP_02812647.1| phage major capsid protein E [Escherichia coli O157:H7 str. EC869]
>gi|168787599|ref|ZP_02812606.1| phage major capsid protein E [Escherichia coli O157:H7 str. EC869]
>gi|168771782|ref|ZP_02796789.1| phage major capsid protein GpN [Escherichia coli O157:H7 str. EC4486]
>gi|168770992|ref|ZP_02795999.1| phage major capsid protein E [Escherichia coli O157:H7 str. EC4486]
>gi|168756329|ref|ZP_02781336.1| phage major capsid protein GpN [Escherichia coli O157:H7 str. EC4401]
>gi|167991607|ref|ZP_02572706.1| phage major capsid protein, P2 family [Salmonella enterica subsp. enterica serovar 4,[5],12:i:- str. CVM23701]
>gi|89054126|ref|YP_509577.1| phage major capsid protein, HK97 [Jannaschia sp. CCS1]
>gi|76811214|ref|YP_333085.1| HK97 family phage major capsid protein [Burkholderia pseudomallei 1710b]
>gi|168211297|ref|ZP_02636922.1| phage major capsid protein, HK97 family [Clostridium perfringens B str. ATCC 3626]
>gi|189010797|ref|ZP_02809374.2| phage major capsid protein E [Escherichia coli O157:H7 str. EC4076]
>gi|189010770|ref|ZP_02809230.2| phage major capsid protein E [Escherichia coli O157:H7 str. EC4076]
>gi|189010501|ref|ZP_02807507.2| phage major capsid protein E [Escherichia coli O157:H7 str. EC4076]
>gi|188024901|ref|ZP_02774788.2| phage major capsid protein E [Escherichia coli O157:H7 str. EC4113]
>gi|187776488|ref|ZP_02803063.2| phage major capsid protein E [Escherichia coli O157:H7 str. EC4196]
>gi|187776478|ref|ZP_02803020.2| phage major capsid protein E [Escherichia coli O157:H7 str. EC4196]
>gi|187776471|ref|ZP_02802937.2| phage major capsid protein E [Escherichia coli O157:H7 str. EC4196]
>gi|187776195|ref|ZP_02801031.2| phage major capsid protein E [Escherichia coli O157:H7 str. EC4196]
>gi|168782461|ref|ZP_02807468.1| phage major capsid protein E [Escherichia coli O157:H7 str. EC4076]
>gi|168782398|ref|ZP_02807405.1| phage major capsid protein GpN [Escherichia coli O157:H7 str. EC4076]
>gi|168776063|ref|ZP_02801070.1| phage major capsid protein E [Escherichia coli O157:H7 str. EC4196]
>gi|168775978|ref|ZP_02800985.1| phage major capsid protein GpN [Escherichia coli O157:H7 str. EC4196]
>gi|168752371|ref|ZP_02777393.1| phage major capsid protein GpN [Escherichia coli O157:H7 str. EC4113]
>gi|168749727|ref|ZP_02774749.1| phage major capsid protein E [Escherichia coli O157:H7 str. EC4113]
>gi|167916804|ref|ZP_02503895.1| phage major capsid protein, P2 family [Burkholderia pseudomallei 112]
>gi|167908447|ref|ZP_02495652.1| phage major capsid protein, P2 family [Burkholderia pseudomallei NCTC 13177]
>gi|167584286|ref|ZP_02376674.1| phage major capsid protein, P2 family [Burkholderia ubonensis Bu]
>gi|167578770|ref|ZP_02371644.1| phage major capsid protein, HK97 family [Burkholderia thailandensis TXDOH]
>gi|167566458|ref|ZP_02359374.1| phage major capsid protein, HK97 family [Burkholderia oklahomensis EO147]
>gi|300916282|ref|ZP_07133029.1| phage major capsid protein, P2 family [Escherichia coli MS 115-1]
>gi|294621669|ref|ZP_06700834.1| phage major capsid protein, HK97 family [Enterococcus faecium U0317]
>gi|194434235|ref|ZP_03066502.1| phage major capsid protein E [Shigella dysenteriae 1012]
>gi|193064849|ref|ZP_03045926.1| phage major capsid protein E [Escherichia coli E22]
>gi|313472112|ref|ZP_07812604.1| phage major capsid protein, HK97 family [Lactobacillus jensenii 1153]
>gi|301048704|ref|ZP_07195713.1| phage major capsid protein, P2 family [Escherichia coli MS 185-1]
>gi|197265107|ref|ZP_03165181.1| phage major capsid protein E [Salmonella enterica subsp. enterica serovar Saintpaul str. SARA23]
>gi|167992740|ref|ZP_02573836.1| phage major capsid protein E [Salmonella enterica subsp. enterica serovar 4,[5],12:i:- str. CVM23701]
>gi|312970942|ref|ZP_07785121.1| phage major capsid protein, P2 family [Escherichia coli 1827-70]
>gi|312969108|ref|ZP_07783315.1| phage major capsid protein, P2 family [Escherichia coli 2362-75]
>gi|312966885|ref|ZP_07781103.1| phage major capsid protein, P2 family [Escherichia coli 2362-75]
>gi|312902316|ref|ZP_07761523.1| phage major capsid protein, HK97 family [Enterococcus faecalis TX0635]
>gi|301307484|ref|ZP_07213472.1| phage major capsid protein E [Escherichia coli MS 124-1]
>gi|301306886|ref|ZP_07212933.1| phage major capsid protein E [Escherichia coli MS 124-1]
>gi|301303629|ref|ZP_07209751.1| phage major capsid protein, P2 family [Escherichia coli MS 124-1]
>gi|204929596|ref|ZP_03220670.1| phage major capsid protein, P2 family [Salmonella enterica subsp. enterica serovar Javiana str. GA_MM04042433]
>gi|300901710|ref|ZP_07119766.1| phage major capsid protein, P2 family [Escherichia coli MS 198-1]
>gi|300817073|ref|ZP_07097292.1| phage major capsid protein, P2 family [Escherichia coli MS 107-1]
>gi|297246300|ref|ZP_06930147.1| phage major capsid protein [Staphylococcus aureus A8796]
>gi|295407472|ref|ZP_06817267.1| phage major capsid protein [Staphylococcus aureus A8819]
>gi|294848477|ref|ZP_06789223.1| phage major capsid protein [Staphylococcus aureus A9754]
>gi|282929090|ref|ZP_06336671.1| phage head protein [SA bacteriophages 11, Mu50B]/Phage major capsid protein [Staphylococcus aureus A10102]
>gi|282928144|ref|ZP_06335751.1| phage major capsid protein [Staphylococcus aureus A10102]
>gi|282927350|ref|ZP_06334968.1| phage major capsid protein [Staphylococcus aureus A10102]
>gi|282921758|ref|ZP_06329475.1| phage major capsid protein [Staphylococcus aureus A9765]
>gi|282919884|ref|ZP_06327613.1| phage head protein [SA bacteriophages 11, Mu50B]/Phage major capsid protein [Staphylococcus aureus A9765]
>gi|282894695|ref|ZP_06302922.1| phage major capsid protein [Staphylococcus aureus A8117]
>gi|258424420|ref|ZP_05687300.1| phage major head protein [Staphylococcus aureus A9635]
>gi|258423044|ref|ZP_05685943.1| phage major capsid protein [Staphylococcus aureus A9635]
>gi|258421076|ref|ZP_05684007.1| phage major capsid protein [Staphylococcus aureus A9719]
>gi|208822392|ref|ZP_03262711.1| phage major capsid protein E [Escherichia coli O157:H7 str. EC4042]
>gi|208822100|ref|ZP_03262419.1| phage major capsid protein E [Escherichia coli O157:H7 str. EC4042]
>gi|208820304|ref|ZP_03260624.1| phage major capsid protein E [Escherichia coli O157:H7 str. EC4042]
>gi|208818574|ref|ZP_03258894.1| phage major capsid protein GpN [Escherichia coli O157:H7 str. EC4042]
>gi|208811031|ref|ZP_03252864.1| phage major capsid protein E [Escherichia coli O157:H7 str. EC4206]
>gi|208808711|ref|ZP_03251048.1| phage major capsid protein E [Escherichia coli O157:H7 str. EC4206]
>gi|208808496|ref|ZP_03250833.1| phage major capsid protein E [Escherichia coli O157:H7 str. EC4206]
>gi|208808403|ref|ZP_03250740.1| phage major capsid protein GpN [Escherichia coli O157:H7 str. EC4206]
>gi|194439351|ref|ZP_03071429.1| phage major capsid protein, P2 family [Escherichia coli 101-1]
>gi|194436200|ref|ZP_03068302.1| phage major capsid protein, P2 family [Escherichia coli 101-1]
>gi|194432901|ref|ZP_03065185.1| phage major capsid protein, P2 family [Shigella dysenteriae 1012]
>gi|193068278|ref|ZP_03049242.1| phage major capsid protein, P2 family [Escherichia coli E110019]
>gi|193067567|ref|ZP_03048534.1| phage major capsid protein E [Escherichia coli E110019]
>gi|193066893|ref|ZP_03047862.1| phage major capsid protein E [Escherichia coli E110019]
>gi|193065577|ref|ZP_03046644.1| phage major capsid protein E [Escherichia coli E22]
>gi|193065261|ref|ZP_03046333.1| phage major capsid protein, P2 family [Escherichia coli E22]
>gi|193062531|ref|ZP_03043625.1| phage major capsid protein E [Escherichia coli E22]
>gi|191173064|ref|ZP_03034597.1| phage major capsid protein E [Escherichia coli F11]
>gi|191168719|ref|ZP_03030497.1| phage major capsid protein, P2 family [Escherichia coli B7A]
>gi|208815617|ref|ZP_03256796.1| phage major capsid protein E [Escherichia coli O157:H7 str. EC4045]
>gi|208815276|ref|ZP_03256455.1| phage major capsid protein E [Escherichia coli O157:H7 str. EC4045]
>gi|208814774|ref|ZP_03255953.1| phage major capsid protein E [Escherichia coli O157:H7 str. EC4045]
>gi|208813828|ref|ZP_03255157.1| phage major capsid protein GpN [Escherichia coli O157:H7 str. EC4045]
>gi|193062854|ref|ZP_03043947.1| phage major capsid protein, P2 family [Escherichia coli E22]
>gi|300918444|ref|ZP_07135042.1| phage major capsid protein E [Escherichia coli MS 115-1]
>gi|221214650|ref|ZP_03587620.1| phage major capsid protein, P2 family [Burkholderia multivorans CGD1]
>gi|217329778|ref|ZP_03445855.1| phage major capsid protein E [Escherichia coli O157:H7 str. TW14588]
>gi|217328299|ref|ZP_03444381.1| phage major capsid protein E [Escherichia coli O157:H7 str. TW14588]
>gi|200390553|ref|ZP_03217164.1| phage major capsid protein E [Salmonella enterica subsp. enterica serovar Virchow str. SL491]
>gi|200389060|ref|ZP_03215672.1| phage major capsid protein, P2 family [Salmonella enterica subsp. enterica serovar Virchow str. SL491]
>gi|200387696|ref|ZP_03214308.1| phage major capsid protein, P2 family [Salmonella enterica subsp. enterica serovar Virchow str. SL491]
>gi|170770153|ref|ZP_02904606.1| phage major capsid protein E [Escherichia albertii TW07627]
>gi|170770010|ref|ZP_02904463.1| phage major capsid protein E [Escherichia albertii TW07627]
>gi|170769324|ref|ZP_02903777.1| phage major capsid protein, P2 family [Escherichia albertii TW07627]
>gi|170769174|ref|ZP_02903627.1| phage major capsid protein GpN [Escherichia albertii TW07627]
>gi|170769062|ref|ZP_02903515.1| phage major capsid protein E [Escherichia albertii TW07627]
>gi|88858955|ref|ZP_01133596.1| phage major capsid protein, P2 family protein [Pseudoalteromonas tunicata D2]
>gi|193070030|ref|ZP_03050977.1| phage major capsid protein E [Escherichia coli E110019]
>gi|188495286|ref|ZP_03002556.1| phage major capsid protein, P2 family [Escherichia coli 53638]
>gi|188494429|ref|ZP_03001699.1| phage major capsid protein GpN [Escherichia coli 53638]
>gi|188493890|ref|ZP_03001160.1| phage major capsid protein E [Escherichia coli 53638]
>gi|188493814|ref|ZP_03001084.1| phage major capsid protein E [Escherichia coli 53638]
>gi|188493418|ref|ZP_03000688.1| phage major capsid protein E [Escherichia coli 53638]
>gi|188492890|ref|ZP_03000160.1| phage major capsid protein E [Escherichia coli 53638]
>gi|182417857|ref|ZP_02949171.1| phage major capsid protein, HK97 family [Clostridium butyricum 5521]
>gi|163737522|ref|ZP_02144939.1| phage major capsid protein, HK97 [Phaeobacter gallaeciensis BS107]
>gi|163736652|ref|ZP_02144071.1| phage major capsid protein, HK97 [Phaeobacter gallaeciensis BS107]
>gi|153834982|ref|ZP_01987649.1| phage major capsid protein E [Vibrio harveyi HY01]
>gi|153820808|ref|ZP_01973475.1| phage major capsid protein, P2 family [Vibrio cholerae B33]
>gi|153816854|ref|ZP_01969521.1| phage major capsid protein, P2 family [Vibrio cholerae NCTC 8457]
>gi|153213660|ref|ZP_01948933.1| phage major capsid protein, P2 family [Vibrio cholerae 1587]
>gi|145639503|ref|ZP_01795107.1| phage major capsid protein, P2 family [Haemophilus influenzae PittII]
>gi|307942413|ref|ZP_07657764.1| phage major capsid protein E [Roseibium sp. TrichSKD4]
>gi|298383378|ref|ZP_06992966.1| phage major capsid protein [Escherichia coli FVEC1302]
>gi|298380318|ref|ZP_06989917.1| phage major capsid protein [Escherichia coli FVEC1302]
>gi|293510802|ref|ZP_06669503.1| phage major capsid protein [Staphylococcus aureus subsp. aureus M809]
>gi|293507839|ref|ZP_06667681.1| phage major capsid protein [Staphylococcus aureus subsp. aureus 58-424]
>gi|293433092|ref|ZP_06661520.1| P2 family phage major capsid protein [Escherichia coli B088]
>gi|293418639|ref|ZP_06661074.1| phage major capsid protein E [Escherichia coli B088]
>gi|293417395|ref|ZP_06660019.1| P2 family phage major capsid protein [Escherichia coli B185]
>gi|293414567|ref|ZP_06657216.1| phage major capsid protein E [Escherichia coli B185]
>gi|293413829|ref|ZP_06656478.1| phage major capsid protein E [Escherichia coli B185]
>gi|293410242|ref|ZP_06653818.1| P2 family phage major capsid protein [Escherichia coli B354]
>gi|293407630|ref|ZP_06651545.1| phage major capsid protein [Escherichia coli FVEC1412]
>gi|293404458|ref|ZP_06648452.1| phage major capsid protein [Escherichia coli FVEC1412]
>gi|293403706|ref|ZP_06647794.1| phage major capsid protein [Escherichia coli FVEC1412]
>gi|283771121|ref|ZP_06344012.1| phage major capsid protein [Staphylococcus aureus subsp. aureus H19]
>gi|283770984|ref|ZP_06343875.1| phage major head protein [Staphylococcus aureus subsp. aureus H19]
>gi|282925261|ref|ZP_06332919.1| phage major capsid protein [Staphylococcus aureus subsp. aureus C101]
>gi|282917311|ref|ZP_06325066.1| phage major capsid protein [Staphylococcus aureus subsp. aureus D139]
>gi|282909283|ref|ZP_06317099.1| phage major capsid protein [Staphylococcus aureus subsp. aureus WW2703/97]
>gi|260428369|ref|ZP_05782348.1| phage major capsid protein, HK97 family [Citreicella sp. SE45]
>gi|259417315|ref|ZP_05741234.1| phage major capsid protein, HK97 family [Silicibacter sp. TrichCH4B]
>gi|257437004|ref|ZP_05613045.1| phage major capsid protein [Staphylococcus aureus subsp. aureus M876]
>gi|257434096|ref|ZP_05610447.1| phage major capsid protein [Staphylococcus aureus subsp. aureus E1410]
>gi|257433219|ref|ZP_05609577.1| phage major head protein [Staphylococcus aureus subsp. aureus E1410]
>gi|254849291|ref|ZP_05238641.1| phage major capsid protein [Vibrio cholerae MO10]
>gi|254522353|ref|ZP_05134408.1| phage major capsid protein, HK97 family [Stenotrophomonas sp. SKA14]
>gi|254518473|ref|ZP_05130529.1| phage major capsid protein [Clostridium sp. 7_2_43FAA]
>gi|254449255|ref|ZP_05062703.1| phage major capsid protein, P2 family [gamma proteobacterium HTCC5015]
>gi|254286520|ref|ZP_04961477.1| phage major capsid protein, P2 family [Vibrio cholerae AM-19226]
>gi|254260231|ref|ZP_04951285.1| phage major capsid protein, HK97 family [Burkholderia pseudomallei 1710a]
>gi|254197172|ref|ZP_04903595.1| phage major capsid protein, P2 family [Burkholderia pseudomallei S13]
>gi|254196607|ref|ZP_04903031.1| phage major capsid protein, P2 family [Burkholderia pseudomallei S13]
>gi|254193199|ref|ZP_04899634.1| phage major capsid protein, P2 family [Burkholderia pseudomallei S13]
>gi|254188174|ref|ZP_04894686.1| phage major capsid protein, P2 family [Burkholderia pseudomallei Pasteur 52237]
>gi|254183936|ref|ZP_04890527.1| phage major capsid protein, P2 family [Burkholderia pseudomallei 1655]
>gi|237745792|ref|ZP_04576272.1| phage major capsid protein [Oxalobacter formigenes HOxBLS]
>gi|237738217|ref|ZP_04568698.1| phage major capsid protein E [Fusobacterium mortiferum ATCC 9817]
>gi|157160345|ref|YP_001457663.1| P2 family phage major capsid protein [Escherichia coli HS]
>gi|110799270|ref|YP_696027.1| HK97 family phage major capsid protein [Clostridium perfringens ATCC 13124]
>gi|83716068|ref|YP_439546.1| P2 family phage major capsid protein [Burkholderia thailandensis E264]
>gi|83649381|ref|YP_437816.1| P2 family phage major capsid protein [Hahella chejuensis KCTC 2396]
>gi|83643295|ref|YP_431730.1| P2 family phage major capsid protein [Hahella chejuensis KCTC 2396]
>gi|52079863|ref|YP_078654.1| phage related major head protein [Bacillus licheniformis ATCC 14580]
>gi|47529072|ref|YP_020421.1| phage major capsid protein [Bacillus anthracis str. 'Ames Ancestor']
>gi|254793893|ref|YP_003078730.1| phage major capsid protein, P2 family [Escherichia coli O157:H7 str. TW14359]
>gi|157156927|ref|YP_001463291.1| phage major capsid protein E [Escherichia coli E24377A]
>gi|300924612|ref|ZP_07140573.1| phage major capsid protein, P2 family [Escherichia coli MS 182-1]
>gi|258543081|ref|YP_003188514.1| phage major capsid protein HK97 [Acetobacter pasteurianus IFO 3283-01]
>gi|254796824|ref|YP_003081661.1| phage major capsid protein, HK97 family [Neorickettsia risticii str. Illinois]
>gi|237795139|ref|YP_002862691.1| phage major capsid protein, HK97 family [Clostridium botulinum Ba4 str. 657]
>gi|225870214|ref|YP_002746161.1| phage major capsid protein [Streptococcus equi subsp. equi 4047]
>gi|225630096|ref|YP_002726887.1| phage major capsid protein, HK97 family [Wolbachia sp. wRi]
>gi|222087392|ref|YP_002545929.1| phage major capsid protein, HK97 family [Agrobacterium radiobacter K84]
>gi|218905497|ref|YP_002453331.1| phage major capsid protein HK97 [Bacillus cereus AH820]
>gi|217961371|ref|YP_002339939.1| phage major capsid protein, HK97 family [Bacillus cereus AH187]
>gi|209919252|ref|YP_002293336.1| phage major capsid protein [Escherichia coli SE11]
>gi|209919045|ref|YP_002293129.1| phage major capsid protein [Escherichia coli SE11]
>gi|209917790|ref|YP_002291874.1| phage major capsid protein [Escherichia coli SE11]
>gi|209694355|ref|YP_002262283.1| phage major capsid protein [Aliivibrio salmonicida LFI1238]
>gi|209400938|ref|YP_002270225.1| phage major capsid protein E [Escherichia coli O157:H7 str. EC4115]
>gi|209400016|ref|YP_002271350.1| phage major capsid protein GpN [Escherichia coli O157:H7 str. EC4115]
>gi|209396940|ref|YP_002270079.1| phage major capsid protein E [Escherichia coli O157:H7 str. EC4115]
>gi|209396882|ref|YP_002270040.1| phage major capsid protein E [Escherichia coli O157:H7 str. EC4115]
>gi|188577621|ref|YP_001914550.1| phage major capsid protein, P2 family [Xanthomonas oryzae pv. oryzae PXO99A]
>gi|187935749|ref|YP_001885147.1| phage major capsid protein, HK97 family [Clostridium botulinum B str. Eklund 17B]
>gi|187933674|ref|YP_001884294.1| phage major capsid protein, HK97 family [Clostridium botulinum B str. Eklund 17B]
>gi|170680464|ref|YP_001746270.1| phage major capsid protein GpN [Escherichia coli SMS-3-5]
>gi|152989333|ref|YP_001345752.1| P2 family phage major capsid protein [Pseudomonas aeruginosa PA7]
>gi|152986467|ref|YP_001350390.1| P2 family phage major capsid protein [Pseudomonas aeruginosa PA7]
>gi|152986452|ref|YP_001346097.1| P2 family phage major capsid protein [Pseudomonas aeruginosa PA7]
>gi|151222108|ref|YP_001332930.1| phage major capsid protein [Staphylococcus aureus subsp. aureus str. Newman]
>gi|151220506|ref|YP_001331328.1| phage major head protein [Staphylococcus aureus subsp. aureus str. Newman]
>gi|148245174|ref|YP_001219867.1| major capsid phage protein [Clostridium kluyveri DSM 555]
>gi|145300713|ref|YP_001143554.1| Phage major capsid protein, P2 [Aeromonas salmonicida subsp. salmonicida A449]
>gi|145298580|ref|YP_001141421.1| P2 family phage major capsid protein [Aeromonas salmonicida subsp. salmonicida A449]
>gi|126641636|ref|YP_001084620.1| phage major capsid protein HK97 [Acinetobacter baumannii ATCC 17978]
>gi|302129836|ref|ZP_07255826.1| HK97 family phage major capsid protein [Pseudomonas syringae pv. tomato NCPPB 1108]
>gi|301381651|ref|ZP_07230069.1| HK97 family phage major capsid protein [Pseudomonas syringae pv. tomato Max13]
>gi|300909510|ref|ZP_07126971.1| HK97 family phage major capsid protein [Lactobacillus reuteri SD2112]
>gi|300936149|ref|ZP_07151087.1| phage major capsid protein E [Escherichia coli MS 21-1]
>gi|300935132|ref|ZP_07150162.1| phage major capsid protein E [Escherichia coli MS 21-1]
>gi|259908700|ref|YP_002649056.1| Phage major capsid protein, HK97 family [Erwinia pyrifoliae Ep1/96]
>gi|300714694|ref|YP_003739497.1| Major phage capsid protein [Erwinia billingiae Eb661]
>gi|294677523|ref|YP_003578138.1| HK97 family phage major capsid protein [Rhodobacter capsulatus SB 1003]
>gi|294677224|ref|YP_003577839.1| HK97 family phage major capsid protein [Rhodobacter capsulatus SB 1003]
>gi|296536844|ref|ZP_06898891.1| phage major capsid protein E [Roseomonas cervicalis ATCC 49957]
>gi|296104756|ref|YP_003614902.1| phage major capsid protein, P2 family [Enterobacter cloacae subsp. cloacae ATCC 13047]
>gi|296103193|ref|YP_003613339.1| phage major capsid protein [Enterobacter cloacae subsp. cloacae ATCC 13047]
>gi|294860198|ref|ZP_06797967.1| phage major capsid protein, HK97 family [Acinetobacter sp. 6013150]
>gi|294839796|ref|ZP_06784479.1| phage major capsid protein, HK97 family [Acinetobacter sp. 6013113]
>gi|238027336|ref|YP_002911567.1| P2 family phage major capsid protein [Burkholderia glumae BGR1]
>gi|238025821|ref|YP_002910052.1| Gp2, phage major capsid protein, P2 family protein [Burkholderia glumae BGR1]
>gi|226948758|ref|YP_002803849.1| phage major capsid protein, HK97 family [Clostridium botulinum A2 str. Kyoto]
>gi|294634586|ref|ZP_06713121.1| phage major capsid protein, P2 family [Edwardsiella tarda ATCC 23685]
>gi|294636163|ref|ZP_06714583.1| phage major capsid protein E [Edwardsiella tarda ATCC 23685]
>gi|294618900|ref|ZP_06698409.1| phage major capsid protein, HK97 family [Enterococcus faecium E1679]
>gi|147672444|ref|YP_001215891.1| P2 family phage major capsid protein [Vibrio cholerae O395]
>gi|75675817|ref|YP_318238.1| Phage major capsid protein, HK97 [Nitrobacter winogradskyi Nb-255]
>gi|75675674|ref|YP_318095.1| Phage major capsid protein, HK97 [Nitrobacter winogradskyi Nb-255]
>gi|293396798|ref|ZP_06641073.1| HK97 family phage major capsid protein [Serratia odorifera DSM 4582]
>gi|293393563|ref|ZP_06637873.1| P2 family phage major capsid protein [Serratia odorifera DSM 4582]
>gi|103487482|ref|YP_617043.1| phage major capsid protein, HK97 [Sphingopyxis alaskensis RB2256]
>gi|92113523|ref|YP_573451.1| phage major capsid protein, P2 [Chromohalobacter salexigens DSM 3043]
>gi|269203616|ref|YP_003282885.1| phage major capsid protein [Staphylococcus aureus subsp. aureus ED98]
>gi|291283171|ref|YP_003499989.1| phage major capsid protein E [Escherichia coli O55:H7 str. CB9615]
>gi|291282670|ref|YP_003499488.1| phage major capsid protein E [Escherichia coli O55:H7 str. CB9615]
>gi|291281487|ref|YP_003498305.1| phage major capsid protein E [Escherichia coli O55:H7 str. CB9615]
>gi|268589644|ref|ZP_06123865.1| phage major capsid protein, P2 family [Providencia rettgeri DSM 1131]
>gi|290475061|ref|YP_003467945.1| Phage major capsid protein, HK97 family [Xenorhabdus bovienii SS-2004]
>gi|289566716|ref|ZP_06447131.1| phage major capsid protein [Enterococcus faecium D344SRF]
>gi|261340097|ref|ZP_05967955.1| phage major capsid protein, P2 family [Enterobacter cancerogenus ATCC 35316]
>gi|257136406|ref|YP_003169680.1| major capsid protein a [Staphylococcus phage P954]
>gi|196037516|ref|ZP_03104827.1| phage major capsid protein, HK97 family [Bacillus cereus NVH0597-99]
>gi|261344186|ref|ZP_05971830.1| phage major capsid protein, P2 family [Providencia rustigianii DSM 4541]
>gi|261343776|ref|ZP_05971421.1| phage major capsid protein, P2 family [Providencia rustigianii DSM 4541]
>gi|270265269|ref|ZP_06193530.1| phage major capsid protein, HK97 family [Serratia odorifera 4Rx13]
>gi|78000028|ref|YP_358764.1| major head protein [Lactobacillus phage Lc-Nu]
>gi|168184195|ref|ZP_02618859.1| phage major capsid protein, HK97 family [Clostridium botulinum Bf]
>gi|262044704|ref|ZP_06017756.1| HK97 family phage major capsid protein [Klebsiella pneumoniae subsp. rhinoscleromatis ATCC 13884]
>gi|262042500|ref|ZP_06015658.1| P2 family phage major capsid protein [Klebsiella pneumoniae subsp. rhinoscleromatis ATCC 13884]
>gi|261492844|ref|ZP_05989391.1| phage major capsid protein, P2 family [Mannheimia haemolytica serotype A2 str. BOVINE]
>gi|260590081|ref|ZP_05855994.1| phage major capsid protein, HK97 family [Blautia hansenii DSM 20583]
>gi|258544090|ref|ZP_05704324.1| P2 family phage major capsid protein [Cardiobacterium hominis ATCC 15826]
>gi|258446375|ref|ZP_05694532.1| phage major head protein [Staphylococcus aureus A6300]
>gi|257142675|ref|ZP_05590937.1| P2 family phage major capsid protein [Burkholderia thailandensis E264]
>gi|253314578|ref|ZP_04837791.1| phage major head protein [Staphylococcus aureus subsp. aureus str. CF-Marseille]
>gi|28876178|ref|NP_795405.1| major coat protein [Streptococcus pyogenes phage 315.1]
>gi|148717889|ref|YP_001285361.1| major head protein [Staphylococcus phage 80alpha]
>gi|126011098|ref|YP_001039923.1| major coat protein [Streptococcus phage phi3396]
>gi|89152484|ref|YP_512315.1| major head protein [Bacillus phage Fah]
>gi|27476049|ref|NP_775251.1| major head protein [Pseudomonas phage PaP3]
>gi|16798789|ref|NP_463467.1| major capsid protein [Listeria phage A118]
>gi|227544320|ref|ZP_03974369.1| phage major capsid protein [Lactobacillus reuteri CF48-3A]
>gi|227534658|ref|ZP_03964707.1| phage phi-C31 gp36 major capsid family protein [Lactobacillus paracasei subsp. paracasei ATCC 25302]
>gi|9632900|ref|NP_049929.1| major head protein [Streptococcus phage Sfi19]
>gi|169936046|ref|YP_001718745.1| P2 gpN-like major capsid protein [Enterobacteria phage Fels-2]
>gi|225626393|ref|YP_002727888.1| major capsid protein [Enterococcus phage EFAP-1]
>gi|29789896|ref|NP_821152.1| major capsid protein b [Listeria phage 2389]
>gi|17488508|ref|NP_510986.1| major capsid protein a [Listeria phage 2389]
>gi|195661206|ref|YP_002117674.1| major head protein [Lactobacillus phage Lrm1]
>gi|157168379|ref|YP_001456736.1| gp6, major capsid protein [Corynebacterium phage BFK20]
>gi|90961266|ref|YP_535182.1| major head protein [Lactobacillus phage Sal2]
>gi|109289940|ref|YP_655472.1| major capsid protein N [Mannheimia phage phiMHaA1]
>gi|134288639|ref|YP_001111085.1| gp6, major capsid head protein [Burkholderia phage phi644-2]
>gi|215401212|ref|YP_002332517.1| major head protein [Staphylococcus phage phiSauS-IPLA88]
>gi|215401149|ref|YP_002332404.1| major head protein [Staphylococcus phage phiSauS-IPLA35]
>gi|20065969|ref|NP_612835.1| major capsid protein [Clostridium phage phi3626]
>gi|9632424|ref|NP_049396.1| major head protein [Streptococcus phage DT1]
>gi|157738605|ref|YP_001491543.1| major head protein [Staphylococcus phage SAP-2]
>gi|157265500|ref|YP_001468058.1| major head protein [Thermus phage P74-26]
>gi|157265383|ref|YP_001467942.1| major head protein [Thermus phage P23-45]
>gi|149882911|ref|YP_001294848.1| major capsid protein [Burkholderia phage BcepNY3]
>gi|119952248|ref|YP_950534.1| major coat protein [Enterobacteria phage N4]
>gi|29565763|ref|NP_817336.1| major head protein [Staphylococcus aureus phage P68]
>gi|12248115|ref|NP_073691.1| major head protein [Bacillus phage GA-1]
>gi|9629533|ref|NP_044821.1| major head protein [Streptococcus phage Cp-1]
>gi|122891830|ref|YP_001004375.1| major capsid protein [Staphylococcus phage phiETA3]
>gi|18496895|ref|NP_569745.1| major capsid subunit gp9 [Mycobacterium phage TM4]
>gi|319896518|ref|YP_004134711.1| phage major capsid protein [Haemophilus influenzae F3031]
>gi|319891872|ref|YP_004148747.1| Phage major capsid protein [Staphylococcus pseudintermedius HKU10-03]
>gi|167600435|ref|YP_001671935.1| major head protein [Pseudomonas phage LUZ24]
>gi|281416308|ref|YP_003347548.1| major capsid protein [Klebsiella phage KP32]
>gi|212671429|ref|YP_002308412.1| major capsid protein 10B [Kluyvera phage Kvp1]
>gi|212671413|ref|YP_002308413.1| major capsid protein 10A [Kluyvera phage Kvp1]
>gi|211956463|ref|YP_002302529.1| major capsid protein [Bacillus phage AP50]
>gi|30387487|ref|NP_848297.1| major capsid protein [Yersinia pestis phage phiA1122]
>gi|9634035|ref|NP_052109.1| major capsid protein 10A [Yersinia phage phiYeO3-12]
>gi|9627469|ref|NP_041998.1| major capsid protein [Enterobacteria phage T7]
>gi|283788260|ref|YP_003368125.1| phage major head subunit [Citrobacter rodentium ICC168]
>gi|289551563|ref|YP_003472467.1| Phage major capsid protein Fam0118 [Staphylococcus lugdunensis HKU09-01]
>gi|227872560|ref|ZP_03990896.1| phage major capsid protein [Oribacterium sinus F0268]
>gi|195546677|ref|YP_002117758.1| major capsid protein [Pseudomonas phage PT5]
>gi|119637776|ref|YP_919012.1| Major capsid protein [Yersinia phage Berlin]
>gi|17570826|ref|NP_523335.1| major capsid protein 10A [Enterobacteria phage T3]
>gi|9626361|ref|NP_040692.1| major capsid protein [Enterobacteria phage PRD1]
>gi|9625363|ref|NP_039597.1| major coat protein [Enterobacteria phage alpha3]
>gi|167600478|ref|YP_001671977.1| major capsid protein [Pseudomonas phage LUZ19]
>gi|194186881|ref|YP_002004536.1| major head protein [Bacillus phage phi29]
>gi|9633525|ref|NP_050638.1| major head subunit [Enterobacteria phage Mu]
>gi|56694908|ref|YP_164418.1| major capsid protein [Bacillus phage BCJA1c]
>gi|39653721|ref|NP_945286.1| major head protein [Streptococcus phage EJ-1]
>gi|9628687|ref|NP_043553.1| major capsid (head) protein [Lactococcus phage c2]
>gi|157311167|ref|YP_001469212.1| major head protein [Streptococcus phage P9]
>gi|38707831|ref|NP_944891.1| major capsid protein [Enterobacteria phage Felix 01]
>gi|31711674|ref|NP_853592.1| major capsid protein [Enterobacteria phage SP6]
>gi|29565740|ref|NP_817314.1| major head protein [Staphylococcus phage 44AHJD]
>gi|22855155|ref|NP_690641.1| major head protein [Bacillus phage B103]
>gi|167583566|ref|YP_001671756.1| major head protein [Enterobacteria phage phiEco32]
>gi|281419520|ref|ZP_06250533.1| major capsid protein HK97 [Clostridium thermocellum JW20]
>gi|281419306|ref|ZP_06250321.1| major capsid protein HK97 [Clostridium thermocellum JW20]
>gi|281419010|ref|ZP_06250028.1| major capsid protein HK97 [Clostridium thermocellum JW20]
>gi|302344004|ref|YP_003808533.1| major capsid protein HK97 [Desulfarculus baarsii DSM 2075]
>gi|283852555|ref|ZP_06369822.1| major capsid protein HK97 [Desulfovibrio sp. FW1012B]
>gi|281419617|ref|ZP_06250624.1| major capsid protein HK97 [Clostridium thermocellum JW20]
>gi|49183474|ref|YP_026726.1| prophage LambdaBa04, major capsid protein [Bacillus anthracis str. Sterne]
>gi|315654943|ref|ZP_07907848.1| HK97 family major capsid protein [Mobiluncus curtisii ATCC 51333]
>gi|315634889|ref|ZP_07890171.1| major head protein [Aggregatibacter segnis ATCC 33393]
>gi|256833382|ref|YP_003162109.1| major capsid protein HK97 [Jonesia denitrificans DSM 20603]
>gi|229549067|ref|ZP_04437792.1| major capsid protein [Enterococcus faecalis ATCC 29200]
>gi|310815633|ref|YP_003963597.1| HK97 family major capsid protein [Ketogulonicigenium vulgare Y25]
>gi|218548000|ref|YP_002381791.1| major capsid protein [Escherichia fergusonii ATCC 35469]
>gi|222823855|ref|YP_002575429.1| major capsid protein, HK97 family [Campylobacter lari RM2100]
>gi|57238317|ref|YP_179444.1| HK97 family major capsid protein [Campylobacter jejuni RM1221]
>gi|77462615|ref|YP_352119.1| prophage LambdaSo, HK97 family major capsid protein [Rhodobacter sphaeroides 2.4.1]
>gi|88596225|ref|ZP_01099462.1| major capsid protein, HK97 family [Campylobacter jejuni subsp. jejuni 84-25]
>gi|239631905|ref|ZP_04674936.1| major head protein [Lactobacillus paracasei subsp. paracasei 8700:2]
>gi|237706762|ref|ZP_04537243.1| major capsid protein [Escherichia sp. 3_2_53FAA]
>gi|258516776|ref|YP_003192998.1| major capsid protein HK97 [Desulfotomaculum acetoxidans DSM 771]
>gi|257784384|ref|YP_003179601.1| major capsid protein HK97 [Atopobium parvulum DSM 20469]
>gi|159039296|ref|YP_001538549.1| phage-related major capsid protein [Salinispora arenicola CNS-205]
>gi|159039245|ref|YP_001538498.1| phage-related major capsid protein [Salinispora arenicola CNS-205]
>gi|307321386|ref|ZP_07600784.1| major capsid protein E [Sinorhizobium meliloti AK83]
>gi|307320189|ref|ZP_07599609.1| major capsid protein E [Sinorhizobium meliloti AK83]
>gi|307310222|ref|ZP_07589871.1| major capsid protein E [Sinorhizobium meliloti BL225C]
>gi|307308722|ref|ZP_07588418.1| major capsid protein E [Sinorhizobium meliloti BL225C]
>gi|223935640|ref|ZP_03627556.1| major capsid protein HK97 [bacterium Ellin514]
>gi|283954882|ref|ZP_06372398.1| major capsid protein, HK97 family [Campylobacter jejuni subsp. jejuni 414]
>gi|298291936|ref|YP_003693875.1| major capsid protein HK97 [Starkeya novella DSM 506]
>gi|170017406|ref|YP_001728325.1| major head protein-like protein [Leuconostoc citreum KM20]
>gi|293392378|ref|ZP_06636701.1| HK97 family major capsid protein [Serratia odorifera DSM 4582]
>gi|237803724|ref|ZP_04591309.1| major head protein [Pseudomonas syringae pv. oryzae str. 1_6]
>gi|148747732|ref|YP_001285811.1| major capsid protein [Geobacillus virus E2]
>gi|307336394|ref|ZP_07612506.1| Major head coat protein from bacteriophage origin [Escherichia coli H591]
>gi|197284812|ref|YP_002150684.1| major capsid protein [Proteus mirabilis HI4320]
>gi|49186801|ref|YP_030053.1| prophage LambdaBa02, major capsid protein [Bacillus anthracis str. Sterne]
>gi|168242532|ref|ZP_02667464.1| major capsid protein [Salmonella enterica subsp. enterica serovar Heidelberg str. SL486]
>gi|167553552|ref|ZP_02347301.1| major capsid protein [Salmonella enterica subsp. enterica serovar Saintpaul str. SARA29]
>gi|59712619|ref|YP_205395.1| major capsid protein [Vibrio fischeri ES114]
>gi|58581335|ref|YP_200351.1| phage-related major capsid protein [Xanthomonas oryzae pv. oryzae KACC10331]
>gi|50955858|ref|YP_063146.1| phage-related major capsid protein [Leifsonia xyli subsp. xyli str. CTCB07]
>gi|21232403|ref|NP_638320.1| phage-related major capsid protein [Xanthomonas campestris pv. campestris str. ATCC 33913]
>gi|21243373|ref|NP_642955.1| phage-related major capsid protein [Xanthomonas axonopodis pv. citri str. 306]
>gi|307546773|ref|YP_003899252.1| major capsid protein E [Halomonas elongata DSM 2581]
>gi|307348008|ref|ZP_07617613.1| Major head protein [Escherichia coli TA280]
>gi|307233966|ref|ZP_07520377.1| Major head protein [Escherichia coli TA143]
>gi|258440748|ref|ZP_05690690.1| major head protein [Staphylococcus aureus A8115]
>gi|257793413|ref|ZP_05642392.1| major head protein [Staphylococcus aureus A9781]
>gi|226313125|ref|YP_002773019.1| major head protein [Brevibacillus brevis NBRC 100599]
>gi|308181192|ref|YP_003925320.1| prophage major head protein [Lactobacillus plantarum subsp. plantarum ST-III]
>gi|194448461|ref|YP_002046458.1| major capsid protein [Salmonella enterica subsp. enterica serovar Heidelberg str. SL476]
>gi|29143740|ref|NP_807082.1| major capsid protein [Salmonella enterica subsp. enterica serovar Typhi str. Ty2]
>gi|195940285|ref|ZP_03085667.1| major capsid protein [Escherichia coli O157:H7 str. EC4024]
>gi|294616025|ref|ZP_06695849.1| major capsid protein A [Enterococcus faecium E1636]
>gi|293560411|ref|ZP_06676903.1| major capsid protein A [Enterococcus faecium E1162]
>gi|258615841|ref|ZP_05713611.1| major capsid protein [Enterococcus faecium DO]
>gi|160897081|ref|YP_001562663.1| major head protein [Delftia acidovorans SPH-1]
>gi|313123950|ref|YP_004034209.1| major capsid protein hk97 [Lactobacillus delbrueckii subsp. bulgaricus ND02]
>gi|313111245|ref|ZP_07797063.1| major head protein [Pseudomonas aeruginosa 39016]
>gi|312969554|ref|ZP_07783737.1| major head protein [Escherichia coli 1827-70]
>gi|312966358|ref|ZP_07780581.1| major head protein [Escherichia coli 2362-75]
>gi|300768472|ref|ZP_07078372.1| prophage major head protein [Lactobacillus plantarum subsp. plantarum ATCC 14917]
>gi|306813971|ref|ZP_07448144.1| major head protein (Major coat protein) from bacteriophage origin [Escherichia coli NC101]
>gi|258453882|ref|ZP_05701854.1| major head protein [Staphylococcus aureus A5937]
>gi|258418128|ref|ZP_05682393.1| major head protein [Staphylococcus aureus A9763]
>gi|253734913|ref|ZP_04869078.1| major coat protein [Staphylococcus aureus subsp. aureus TCH130]
>gi|253731496|ref|ZP_04865661.1| major capsid protein [Staphylococcus aureus subsp. aureus USA300_TCH959]
>gi|253729749|ref|ZP_04863914.1| major coat protein [Staphylococcus aureus subsp. aureus USA300_TCH959]
>gi|75762667|ref|ZP_00742508.1| Major capsid protein [Bacillus thuringiensis serovar israelensis ATCC 35646]
>gi|46581273|ref|YP_012081.1| major head protein [Desulfovibrio vulgaris str. Hildenborough]
>gi|46580573|ref|YP_011381.1| major head protein [Desulfovibrio vulgaris str. Hildenborough]
>gi|46579911|ref|YP_010719.1| HK97 family major capsid protein [Desulfovibrio vulgaris str. Hildenborough]
>gi|46578617|ref|YP_009425.1| major head protein [Desulfovibrio vulgaris str. Hildenborough]
>gi|311064303|ref|YP_003971028.1| major capsid subunit gp9 [Bifidobacterium bifidum PRL2010]
>gi|261751922|ref|ZP_05995631.1| LOW QUALITY PROTEIN: major capsid protein [Brucella suis bv. 5 str. 513]
>gi|42518404|ref|NP_964334.1| Lj965 prophage major head protein [Lactobacillus johnsonii NCC 533]
>gi|303326907|ref|ZP_07357349.1| major head protein [Desulfovibrio sp. 3_1_syn3]
>gi|298380234|ref|ZP_06989839.1| P21 prophage-derived major head protein [Escherichia coli FVEC1302]
>gi|262380911|ref|ZP_06074060.1| major capsid protein HK97 [Acinetobacter radioresistens SH164]
>gi|261209691|ref|ZP_05924018.1| major capsid protein [Enterococcus faecium TC 6]
>gi|261208944|ref|ZP_05923350.1| major capsid protein [Enterococcus faecium TC 6]
>gi|260562286|ref|ZP_05832800.1| major capsid protein [Enterococcus faecium C68]
>gi|260560394|ref|ZP_05832569.1| major capsid protein [Enterococcus faecium C68]
>gi|257891950|ref|ZP_05671603.1| major capsid protein [Enterococcus faecium 1,231,410]
>gi|257881813|ref|ZP_05661466.1| major capsid protein [Enterococcus faecium 1,231,502]
>gi|257881705|ref|ZP_05661358.1| major capsid protein [Enterococcus faecium 1,231,502]
>gi|257879498|ref|ZP_05659151.1| major capsid protein [Enterococcus faecium 1,230,933]
>gi|256854110|ref|ZP_05559475.1| major capsid protein [Enterococcus faecalis T8]
>gi|256843131|ref|ZP_05548619.1| major head protein [Lactobacillus crispatus 125-2-CHN]
>gi|254360870|ref|ZP_04977017.1| bacteriophage major capsid protein N [Mannheimia haemolytica PHL213]
>gi|254039147|ref|ZP_04873197.1| major capsid protein [Escherichia sp. 1_1_43]
>gi|238903124|ref|YP_002928920.1| Major head protein [Escherichia coli BW2952]
>gi|237738072|ref|ZP_04568553.1| major capsid protein [Fusobacterium mortiferum ATCC 9817]
>gi|237707143|ref|ZP_04537624.1| major capsid protein [Escherichia sp. 3_2_53FAA]
>gi|237706833|ref|ZP_04537314.1| major capsid protein [Escherichia sp. 3_2_53FAA]
>gi|218694809|ref|YP_002402476.1| Major head protein (Head protein gp7) [Escherichia coli 55989]
>gi|218694226|ref|YP_002401893.1| Major head coat protein from bacteriophage origin [Escherichia coli 55989]
>gi|218554102|ref|YP_002387015.1| Major head coat protein from bacteriophage origin [Escherichia coli IAI1]
>gi|218553336|ref|YP_002386249.1| Major head coat protein from bacteriophage origin [Escherichia coli IAI1]
>gi|82544584|ref|YP_408531.1| major capsid protein [Shigella boydii Sb227]
>gi|82543314|ref|YP_407261.1| major capsid protein [Shigella boydii Sb227]
>gi|218700218|ref|YP_002407847.1| Major head protein (Head protein gp7) [Escherichia coli IAI39]
>gi|218699887|ref|YP_002407516.1| major head protein (Major coat protein) from bacteriophage origin [Escherichia coli IAI39]
>gi|218690349|ref|YP_002398561.1| Major head protein from prophage [Escherichia coli ED1a]
>gi|218689827|ref|YP_002398039.1| Major head protein (Head protein gp7) [Escherichia coli ED1a]
>gi|218688851|ref|YP_002397063.1| Major head protein (Head protein gp7) [Escherichia coli ED1a]
>gi|110806593|ref|YP_690113.1| major capsid protein [Shigella flexneri 5 str. 8401]
>gi|110641354|ref|YP_669084.1| major coat protein [Escherichia coli 536]
>gi|91209967|ref|YP_539953.1| major capsid protein [Escherichia coli UTI89]
>gi|29377289|ref|NP_816443.1| major capsid protein [Enterococcus faecalis V583]
>gi|302061400|ref|ZP_07252941.1| major capsid protein E [Pseudomonas syringae pv. tomato K40]
>gi|301385638|ref|ZP_07234056.1| major capsid protein E [Pseudomonas syringae pv. tomato Max13]
>gi|300766319|ref|ZP_07076279.1| Major head protein [Listeria monocytogenes FSL N1-017]
>gi|258539067|ref|YP_003173566.1| phage-related major head protein [Lactobacillus rhamnosus Lc 705]
>gi|254555673|ref|YP_003062090.1| major head protein Cps [Lactobacillus plantarum JDM1]
>gi|237794640|ref|YP_002862192.1| mAjor capsid protein a [Clostridium botulinum Ba4 str. 657]
>gi|225857865|ref|YP_002739375.1| major head protein [Streptococcus pneumoniae 70585]
>gi|218901726|ref|YP_002449560.1| major capsid protein [Bacillus cereus AH820]
>gi|218891275|ref|YP_002440142.1| major head protein [Pseudomonas aeruginosa LESB58]
>gi|217965837|ref|YP_002351515.1| major capsid protein [Listeria monocytogenes HCC23]
>gi|188589066|ref|YP_001921497.1| mAjor capsid protein a [Clostridium botulinum E3 str. Alaska E43]
>gi|187934941|ref|YP_001886446.1| major capsid protein a [Clostridium botulinum B str. Eklund 17B]
>gi|153931746|ref|YP_001385266.1| major capsid protein [Clostridium botulinum A str. ATCC 19397]
>gi|120602112|ref|YP_966512.1| major head protein [Desulfovibrio vulgaris subsp. vulgaris DP4]
>gi|307349615|ref|ZP_07619220.1| major capsid protein [Escherichia coli TA280]
>gi|307238832|ref|ZP_07525243.1| major capsid protein E [Escherichia coli TA271]
>gi|307238809|ref|ZP_07525220.1| major head protein (Major coat protein) from bacteriophage origin [Escherichia coli TA271]
>gi|302129772|ref|ZP_07255762.1| prophage PSPPH06, major capsid protein P2 family [Pseudomonas syringae pv. tomato NCPPB 1108]
>gi|302060828|ref|ZP_07252369.1| prophage PSPPH06, major capsid protein P2 family [Pseudomonas syringae pv. tomato K40]
>gi|301386046|ref|ZP_07234464.1| prophage PSPPH06, major capsid protein P2 family [Pseudomonas syringae pv. tomato Max13]
>gi|301300712|ref|ZP_07206897.1| prophage L54a, major capsid family protein [Lactobacillus salivarius ACS-116-V-Col5a]
>gi|303245384|ref|ZP_07331668.1| major capsid protein E [Desulfovibrio fructosovorans JJ]
>gi|300715673|ref|YP_003740476.1| major capsid protein [Erwinia billingiae Eb661]
>gi|300310240|ref|YP_003774332.1| major capsid [Bacteriophage phi CTX] protein [Herbaspirillum seropedicae SmR1]
>gi|299533260|ref|ZP_07046644.1| major head protein [Comamonas testosteroni S44]
>gi|149909654|ref|ZP_01898307.1| prophage PSPPH06, major capsid protein, P2 family [Moritella sp. PE36]
>gi|24112123|ref|NP_706633.1| major capsid protein [Shigella flexneri 2a str. 301]
>gi|260843440|ref|YP_003221218.1| major capsid protein [Escherichia coli O103:H2 str. 12009]
>gi|218704651|ref|YP_002412170.1| Major head coat protein from bacteriophage origin [Escherichia coli UMN026]
>gi|218704578|ref|YP_002412097.1| Major head protein (Head protein gp7) [Escherichia coli UMN026]
>gi|218703862|ref|YP_002411381.1| major head protein (Major coat protein) from bacteriophage origin [Escherichia coli UMN026]
>gi|218558221|ref|YP_002391134.1| Major head protein (Head protein GP7) [Escherichia coli S88]
>gi|218558062|ref|YP_002390975.1| Major head protein (Head protein gp7) [Escherichia coli S88]
>gi|218557483|ref|YP_002390396.1| Major head protein (Head protein gp7) [Escherichia coli S88]
>gi|257066333|ref|YP_003152589.1| major capsid protein HK97 [Anaerococcus prevotii DSM 20548]
>gi|149911895|ref|ZP_01900495.1| prophage PSPPH06, major capsid protein, P2 family [Moritella sp. PE36]
>gi|294668768|ref|ZP_06733861.1| prophage PSPPH06, major capsid protein, P2 family [Neisseria elongata subsp. glycolytica ATCC 29315]
>gi|294624255|ref|ZP_06702966.1| phage-related major capsid protein [Xanthomonas fuscans subsp. aurantifolii str. ICPB 11122]
>gi|254933558|ref|ZP_05266917.1| major capsid protein [Listeria monocytogenes HPB2262]
>gi|291285791|ref|YP_003502609.1| Major head protein [Escherichia coli O55:H7 str. CB9615]
>gi|291282159|ref|YP_003498977.1| Major capsid protein [Escherichia coli O55:H7 str. CB9615]
>gi|291281132|ref|YP_003497950.1| Major head protein [Escherichia coli O55:H7 str. CB9615]
>gi|289679270|ref|ZP_06500160.1| major capsid protein E [Pseudomonas syringae pv. syringae FF5]
>gi|289661926|ref|ZP_06483507.1| phage-related major capsid protein [Xanthomonas campestris pv. vasculorum NCPPB702]
>gi|289648060|ref|ZP_06479403.1| prophage PSPPH06, major capsid protein P2 family [Pseudomonas syringae pv. aesculi str. 2250]
>gi|289628560|ref|ZP_06461514.1| prophage PSPPH06, major capsid protein P2 family [Pseudomonas syringae pv. aesculi str. NCPPB3681]
>gi|289566818|ref|ZP_06447229.1| major capsid protein [Enterococcus faecium D344SRF]
>gi|269978263|ref|ZP_06185213.1| major head protein Gp17 [Mobiluncus mulieris 28-1]
>gi|261494621|ref|ZP_05991102.1| major capsid protein N [Mannheimia haemolytica serotype A2 str. OVINE]
>gi|260579083|ref|ZP_05846981.1| HK97 family major capsid protein [Corynebacterium jeikeium ATCC 43734]
>gi|258545859|ref|ZP_05706093.1| P2 family prophage PSPPH06, major capsid protein [Cardiobacterium hominis ATCC 15826]
>gi|242243097|ref|ZP_04797542.1| major capsid protein [Staphylococcus epidermidis W23144]
>gi|227497001|ref|ZP_03927252.1| major capsid subunit gp9 [Actinomyces urogenitalis DSM 15434]
>gi|227355222|ref|ZP_03839627.1| major capsid protein [Proteus mirabilis ATCC 29906]
>gi|213971972|ref|ZP_03400070.1| major capsid protein E [Pseudomonas syringae pv. tomato T1]
>gi|213650506|ref|ZP_03380559.1| major capsid protein [Salmonella enterica subsp. enterica serovar Typhi str. J185]
>gi|237651606|ref|YP_002899076.1| major coat protein [Roseophage DSS3P2]
>gi|237651523|ref|YP_002898994.1| major coat protein [Roseophage EE36P1]
>gi|148724482|ref|YP_001285448.1| major capsid protein [Cyanophage Syn5]
>gi|9633571|ref|NP_050985.1| major head protein [Acyrthosiphon pisum bacteriophage APSE-1]

## Sheet: negative_MCPs_in_training_set
>gi|118725093|ref|YP_908829.1| phage portal protein [Staphylococcus phage phiNM3]
>gi|85701407|ref|YP_459992.1| conserved phage protein [Bacillus phage WBeta]
>gi|110804051|ref|YP_699943.1| phage portal protein, HK97 family [Clostridium phage phiSM101]
>gi|189426975|ref|YP_001950074.1| phage tail collar domain protein [Ralstonia phage RSL1]
>gi|281416528|ref|YP_003347329.1| phage head protein [Enterococcus phage phiFL2A]
>gi|281416469|ref|YP_003347389.1| phage head protein [Enterococcus phage phiFL4A]
>gi|257136404|ref|YP_003169678.1| HK97 family phage portal protein [Staphylococcus phage P954]
>gi|77020228|ref|YP_338135.1| phage portal protein, HK97 family [Bacillus phage Cherry]
>gi|118430764|ref|YP_873989.1| phage head morphogenesis protein [Staphylococcus phage phiNM]
>gi|77020175|ref|YP_338186.1| phage portal protein, HK97 family [Bacillus phage Gamma]
>gi|304443240|ref|YP_003857070.1| phage head morphogenesis protein [Staphylococcus phage SAP-26]
>gi|134288804|ref|YP_001111213.1| gp13, phage tail sheath protein [Burkholderia phage phiE255]
>gi|118725105|ref|YP_908841.1| phage tail tape measure protein [Staphylococcus phage phiNM3]
>gi|281416365|ref|YP_003347499.1| phage head protein [Enterococcus phage phiFL1A]
>gi|118430776|ref|YP_874001.1| phage tape measure protein [Staphylococcus phage phiNM]
>gi|110804068|ref|YP_699933.1| phage tail tape measure protein, TP901 family, core region domain protein [Clostridium phage phiSM101]
>gi|115334628|ref|YP_764474.1| phage portal protein [Geobacillus phage GBSV1]
>gi|91214215|ref|NP_919005.2| conserved phage protein [Burkholderia phage BcepNazgul]
>gi|70727679|ref|YP_257146.1| phage replication protein [Phage phiSMA9]
>gi|17426227|ref|NP_510894.1| phage assembly protein [Enterobacteria phage M13]
>gi|118430762|ref|YP_873987.1| phage terminase large subunit [Staphylococcus phage phiNM]
>gi|157168376|ref|YP_001456733.1| gp3, phage portal protein [Corynebacterium phage BFK20]
>gi|162135158|ref|YP_001595899.1| structural phage protein [Pseudomonas phage YuA]
>gi|162135154|ref|YP_001595895.1| structural phage protein [Pseudomonas phage YuA]
>gi|162135153|ref|YP_001595894.1| structural phage protein [Pseudomonas phage YuA]
>gi|162135152|ref|YP_001595893.1| structural phage protein [Pseudomonas phage YuA]
>gi|162135134|ref|YP_001595875.1| structural phage protein [Pseudomonas phage YuA]
>gi|90961239|ref|YP_535155.1| replisome organizer, phage associated [Lactobacillus phage Sal2]
>gi|53793592|ref|YP_112492.1| phage portal protein [Flavobacterium phage 11b]
>gi|118725107|ref|YP_908843.1| phage minor structural protein [Staphylococcus phage phiNM3]
>gi|156603997|ref|YP_001429943.1| phage capsid [Staphylococcus phage tp310-2]
>gi|89885997|ref|YP_516194.1| phage DNA stabilization protein [Sodalis phage phiSG1]
>gi|167600424|ref|YP_001671924.1| phage particle protein [Pseudomonas phage LUZ24]
>gi|167600423|ref|YP_001671923.1| phage particle protein [Pseudomonas phage LUZ24]
>gi|167600422|ref|YP_001671922.1| phage particle protein [Pseudomonas phage LUZ24]
>gi|94994271|ref|YP_602369.1| phage tail protein [Streptococcus phage 10750.2]
>gi|94994270|ref|YP_602368.1| phage protein [Streptococcus phage 10750.2]
>gi|94994258|ref|YP_602356.1| phage protein [Streptococcus phage 10750.2]
>gi|94992058|ref|YP_600157.1| phage protein [Streptococcus phage 2096.1]
>gi|94990348|ref|YP_598448.1| phage tail protein [Streptococcus phage 10270.2]
>gi|94990347|ref|YP_598447.1| phage protein [Streptococcus phage 10270.2]
>gi|94990335|ref|YP_598435.1| phage protein [Streptococcus phage 10270.2]
>gi|94988457|ref|YP_596558.1| phage protein [Streptococcus phage 9429.2]
>gi|15675005|ref|NP_269179.1| hyaluronidase - phage associated [Streptococcus phage 370.3]
>gi|90961771|ref|YP_535687.1| Phage tail tape mesure protein [Lactobacillus phage Sal1]
>gi|90961763|ref|YP_535679.1| Phage prohead protease [Lactobacillus phage Sal1]
>gi|90961733|ref|YP_535649.1| Phage NTP-binding protein [Lactobacillus phage Sal1]
>gi|257136417|ref|YP_003169691.1| phage minor structural protein [Staphylococcus phage P954]
>gi|257136357|ref|YP_003169631.1| phage recombinase/integrase [Staphylococcus phage P954]
>gi|126011110|ref|YP_001039935.1| phage hyaluronoglucosaminidase [Streptococcus phage phi3396]
>gi|126011109|ref|YP_001039934.1| phage endopeptidase [Streptococcus phage phi3396]
>gi|119967849|ref|YP_950679.1| conserved phage protein [Staphylococcus phage PH15]
>gi|119953696|ref|YP_950616.1| conserved phage protein [Staphylococcus phage CNPH82]
>gi|197261574|ref|YP_002154389.1| phage minor structural protein [Bacillus phage IEBH]
>gi|94994008|ref|YP_602106.1| phage protein [Streptococcus phage 10750.1]
>gi|94990096|ref|YP_598196.1| phage protein [Streptococcus phage 10270.1]
>gi|94988214|ref|YP_596315.1| phage protein [Streptococcus phage 9429.1]
>gi|119967861|ref|YP_950691.1| conserved phage protein [Staphylococcus phage PH15]
>gi|119967860|ref|YP_950690.1| phage amidase [Staphylococcus phage PH15]
>gi|119967852|ref|YP_950682.1| conserved phage protein [Staphylococcus phage PH15]
>gi|119967850|ref|YP_950680.1| conserved phage protein [Staphylococcus phage PH15]
>gi|119953709|ref|YP_950629.1| conserved phage protein [Staphylococcus phage CNPH82]
>gi|119953699|ref|YP_950619.1| conserved phage protein [Staphylococcus phage CNPH82]
>gi|119953686|ref|YP_950606.1| conserved phage protein [Staphylococcus phage CNPH82]
>gi|158267601|ref|NP_944885.2| Phage conserved protein [Enterobacteria phage Felix 01]
>gi|89886002|ref|YP_516199.1| phage DNA transfer protein [Sodalis phage phiSG1]
>gi|89885992|ref|YP_516189.1| phage portal protein [Sodalis phage phiSG1]
>gi|38707836|ref|NP_944896.1| Phage conserved structural protein [Enterobacteria phage Felix 01]
>gi|38707820|ref|NP_944857.1| Phage conserved protein [Enterobacteria phage Felix 01]
>gi|17426226|ref|NP_510893.1| phage assembly protein [Enterobacteria phage M13]
>gi|292899509|ref|YP_003538878.1| phage tail fiber protein [unidentified phage]
>gi|292898016|ref|YP_003537385.1| phage protein [unidentified phage]
>gi|94994273|ref|YP_602371.1| phage structural protein [Streptococcus phage 10750.2]
>gi|94994272|ref|YP_602370.1| phage protein [Streptococcus phage 10750.2]
>gi|94994261|ref|YP_602359.1| phage protein [Streptococcus phage 10750.2]
>gi|94994010|ref|YP_602108.1| phage endopeptidase [Streptococcus phage 10750.1]
>gi|94993988|ref|YP_602086.1| phage protein [Streptococcus phage 10750.1]
>gi|94992089|ref|YP_600188.1| phage endopeptidase [Streptococcus phage 2096.1]
>gi|94990350|ref|YP_598450.1| phage structural protein [Streptococcus phage 10270.2]
>gi|94990349|ref|YP_598449.1| phage protein [Streptococcus phage 10270.2]
>gi|94990338|ref|YP_598438.1| phage protein [Streptococcus phage 10270.2]
>gi|94990098|ref|YP_598198.1| phage endopeptidase [Streptococcus phage 10270.1]
>gi|94990076|ref|YP_598176.1| phage protein [Streptococcus phage 10270.1]
>gi|94988473|ref|YP_596574.1| phage endopeptidase [Streptococcus phage 9429.2]
>gi|94988452|ref|YP_596553.1| phage protein [Streptococcus phage 9429.2]
>gi|94988443|ref|YP_596544.1| phage protein [Streptococcus phage 9429.2]
>gi|94988216|ref|YP_596317.1| phage endopeptidase [Streptococcus phage 9429.1]
>gi|94988194|ref|YP_596295.1| phage protein [Streptococcus phage 9429.1]
>gi|71910864|ref|YP_282414.1| phage protein [Streptococcus pyogenes phage 5005.1]
>gi|71904467|ref|YP_281270.1| phage protein [Streptococcus pyogenes phage 6180.3]
>gi|15674762|ref|NP_268936.1| hyaluronidase, phage associated [Streptococcus phage 370.1]
>gi|90961776|ref|YP_535692.1| Phage minor head protein [Lactobacillus phage Sal1]
>gi|90961736|ref|YP_535652.1| Phage primase [Lactobacillus phage Sal1]
>gi|90961735|ref|YP_535651.1| Phage DNA polymerase [Lactobacillus phage Sal1]
>gi|90961729|ref|YP_535645.1| Phage helicase [Lactobacillus phage Sal1]
>gi|41179369|ref|NP_958677.1| phage tail protein [Bordetella phage BPP-1]
>gi|302344699|ref|YP_003809228.1| phage portal protein, HK97 family [Desulfarculus baarsii DSM 2075]
>gi|302343969|ref|YP_003808498.1| phage portal protein, HK97 family [Desulfarculus baarsii DSM 2075]
>gi|302338497|ref|YP_003803703.1| phage portal protein, HK97 family [Spirochaeta smaragdinae DSM 11293]
>gi|308174795|ref|YP_003921500.1| phage portal protein [Bacillus amyloliquefaciens DSM7]
>gi|308172738|ref|YP_003919443.1| Phage portal protein GP3 [Bacillus amyloliquefaciens DSM7]
>gi|187732421|ref|YP_001880084.1| phage protein [Shigella boydii CDC 3083-94]
>gi|207857401|ref|YP_002244052.1| phage immunity protein [Salmonella enterica subsp. enterica serovar Enteritidis str. P125109]
>gi|310779844|ref|YP_003968176.1| phage terminase, large subunit, PBSX family [Ilyobacter polytropus DSM 2926]
>gi|310779737|ref|YP_003968069.1| phage portal protein, lambda family [Ilyobacter polytropus DSM 2926]
>gi|310778838|ref|YP_003967171.1| phage portal protein, lambda family [Ilyobacter polytropus DSM 2926]
>gi|302344006|ref|YP_003808535.1| phage portal protein, HK97 family [Desulfarculus baarsii DSM 2075]
>gi|302343228|ref|YP_003807757.1| phage tail tape measure protein, TP901 family [Desulfarculus baarsii DSM 2075]
>gi|302343013|ref|YP_003807542.1| phage tail tape measure protein, TP901 family [Desulfarculus baarsii DSM 2075]
>gi|151266301|ref|YP_001333664.1| upper collar [Actinomyces phage Av-1]
>gi|169257214|ref|YP_001700591.1| bacteriophage side tail fiber protein; Lambda gpSft (gpN) homolog [Phage Gifsy-1]
>gi|308172469|ref|YP_003919174.1| phage terminase, large subunit, pbsx family [Bacillus amyloliquefaciens DSM7]
>gi|317120897|ref|YP_004100900.1| phage tail tape measure protein, TP901 family [Thermaerobacter marianensis DSM 12885]
>gi|150396554|ref|YP_001327021.1| HK97 family phage portal protein [Sinorhizobium medicae WSM419]
>gi|120610300|ref|YP_969978.1| HK97 family phage portal protein [Acidovorax avenae subsp. citrulli AAC00-1]
>gi|115523912|ref|YP_780823.1| HK97 family phage portal protein [Rhodopseudomonas palustris BisA53]
>gi|120599698|ref|YP_964272.1| PBSX family phage portal protein [Shewanella sp. W3-18-1]
>gi|93007441|ref|YP_579205.1| portal protein [Streptomyces phage mu1/6]
>gi|207857385|ref|YP_002244036.1| phage portal protein [Salmonella enterica subsp. enterica serovar Enteritidis str. P125109]
>gi|126461415|ref|YP_001042529.1| HK97 family phage portal protein [Rhodobacter sphaeroides ATCC 17029]
>gi|126461050|ref|YP_001042164.1| HK97 family phage portal protein [Rhodobacter sphaeroides ATCC 17029]
>gi|150394500|ref|YP_001317175.1| HK97 family phage portal protein [Staphylococcus aureus subsp. aureus JH1]
>gi|312115489|ref|YP_004013085.1| phage portal protein, lambda family [Rhodomicrobium vannielii ATCC 17100]
>gi|310779724|ref|YP_003968056.1| phage tail tape measure protein, TP901 family [Ilyobacter polytropus DSM 2926]
>gi|153009625|ref|YP_001370840.1| phage tail sheath protein [Ochrobactrum anthropi ATCC 49188]
>gi|153009619|ref|YP_001370834.1| phage late control D family protein [Ochrobactrum anthropi ATCC 49188]
>gi|152994623|ref|YP_001339458.1| PBSX family phage portal protein [Marinomonas sp. MWYL1]
>gi|146313137|ref|YP_001178211.1| PBSX family phage portal protein [Enterobacter sp. 638]
>gi|134300445|ref|YP_001113941.1| HK97 family phage portal protein [Desulfotomaculum reducens MI-1]
>gi|126173519|ref|YP_001049668.1| PBSX family phage portal protein [Shewanella baltica OS155]
>gi|121606178|ref|YP_983507.1| PBSX family phage portal protein [Polaromonas naphthalenivorans CJ2]
>gi|120603806|ref|YP_968206.1| PBSX family phage portal protein [Desulfovibrio vulgaris subsp. vulgaris DP4]
>gi|120602518|ref|YP_966918.1| PBSX family phage portal protein [Desulfovibrio vulgaris subsp. vulgaris DP4]
>gi|118580247|ref|YP_901497.1| phage tail sheath protein [Pelobacter propionicus DSM 2379]
>gi|109897021|ref|YP_660276.1| PBSX family phage portal protein [Pseudoalteromonas atlantica T6c]
>gi|74312867|ref|YP_311286.1| phage protein-related [Shigella sonnei Ss046]
>gi|297565646|ref|YP_003684618.1| phage tail tape measure protein, TP901 family [Meiothermus silvanus DSM 9946]
>gi|146276193|ref|YP_001166352.1| lambda family phage portal protein [Rhodobacter sphaeroides ATCC 17025]
>gi|99081511|ref|YP_613665.1| Phage portal protein, HK97 [Ruegeria sp. TM1040]
>gi|12719431|ref|NP_075502.1| portal protein [Staphylococcus phage phiSLT]
>gi|17426224|ref|NP_510891.1| structural protein [Enterobacteria phage M13]
>gi|169257320|ref|YP_001700696.1| bacteriophage side tail fiber protein; Lambda gpStf (gpN) homolog [Phage Gifsy-2]
>gi|319767938|ref|YP_004133439.1| phage portal protein, HK97 family [Geobacillus sp. Y412MC52]
>gi|319762146|ref|YP_004126083.1| phage portal protein, hk97 family [Alicycliphilus denitrificans BC]
>gi|317129436|ref|YP_004095718.1| phage portal protein, HK97 family [Bacillus cellulosilyticus DSM 2522]
>gi|317128806|ref|YP_004095088.1| phage portal protein, HK97 family [Bacillus cellulosilyticus DSM 2522]
>gi|317049636|ref|YP_004117284.1| phage portal protein, PBSX family [Pantoea sp. At-9b]
>gi|253689539|ref|YP_003018729.1| phage portal protein, PBSX family [Pectobacterium carotovorum subsp. carotovorum PC1]
>gi|187251107|ref|YP_001875589.1| phage portal protein [Elusimicrobium minutum Pei191]
>gi|219667511|ref|YP_002457946.1| phage portal protein, HK97 family [Desulfitobacterium hafniense DCB-2]
>gi|154247630|ref|YP_001418588.1| HK97 family phage portal protein [Xanthobacter autotrophicus Py2]
>gi|154247079|ref|YP_001418037.1| HK97 family phage portal protein [Xanthobacter autotrophicus Py2]
>gi|134297329|ref|YP_001121064.1| lambda family phage portal protein [Burkholderia vietnamiensis G4]
>gi|126463762|ref|YP_001044875.1| phage late control D family protein [Rhodobacter sphaeroides ATCC 17029]
>gi|125974225|ref|YP_001038135.1| HK97 family phage portal protein [Clostridium thermocellum ATCC 27405]
>gi|269795935|ref|YP_003315390.1| phage tail sheath protein FI [Sanguibacter keddieii DSM 10542]
>gi|148655794|ref|YP_001275999.1| phage tail sheath protein [Roseiflexus sp. RS-1]
>gi|220924912|ref|YP_002500214.1| phage portal protein, HK97 family [Methylobacterium nodulans ORS 2060]
>gi|220924161|ref|YP_002499463.1| phage portal protein, HK97 family [Methylobacterium nodulans ORS 2060]
>gi|220923958|ref|YP_002499260.1| phage portal protein, HK97 family [Methylobacterium nodulans ORS 2060]
>gi|220922575|ref|YP_002497877.1| phage portal protein, HK97 family [Methylobacterium nodulans ORS 2060]
>gi|170723106|ref|YP_001750794.1| HK97 family phage portal protein [Pseudomonas putida W619]
>gi|170720523|ref|YP_001748211.1| HK97 family phage portal protein [Pseudomonas putida W619]
>gi|207857414|ref|YP_002244065.1| phage integrase [Salmonella enterica subsp. enterica serovar Enteritidis str. P125109]
>gi|207856794|ref|YP_002243445.1| phage shock protein operon transcriptional activator [Salmonella enterica subsp. enterica serovar Enteritidis str. P125109]
>gi|168698656|ref|ZP_02730933.1| Phage portal protein [Gemmata obscuriglobus UQM 2246]
>gi|167621392|ref|ZP_02390023.1| phage tail sheath protein [Burkholderia thailandensis Bt4]
>gi|313122625|ref|YP_004044552.1| phage tail sheath protein FI [Halogeometricum borinquense DSM 11551]
>gi|150393548|ref|YP_001316223.1| HK97 family phage portal protein [Staphylococcus aureus subsp. aureus JH1]
>gi|148268439|ref|YP_001247382.1| HK97 family phage portal protein [Staphylococcus aureus subsp. aureus JH9]
>gi|148267494|ref|YP_001246437.1| HK97 family phage portal protein [Staphylococcus aureus subsp. aureus JH9]
>gi|148544340|ref|YP_001271710.1| HK97 family phage portal protein [Lactobacillus reuteri DSM 20016]
>gi|148543903|ref|YP_001271273.1| HK97 family phage portal protein [Lactobacillus reuteri DSM 20016]
>gi|312109744|ref|YP_003988060.1| phage portal protein, HK97 family [Geobacillus sp. Y4.1MC1]
>gi|148549319|ref|YP_001269421.1| HK97 family phage portal protein [Pseudomonas putida F1]
>gi|167039897|ref|YP_001662882.1| HK97 family phage portal protein [Thermoanaerobacter sp. X514]
>gi|150390176|ref|YP_001320225.1| phage portal protein [Alkaliphilus metalliredigens QYMF]
>gi|257792370|ref|YP_003182976.1| phage tail tape measure protein, TP901 family [Eggerthella lenta DSM 2243]
>gi|257063558|ref|YP_003143230.1| phage portal protein, HK97 family [Slackia heliotrinireducens DSM 20476]
>gi|254293615|ref|YP_003059638.1| phage portal protein, HK97 family [Hirschia baltica ATCC 49814]
>gi|242241228|ref|YP_002989409.1| phage portal protein, PBSX family [Dickeya dadantii Ech703]
>gi|239815454|ref|YP_002944364.1| phage portal protein, HK97 family [Variovorax paradoxus S110]
>gi|227081634|ref|YP_002810185.1| phage replication protein Cri [Vibrio cholerae M66-2]
>gi|227081628|ref|YP_002810179.1| phage replication protein Cri [Vibrio cholerae M66-2]
>gi|220930324|ref|YP_002507233.1| phage portal protein, HK97 family [Clostridium cellulolyticum H10]
>gi|220916409|ref|YP_002491713.1| phage portal protein, HK97 family [Anaeromyxobacter dehalogenans 2CP-1]
>gi|218886751|ref|YP_002436072.1| phage portal protein, HK97 family [Desulfovibrio vulgaris str. 'Miyazaki F']
>gi|218529682|ref|YP_002420498.1| phage portal protein, HK97 family [Methylobacterium chloromethanicum CM4]
>gi|218529578|ref|YP_002420394.1| phage portal protein, HK97 family [Methylobacterium chloromethanicum CM4]
>gi|194366276|ref|YP_002028886.1| phage portal protein, HK97 family [Stenotrophomonas maltophilia R551-3]
>gi|192292341|ref|YP_001992946.1| phage portal protein, HK97 family [Rhodopseudomonas palustris TIE-1]
>gi|192290484|ref|YP_001991089.1| phage portal protein, HK97 family [Rhodopseudomonas palustris TIE-1]
>gi|188581933|ref|YP_001925378.1| phage portal protein, HK97 family [Methylobacterium populi BJ001]
>gi|188580686|ref|YP_001924131.1| phage portal protein, HK97 family [Methylobacterium populi BJ001]
>gi|186472254|ref|YP_001859596.1| HK97 family phage portal protein [Burkholderia phymatum STM815]
>gi|170751345|ref|YP_001757605.1| HK97 family phage portal protein [Methylobacterium radiotolerans JCM 2831]
>gi|170732636|ref|YP_001764583.1| HK97 family phage portal protein [Burkholderia cenocepacia MC0-3]
>gi|170731563|ref|YP_001763510.1| PBSX family phage portal protein [Burkholderia cenocepacia MC0-3]
>gi|167623252|ref|YP_001673546.1| PBSX family phage portal protein [Shewanella halifaxensis HAW-EB4]
>gi|163850862|ref|YP_001638905.1| HK97 family phage portal protein [Methylobacterium extorquens PA1]
>gi|160876027|ref|YP_001555343.1| PBSX family phage portal protein [Shewanella baltica OS195]
>gi|154251359|ref|YP_001412183.1| HK97 family phage portal protein [Parvibaculum lavamentivorans DS-1]
>gi|153009636|ref|YP_001370851.1| lambda family phage portal protein [Ochrobactrum anthropi ATCC 49188]
>gi|153009114|ref|YP_001370329.1| lambda family phage portal protein [Ochrobactrum anthropi ATCC 49188]
>gi|153008836|ref|YP_001370051.1| lambda family phage portal protein [Ochrobactrum anthropi ATCC 49188]
>gi|153008816|ref|YP_001370031.1| phage late control D family protein [Ochrobactrum anthropi ATCC 49188]
>gi|146313112|ref|YP_001178186.1| phage late control D family protein [Enterobacter sp. 638]
>gi|146308986|ref|YP_001189451.1| HK97 family phage portal protein [Pseudomonas mendocina ymp]
>gi|121606205|ref|YP_983534.1| phage late control D family protein [Polaromonas naphthalenivorans CJ2]
>gi|121583523|ref|YP_973949.1| phage integrase family protein [Polaromonas naphthalenivorans CJ2]
>gi|121583417|ref|YP_973848.1| phage integrase family protein [Polaromonas naphthalenivorans CJ2]
>gi|121583050|ref|YP_973491.1| phage integrase family protein [Polaromonas naphthalenivorans CJ2]
>gi|120601917|ref|YP_966317.1| HK97 family phage portal protein [Desulfovibrio vulgaris subsp. vulgaris DP4]
>gi|307560133|ref|ZP_07623900.1| phage protein-related [Escherichia coli H299]
>gi|297585274|ref|YP_003701054.1| HK97 family phage portal protein [Bacillus selenitireducens MLS10]
>gi|297583105|ref|YP_003698885.1| HK97 family phage portal protein [Bacillus selenitireducens MLS10]
>gi|304316280|ref|YP_003851425.1| phage portal protein, HK97 family [Thermoanaerobacterium thermosaccharolyticum DSM 571]
>gi|302873681|ref|YP_003842314.1| phage portal protein, HK97 family [Clostridium cellulovorans 743B]
>gi|146277790|ref|YP_001167949.1| HK97 family phage portal protein [Rhodobacter sphaeroides ATCC 17025]
>gi|146277122|ref|YP_001167281.1| HK97 family phage portal protein [Rhodobacter sphaeroides ATCC 17025]
>gi|302385168|ref|YP_003820990.1| phage portal protein, HK97 family [Clostridium saccharolyticum WM1]
>gi|302382348|ref|YP_003818171.1| phage portal protein, HK97 family [Brevundimonas subvibrioides ATCC 15264]
>gi|300024488|ref|YP_003757099.1| phage portal protein, HK97 family [Hyphomicrobium denitrificans ATCC 51888]
>gi|300022630|ref|YP_003755241.1| phage portal protein, HK97 family [Hyphomicrobium denitrificans ATCC 51888]
>gi|298292036|ref|YP_003693975.1| phage portal protein, HK97 family [Starkeya novella DSM 506]
>gi|298290712|ref|YP_003692651.1| phage portal protein, HK97 family [Starkeya novella DSM 506]
>gi|99080899|ref|YP_613053.1| Phage portal protein, HK97 [Ruegeria sp. TM1040]
>gi|296393585|ref|YP_003658469.1| phage portal protein [Segniliparus rotundus DSM 44985]
>gi|296051583|ref|YP_003632257.1| phage portal protein, HK97 family [Planctomyces limnophilus DSM 3776]
>gi|220903519|ref|YP_002478831.1| phage portal protein, PBSX family [Desulfovibrio desulfuricans subsp. desulfuricans str. ATCC 27774]
>gi|163941506|ref|YP_001646390.1| HK97 family phage portal protein [Bacillus weihenstephanensis KBAB4]
>gi|189426916|ref|YP_001950015.1| tail sheath protein [Ralstonia phage RSL1]
>gi|118197689|ref|YP_874082.1| tail sheath protein [Thermus phage phiYS40]
>gi|9625383|ref|NP_039615.1| gene II product [Enterobacteria phage I2-2]
>gi|283787239|ref|YP_003367104.1| phage tail fibre protein [Citrobacter rodentium ICC168]
>gi|288936040|ref|YP_003440099.1| phage portal protein, PBSX family [Klebsiella variicola At-22]
>gi|227325942|ref|ZP_03829966.1| phage tail sheath protein [Pectobacterium carotovorum subsp. carotovorum WPP14]
>gi|227113053|ref|ZP_03826709.1| phage tail sheath protein [Pectobacterium carotovorum subsp. brasiliensis PBR1692]
>gi|148727195|ref|YP_001285687.1| p18 [Xanthomonas phage Xop411]
>gi|148727185|ref|YP_001285677.1| p07 [Xanthomonas phage Xop411]
>gi|85701419|ref|YP_460004.1| collagen triple helix repeat protein [Bacillus phage WBeta]
>gi|320355355|ref|YP_004196694.1| phage tail sheath protein [Desulfobulbus propionicus DSM 2032]
>gi|319957499|ref|YP_004168762.1| phage tail protein d [Nitratifractor salsuginis DSM 16511]
>gi|310819890|ref|YP_003952248.1| phage tail sheath protein [Stigmatella aurantiaca DW4/3-1]
>gi|319790048|ref|YP_004151681.1| phage head morphogenesis protein, SPP1 gp7 family [Thermovibrio ammonificans HB-1]
>gi|319764218|ref|YP_004128155.1| phage portal protein, lambda family [Alicycliphilus denitrificans BC]
>gi|319761997|ref|YP_004125934.1| phage portal protein, pbsx family [Alicycliphilus denitrificans BC]
>gi|308172747|ref|YP_003919452.1| Phage tail tape measure protein [Bacillus amyloliquefaciens DSM7]
>gi|240850447|ref|YP_002971842.1| phage late control protein D2 [Bartonella grahamii as4aup]
>gi|240849972|ref|YP_002971362.1| phage tail sheath protein FI [Bartonella grahamii as4aup]
>gi|240849967|ref|YP_002971356.1| phage late control protein D1 [Bartonella grahamii as4aup]
>gi|317128816|ref|YP_004095098.1| phage tail tape measure protein, TP901 family [Bacillus cellulosilyticus DSM 2522]
>gi|257470319|ref|ZP_05634410.1| phage late control D family protein [Fusobacterium ulcerans ATCC 49185]
>gi|257469573|ref|ZP_05633665.1| phage portal protein, HK97 family [Fusobacterium ulcerans ATCC 49185]
>gi|115351926|ref|YP_773765.1| lambda family phage portal protein [Burkholderia ambifaria AMMD]
>gi|115351905|ref|YP_773744.1| phage late control D family protein [Burkholderia ambifaria AMMD]
>gi|221316529|ref|ZP_03598334.1| phage portal protein, HK97 family [Bacillus subtilis subsp. subtilis str. NCIB 3610]
>gi|119898342|ref|YP_933555.1| phage integrase family site specific recombinase [Azoarcus sp. BH72]
>gi|186681250|ref|YP_001864446.1| phage integrase family protein [Nostoc punctiforme PCC 73102]
>gi|186680920|ref|YP_001864116.1| phage integrase family protein, XisA [Nostoc punctiforme PCC 73102]
>gi|158333499|ref|YP_001514671.1| phage tail sheath protein [Acaryochloris marina MBIC11017]
>gi|152980941|ref|YP_001354458.1| phage portal protein [Janthinobacterium sp. Marseille]
>gi|150396863|ref|YP_001327330.1| lambda family phage portal protein [Sinorhizobium medicae WSM419]
>gi|150396831|ref|YP_001327298.1| phage integrase family protein [Sinorhizobium medicae WSM419]
>gi|134295255|ref|YP_001118990.1| phage integrase family protein [Burkholderia vietnamiensis G4]
>gi|121997541|ref|YP_001002328.1| phage integrase family protein [Halorhodospira halophila SL1]
>gi|121997131|ref|YP_001001918.1| phage integrase family protein [Halorhodospira halophila SL1]
>gi|120610417|ref|YP_970095.1| phage integrase family protein [Acidovorax avenae subsp. citrulli AAC00-1]
>gi|120609369|ref|YP_969047.1| phage integrase family protein [Acidovorax avenae subsp. citrulli AAC00-1]
>gi|119946224|ref|YP_943904.1| phage integrase family protein [Psychromonas ingrahamii 37]
>gi|119385844|ref|YP_916899.1| phage integrase family protein [Paracoccus denitrificans PD1222]
>gi|119385813|ref|YP_916868.1| phage integrase family protein [Paracoccus denitrificans PD1222]
>gi|119385147|ref|YP_916203.1| phage integrase family protein [Paracoccus denitrificans PD1222]
>gi|119384162|ref|YP_915218.1| phage integrase family protein [Paracoccus denitrificans PD1222]
>gi|119383968|ref|YP_915024.1| phage integrase family protein [Paracoccus denitrificans PD1222]
>gi|116689348|ref|YP_834971.1| phage integrase family protein [Burkholderia cenocepacia HI2424]
>gi|116688949|ref|YP_834572.1| phage integrase family protein [Burkholderia cenocepacia HI2424]
>gi|116688470|ref|YP_834093.1| phage integrase family protein [Burkholderia cenocepacia HI2424]
>gi|116686981|ref|YP_840228.1| phage integrase family protein [Burkholderia cenocepacia HI2424]
>gi|114320911|ref|YP_742594.1| phage tail sheath protein [Alkalilimnicola ehrlichii MLHE-1]
>gi|110636130|ref|YP_676338.1| phage integrase [Mesorhizobium sp. BNC1]
>gi|110633561|ref|YP_673769.1| phage integrase [Mesorhizobium sp. BNC1]
>gi|107024205|ref|YP_622532.1| phage integrase [Burkholderia cenocepacia AU 1054]
>gi|107022400|ref|YP_620727.1| phage integrase [Burkholderia cenocepacia AU 1054]
>gi|92116439|ref|YP_576168.1| phage tail sheath protein [Nitrobacter hamburgensis X14]
>gi|78222344|ref|YP_384091.1| Phage tail sheath protein [Geobacter metallireducens GS-15]
>gi|39996078|ref|NP_952029.1| phage SPO1 DNA polymerase-related protein [Geobacter sulfurreducens PCA]
>gi|315497374|ref|YP_004086178.1| phage portal protein, hk97 family [Asticcacaulis excentricus CB 48]
>gi|157737884|ref|YP_001490568.1| phage tail protein D [Arcobacter butzleri RM4018]
>gi|16767463|ref|NP_463078.1| phage tail sheath protein [Salmonella enterica subsp. enterica serovar Typhimurium str. LT2]
>gi|117920441|ref|YP_869633.1| phage integrase family protein [Shewanella sp. ANA-3]
>gi|113971532|ref|YP_735325.1| phage integrase family protein [Shewanella sp. MR-4]
>gi|113970281|ref|YP_734074.1| phage integrase family protein [Shewanella sp. MR-4]
>gi|307226697|ref|ZP_07513108.1| Phage protein D [Escherichia coli TA206]
>gi|261255913|ref|ZP_05948446.1| HK97 family phage portal protein [Escherichia coli O157:H7 str. FRIK966]
>gi|261223672|ref|ZP_05937953.1| HK97 family phage portal protein [Escherichia coli O157:H7 str. FRIK2000]
>gi|120599696|ref|YP_964270.1| phage capsid scaffolding [Shewanella sp. W3-18-1]
>gi|114047528|ref|YP_738078.1| phage integrase family protein [Shewanella sp. MR-7]
>gi|114046522|ref|YP_737072.1| phage integrase family protein [Shewanella sp. MR-7]
>gi|114046252|ref|YP_736802.1| phage integrase family protein [Shewanella sp. MR-7]
>gi|116623783|ref|YP_825939.1| phage integrase family protein [Candidatus Solibacter usitatus Ellin6076]
>gi|116622012|ref|YP_824168.1| phage integrase family protein [Candidatus Solibacter usitatus Ellin6076]
>gi|116621639|ref|YP_823795.1| phage integrase family protein [Candidatus Solibacter usitatus Ellin6076]
>gi|296276329|ref|ZP_06858836.1| HK97 family phage portal protein [Staphylococcus aureus subsp. aureus MR1]
>gi|220927071|ref|YP_002502373.1| phage portal protein, HK97 family [Methylobacterium nodulans ORS 2060]
>gi|220925603|ref|YP_002500905.1| phage portal protein, lambda family [Methylobacterium nodulans ORS 2060]
>gi|220924914|ref|YP_002500216.1| peptidase U35 phage prohead HK97 [Methylobacterium nodulans ORS 2060]
>gi|220923960|ref|YP_002499262.1| peptidase U35 phage prohead HK97 [Methylobacterium nodulans ORS 2060]
>gi|220922433|ref|YP_002497735.1| phage portal protein, lambda family [Methylobacterium nodulans ORS 2060]
>gi|220920635|ref|YP_002495936.1| phage portal protein, lambda family [Methylobacterium nodulans ORS 2060]
>gi|218551329|ref|YP_002385121.1| phage tail sheath protein [Escherichia fergusonii ATCC 35469]
>gi|218551317|ref|YP_002385109.1| side tail phage protein [Escherichia fergusonii ATCC 35469]
>gi|170742281|ref|YP_001770936.1| lambda family phage portal protein [Methylobacterium sp. 4-46]
>gi|307351785|ref|ZP_07621390.1| Phage late control gene D protein (GpD) [Escherichia coli TA280]
>gi|307337803|ref|ZP_07613915.1| phage protein D [Escherichia coli H591]
>gi|261257587|ref|ZP_05950120.1| phage protein D [Escherichia coli O157:H7 str. FRIK966]
>gi|261225067|ref|ZP_05939348.1| phage protein D [Escherichia coli O157:H7 str. FRIK2000]
>gi|222823865|ref|YP_002575439.1| phage portal protein, HK97 family [Campylobacter lari RM2100]
>gi|213645947|ref|ZP_03376000.1| phage protein D [Salmonella enterica subsp. enterica serovar Typhi str. J185]
>gi|207857400|ref|YP_002244051.1| phage protein [Salmonella enterica subsp. enterica serovar Enteritidis str. P125109]
>gi|207857374|ref|YP_002244025.1| phage tape-measure protein [Salmonella enterica subsp. enterica serovar Enteritidis str. P125109]
>gi|197248492|ref|YP_002147574.1| phage tail fiber repeat-containing protein [Salmonella enterica subsp. enterica serovar Agona str. SL483]
>gi|194451783|ref|YP_002048202.1| phage tail sheath protein [Salmonella enterica subsp. enterica serovar Heidelberg str. SL476]
>gi|194449169|ref|YP_002047217.1| phage tail fiber repeat [Salmonella enterica subsp. enterica serovar Heidelberg str. SL476]
>gi|194442415|ref|YP_002043462.1| phage tail sheath protein [Salmonella enterica subsp. enterica serovar Newport str. SL254]
>gi|83310983|ref|YP_421247.1| Phage tail sheath protein FI [Magnetospirillum magneticum AMB-1]
>gi|167578772|ref|ZP_02371646.1| phage portal protein, HK97 family [Burkholderia thailandensis TXDOH]
>gi|167574266|ref|ZP_02367140.1| phage portal protein, HK97 family [Burkholderia oklahomensis C6786]
>gi|167566460|ref|ZP_02359376.1| phage portal protein, HK97 family [Burkholderia oklahomensis EO147]
>gi|167470319|ref|ZP_02335023.1| phage lambda-related protein [Yersinia pestis FV-1]
>gi|167464023|ref|ZP_02329112.1| phage tail tape measure protein, TP901 family [Paenibacillus larvae subsp. larvae BRL-230010]
>gi|257467098|ref|ZP_05631409.1| phage late control D family protein [Fusobacterium gonidiaformans ATCC 25563]
>gi|160900116|ref|YP_001565698.1| lambda family phage portal protein [Delftia acidovorans SPH-1]
>gi|160898873|ref|YP_001564455.1| lambda family phage portal protein [Delftia acidovorans SPH-1]
>gi|160897079|ref|YP_001562661.1| HK97 family phage portal protein [Delftia acidovorans SPH-1]
>gi|313122608|ref|YP_004044535.1| phage protein D [Halogeometricum borinquense DSM 11551]
>gi|94970201|ref|YP_592249.1| phage portal protein, lambda [Candidatus Koribacter versatilis Ellin345]
>gi|94967894|ref|YP_589942.1| phage tail sheath protein [Candidatus Koribacter versatilis Ellin345]
>gi|108793536|ref|YP_636686.1| phage tail protein [Yersinia pestis Antiqua]
>gi|148555106|ref|YP_001262688.1| lambda family phage portal protein [Sphingomonas wittichii RW1]
>gi|120406874|ref|YP_956703.1| phage integrase family protein [Mycobacterium vanbaalenii PYR-1]
>gi|120404858|ref|YP_954687.1| phage integrase family protein [Mycobacterium vanbaalenii PYR-1]
>gi|120404853|ref|YP_954682.1| phage integrase family protein [Mycobacterium vanbaalenii PYR-1]
>gi|120403138|ref|YP_952967.1| phage integrase family protein [Mycobacterium vanbaalenii PYR-1]
>gi|120401501|ref|YP_951330.1| phage integrase family protein [Mycobacterium vanbaalenii PYR-1]
>gi|119867746|ref|YP_937698.1| phage integrase family protein [Mycobacterium sp. KMS]
>gi|77165345|ref|YP_343870.1| Phage tail sheath protein [Nitrosococcus oceani ATCC 19707]
>gi|134046203|ref|YP_001097688.1| phage integrase family protein [Methanococcus maripaludis C5]
>gi|121595642|ref|YP_987538.1| phage integrase family protein [Acidovorax sp. JS42]
>gi|121593736|ref|YP_985632.1| phage integrase family protein [Acidovorax sp. JS42]
>gi|117926177|ref|YP_866794.1| lambda family phage portal protein [Magnetococcus sp. MC-1]
>gi|117926100|ref|YP_866717.1| lambda family phage portal protein [Magnetococcus sp. MC-1]
>gi|117926028|ref|YP_866645.1| lambda family phage portal protein [Magnetococcus sp. MC-1]
>gi|117925864|ref|YP_866481.1| lambda family phage portal protein [Magnetococcus sp. MC-1]
>gi|117925338|ref|YP_865955.1| lambda family phage portal protein [Magnetococcus sp. MC-1]
>gi|117924625|ref|YP_865242.1| lambda family phage portal protein [Magnetococcus sp. MC-1]
>gi|117924560|ref|YP_865177.1| lambda family phage portal protein [Magnetococcus sp. MC-1]
>gi|104783134|ref|YP_609632.1| phage variable tail fibre protein [Pseudomonas entomophila L48]
>gi|88195869|ref|YP_500679.1| HK97 family phage portal protein [Staphylococcus aureus subsp. aureus NCTC 8325]
>gi|88195250|ref|YP_500053.1| HK97 family phage portal protein [Staphylococcus aureus subsp. aureus NCTC 8325]
>gi|77457370|ref|YP_346875.1| Phage tail Collar [Pseudomonas fluorescens Pf0-1]
>gi|170719035|ref|YP_001784192.1| phage integrase family protein [Haemophilus somnus 2336]
>gi|157159373|ref|YP_001462390.1| phage tail domain-containing protein [Escherichia coli E24377A]
>gi|302130440|ref|ZP_07256430.1| phage tail tape measure protein lambda [Pseudomonas syringae pv. tomato NCPPB 1108]
>gi|302058945|ref|ZP_07250486.1| phage tail tape measure protein lambda [Pseudomonas syringae pv. tomato K40]
>gi|253774140|ref|YP_003036971.1| phage portal protein, PBSX family [Escherichia coli BL21-Gold(DE3)pLysS AG]
>gi|226228848|ref|YP_002762954.1| phage tail sheath protein [Gemmatimonas aurantiaca T-27]
>gi|226228846|ref|YP_002762952.1| phage tail sheath protein [Gemmatimonas aurantiaca T-27]
>gi|217973757|ref|YP_002358508.1| phage portal protein, HK97 family [Shewanella baltica OS223]
>gi|217973746|ref|YP_002358497.1| phage tail tape measure protein, lambda family [Shewanella baltica OS223]
>gi|217965839|ref|YP_002351517.1| phage portal protein, HK97 family [Listeria monocytogenes HCC23]
>gi|217964656|ref|YP_002350334.1| phage portal protein, HK97 family [Listeria monocytogenes HCC23]
>gi|213692228|ref|YP_002322814.1| phage integrase family protein [Bifidobacterium longum subsp. infantis ATCC 15697]
>gi|197118922|ref|YP_002139349.1| phage tail sheath protein [Geobacter bemidjiensis Bem]
>gi|192362398|ref|YP_001983508.1| Phage tail sheath protein [Cellvibrio japonicus Ueda107]
>gi|187923170|ref|YP_001894812.1| phage portal protein, lambda family [Burkholderia phytofirmans PsJN]
>gi|182681712|ref|YP_001829872.1| peptidase U35 phage prohead HK97 [Xylella fastidiosa M23]
>gi|182680931|ref|YP_001829091.1| peptidase U35 phage prohead HK97 [Xylella fastidiosa M23]
>gi|161520413|ref|YP_001583840.1| HK97 family phage portal protein [Burkholderia multivorans ATCC 17616]
>gi|157827291|ref|YP_001496355.1| Phage portal protein [Rickettsia bellii OSU 85-389]
>gi|157362830|ref|YP_001471689.1| lambda family phage portal protein [Serratia proteamaculans 568]
>gi|154150049|ref|YP_001403667.1| phage integrase family protein [Candidatus Methanoregula boonei 6A8]
>gi|153011655|ref|YP_001372869.1| phage integrase family protein [Ochrobactrum anthropi ATCC 49188]
>gi|153009974|ref|YP_001371189.1| phage integrase family protein [Ochrobactrum anthropi ATCC 49188]
>gi|153009491|ref|YP_001370706.1| phage integrase family protein [Ochrobactrum anthropi ATCC 49188]
>gi|153007548|ref|YP_001368763.1| phage integrase family protein [Ochrobactrum anthropi ATCC 49188]
>gi|153007056|ref|YP_001381381.1| phage integrase family protein [Anaeromyxobacter sp. Fw109-5]
>gi|153006817|ref|YP_001381142.1| phage integrase family protein [Anaeromyxobacter sp. Fw109-5]
>gi|153005509|ref|YP_001379834.1| phage integrase family protein [Anaeromyxobacter sp. Fw109-5]
>gi|153001893|ref|YP_001367574.1| phage integrase family protein [Shewanella baltica OS185]
>gi|153001763|ref|YP_001367444.1| phage integrase family protein [Shewanella baltica OS185]
>gi|153001072|ref|YP_001366753.1| phage integrase family protein [Shewanella baltica OS185]
>gi|153000783|ref|YP_001366464.1| phage integrase family protein [Shewanella baltica OS185]
>gi|153000386|ref|YP_001366067.1| phage integrase family protein [Shewanella baltica OS185]
>gi|152999312|ref|YP_001364993.1| phage integrase family protein [Shewanella baltica OS185]
>gi|150401987|ref|YP_001329281.1| phage integrase family protein [Methanococcus maripaludis C7]
>gi|146293989|ref|YP_001184413.1| phage integrase family protein [Shewanella putrefaciens CN-32]
>gi|146293708|ref|YP_001184132.1| phage integrase family protein [Shewanella putrefaciens CN-32]
>gi|145597196|ref|YP_001154659.1| phage tail protein [Yersinia pestis Pestoides F]
>gi|145590245|ref|YP_001156842.1| phage integrase family protein [Polynucleobacter necessarius subsp. asymbioticus QLW-P1DMWA-1]
>gi|145225222|ref|YP_001135900.1| phage integrase family protein [Mycobacterium gilvum PYR-GCK]
>gi|134300627|ref|YP_001114123.1| phage integrase family protein [Desulfotomaculum reducens MI-1]
>gi|134299067|ref|YP_001112563.1| lambda family phage portal protein [Desulfotomaculum reducens MI-1]
>gi|134299045|ref|YP_001112541.1| phage integrase family protein [Desulfotomaculum reducens MI-1]
>gi|126175915|ref|YP_001052064.1| phage integrase family protein [Shewanella baltica OS155]
>gi|126175914|ref|YP_001052063.1| phage integrase family protein [Shewanella baltica OS155]
>gi|126175781|ref|YP_001051930.1| phage integrase family protein [Shewanella baltica OS155]
>gi|126175754|ref|YP_001051903.1| phage integrase family protein [Shewanella baltica OS155]
>gi|126173818|ref|YP_001049967.1| phage integrase family protein [Shewanella baltica OS155]
>gi|126173817|ref|YP_001049966.1| phage integrase family protein [Shewanella baltica OS155]
>gi|126173521|ref|YP_001049670.1| phage capsid scaffolding [Shewanella baltica OS155]
>gi|126173375|ref|YP_001049524.1| phage integrase family protein [Shewanella baltica OS155]
>gi|121606180|ref|YP_983509.1| phage capsid scaffolding [Polaromonas naphthalenivorans CJ2]
>gi|121605183|ref|YP_982512.1| phage integrase family protein [Polaromonas naphthalenivorans CJ2]
>gi|121604892|ref|YP_982221.1| phage integrase family protein [Polaromonas naphthalenivorans CJ2]
>gi|120602109|ref|YP_966509.1| lambda family phage portal protein [Desulfovibrio vulgaris subsp. vulgaris DP4]
>gi|120602084|ref|YP_966484.1| phage integrase family protein [Desulfovibrio vulgaris subsp. vulgaris DP4]
>gi|120553151|ref|YP_957502.1| phage integrase family protein [Marinobacter aquaeolei VT8]
>gi|120537160|ref|YP_957217.1| phage integrase family protein [Marinobacter aquaeolei VT8]
>gi|114570055|ref|YP_756735.1| phage integrase family protein [Maricaulis maris MCS10]
>gi|109900106|ref|YP_663361.1| phage integrase [Pseudoalteromonas atlantica T6c]
>gi|108793736|ref|YP_636573.1| phage tail protein [Yersinia pestis Nepal516]
>gi|92118789|ref|YP_578518.1| phage tail sheath protein [Nitrobacter hamburgensis X14]
>gi|92117900|ref|YP_577629.1| phage tail sheath protein [Nitrobacter hamburgensis X14]
>gi|307687452|ref|ZP_07629898.1| phage portal protein, HK97 family [Clostridium cellulovorans 743B]
>gi|307686595|ref|ZP_07629041.1| phage portal protein, HK97 family [Clostridium cellulovorans 743B]
>gi|302129834|ref|ZP_07255824.1| HK97 family phage portal protein [Pseudomonas syringae pv. tomato NCPPB 1108]
>gi|301382072|ref|ZP_07230490.1| phage tail tape measure protein lambda [Pseudomonas syringae pv. tomato Max13]
>gi|301381649|ref|ZP_07230067.1| HK97 family phage portal protein [Pseudomonas syringae pv. tomato Max13]
>gi|300933462|ref|ZP_07148718.1| phage portal protein, HK97 family [Corynebacterium resistens DSM 45100]
>gi|300933368|ref|ZP_07148624.1| phage portal protein, HK97 family [Corynebacterium resistens DSM 45100]
>gi|302876340|ref|YP_003844973.1| phage tail tape measure protein, TP901 family [Clostridium cellulovorans 743B]
>gi|289578572|ref|YP_003477199.1| phage tail tape measure protein, TP901 family [Thermoanaerobacter italicus Ab9]
>gi|146278855|ref|YP_001169014.1| lambda family phage portal protein [Rhodobacter sphaeroides ATCC 17025]
>gi|146277399|ref|YP_001167558.1| HK97 family phage portal protein [Rhodobacter sphaeroides ATCC 17025]
>gi|302386146|ref|YP_003821968.1| phage portal protein, HK97 family [Clostridium saccharolyticum WM1]
>gi|302382491|ref|YP_003818314.1| phage portal protein, lambda family [Brevundimonas subvibrioides ATCC 15264]
>gi|302381196|ref|YP_003817019.1| phage portal protein, lambda family [Brevundimonas subvibrioides ATCC 15264]
>gi|302189626|ref|ZP_07266299.1| HK97 family phage portal protein [Pseudomonas syringae pv. syringae 642]
>gi|302186569|ref|ZP_07263242.1| phage tail tape measure protein lambda [Pseudomonas syringae pv. syringae 642]
>gi|300088731|ref|YP_003759253.1| phage tail tape measure protein [Dehalogenimonas lykanthroporepellens BL-DC-9]
>gi|300022741|ref|YP_003755352.1| phage portal protein, lambda family [Hyphomicrobium denitrificans ATCC 51888]
>gi|298290030|ref|YP_003691969.1| phage portal protein, HK97 family [Starkeya novella DSM 506]
>gi|99081141|ref|YP_613295.1| phage portal protein, lambda [Ruegeria sp. TM1040]
>gi|99081125|ref|YP_613279.1| phage tail sheath protein [Ruegeria sp. TM1040]
>gi|71065033|ref|YP_263760.1| phage portal protein [Psychrobacter arcticus 273-4]
>gi|261822144|ref|YP_003260250.1| phage tail tape measure protein, TP901 family [Pectobacterium wasabiae WPP163]
>gi|295688415|ref|YP_003592108.1| phage portal protein [Caulobacter segnis ATCC 21756]
>gi|294859261|ref|ZP_06797030.1| phage portal protein [Acinetobacter sp. 6013150]
>gi|294840070|ref|ZP_06784753.1| phage portal protein [Acinetobacter sp. 6013113]
>gi|257066342|ref|YP_003152598.1| phage tail tape measure protein, TP901 family [Anaerococcus prevotii DSM 20548]
>gi|261418103|ref|YP_003251785.1| phage portal protein, HK97 family [Geobacillus sp. Y412MC61]
>gi|118197623|ref|YP_874016.1| portal protein [Thermus phage phiYS40]
>gi|9625389|ref|NP_039621.1| gene III product [Enterobacteria phage I2-2]
>gi|9625382|ref|NP_039614.1| gene IV product [Enterobacteria phage I2-2]
>gi|262194133|ref|YP_003265342.1| phage portal protein, PBSX family [Haliangium ochraceum DSM 14365]
>gi|262193961|ref|YP_003265170.1| phage portal protein, PBSX family [Haliangium ochraceum DSM 14365]
>gi|52788054|ref|YP_093882.1| phage lambda-related protein [Yersinia pestis]
>gi|281416259|ref|YP_003347608.1| head protein [Enterococcus phage phiFL3A]
>gi|288353318|ref|YP_003422616.1| phage portal protein, PBSX family [Zymomonas mobilis subsp. mobilis ZM4]
>gi|260168346|ref|ZP_05755157.1| phage portal protein, HK97 family [Brucella sp. F5/99]
>gi|256257119|ref|ZP_05462655.1| phage portal protein, HK97 family protein [Brucella abortus bv. 9 str. C68]
>gi|256254618|ref|ZP_05460154.1| phage portal protein, HK97 family protein [Brucella ceti B1/94]
>gi|256159313|ref|ZP_05457103.1| phage portal protein, HK97 family protein [Brucella ceti M490/95/1]
>gi|256113128|ref|ZP_05454005.1| phage portal protein, HK97 family protein [Brucella melitensis bv. 3 str. Ether]
>gi|256060718|ref|ZP_05450882.1| phage portal protein, HK97 family protein [Brucella neotomae 5K33]
>gi|256044295|ref|ZP_05447199.1| phage portal protein, HK97 family protein [Brucella melitensis bv. 1 str. Rev.1]
>gi|256031210|ref|ZP_05444824.1| phage portal protein, HK97 family protein [Brucella pinnipedialis M292/94/1]
>gi|254729903|ref|ZP_05188481.1| phage portal protein, HK97 family protein [Brucella abortus bv. 4 str. 292]
>gi|254717217|ref|ZP_05179028.1| phage portal protein, HK97 family protein [Brucella ceti M13/05/1]
>gi|254713725|ref|ZP_05175536.1| phage portal protein, HK97 family protein [Brucella ceti M644/93/1]
>gi|254709719|ref|ZP_05171530.1| phage portal protein, HK97 family protein [Brucella pinnipedialis B2/94]
>gi|254707697|ref|ZP_05169525.1| phage portal protein, HK97 family protein [Brucella pinnipedialis M163/99/10]
>gi|254703926|ref|ZP_05165754.1| HK97 family phage portal protein [Brucella suis bv. 3 str. 686]
>gi|254701381|ref|ZP_05163209.1| phage portal protein, HK97 family protein [Brucella suis bv. 5 str. 513]
>gi|254697002|ref|ZP_05158830.1| phage portal protein, HK97 family protein [Brucella abortus bv. 2 str. 86/8/59]
>gi|254693352|ref|ZP_05155180.1| phage portal protein, HK97 family protein [Brucella abortus bv. 3 str. Tulya]
>gi|254688871|ref|ZP_05152125.1| phage portal protein, HK97 family protein [Brucella abortus bv. 6 str. 870]
>gi|156564118|ref|YP_001429628.1| tail sheath paralog [Bacillus phage 0305phi8-36]
>gi|119855367|ref|YP_935970.1| phage integrase family protein [Mycobacterium sp. KMS]
>gi|29028698|ref|NP_803386.1| portal protein [Staphylococcus phage phi13]
>gi|29028648|ref|NP_803337.1| head portal protein [Staphylococcus phage phi 12]
>gi|151266305|ref|YP_001333668.1| encapsidation protein [Actinomyces phage Av-1]
>gi|151266304|ref|YP_001333667.1| antireceptor [Actinomyces phage Av-1]
>gi|151266300|ref|YP_001333663.1| tail protein [Actinomyces phage Av-1]
>gi|151266296|ref|YP_001333659.1| DNA polymerase [Actinomyces phage Av-1]
>gi|151266295|ref|YP_001333658.1| terminal protein [Actinomyces phage Av-1]
>gi|148727187|ref|YP_001285679.1| p09 [Xanthomonas phage Xop411]
>gi|85701401|ref|YP_459986.1| FtsK/SpoIIIE family protein [Bacillus phage WBeta]
>gi|17426218|ref|NP_510885.1| replication protein [Enterobacteria phage M13]
>gi|209363588|ref|YP_002268006.1| portal protein [Staphylococcus phage phi2958PVL]
>gi|213419058|ref|ZP_03352124.1| phage protein D [Salmonella enterica subsp. enterica serovar Typhi str. E01-6750]
>gi|169257235|ref|YP_001700612.1| DNA packaging protein; large terminase subunit; Lambda gpA homolog [Phage Gifsy-1]
>gi|169257233|ref|YP_001700610.1| bacteriophage portal protein; Lambda gpB homolog [Phage Gifsy-1]
>gi|320156409|ref|YP_004188788.1| phage portal protein [Vibrio vulnificus MO6-24/O]
>gi|307348589|ref|ZP_07618194.1| phage integrase [Escherichia coli TA280]
>gi|307225192|ref|ZP_07511603.1| TP901 family phage tail tape measure protein [Escherichia coli TA206]
>gi|302189548|ref|ZP_07266221.1| Phage tail tape measure protein TP901, core region [Pseudomonas syringae pv. syringae 642]
>gi|253316781|ref|ZP_04839994.1| phage portal protein [Staphylococcus aureus subsp. aureus str. CF-Marseille]
>gi|310819882|ref|YP_003952240.1| phage late control gene d protein [Stigmatella aurantiaca DW4/3-1]
>gi|310819775|ref|YP_003952133.1| phage late control gene d protein [Stigmatella aurantiaca DW4/3-1]
>gi|310818177|ref|YP_003950535.1| phage portal protein [Stigmatella aurantiaca DW4/3-1]
>gi|226366384|ref|YP_002784167.1| phage portal protein [Rhodococcus opacus B4]
>gi|219683254|ref|YP_002469637.1| phage prohead protease, HK97 family [Bifidobacterium animalis subsp. lactis AD011]
>gi|319775750|ref|YP_004138238.1| phage tail fiber protein [Haemophilus influenzae F3047]
>gi|297625638|ref|YP_003687401.1| phage integrase [Propionibacterium freudenreichii subsp. shermanii CIRM-BIA1]
>gi|319891795|ref|YP_004148670.1| Portal protein, phage associated [Staphylococcus pseudintermedius HKU10-03]
>gi|319786769|ref|YP_004146244.1| phage terminase, large subunit, PBSX family [Pseudoxanthomonas suwonensis 11-1]
>gi|319764211|ref|YP_004128148.1| phage tail tape measure protein, tp901 family [Alicycliphilus denitrificans BC]
>gi|319761969|ref|YP_004125906.1| phage tail tape measure protein, tp901 family [Alicycliphilus denitrificans BC]
>gi|308172844|ref|YP_003919549.1| phage tail tape measure protein, family, core region [Bacillus amyloliquefaciens DSM7]
>gi|308172486|ref|YP_003919191.1| structural protein [Bacillus phage SPP1] [Bacillus amyloliquefaciens DSM7]
>gi|21910637|ref|NP_664905.1| hyaluronoglucosaminidase - phage associated [Streptococcus pyogenes MGAS315]
>gi|240851061|ref|YP_002972461.1| phage late control protein D5 [Bartonella grahamii as4aup]
>gi|240850934|ref|YP_002972334.1| phage late control protein D4 [Bartonella grahamii as4aup]
>gi|240850534|ref|YP_002971933.1| phage late control protein D3 [Bartonella grahamii as4aup]
>gi|311107209|ref|YP_003980062.1| phage portal protein, HK97 family [Achromobacter xylosoxidans A8]
>gi|317132788|ref|YP_004092102.1| phage tail component [Ethanoligenens harbinense YUAN-3]
>gi|317132787|ref|YP_004092101.1| phage tail tape measure protein, TP901 family [Ethanoligenens harbinense YUAN-3]
>gi|317129425|ref|YP_004095707.1| phage tail tape measure protein, TP901 family [Bacillus cellulosilyticus DSM 2522]
>gi|134287548|ref|YP_001109714.1| phage integrase family protein [Burkholderia vietnamiensis G4]
>gi|254560549|ref|YP_003067644.1| Phage portal protein, HK97 [Methylobacterium extorquens DM4]
>gi|240137989|ref|YP_002962461.1| Phage portal protein, HK97 [Methylobacterium extorquens AM1]
>gi|197285844|ref|YP_002151716.1| phage portal protein [Proteus mirabilis HI4320]
>gi|197285822|ref|YP_002151694.1| regulator of late phage gene expression [Proteus mirabilis HI4320]
>gi|197284834|ref|YP_002150706.1| phage integrase [Proteus mirabilis HI4320]
>gi|197284810|ref|YP_002150682.1| phage portal protein [Proteus mirabilis HI4320]
>gi|190571708|ref|YP_001976066.1| phage late control gene d protein GpD [Wolbachia endosymbiont of Culex quinquefasciatus Pel]
>gi|190571056|ref|YP_001975414.1| phage portal protein, HK97 family [Wolbachia endosymbiont of Culex quinquefasciatus Pel]
>gi|190570875|ref|YP_001975233.1| phage late control gene d protein GpD [Wolbachia endosymbiont of Culex quinquefasciatus Pel]
>gi|187734218|ref|YP_001880036.1| site-specific recombinase, phage integrase family [Shigella boydii CDC 3083-94]
>gi|187734053|ref|YP_001880959.1| phage late control gene D protein [Shigella boydii CDC 3083-94]
>gi|148379651|ref|YP_001254192.1| phage protein [Clostridium botulinum A str. ATCC 3502]
>gi|148284911|ref|YP_001249001.1| HK97 family phage portal protein [Orientia tsutsugamushi str. Boryong]
>gi|119898154|ref|YP_933367.1| phage integrase family site specific recombinase [Azoarcus sp. BH72]
>gi|87161728|ref|YP_494591.1| phage portal protein [Staphylococcus aureus subsp. aureus USA300_FPR3757]
>gi|219667520|ref|YP_002457955.1| phage tail tape measure protein, TP901 family [Desulfitobacterium hafniense DCB-2]
>gi|206558495|ref|YP_002229255.1| phage late control gene D protein [Burkholderia cenocepacia J2315]
>gi|161486833|ref|YP_504660.2| HK97 family phage portal protein [Anaplasma phagocytophilum HZ]
>gi|150016526|ref|YP_001308780.1| TP901 family phage tail tape measure protein [Clostridium beijerinckii NCIMB 8052]
>gi|148653076|ref|YP_001280169.1| phage integrase family protein [Psychrobacter sp. PRwf-1]
>gi|148652536|ref|YP_001279629.1| phage integrase family protein [Psychrobacter sp. PRwf-1]
>gi|148652497|ref|YP_001279590.1| phage integrase family protein [Psychrobacter sp. PRwf-1]
>gi|148259822|ref|YP_001233949.1| phage integrase family protein [Acidiphilium cryptum JF-5]
>gi|148259299|ref|YP_001233426.1| phage integrase family protein [Acidiphilium cryptum JF-5]
>gi|148257822|ref|YP_001242407.1| lambda family phage portal protein [Bradyrhizobium sp. BTAi1]
>gi|146302080|ref|YP_001196671.1| phage integrase family protein [Flavobacterium johnsoniae UW101]
>gi|146298371|ref|YP_001192962.1| phage integrase family protein [Flavobacterium johnsoniae UW101]
>gi|134296758|ref|YP_001120493.1| phage integrase family protein [Burkholderia vietnamiensis G4]
>gi|134291483|ref|YP_001115252.1| phage integrase family protein [Burkholderia vietnamiensis G4]
>gi|126178708|ref|YP_001046673.1| phage integrase family protein [Methanoculleus marisnigri JR1]
>gi|125974241|ref|YP_001038151.1| phage NTP-binding protein [Clostridium thermocellum ATCC 27405]
>gi|120609495|ref|YP_969173.1| phage integrase family protein [Acidovorax avenae subsp. citrulli AAC00-1]
>gi|119946569|ref|YP_944249.1| phage integrase family protein [Psychromonas ingrahamii 37]
>gi|119383089|ref|YP_914145.1| phage integrase family protein [Paracoccus denitrificans PD1222]
>gi|119357861|ref|YP_912505.1| phage integrase family protein [Chlorobium phaeobacteroides DSM 266]
>gi|110632556|ref|YP_672764.1| phage integrase [Mesorhizobium sp. BNC1]
>gi|107022005|ref|YP_620332.1| phage integrase [Burkholderia cenocepacia AU 1054]
>gi|92116963|ref|YP_576692.1| Phage portal protein, HK97 [Nitrobacter hamburgensis X14]
>gi|92115966|ref|YP_575695.1| Phage portal protein, HK97 [Nitrobacter hamburgensis X14]
>gi|91205574|ref|YP_537929.1| Phage portal protein [Rickettsia bellii RML369-C]
>gi|90423309|ref|YP_531679.1| Phage portal protein, HK97 [Rhodopseudomonas palustris BisB18]
>gi|88658099|ref|YP_506866.1| HK97 family phage portal protein [Ehrlichia chaffeensis str. Arkansas]
>gi|87198671|ref|YP_495928.1| Phage portal protein, HK97 [Novosphingobium aromaticivorans DSM 12444]
>gi|86750599|ref|YP_487095.1| Phage portal protein, HK97 [Rhodopseudomonas palustris HaA2]
>gi|85059677|ref|YP_455379.1| phage integrase [Sodalis glossinidius str. 'morsitans']
>gi|85058701|ref|YP_454403.1| phage portal protein [Sodalis glossinidius str. 'morsitans']
>gi|77465360|ref|YP_354863.1| Phage tail protein D [Rhodobacter sphaeroides 2.4.1]
>gi|73666646|ref|YP_302662.1| HK97 family phage portal protein [Ehrlichia canis str. Jake]
>gi|42779479|ref|NP_976726.1| HK97 family phage portal protein [Bacillus cereus ATCC 10987]
>gi|42520823|ref|NP_966738.1| HK97 family phage portal protein [Wolbachia endosymbiont of Drosophila melanogaster]
>gi|17546409|ref|NP_519811.1| phage hk97 tail length tape measure-related protein [Ralstonia solanacearum GMI1000]
>gi|226355562|ref|YP_002785302.1| phage protein D [Deinococcus deserti VCD115]
>gi|157737940|ref|YP_001490624.1| phage integrase family site specific recombinase [Arcobacter butzleri RM4018]
>gi|315443021|ref|YP_004075900.1| phage integrase family protein [Mycobacterium sp. Spyr1]
>gi|313667676|ref|YP_004047960.1| phage related protein [Neisseria lactamica ST-640]
>gi|307546776|ref|YP_003899255.1| phage portal protein, lambda family [Halomonas elongata DSM 2581]
>gi|307545892|ref|YP_003898371.1| site-specific recombinase, phage integrase family [Halomonas elongata DSM 2581]
>gi|307545255|ref|YP_003897734.1| phage integrase family protein [Halomonas elongata DSM 2581]
>gi|281491975|ref|YP_003353955.1| phage replication protein [Lactococcus lactis subsp. lactis KF147]
>gi|256833391|ref|YP_003162118.1| phage tail tape measure protein, TP901 family [Jonesia denitrificans DSM 20603]
>gi|225852114|ref|YP_002732347.1| phage portal protein [Brucella melitensis ATCC 23457]
>gi|113971117|ref|YP_734910.1| phage integrase family protein [Shewanella sp. MR-4]
>gi|307226696|ref|ZP_07513107.1| phage tail sheath protein [Escherichia coli TA206]
>gi|307143196|ref|ZP_07501628.1| phage integrase [Escherichia coli M605]
>gi|198246051|ref|YP_002216029.1| phage portal protein, HK97 family [Salmonella enterica subsp. enterica serovar Dublin str. CT_02021853]
>gi|198244478|ref|YP_002216702.1| phage late control D family protein [Salmonella enterica subsp. enterica serovar Dublin str. CT_02021853]
>gi|198242747|ref|YP_002216727.1| phage portal protein, pbsx family [Salmonella enterica subsp. enterica serovar Dublin str. CT_02021853]
>gi|194736014|ref|YP_002115127.1| phage portal protein, HK97 family protein [Salmonella enterica subsp. enterica serovar Schwarzengrund str. CVM19633]
>gi|194734728|ref|YP_002117150.1| phage portal protein, HK97 family protein [Salmonella enterica subsp. enterica serovar Schwarzengrund str. CVM19633]
>gi|120599682|ref|YP_964256.1| TP901 family phage tail tape measure protein [Shewanella sp. W3-18-1]
>gi|120599306|ref|YP_963880.1| phage replication protein O [Shewanella sp. W3-18-1]
>gi|120599274|ref|YP_963848.1| lambda family phage tail tape measure protein [Shewanella sp. W3-18-1]
>gi|93007413|ref|YP_579177.1| integrase [Streptomyces phage mu1/6]
>gi|116619488|ref|YP_821644.1| phage integrase family protein [Candidatus Solibacter usitatus Ellin6076]
>gi|80159771|ref|YP_398515.1| botulinum neurotoxin type C1 nontoxic-nonhemagglutinin component [Clostridium phage c-st]
>gi|80159768|ref|YP_398512.1| hemoagglutinin component HA-70 [Clostridium phage c-st]
>gi|296276206|ref|ZP_06858713.1| TP901 family phage tail tape measure protein [Staphylococcus aureus subsp. aureus MR1]
>gi|296276194|ref|ZP_06858701.1| phage portal protein [Staphylococcus aureus subsp. aureus MR1]
>gi|290960849|ref|YP_003492031.1| phage portal protein [Streptomyces scabiei 87.22]
>gi|285017063|ref|YP_003374774.1| phage integrase protein [Xanthomonas albilineans]
>gi|284025013|ref|ZP_06379411.1| phage portal protein [Staphylococcus aureus subsp. aureus 132]
>gi|310828690|ref|YP_003961047.1| phage portal protein [Eubacterium limosum KIST612]
>gi|310826889|ref|YP_003959246.1| phage portal protein [Eubacterium limosum KIST612]
>gi|310816460|ref|YP_003964424.1| HK97 family phage portal protein [Ketogulonicigenium vulgare Y25]
>gi|218551322|ref|YP_002385114.1| control protein for phage late genes expression [Escherichia fergusonii ATCC 35469]
>gi|218549996|ref|YP_002383787.1| Phage late control gene D protein (GPD) [Escherichia fergusonii ATCC 35469]
>gi|218547998|ref|YP_002381789.1| phage portal protein [Escherichia fergusonii ATCC 35469]
>gi|207739307|ref|YP_002257700.1| phage replication cri-related protein [Ralstonia solanacearum IPO1609]
>gi|207724099|ref|YP_002254497.1| phage hk97 tail length tape measure-related protein [Ralstonia solanacearum MolK2]
>gi|193213985|ref|YP_001995184.1| phage tail tape measure protein [Chloroherpeton thalassium ATCC 35110]
>gi|170742263|ref|YP_001770918.1| TP901 family phage tail tape measure protein [Methylobacterium sp. 4-46]
>gi|167034392|ref|YP_001669623.1| lambda family phage tail tape measure protein [Pseudomonas putida GB-1]
>gi|167032210|ref|YP_001667441.1| lambda family phage portal protein [Pseudomonas putida GB-1]
>gi|307351758|ref|ZP_07621363.1| Phage protein Q [Escherichia coli TA280]
>gi|307348282|ref|ZP_07617887.1| TP901 family phage tail tape measure protein [Escherichia coli TA280]
>gi|307348254|ref|ZP_07617859.1| phage portal protein, PBSX family [Escherichia coli TA280]
>gi|307230303|ref|ZP_07516714.1| TP901 family phage tail tape measure protein [Escherichia coli TA143]
>gi|261257613|ref|ZP_05950146.1| phage capsid protein [Escherichia coli O157:H7 str. FRIK966]
>gi|261225040|ref|ZP_05939321.1| phage capsid protein [Escherichia coli O157:H7 str. FRIK2000]
>gi|256021036|ref|ZP_05434901.1| TP901 family phage tail tape measure protein [Shigella sp. D9]
>gi|213645941|ref|ZP_03375994.1| phage tail sheath protein [Salmonella enterica subsp. enterica serovar Typhi str. J185]
>gi|213416897|ref|ZP_03350041.1| phage tail sheath protein [Salmonella enterica subsp. enterica serovar Typhi str. E01-6750]
>gi|207857395|ref|YP_002244046.1| phage protein [Salmonella enterica subsp. enterica serovar Enteritidis str. P125109]
>gi|207857365|ref|YP_002244016.1| phage protein [Salmonella enterica subsp. enterica serovar Enteritidis str. P125109]
>gi|197250221|ref|YP_002147629.1| phage late control D family protein [Salmonella enterica subsp. enterica serovar Agona str. SL483]
>gi|197249375|ref|YP_002147655.1| phage portal protein, pbsx family [Salmonella enterica subsp. enterica serovar Agona str. SL483]
>gi|194450777|ref|YP_002047237.1| phage portal protein, pbsx family [Salmonella enterica subsp. enterica serovar Heidelberg str. SL476]
>gi|194445286|ref|YP_002041984.1| phage portal protein pbsx family [Salmonella enterica subsp. enterica serovar Newport str. SL254]
>gi|194444567|ref|YP_002043299.1| phage portal protein pbsx family [Salmonella enterica subsp. enterica serovar Newport str. SL254]
>gi|89054123|ref|YP_509574.1| Phage portal protein, HK97 [Jannaschia sp. CCS1]
>gi|76812188|ref|YP_331751.1| Phage portal protein [Burkholderia pseudomallei 1710b]
>gi|76809174|ref|YP_333083.1| HK97 family phage portal protein [Burkholderia pseudomallei 1710b]
>gi|255006753|ref|ZP_05145354.2| phage portal protein [Staphylococcus aureus subsp. aureus Mu50-omega]
>gi|195938283|ref|ZP_03083665.1| phage tail sheath protein [Escherichia coli O157:H7 str. EC4024]
>gi|167911607|ref|ZP_02498698.1| phage tail sheath protein [Burkholderia pseudomallei 112]
>gi|167911603|ref|ZP_02498694.1| phage P2 GpU family protein [Burkholderia pseudomallei 112]
>gi|167893343|ref|ZP_02480745.1| phage P2 GpU family protein [Burkholderia pseudomallei 7894]
>gi|167893339|ref|ZP_02480741.1| phage tail sheath protein [Burkholderia pseudomallei 7894]
>gi|167851705|ref|ZP_02477213.1| phage portal protein, PBSX family [Burkholderia pseudomallei B7210]
>gi|167840024|ref|ZP_02466708.1| phage tail sheath protein [Burkholderia thailandensis MSMB43]
>gi|167824873|ref|ZP_02456344.1| phage tail sheath protein [Burkholderia pseudomallei 9]
>gi|167824868|ref|ZP_02456339.1| phage P2 GpU family protein [Burkholderia pseudomallei 9]
>gi|167814852|ref|ZP_02446532.1| phage P2 GpU family protein [Burkholderia pseudomallei 91]
>gi|167814848|ref|ZP_02446528.1| phage tail sheath protein [Burkholderia pseudomallei 91]
>gi|167744466|ref|ZP_02417240.1| phage P2 GpU family protein [Burkholderia pseudomallei 14]
>gi|167744462|ref|ZP_02417236.1| phage tail sheath protein [Burkholderia pseudomallei 14]
>gi|167725620|ref|ZP_02408856.1| phage tail sheath protein [Burkholderia pseudomallei DM98]
>gi|167725616|ref|ZP_02408852.1| phage P2 GpU family protein [Burkholderia pseudomallei DM98]
>gi|167619946|ref|ZP_02388577.1| phage portal protein, PBSX family [Burkholderia thailandensis Bt4]
>gi|167619493|ref|ZP_02388124.1| phage P2 GpU family protein [Burkholderia thailandensis Bt4]
>gi|167619488|ref|ZP_02388119.1| phage tail sheath protein [Burkholderia thailandensis Bt4]
>gi|167567113|ref|ZP_02360029.1| phage portal protein, PBSX family [Burkholderia oklahomensis EO147]
>gi|167466943|ref|ZP_02331647.1| phage tail protein [Yersinia pestis FV-1]
>gi|258615839|ref|ZP_05713609.1| phage portal protein, HK97 family [Enterococcus faecium DO]
>gi|224501840|ref|ZP_03670147.1| phage portal protein, HK97 family [Listeria monocytogenes FSL R2-561]
>gi|160898063|ref|YP_001563645.1| TP901 family phage tail tape measure protein [Delftia acidovorans SPH-1]
>gi|160898029|ref|YP_001563611.1| TP901 family phage tail tape measure protein [Delftia acidovorans SPH-1]
>gi|160897385|ref|YP_001562967.1| PBSX family phage terminase large subunit [Delftia acidovorans SPH-1]
>gi|126462791|ref|YP_001043905.1| phage integrase family protein [Rhodobacter sphaeroides ATCC 17029]
>gi|126461068|ref|YP_001042182.1| phage integrase family protein [Rhodobacter sphaeroides ATCC 17029]
>gi|126461063|ref|YP_001042177.1| phage terminase [Rhodobacter sphaeroides ATCC 17029]
>gi|77462617|ref|YP_352121.1| HK97 family phage portal protein [Rhodobacter sphaeroides 2.4.1]
>gi|313123952|ref|YP_004034211.1| phage portal protein, hk97 family [Lactobacillus delbrueckii subsp. bulgaricus ND02]
>gi|313122614|ref|YP_004044541.1| phage tail protein [Halogeometricum borinquense DSM 11551]
>gi|237814042|ref|YP_002898493.1| phage portal protein, pbsx family [Burkholderia pseudomallei MSHR346]
>gi|237810326|ref|YP_002894777.1| phage portal protein, pbsx family [Burkholderia pseudomallei MSHR346]
>gi|148268427|ref|YP_001247370.1| TP901 family phage tail tape measure protein [Staphylococcus aureus subsp. aureus JH9]
>gi|126451629|ref|YP_001064430.1| PBSX family phage portal protein [Burkholderia pseudomallei 1106a]
>gi|126451045|ref|YP_001082264.1| PBSX family phage portal protein [Burkholderia mallei NCTC 10247]
>gi|126450908|ref|YP_001081864.1| PBSX family phage portal protein [Burkholderia mallei NCTC 10247]
>gi|126449718|ref|YP_001081843.1| PBSX family phage portal protein [Burkholderia mallei NCTC 10247]
>gi|126440262|ref|YP_001057190.1| PBSX family phage portal protein [Burkholderia pseudomallei 668]
>gi|124385871|ref|YP_001027789.1| PBSX family phage portal protein [Burkholderia mallei NCTC 10229]
>gi|53724245|ref|YP_104214.1| PBSX family phage portal protein [Burkholderia mallei ATCC 23344]
>gi|148544372|ref|YP_001271742.1| phage integrase family protein [Lactobacillus reuteri DSM 20016]
>gi|148544065|ref|YP_001271435.1| SPP1 family phage head morphogenesis protein [Lactobacillus reuteri DSM 20016]
>gi|222147654|ref|YP_002548611.1| phage lambdaBa02, DNA replication protein [Agrobacterium vitis S4]
>gi|116670747|ref|YP_831680.1| phage integrase family protein [Arthrobacter sp. FB24]
>gi|161484812|ref|NP_669294.2| phage shock protein operon transcriptional activator [Yersinia pestis KIM 10]
>gi|312127007|ref|YP_003991881.1| phage tail tape measure protein, tp901 family [Caldicellulosiruptor hydrothermalis 108]
>gi|262201167|ref|YP_003272375.1| phage tail tape measure protein, TP901 family [Gordonia bronchialis DSM 43247]
>gi|148553081|ref|YP_001260663.1| phage integrase family protein [Sphingomonas wittichii RW1]
>gi|148550554|ref|YP_001259993.1| phage integrase family protein [Sphingomonas wittichii RW1]
>gi|311279184|ref|YP_003941415.1| phage tail tape measure protein, lambda family [Enterobacter cloacae SCF1]
>gi|311068902|ref|YP_003973825.1| Phage protein [Bacillus atrophaeus 1942]
>gi|212638507|ref|YP_002315027.1| phage portal protein [Anoxybacillus flavithermus WK1]
>gi|150021327|ref|YP_001306681.1| TP901 family phage tail tape measure protein [Thermosipho melanesiensis BI429]
>gi|148549356|ref|YP_001269458.1| phage integrase family protein [Pseudomonas putida F1]
>gi|148549321|ref|YP_001269423.1| peptidase U35, phage prohead HK97 [Pseudomonas putida F1]
>gi|145592624|ref|YP_001156921.1| phage integrase family protein [Salinispora tropica CNB-440]
>gi|126436488|ref|YP_001072179.1| phage integrase family protein [Mycobacterium sp. JLS]
>gi|126434804|ref|YP_001070495.1| phage integrase family protein [Mycobacterium sp. JLS]
>gi|120403496|ref|YP_953325.1| phage integrase family protein [Mycobacterium vanbaalenii PYR-1]
>gi|120402128|ref|YP_951957.1| phage integrase family protein [Mycobacterium vanbaalenii PYR-1]
>gi|119717196|ref|YP_924161.1| phage integrase family protein [Nocardioides sp. JS614]
>gi|119716492|ref|YP_923457.1| phage integrase family protein [Nocardioides sp. JS614]
>gi|119714829|ref|YP_921794.1| phage integrase family protein [Nocardioides sp. JS614]
>gi|116751410|ref|YP_848097.1| phage integrase family protein [Syntrophobacter fumaroxidans MPOB]
>gi|116751250|ref|YP_847937.1| phage tail protein [Syntrophobacter fumaroxidans MPOB]
>gi|116751235|ref|YP_847922.1| TP901 family phage tail tape measure protein [Syntrophobacter fumaroxidans MPOB]
>gi|116749926|ref|YP_846613.1| phage integrase family protein [Syntrophobacter fumaroxidans MPOB]
>gi|116747518|ref|YP_844205.1| phage integrase family protein [Syntrophobacter fumaroxidans MPOB]
>gi|29826921|ref|NP_821555.1| phage tail sheath protein [Streptomyces avermitilis MA-4680]
>gi|15888294|ref|NP_353975.1| phage head portal protein [Agrobacterium tumefaciens str. C58]
>gi|226945808|ref|YP_002800881.1| Phage portal protein [Azotobacter vinelandii DJ]
>gi|218694772|ref|YP_002402439.1| phage integrase [Escherichia coli 55989]
>gi|160881086|ref|YP_001560054.1| phage protein [Clostridium phytofermentans ISDg]
>gi|160878943|ref|YP_001557911.1| phage protein [Clostridium phytofermentans ISDg]
>gi|157160367|ref|YP_001457685.1| phage late control gene D protein [Escherichia coli HS]
>gi|157160342|ref|YP_001457660.1| PBSX family phage portal protein [Escherichia coli HS]
>gi|150391714|ref|YP_001321763.1| phi13 family phage major tail protein [Alkaliphilus metalliredigens QYMF]
>gi|150389740|ref|YP_001319789.1| TP901 family phage tail tape measure protein [Alkaliphilus metalliredigens QYMF]
>gi|150389384|ref|YP_001319433.1| phage integrase family protein [Alkaliphilus metalliredigens QYMF]
>gi|150389383|ref|YP_001319432.1| phage integrase family protein [Alkaliphilus metalliredigens QYMF]
>gi|134045675|ref|YP_001097161.1| phage integrase family protein [Methanococcus maripaludis C5]
>gi|121593231|ref|YP_985127.1| phage integrase family protein [Acidovorax sp. JS42]
>gi|117926179|ref|YP_866796.1| phage terminase GpA [Magnetococcus sp. MC-1]
>gi|117926102|ref|YP_866719.1| phage terminase GpA [Magnetococcus sp. MC-1]
>gi|117926030|ref|YP_866647.1| phage terminase GpA [Magnetococcus sp. MC-1]
>gi|117925867|ref|YP_866484.1| phage terminase GpA [Magnetococcus sp. MC-1]
>gi|117925340|ref|YP_865957.1| phage terminase GpA [Magnetococcus sp. MC-1]
>gi|117924622|ref|YP_865239.1| phage terminase GpA [Magnetococcus sp. MC-1]
>gi|117924557|ref|YP_865174.1| phage terminase GpA [Magnetococcus sp. MC-1]
>gi|110799190|ref|YP_696029.1| HK97 family phage portal protein [Clostridium perfringens ATCC 13124]
>gi|104783154|ref|YP_609652.1| phage protein [Pseudomonas entomophila L48]
>gi|83716197|ref|YP_439549.1| PBSX family phage portal protein [Burkholderia thailandensis E264]
>gi|83649378|ref|YP_437813.1| PBSX family phage portal protein [Hahella chejuensis KCTC 2396]
>gi|83647245|ref|YP_435680.1| HK97 family phage portal protein [Hahella chejuensis KCTC 2396]
>gi|83643298|ref|YP_431733.1| PBSX family phage portal protein [Hahella chejuensis KCTC 2396]
>gi|66046016|ref|YP_235857.1| Phage tail tape measure protein lambda [Pseudomonas syringae pv. syringae B728a]
>gi|52079728|ref|YP_078519.1| phage related protein [Bacillus licheniformis ATCC 14580]
>gi|17987632|ref|NP_540266.1| Phage portal protein [Brucella melitensis bv. 1 str. 16M]
>gi|254793896|ref|YP_003078733.1| phage capsid protein [Escherichia coli O157:H7 str. TW14359]
>gi|254793878|ref|YP_003078715.1| phage tail fiber protein [Escherichia coli O157:H7 str. TW14359]
>gi|254793868|ref|YP_003078705.1| phage protein D [Escherichia coli O157:H7 str. TW14359]
>gi|218690216|ref|YP_002398428.1| phage portal protein [Escherichia coli ED1a]
>gi|218690145|ref|YP_002398357.1| Phage late control gene D protein (GpD) [Escherichia coli ED1a]
>gi|218689459|ref|YP_002397671.1| phage portal protein [Escherichia coli ED1a]
>gi|218689231|ref|YP_002397443.1| phage portal protein, HK97 family [Escherichia coli ED1a]
>gi|170717380|ref|YP_001784486.1| TP901 family phage tail tape measure protein [Haemophilus somnus 2336]
>gi|170717350|ref|YP_001784459.1| phage integrase family protein [Haemophilus somnus 2336]
>gi|162138445|ref|YP_540582.2| phage shock protein operon transcriptional activator [Escherichia coli UTI89]
>gi|161486498|ref|NP_836994.2| phage shock protein operon transcriptional activator [Shigella flexneri 2a str. 2457T]
>gi|161486235|ref|NP_753677.2| phage shock protein operon transcriptional activator [Escherichia coli CFT073]
>gi|157159388|ref|YP_001462358.1| phage integrase family protein [Escherichia coli E24377A]
>gi|157157141|ref|YP_001462517.1| phage integrase family site specific recombinase [Escherichia coli E24377A]
>gi|157155788|ref|YP_001462119.1| phage late control gene D protein [Escherichia coli E24377A]
>gi|256826716|ref|YP_003150675.1| phage tail tape measure protein, TP901 family [Cryptobacterium curtum DSM 15641]
>gi|256379637|ref|YP_003103297.1| phage tail tape measure protein, TP901 family [Actinosynnema mirum DSM 43827]
>gi|256369025|ref|YP_003106533.1| phage portal protein, HK97 family [Brucella microti CCM 4915]
>gi|254555671|ref|YP_003062088.1| phage portal protein, HK97 family [Lactobacillus plantarum JDM1]
>gi|253774232|ref|YP_003037063.1| phage tail tape measure protein, lambda family [Escherichia coli BL21-Gold(DE3)pLysS AG]
>gi|241196621|ref|YP_002970176.1| HK97 family phage prohead protease [Bifidobacterium animalis subsp. lactis DSM 10140]
>gi|241191215|ref|YP_002968609.1| HK97 family phage prohead protease [Bifidobacterium animalis subsp. lactis Bl-04]
>gi|237795137|ref|YP_002862689.1| phage portal protein, HK97 family [Clostridium botulinum Ba4 str. 657]
>gi|237794638|ref|YP_002862190.1| phage portal protein, HK97 family [Clostridium botulinum Ba4 str. 657]
>gi|229915775|ref|YP_002884421.1| phage tail tape measure protein, TP901 family [Exiguobacterium sp. AT1b]
>gi|226305385|ref|YP_002765343.1| phage portal protein [Rhodococcus erythropolis PR4]
>gi|225870212|ref|YP_002746159.1| phage portal protein [Streptococcus equi subsp. equi 4047]
>gi|225863970|ref|YP_002749348.1| phage portal protein, HK97 family [Bacillus cereus 03BB102]
>gi|225863815|ref|YP_002749193.1| phage portal protein, HK97 family [Bacillus cereus 03BB102]
>gi|225855786|ref|YP_002737297.1| phage portal protein, HK97 family [Streptococcus pneumoniae P1031]
>gi|225630677|ref|YP_002727468.1| phage portal protein, HK97 family [Wolbachia sp. wRi]
>gi|221638882|ref|YP_002525144.1| Phage portal protein, HK97 family [Rhodobacter sphaeroides KD131]
>gi|218901724|ref|YP_002449558.1| phage portal protein, HK97 family [Bacillus cereus AH820]
>gi|218898921|ref|YP_002447332.1| phage portal protein, HK97 family [Bacillus cereus G9842]
>gi|218897607|ref|YP_002446018.1| phage portal protein, HK97 family [Bacillus cereus G9842]
>gi|218896996|ref|YP_002445407.1| phage portal protein, HK97 family [Bacillus cereus G9842]
>gi|218235929|ref|YP_002367331.1| phage portal protein, HK97 family [Bacillus cereus B4264]
>gi|218231322|ref|YP_002367341.1| phage tail tape measure protein, family [Bacillus cereus B4264]
>gi|217977693|ref|YP_002361840.1| phage tail tape measure protein, TP901 family [Methylocella silvestris BL2]
>gi|217973779|ref|YP_002358530.1| phage replication protein O [Shewanella baltica OS223]
>gi|217961373|ref|YP_002339941.1| phage portal protein, HK97 family [Bacillus cereus AH187]
>gi|217959639|ref|YP_002338191.1| phage portal protein, HK97 family [Bacillus cereus AH187]
>gi|217958119|ref|YP_002336663.1| phage portal protein, HK97 family [Bacillus cereus AH187]
>gi|213692682|ref|YP_002323268.1| phage structural protein [Bifidobacterium longum subsp. infantis ATCC 15697]
>gi|213692678|ref|YP_002323264.1| phage Terminase [Bifidobacterium longum subsp. infantis ATCC 15697]
>gi|213691872|ref|YP_002322458.1| phage integrase family protein [Bifidobacterium longum subsp. infantis ATCC 15697]
>gi|213691405|ref|YP_002321991.1| phage integrase family protein [Bifidobacterium longum subsp. infantis ATCC 15697]
>gi|213691366|ref|YP_002321952.1| phage integrase family protein [Bifidobacterium longum subsp. infantis ATCC 15697]
>gi|209919042|ref|YP_002293126.1| phage capsid portal protein [Escherichia coli SE11]
>gi|209885729|ref|YP_002289586.1| phage portal protein, HK97 family [Oligotropha carboxidovorans OM5]
>gi|209885289|ref|YP_002289146.1| phage portal protein, HK97 family [Oligotropha carboxidovorans OM5]
>gi|209548746|ref|YP_002280663.1| phage terminase, large subunit, PBSX family [Rhizobium leguminosarum bv. trifolii WSM2304]
>gi|209398874|ref|YP_002271326.1| phage late control gene D protein [Escherichia coli O157:H7 str. EC4115]
>gi|209398624|ref|YP_002269968.1| phage integrase family protein [Escherichia coli O157:H7 str. EC4115]
>gi|209398502|ref|YP_002271466.1| site-specific recombinase, phage integrase family [Escherichia coli O157:H7 str. EC4115]
>gi|209398107|ref|YP_002270188.1| site-specific recombinase, phage integrase family [Escherichia coli O157:H7 str. EC4115]
>gi|209397356|ref|YP_002270249.1| site-specific recombinase, phage integrase family [Escherichia coli O157:H7 str. EC4115]
>gi|209397035|ref|YP_002271353.1| phage portal protein, pbsx family [Escherichia coli O157:H7 str. EC4115]
>gi|206579535|ref|YP_002239188.1| phage portal protein, HK97 family [Klebsiella pneumoniae 342]
>gi|197118927|ref|YP_002139354.1| phage protein D [Geobacter bemidjiensis Bem]
>gi|194364668|ref|YP_002027278.1| phage tail protein I [Stenotrophomonas maltophilia R551-3]
>gi|194364662|ref|YP_002027272.1| phage tail tape measure protein, TP901 family [Stenotrophomonas maltophilia R551-3]
>gi|192289116|ref|YP_001989721.1| phage tail protein I [Rhodopseudomonas palustris TIE-1]
>gi|189023810|ref|YP_001934578.1| Phage portal protein, HK97 family [Brucella abortus S19]
>gi|188590103|ref|YP_001920931.1| N- phage replisome organiser [Clostridium botulinum E3 str. Alaska E43]
>gi|188589395|ref|YP_001921289.1| N- phage replisome organiser [Clostridium botulinum E3 str. Alaska E43]
>gi|188588312|ref|YP_001921499.1| phage portal protein, HK97 family [Clostridium botulinum E3 str. Alaska E43]
>gi|188577618|ref|YP_001914547.1| phage portal protein, pbsx family [Xanthomonas oryzae pv. oryzae PXO99A]
>gi|187935010|ref|YP_001886904.1| phage tail fiber domain protein [Clostridium botulinum B str. Eklund 17B]
>gi|187933457|ref|YP_001886448.1| phage portal protein, HK97 family [Clostridium botulinum B str. Eklund 17B]
>gi|187933266|ref|YP_001885145.1| phage portal protein, HK97 family [Clostridium botulinum B str. Eklund 17B]
>gi|184154948|ref|YP_001843288.1| phage portal protein [Lactobacillus fermentum IFO 3956]
>gi|184153716|ref|YP_001842057.1| phage portal protein [Lactobacillus reuteri JCM 1112]
>gi|184153300|ref|YP_001841641.1| phage portal protein [Lactobacillus reuteri JCM 1112]
>gi|183983585|ref|YP_001851876.1| phage integrase [Mycobacterium marinum M]
>gi|182681713|ref|YP_001829873.1| lambda family phage portal protein [Xylella fastidiosa M23]
>gi|170760139|ref|YP_001786832.1| HK97 family phage portal protein [Clostridium botulinum A3 str. Loch Maree]
>gi|170754696|ref|YP_001782121.1| HK97 family phage portal protein [Clostridium botulinum B1 str. Okra]
>gi|170751555|ref|YP_001757815.1| TP901 family phage tail tape measure protein [Methylobacterium radiotolerans JCM 2831]
>gi|170728336|ref|YP_001762362.1| phage integrase family protein [Shewanella woodyi ATCC 51908]
>gi|170684127|ref|YP_001743032.1| HK97 family phage portal protein [Escherichia coli SMS-3-5]
>gi|170683855|ref|YP_001746294.1| TP901 family phage tail tape measure protein [Escherichia coli SMS-3-5]
>gi|170683575|ref|YP_001746267.1| PBSX family phage portal protein [Escherichia coli SMS-3-5]
>gi|170682704|ref|YP_001743249.1| HK97 family phage portal protein [Escherichia coli SMS-3-5]
>gi|170682551|ref|YP_001746296.1| phage late control gene D protein [Escherichia coli SMS-3-5]
>gi|167630980|ref|YP_001681479.1| phage portal protein, hk97 family [Heliobacterium modesticaldum Ice1]
>gi|167630903|ref|YP_001681402.1| phage portal protein, hk97 family [Heliobacterium modesticaldum Ice1]
>gi|167623268|ref|YP_001673562.1| TP901 family phage tail tape measure protein [Shewanella halifaxensis HAW-EB4]
>gi|163842864|ref|YP_001627268.1| HK97 family phage portal protein [Brucella suis ATCC 23445]
>gi|161618561|ref|YP_001592448.1| HK97 family phage portal protein [Brucella canis ATCC 23365]
>gi|160875492|ref|YP_001554808.1| phage integrase family protein [Shewanella baltica OS195]
>gi|160873927|ref|YP_001553243.1| phage integrase family protein [Shewanella baltica OS195]
>gi|160873919|ref|YP_001553235.1| TP901 family phage tail tape measure protein [Shewanella baltica OS195]
>gi|159904473|ref|YP_001548135.1| TP901 family phage tail tape measure protein [Methanococcus maripaludis C6]
>gi|157377381|ref|YP_001475981.1| phage integrase [Shewanella sediminis HAW-EB3]
>gi|157377375|ref|YP_001475975.1| phage integrase [Shewanella sediminis HAW-EB3]
>gi|157375381|ref|YP_001473981.1| phage integrase family protein [Shewanella sediminis HAW-EB3]
>gi|154150265|ref|YP_001403883.1| phage integrase family protein [Candidatus Methanoregula boonei 6A8]
>gi|153955260|ref|YP_001396025.1| Phage portal protein [Clostridium kluyveri DSM 555]
>gi|153940986|ref|YP_001392482.1| HK97 family phage portal protein [Clostridium botulinum F str. Langeland]
>gi|153940716|ref|YP_001391157.1| HK97 family phage portal protein [Clostridium botulinum F str. Langeland]
>gi|153932756|ref|YP_001384752.1| HK97 family phage portal protein [Clostridium botulinum A str. ATCC 19397]
>gi|153930816|ref|YP_001385268.1| HK97 family phage portal protein [Clostridium botulinum A str. ATCC 19397]
>gi|153009637|ref|YP_001370852.1| phage terminase GpA [Ochrobactrum anthropi ATCC 49188]
>gi|153009120|ref|YP_001370335.1| phage integrase family protein [Ochrobactrum anthropi ATCC 49188]
>gi|153009109|ref|YP_001370324.1| phage terminase GpA [Ochrobactrum anthropi ATCC 49188]
>gi|153008837|ref|YP_001370052.1| phage terminase GpA [Ochrobactrum anthropi ATCC 49188]
>gi|153008819|ref|YP_001370034.1| TP901 family phage tail tape measure protein [Ochrobactrum anthropi ATCC 49188]
>gi|152999294|ref|YP_001364975.1| lambda family phage portal protein [Shewanella baltica OS185]
>gi|152999292|ref|YP_001364973.1| phage terminase GpA [Shewanella baltica OS185]
>gi|152994609|ref|YP_001339444.1| TP901 family phage tail tape measure protein [Marinomonas sp. MWYL1]
>gi|152988525|ref|YP_001350488.1| HK97 family phage portal protein [Pseudomonas aeruginosa PA7]
>gi|151222110|ref|YP_001332932.1| phage portal protein [Staphylococcus aureus subsp. aureus str. Newman]
>gi|150401647|ref|YP_001325413.1| phage integrase family protein [Methanococcus aeolicus Nankai-3]
>gi|150400371|ref|YP_001324138.1| phage integrase family protein [Methanococcus vannielii SB]
>gi|150399016|ref|YP_001322783.1| phage integrase family protein [Methanococcus vannielii SB]
>gi|148245176|ref|YP_001219869.1| phage portal protein [Clostridium kluyveri DSM 555]
>gi|146313114|ref|YP_001178188.1| TP901 family phage tail tape measure protein [Enterobacter sp. 638]
>gi|146311306|ref|YP_001176380.1| phage integrase family protein [Enterobacter sp. 638]
>gi|145300716|ref|YP_001143557.1| phage capsid portal protein [Aeromonas salmonicida subsp. salmonicida A449]
>gi|145298583|ref|YP_001141424.1| phage capsid portal protein [Aeromonas salmonicida subsp. salmonicida A449]
>gi|134299066|ref|YP_001112562.1| phage terminase GpA [Desulfotomaculum reducens MI-1]
>gi|134298655|ref|YP_001112151.1| phage integrase family protein [Desulfotomaculum reducens MI-1]
>gi|126175796|ref|YP_001051945.1| phage terminase GpA [Shewanella baltica OS155]
>gi|126175794|ref|YP_001051943.1| lambda family phage portal protein [Shewanella baltica OS155]
>gi|126175787|ref|YP_001051936.1| TP901 family phage tail tape measure protein [Shewanella baltica OS155]
>gi|126173536|ref|YP_001049685.1| TP901 family phage tail tape measure protein [Shewanella baltica OS155]
>gi|126090281|ref|YP_001041736.1| phage integrase family protein [Shewanella baltica OS155]
>gi|121611464|ref|YP_999271.1| phage integrase family protein [Verminephrobacter eiseniae EF01-2]
>gi|121606322|ref|YP_983651.1| phage integrase family protein [Polaromonas naphthalenivorans CJ2]
>gi|120603820|ref|YP_968220.1| phage integrase family protein [Desulfovibrio vulgaris subsp. vulgaris DP4]
>gi|120603607|ref|YP_968007.1| phage integrase family protein [Desulfovibrio vulgaris subsp. vulgaris DP4]
>gi|120602532|ref|YP_966932.1| phage integrase family protein [Desulfovibrio vulgaris subsp. vulgaris DP4]
>gi|120602210|ref|YP_966610.1| phage integrase family protein [Desulfovibrio vulgaris subsp. vulgaris DP4]
>gi|120601140|ref|YP_965540.1| phage integrase family protein [Desulfovibrio vulgaris subsp. vulgaris DP4]
>gi|120586881|ref|YP_961226.1| phage integrase family protein [Desulfovibrio vulgaris subsp. vulgaris DP4]
>gi|120554435|ref|YP_958786.1| TP901 family phage tail tape measure protein [Marinobacter aquaeolei VT8]
>gi|118578673|ref|YP_899923.1| phage integrase domain/SAM domain-containing protein [Pelobacter propionicus DSM 2379]
>gi|118577353|ref|YP_899593.1| phage integrase family protein [Pelobacter propionicus DSM 2379]
>gi|117624865|ref|YP_853778.1| phage portal protein [Escherichia coli APEC O1]
>gi|117624287|ref|YP_853200.1| Phage protein Q [Escherichia coli APEC O1]
>gi|117624285|ref|YP_853198.1| phage related tail protein [Escherichia coli APEC O1]
>gi|117624283|ref|YP_853196.1| phage protein D [Escherichia coli APEC O1]
>gi|114570821|ref|YP_757501.1| phage integrase family protein [Maricaulis maris MCS10]
>gi|109897023|ref|YP_660278.1| phage capsid scaffolding [Pseudoalteromonas atlantica T6c]
>gi|92118781|ref|YP_578510.1| phage late control D [Nitrobacter hamburgensis X14]
>gi|92118013|ref|YP_577742.1| Phage portal protein, HK97 [Nitrobacter hamburgensis X14]
>gi|92117894|ref|YP_577623.1| phage late control D [Nitrobacter hamburgensis X14]
>gi|92117556|ref|YP_577285.1| phage portal protein [Nitrobacter hamburgensis X14]
>gi|92117264|ref|YP_576993.1| Phage portal protein, HK97 [Nitrobacter hamburgensis X14]
>gi|307143781|ref|ZP_07502213.1| phage tail fiber protein [Escherichia coli M605]
>gi|297585263|ref|YP_003701043.1| TP901 family phage tail tape measure protein [Bacillus selenitireducens MLS10]
>gi|297583116|ref|YP_003698896.1| TP901 family phage tail tape measure protein [Bacillus selenitireducens MLS10]
>gi|298346518|ref|YP_003719205.1| HK97 family phage portal protein [Mobiluncus curtisii ATCC 43063]
>gi|296503171|ref|YP_003664871.1| phage portal protein HK97 [Bacillus thuringiensis BMB171]
>gi|259908702|ref|YP_002649058.1| Phage portal protein [Erwinia pyrifoliae Ep1/96]
>gi|116662305|ref|YP_829359.1| phage integrase family protein [Arthrobacter sp. FB24]
>gi|304443243|ref|YP_003857073.1| head protein [Staphylococcus phage SAP-26]
>gi|300710813|ref|YP_003736627.1| phage tail tape measure protein, TP901 family [Halalkalicoccus jeotgali B3]
>gi|81299564|ref|YP_399772.1| phage late control gene D protein GPD [Synechococcus elongatus PCC 7942]
>gi|146279095|ref|YP_001169254.1| phage integrase family protein [Rhodobacter sphaeroides ATCC 17025]
>gi|146278755|ref|YP_001168914.1| phage integrase family protein [Rhodobacter sphaeroides ATCC 17025]
>gi|146277760|ref|YP_001167919.1| phage integrase family protein [Rhodobacter sphaeroides ATCC 17025]
>gi|146276881|ref|YP_001167040.1| phage integrase family protein [Rhodobacter sphaeroides ATCC 17025]
>gi|146276876|ref|YP_001167035.1| phage integrase family protein [Rhodobacter sphaeroides ATCC 17025]
>gi|146276197|ref|YP_001166356.1| phage integrase family protein [Rhodobacter sphaeroides ATCC 17025]
>gi|300715695|ref|YP_003740498.1| Phage late control D family protein [Erwinia billingiae Eb661]
>gi|300715670|ref|YP_003740473.1| Phage portal protein [Erwinia billingiae Eb661]
>gi|288958876|ref|YP_003449217.1| phage portal protein [Azospirillum sp. B510]
>gi|288957682|ref|YP_003448023.1| phage portal protein [Azospirillum sp. B510]
>gi|302385178|ref|YP_003821000.1| phage tail tape measure protein, TP901 family [Clostridium saccharolyticum WM1]
>gi|302189638|ref|ZP_07266311.1| phage tail tape measure protein [Pseudomonas syringae pv. syringae 642]
>gi|300088716|ref|YP_003759238.1| phage tail protein [Dehalogenimonas lykanthroporepellens BL-DC-9]
>gi|300022752|ref|YP_003755363.1| phage tail tape measure protein, TP901 family [Hyphomicrobium denitrificans ATCC 51888]
>gi|294677849|ref|YP_003578464.1| HK97 family phage portal protein [Rhodobacter capsulatus SB 1003]
>gi|294677521|ref|YP_003578136.1| HK97 family phage portal protein [Rhodobacter capsulatus SB 1003]
>gi|294677221|ref|YP_003577836.1| HK97 family phage portal protein [Rhodobacter capsulatus SB 1003]
>gi|82699482|ref|YP_414056.1| HK97 family phage portal protein [Brucella melitensis biovar Abortus 2308]
>gi|99081169|ref|YP_613323.1| phage integrase [Ruegeria sp. TM1040]
>gi|99081143|ref|YP_613297.1| phage terminase GpA [Ruegeria sp. TM1040]
>gi|27363569|ref|NP_759097.1| Phage protein D [Vibrio vulnificus CMCP6]
>gi|284802729|ref|YP_003414594.1| phage tail tape measure protein, TP901 family [Listeria monocytogenes 08-5578]
>gi|296126191|ref|YP_003633443.1| phage terminase, large subunit, PBSX family [Brachyspira murdochii DSM 12563]
>gi|296104733|ref|YP_003614879.1| phage late control D family protein [Enterobacter cloacae subsp. cloacae ATCC 13047]
>gi|296103196|ref|YP_003613342.1| phage portal protein [Enterobacter cloacae subsp. cloacae ATCC 13047]
>gi|296102018|ref|YP_003612164.1| phage integrase family protein [Enterobacter cloacae subsp. cloacae ATCC 13047]
>gi|218558967|ref|YP_002391880.1| Phage late control gene D protein (GpD) [Escherichia coli S88]
>gi|218558186|ref|YP_002391099.1| phage integrase [Escherichia coli S88]
>gi|218558019|ref|YP_002390932.1| phage integrase [Escherichia coli S88]
>gi|261402688|ref|YP_003246912.1| phage tail tape measure protein, TP901 family [Methanocaldococcus vulcanius M7]
>gi|148559308|ref|YP_001258584.1| HK97 family phage portal protein [Brucella ovis ATCC 25840]
>gi|238028254|ref|YP_002912485.1| Phage late control D family protein [Burkholderia glumae BGR1]
>gi|238027358|ref|YP_002911589.1| Phage protein D [Burkholderia glumae BGR1]
>gi|238025824|ref|YP_002910055.1| Gp5, phage portal protein, pbsx family protein [Burkholderia glumae BGR1]
>gi|284995871|ref|YP_003417639.1| phage tail tape measure protein, TP901 family [Listeria monocytogenes 08-5923]
>gi|226949980|ref|YP_002805071.1| phage portal protein, HK97 family [Clostridium botulinum A2 str. Kyoto]
>gi|226949138|ref|YP_002804229.1| phage portal protein, HK97 family [Clostridium botulinum A2 str. Kyoto]
>gi|226948756|ref|YP_002803847.1| phage portal protein, HK97 family [Clostridium botulinum A2 str. Kyoto]
>gi|220903534|ref|YP_002478846.1| phage tail tape measure protein, TP901 family [Desulfovibrio desulfuricans subsp. desulfuricans str. ATCC 27774]
>gi|294102101|ref|YP_003553959.1| phage tail tape measure protein, TP901 family [Aminobacterium colombiense DSM 12261]
>gi|147671436|ref|YP_001215894.1| PBSX family phage portal protein [Vibrio cholerae O395]
>gi|77359387|ref|YP_338962.1| phage integrase [Pseudoalteromonas haloplanktis TAC125]
>gi|75675820|ref|YP_318241.1| Phage portal protein, HK97 [Nitrobacter winogradskyi Nb-255]
>gi|75675736|ref|YP_318157.1| Phage portal protein, HK97 [Nitrobacter winogradskyi Nb-255]
>gi|75675677|ref|YP_318098.1| Phage portal protein, HK97 [Nitrobacter winogradskyi Nb-255]
>gi|75675354|ref|YP_317775.1| Phage portal protein, HK97 [Nitrobacter winogradskyi Nb-255]
>gi|29028605|ref|NP_803295.1| tape measure protein [Staphylococcus phage 11]
>gi|29028597|ref|NP_803287.1| head protein [Staphylococcus phage 11]
>gi|92113526|ref|YP_573454.1| Phage portal protein, PBSX [Chromohalobacter salexigens DSM 3043]
>gi|92113498|ref|YP_573426.1| phage late control D [Chromohalobacter salexigens DSM 3043]
>gi|91976443|ref|YP_569102.1| Phage portal protein, HK97 [Rhodopseudomonas palustris BisB5]
>gi|78485001|ref|YP_390926.1| Phage integrase [Thiomicrospira crunogena XCL-2]
>gi|189427073|ref|YP_001950172.1| recombination endonuclease like protein [Ralstonia phage RSL1]
>gi|189427068|ref|YP_001950167.1| RecD like protein [Ralstonia phage RSL1]
>gi|189427035|ref|YP_001950134.1| DNA polymerase I [Ralstonia phage RSL1]
>gi|189427010|ref|YP_001950109.1| deoxyuridylate hydroxymethyltransferase [Ralstonia phage RSL1]
>gi|189426939|ref|YP_001950038.1| SbcC like protein [Ralstonia phage RSL1]
>gi|189426885|ref|YP_001949984.1| homospermidine synthase [Ralstonia phage RSL1]
>gi|189426883|ref|YP_001949982.1| topoisomerase IB [Ralstonia phage RSL1]
>gi|189426879|ref|YP_001949978.1| bifunctional NMN adenylyltransferase [Ralstonia phage RSL1]
>gi|189426877|ref|YP_001949976.1| TRAP transporter solute receptor like protein [Ralstonia phage RSL1]
>gi|189426867|ref|YP_001949966.1| ATPase [Ralstonia phage RSL1]
>gi|189426842|ref|YP_001949941.1| NAD-dependent DNA ligase [Ralstonia phage RSL1]
>gi|189426829|ref|YP_001949928.1| glutathionylspermidine synthase [Ralstonia phage RSL1]
>gi|146329955|ref|YP_001210263.1| BcepGomrgp43 [Burkholderia phage BcepGomr]
>gi|146329931|ref|YP_001210239.1| BcepGomrgp19 [Burkholderia phage BcepGomr]
>gi|146329929|ref|YP_001210237.1| BcepGomrgp17 [Burkholderia phage BcepGomr]
>gi|9630755|ref|NP_047359.1| maturation protein [Enterobacteria phage If1]
>gi|9630752|ref|NP_047356.1| attachment protein [Enterobacteria phage If1]
>gi|9626242|ref|NP_040579.1| G IV protein [Enterobacteria phage Ike]
>gi|9626233|ref|NP_040570.1| G II protein [Enterobacteria phage Ike]
>gi|283787229|ref|YP_003367094.1| phage tail protein [Citrobacter rodentium ICC168]
>gi|283785674|ref|YP_003365539.1| phage tail protein [Citrobacter rodentium ICC168]
>gi|269203618|ref|YP_003282887.1| phage portal protein, HK97 family [Staphylococcus aureus subsp. aureus ED98]
>gi|269202511|ref|YP_003281780.1| phage portal protein, HK97 family [Staphylococcus aureus subsp. aureus ED98]
>gi|284162583|ref|YP_003401206.1| phage tail tape measure protein, TP901 family [Archaeoglobus profundus DSM 5631]
>gi|269119880|ref|YP_003308057.1| phage terminase, large subunit, PBSX family [Sebaldella termitidis ATCC 33386]
>gi|269119494|ref|YP_003307671.1| phage tail tape measure protein, TP901 family [Sebaldella termitidis ATCC 33386]
>gi|262194147|ref|YP_003265356.1| phage tail tape measure protein, TP901 family [Haliangium ochraceum DSM 14365]
>gi|262193974|ref|YP_003265183.1| phage tail tape measure protein, TP901 family [Haliangium ochraceum DSM 14365]
>gi|289675350|ref|ZP_06496240.1| HK97 family phage portal protein [Pseudomonas syringae pv. syringae FF5]
>gi|289581940|ref|YP_003480406.1| phage shock protein A, PspA [Natrialba magadii ATCC 43099]
>gi|281416482|ref|YP_003347402.1| tail tape measure protein [Enterococcus phage phiFL4A]
>gi|288559545|ref|YP_003423031.1| phage portal protein [Methanobrevibacter ruminantium M1]
>gi|239507400|ref|YP_002939711.1| portal protein [Staphylococcus phage phiPVL-CN125]
>gi|281416400|ref|YP_003347424.1| tail component protein [Streptococcus phage Abc2]
>gi|281416389|ref|YP_003347413.1| portal protein [Streptococcus phage Abc2]
>gi|273809744|ref|YP_003344863.1| tail protein [Streptococcus phage ALQ13.2]
>gi|273809731|ref|YP_003344850.1| capsid [Streptococcus phage ALQ13.2]
>gi|119953785|ref|YP_950590.1| head protein [Streptococcus phage SMP]
>gi|268609012|ref|ZP_06142739.1| phage protein [Ruminococcus flavefaciens FD-1]
>gi|257142678|ref|ZP_05590940.1| PBSX family phage portal protein [Burkholderia thailandensis E264]
>gi|257142655|ref|ZP_05590917.1| Phage tail sheath protein [Burkholderia thailandensis E264]
>gi|255652314|ref|ZP_05399216.1| phage protein [Clostridium difficile QCD-37x79]
>gi|255520629|ref|ZP_05387866.1| phage portal protein, HK97 family [Listeria monocytogenes FSL J1-175]
>gi|255103094|ref|ZP_05332071.1| phage protein [Clostridium difficile QCD-63q42]
>gi|254991946|ref|ZP_05274136.1| phage portal protein, HK97 family [Listeria monocytogenes FSL J2-064]
>gi|119714097|ref|YP_919239.1| phage integrase family protein [Nocardioides sp. JS614]
>gi|238801682|ref|YP_002922738.1| gp66 [Burkholderia phage BcepIL02]
>gi|238801679|ref|YP_002922735.1| gp63 [Burkholderia phage BcepIL02]
>gi|238801666|ref|YP_002922722.1| gp50 [Burkholderia phage BcepIL02]
>gi|238801663|ref|YP_002922719.1| gp47 [Burkholderia phage BcepIL02]
>gi|238801642|ref|YP_002922698.1| gp26 [Burkholderia phage BcepIL02]
>gi|238801619|ref|YP_002922675.1| gp03 [Burkholderia phage BcepIL02]
>gi|32469471|ref|NP_862879.1| gp40 [Streptococcus phage SM1]
>gi|168229293|ref|YP_001686814.1| orf20 [Streptococcus phage 858]
>gi|168229280|ref|YP_001686801.1| orf7 [Streptococcus phage 858]
>gi|163937913|ref|YP_001642799.1| TP901 family phage tail tape measure protein [Bacillus weihenstephanensis KBAB4]
>gi|155042935|ref|YP_001425602.1| Phage portal protein [Bacillus virus 1]
>gi|108802538|ref|YP_642734.1| phage integrase [Mycobacterium sp. MCS]
>gi|91214212|ref|NP_918997.2| terminase large subunit TerL [Burkholderia phage BcepNazgul]
>gi|77864678|ref|YP_355388.1| gp53 [Burkholderia phage Bcep176]
>gi|77020214|ref|YP_338146.1| tail component protein [Bacillus phage Cherry]
>gi|77020197|ref|YP_338145.1| tail tape measure protein [Bacillus phage Cherry]
>gi|34610170|ref|NP_918995.1| portal protein Lambda B [Burkholderia phage BcepNazgul]
>gi|29028708|ref|NP_803396.1| tail length tape measure protein [Staphylococcus phage phi13]
>gi|13095722|ref|NP_076614.1| portal protein [Lactococcus phage bIL285]
>gi|227329895|ref|ZP_03833919.1| PBSX family phage portal protein [Pectobacterium carotovorum subsp. carotovorum WPP14]
>gi|33770511|ref|NP_892048.1| portal protein [Yersinia phage PY54]
>gi|12719453|ref|NP_075524.1| LukF-PV [Staphylococcus phage phiSLT]
>gi|12719452|ref|NP_075523.1| LukS-PV [Staphylococcus phage phiSLT]
>gi|12719451|ref|NP_075522.1| amidase [Staphylococcus phage phiSLT]
>gi|168983485|ref|YP_001687525.1| lysin [Lactococcus phage asccphi28]
>gi|149882916|ref|YP_001294853.1| head protein [Burkholderia phage BcepNY3]
>gi|148727199|ref|YP_001285691.1| p22 [Xanthomonas phage Xop411]
>gi|109302764|ref|YP_654766.1| gp11 [Mycobacterium phage 244]
>gi|32128430|ref|NP_858965.1| tail lenght tape measure protein [Xanthomonas phage Xp10]
>gi|32128419|ref|NP_858954.1| head portal protein [Xanthomonas phage Xp10]
>gi|13095846|ref|NP_076736.1| portal protein [Lactococcus phage bIL309]
>gi|9630321|ref|NP_046752.1| replicase [Enterobacteria phage Qbeta]
>gi|9629535|ref|NP_044823.1| connector protein [Streptococcus phage Cp-1]
>gi|9626315|ref|NP_040650.1| rna replicase beta chain [Enterobacteria phage MS2]
>gi|118430767|ref|YP_873992.1| head protein [Staphylococcus phage phiNM]
>gi|77020161|ref|YP_338197.1| tail component protein [Bacillus phage Gamma]
>gi|77020143|ref|YP_338196.1| tail tape measure protein [Bacillus phage Gamma]
>gi|213620986|ref|ZP_03373769.1| phage capsid portal protein [Salmonella enterica subsp. enterica serovar Typhi str. E98-2068]
>gi|169257279|ref|YP_001700655.1| bacteriophage DNA replication protein; Lambda gpo homolog [Phage Gifsy-2]
>gi|169257232|ref|YP_001700609.1| bacteriophage prohead protease; Lambda gpC homolog [Phage Gifsy-1]
>gi|182637552|ref|YP_001828723.1| structural protein [Lactococcus phage 1706]
>gi|182637498|ref|YP_001828669.1| structural protein [Lactococcus phage 1706]
>gi|182637497|ref|YP_001828668.1| structural protein [Lactococcus phage 1706]
>gi|182637484|ref|YP_001828655.1| structural protein [Lactococcus phage 1706]
>gi|307349759|ref|ZP_07619364.1| phage integrase [Escherichia coli TA280]
>gi|302187933|ref|ZP_07264606.1| site-specific recombinase, phage integrase family protein [Pseudomonas syringae pv. syringae 642]
>gi|289676204|ref|ZP_06497094.1| Phage tail tape measure protein TP901, core region [Pseudomonas syringae pv. syringae FF5]
>gi|289650812|ref|ZP_06482155.1| Phage tail tape measure protein TP901, core region [Pseudomonas syringae pv. aesculi str. 2250]
>gi|289646876|ref|ZP_06478219.1| phage integrase family site specific recombinase [Pseudomonas syringae pv. aesculi str. 2250]
>gi|289628910|ref|ZP_06461864.1| phage integrase family site specific recombinase [Pseudomonas syringae pv. aesculi str. NCPPB3681]
>gi|289623582|ref|ZP_06456536.1| Phage tail tape measure protein TP901, core region [Pseudomonas syringae pv. aesculi str. NCPPB3681]
>gi|257483929|ref|ZP_05637970.1| Phage integrase [Pseudomonas syringae pv. tabaci ATCC 11528]
>gi|71725297|ref|YP_272272.1| phage integrase family site specific recombinase [Pseudomonas syringae pv. phaseolicola 1448A]
>gi|71725244|ref|YP_272203.1| phage integrase family site specific recombinase [Pseudomonas syringae pv. phaseolicola 1448A]
>gi|311109887|ref|YP_003982738.1| phage integrase family protein 9 [Achromobacter xylosoxidans A8]
>gi|310823396|ref|YP_003955754.1| phage integrase [Stigmatella aurantiaca DW4/3-1]
>gi|310823313|ref|YP_003955671.1| phage integrase family protein [Stigmatella aurantiaca DW4/3-1]
>gi|310822738|ref|YP_003955096.1| phage integrase family protein [Stigmatella aurantiaca DW4/3-1]
>gi|310819905|ref|YP_003952263.1| PbsX family phage portal protein [Stigmatella aurantiaca DW4/3-1]
>gi|310819802|ref|YP_003952160.1| PbsX family phage portal protein [Stigmatella aurantiaca DW4/3-1]
>gi|310819786|ref|YP_003952144.1| phage tail sheath family protein [Stigmatella aurantiaca DW4/3-1]
>gi|310819252|ref|YP_003951610.1| phage integrase family protein [Stigmatella aurantiaca DW4/3-1]
>gi|310818817|ref|YP_003951175.1| phage tail sheath protein [Stigmatella aurantiaca DW4/3-1]
>gi|310818587|ref|YP_003950945.1| phage integrase family protein [Stigmatella aurantiaca DW4/3-1]
>gi|310818193|ref|YP_003950551.1| phage integrase family protein [Stigmatella aurantiaca DW4/3-1]
>gi|238912006|ref|ZP_04655843.1| phage terminase, large subunit, pbsx family protein [Salmonella enterica subsp. enterica serovar Tennessee str. CDC07-0191]
>gi|226364846|ref|YP_002782628.1| phage integrase family protein [Rhodococcus opacus B4]
>gi|319892860|ref|YP_004149735.1| Phage minor head protein [Staphylococcus pseudintermedius HKU10-03]
>gi|319892774|ref|YP_004149649.1| Phage minor head protein [Staphylococcus pseudintermedius HKU10-03]
>gi|308172846|ref|YP_003919551.1| phage endopeptidase [Bacillus amyloliquefaciens DSM7]
>gi|308172484|ref|YP_003919189.1| structural protein [Bacillus phage SPP1] [Bacillus amyloliquefaciens DSM7]
>gi|21910750|ref|NP_665018.1| hyaluronidase - phage associated [Streptococcus pyogenes MGAS315]
>gi|21910261|ref|NP_664529.1| hyaluronidase - phage associated [Streptococcus pyogenes MGAS315]
>gi|315038555|ref|YP_004032123.1| phage integrase family protein [Lactobacillus amylovorus GRL 1112]
>gi|251789363|ref|YP_003004084.1| phage shock protein operon transcriptional activator [Dickeya zeae Ech1591]
>gi|240851067|ref|YP_002972467.1| phage tail sheath protein FI [Bartonella grahamii as4aup]
>gi|240850473|ref|YP_002971871.1| phage portal protein [Bartonella grahamii as4aup]
>gi|240850452|ref|YP_002971848.1| phage tail sheath protein FI [Bartonella grahamii as4aup]
>gi|240849987|ref|YP_002971379.1| phage portal protein [Bartonella grahamii as4aup]
>gi|318041134|ref|ZP_07973090.1| phage integrase family protein [Synechococcus sp. CB0101]
>gi|311109520|ref|YP_003982373.1| phage integrase family protein 6 [Achromobacter xylosoxidans A8]
>gi|311108580|ref|YP_003981433.1| phage tail sheath family protein [Achromobacter xylosoxidans A8]
>gi|311107198|ref|YP_003980051.1| phage tail tape measure protein, lambda family [Achromobacter xylosoxidans A8]
>gi|311106382|ref|YP_003979235.1| phage integrase family protein 4 [Achromobacter xylosoxidans A8]
>gi|317153351|ref|YP_004121399.1| phage tail protein [Desulfovibrio aespoeensis Aspo-2]
>gi|317153336|ref|YP_004121384.1| phage tail tape measure protein, TP901 family [Desulfovibrio aespoeensis Aspo-2]
>gi|317152184|ref|YP_004120232.1| phage tail tape measure protein, TP901 family [Desulfovibrio aespoeensis Aspo-2]
>gi|317152166|ref|YP_004120214.1| phage portal protein, PBSX family [Desulfovibrio aespoeensis Aspo-2]
>gi|238921007|ref|YP_002934522.1| phage tail sheath protein [Edwardsiella ictaluri 93-146]
>gi|238920150|ref|YP_002933665.1| phage capsid scaffolding [Edwardsiella ictaluri 93-146]
>gi|238920128|ref|YP_002933643.1| site-specific recombinase, phage integrase family [Edwardsiella ictaluri 93-146]
>gi|238919727|ref|YP_002933242.1| phage shock protein operon transcriptional activator [Edwardsiella ictaluri 93-146]
>gi|317132789|ref|YP_004092103.1| phage minor structural protein [Ethanoligenens harbinense YUAN-3]
>gi|317128824|ref|YP_004095106.1| phage minor structural protein [Bacillus cellulosilyticus DSM 2522]
>gi|257470300|ref|ZP_05634391.1| phage portal protein, lambda family [Fusobacterium ulcerans ATCC 49185]
>gi|257464347|ref|ZP_05628725.1| SPP1 family phage head morphogenesis protein [Fusobacterium sp. D12]
>gi|257464320|ref|ZP_05628698.1| TP901 family phage tail tape measure protein [Fusobacterium sp. D12]
>gi|257453069|ref|ZP_05618368.1| phage protein [Fusobacterium sp. 3_1_5R]
>gi|257451517|ref|ZP_05616816.1| TP901 family phage tail tape measure protein [Fusobacterium sp. 3_1_5R]
>gi|134287636|ref|YP_001109802.1| phage integrase family protein [Burkholderia vietnamiensis G4]
>gi|115352465|ref|YP_774304.1| phage integrase family protein [Burkholderia ambifaria AMMD]
>gi|115352126|ref|YP_773965.1| phage SPO1 DNA polymerase-related protein [Burkholderia ambifaria AMMD]
>gi|115351928|ref|YP_773767.1| phage terminase GpA [Burkholderia ambifaria AMMD]
>gi|115351913|ref|YP_773752.1| phage tail collar domain-containing protein [Burkholderia ambifaria AMMD]
>gi|315452450|ref|YP_004072720.1| phage head morphogenesis protein [Helicobacter felis ATCC 49179]
>gi|317054078|ref|YP_004118103.1| phage portal protein, HK97 family [Pantoea sp. At-9b]
>gi|317048364|ref|YP_004116012.1| phage replication protein O [Pantoea sp. At-9b]
>gi|288553907|ref|YP_003425842.1| TP901 family phage tail tape measure protein [Bacillus pseudofirmus OF4]
>gi|238894359|ref|YP_002919093.1| phage shock protein operon transcriptional activator [Klebsiella pneumoniae NTUH-K2044]
>gi|197285824|ref|YP_002151696.1| phage tail fiber protein [Proteus mirabilis HI4320]
>gi|197285236|ref|YP_002151108.1| phage shock protein operon transcriptional activator [Proteus mirabilis HI4320]
>gi|197284825|ref|YP_002150697.1| phage tail protein [Proteus mirabilis HI4320]
>gi|197284418|ref|YP_002150290.1| phage tail tape measure protein [Proteus mirabilis HI4320]
>gi|197284399|ref|YP_002150271.1| phage protein [Proteus mirabilis HI4320]
>gi|190571700|ref|YP_001976058.1| Phage major tail sheath protein [Wolbachia endosymbiont of Culex quinquefasciatus Pel]
>gi|190570869|ref|YP_001975227.1| Phage major tail sheath protein [Wolbachia endosymbiont of Culex quinquefasciatus Pel]
>gi|187733910|ref|YP_001880495.1| phage tail sheath protein [Shigella boydii CDC 3083-94]
>gi|187733122|ref|YP_001880961.1| phage tail tape measure protein [Shigella boydii CDC 3083-94]
>gi|187732537|ref|YP_001880486.1| phage capsid scaffolding protein (GpO) [Shigella boydii CDC 3083-94]
>gi|187731147|ref|YP_001880142.1| phage shock protein operon transcriptional activator [Shigella boydii CDC 3083-94]
>gi|169796554|ref|YP_001714347.1| phage head morphogenesis protein [Acinetobacter baumannii AYE]
>gi|161579570|ref|NP_929821.2| phage shock protein operon transcriptional activator [Photorhabdus luminescens subsp. laumondii TTO1]
>gi|152969850|ref|YP_001334959.1| phage shock protein operon transcriptional activator [Klebsiella pneumoniae subsp. pneumoniae MGH 78578]
>gi|148379698|ref|YP_001254239.1| phage protein [Clostridium botulinum A str. ATCC 3502]
>gi|148379692|ref|YP_001254233.1| phage protein [Clostridium botulinum A str. ATCC 3502]
>gi|148241954|ref|YP_001227111.1| Phage integrase family protein [Synechococcus sp. RCC307]
>gi|148238979|ref|YP_001224366.1| Phage integrase family protein [Synechococcus sp. WH 7803]
>gi|134094747|ref|YP_001099822.1| IKe filamentous prophage; protein involved in phage assembly [Herminiimonas arsenicoxydans]
>gi|126700538|ref|YP_001089435.1| phage protein [Clostridium difficile 630]
>gi|126700528|ref|YP_001089425.1| phage protein [Clostridium difficile 630]
>gi|126698536|ref|YP_001087433.1| phage protein [Clostridium difficile 630]
>gi|116872641|ref|YP_849422.1| phage capsid protein [Listeria welshimeri serovar 6b str. SLCC5334]
>gi|114799242|ref|YP_759022.1| phage integrase family site specific recombinase [Hyphomonas neptunium ATCC 15444]
>gi|108807697|ref|YP_651613.1| phage shock protein operon transcriptional activator [Yersinia pestis Antiqua]
>gi|42523988|ref|NP_969368.1| phage related tail fibre protein [Bdellovibrio bacteriovorus HD100]
>gi|33866280|ref|NP_897839.1| phage integrase family protein [Synechococcus sp. WH 8102]
>gi|33865414|ref|NP_896973.1| phage integrase family protein [Synechococcus sp. WH 8102]
>gi|316934951|ref|YP_004109933.1| phage portal protein, HK97 family [Rhodopseudomonas palustris DX-1]
>gi|161511373|ref|NP_993472.2| phage shock protein operon transcriptional activator [Yersinia pestis biovar Microtus str. 91001]
>gi|78358438|ref|YP_389887.1| phage integrase family site specific recombinase [Desulfovibrio desulfuricans subsp. desulfuricans str. G20]
>gi|78355981|ref|YP_387430.1| Phage tail tape measure protein TP901, core region [Desulfovibrio desulfuricans subsp. desulfuricans str. G20]
>gi|186686716|ref|YP_001869910.1| phage integrase family protein [Nostoc punctiforme PCC 73102]
>gi|186683356|ref|YP_001866552.1| phage integrase family protein [Nostoc punctiforme PCC 73102]
>gi|186682888|ref|YP_001866084.1| TP901 family phage tail tape measure protein [Nostoc punctiforme PCC 73102]
>gi|186682074|ref|YP_001865270.1| phage integrase family protein [Nostoc punctiforme PCC 73102]
>gi|186681868|ref|YP_001865064.1| phage tail protein [Nostoc punctiforme PCC 73102]
>gi|186681293|ref|YP_001864489.1| phage integrase family protein [Nostoc punctiforme PCC 73102]
>gi|158339285|ref|YP_001520462.1| phage integrase [Acaryochloris marina MBIC11017]
>gi|158337371|ref|YP_001518546.1| phage integrase family protein [Acaryochloris marina MBIC11017]
>gi|156937341|ref|YP_001435137.1| phage integrase family protein [Ignicoccus hospitalis KIN4/I]
>gi|154248407|ref|YP_001419365.1| TP901 family phage tail tape measure protein [Xanthobacter autotrophicus Py2]
>gi|154246315|ref|YP_001417273.1| phage SPO1 DNA polymerase-related protein [Xanthobacter autotrophicus Py2]
>gi|152981081|ref|YP_001354399.1| phage portal protein [Janthinobacterium sp. Marseille]
>gi|150396865|ref|YP_001327332.1| phage terminase GpA [Sinorhizobium medicae WSM419]
>gi|150396539|ref|YP_001327006.1| phage tape measure protein [Sinorhizobium medicae WSM419]
>gi|150377510|ref|YP_001314105.1| phage integrase family protein [Sinorhizobium medicae WSM419]
>gi|150019799|ref|YP_001312053.1| phage minor structural protein [Clostridium beijerinckii NCIMB 8052]
>gi|148652162|ref|YP_001279255.1| phage integrase family protein [Psychrobacter sp. PRwf-1]
>gi|148261334|ref|YP_001235461.1| phage integrase family protein [Acidiphilium cryptum JF-5]
>gi|148260468|ref|YP_001234595.1| phage integrase family protein [Acidiphilium cryptum JF-5]
>gi|147668730|ref|YP_001213548.1| phage integrase family protein [Dehalococcoides sp. BAV1]
>gi|146299694|ref|YP_001194285.1| phage integrase family protein [Flavobacterium johnsoniae UW101]
>gi|134297331|ref|YP_001121066.1| phage terminase GpA [Burkholderia vietnamiensis G4]
>gi|134296775|ref|YP_001120510.1| phage integrase family protein [Burkholderia vietnamiensis G4]
>gi|134296052|ref|YP_001119787.1| phage SPO1 DNA polymerase-related protein [Burkholderia vietnamiensis G4]
>gi|134292503|ref|YP_001116239.1| phage integrase family protein [Burkholderia vietnamiensis G4]
>gi|134290924|ref|YP_001114693.1| phage integrase family protein [Burkholderia vietnamiensis G4]
>gi|124025292|ref|YP_001014408.1| phage integrase family protein [Prochlorococcus marinus str. NATL1A]
>gi|121997486|ref|YP_001002273.1| phage SPO1 DNA polymerase-related protein [Halorhodospira halophila SL1]
>gi|119945594|ref|YP_943274.1| phage integrase family protein [Psychromonas ingrahamii 37]
>gi|119944185|ref|YP_941865.1| phage integrase family protein [Psychromonas ingrahamii 37]
>gi|119719024|ref|YP_919519.1| phage integrase family protein [Thermofilum pendens Hrk 5]
>gi|119386436|ref|YP_917491.1| phage integrase family protein [Paracoccus denitrificans PD1222]
>gi|118474711|ref|YP_891825.1| phage portal protein [Campylobacter fetus subsp. fetus 82-40]
>gi|116693791|ref|YP_839324.1| phage integrase family protein [Burkholderia cenocepacia HI2424]
>gi|116690064|ref|YP_835687.1| phage SPO1 DNA polymerase-related protein [Burkholderia cenocepacia HI2424]
>gi|116686592|ref|YP_839839.1| phage integrase family protein [Burkholderia cenocepacia HI2424]
>gi|116495398|ref|YP_807132.1| Phage Mu protein F like protein [Lactobacillus casei ATCC 334]
>gi|115523840|ref|YP_780751.1| phage SPO1 DNA polymerase-related protein [Rhodopseudomonas palustris BisA53]
>gi|113953702|ref|YP_731204.1| phage integrase family protein [Synechococcus sp. CC9311]
>gi|110634843|ref|YP_675051.1| phage SPO1 DNA polymerase-related protein [Mesorhizobium sp. BNC1]
>gi|110634252|ref|YP_674460.1| phage integrase [Mesorhizobium sp. BNC1]
>gi|107027497|ref|YP_625008.1| phage integrase [Burkholderia cenocepacia AU 1054]
>gi|92115952|ref|YP_575681.1| phage integrase [Nitrobacter hamburgensis X14]
>gi|91788824|ref|YP_549776.1| phage integrase [Polaromonas sp. JS666]
>gi|91787418|ref|YP_548370.1| phage integrase [Polaromonas sp. JS666]
>gi|91787214|ref|YP_548166.1| phage integrase [Polaromonas sp. JS666]
>gi|91786615|ref|YP_547567.1| phage integrase [Polaromonas sp. JS666]
>gi|91786281|ref|YP_547233.1| phage integrase [Polaromonas sp. JS666]
>gi|91774232|ref|YP_566924.1| phage integrase [Methanococcoides burtonii DSM 6242]
>gi|91774214|ref|YP_566906.1| phage integrase [Methanococcoides burtonii DSM 6242]
>gi|90425142|ref|YP_533512.1| phage integrase [Rhodopseudomonas palustris BisB18]
>gi|88608802|ref|YP_505910.1| HK97 family phage portal protein [Neorickettsia sennetsu str. Miyayama]
>gi|88602293|ref|YP_502471.1| phage integrase [Methanospirillum hungatei JF-1]
>gi|87201131|ref|YP_498388.1| Phage portal protein, HK97 [Novosphingobium aromaticivorans DSM 12444]
>gi|87198280|ref|YP_495537.1| phage integrase [Novosphingobium aromaticivorans DSM 12444]
>gi|86750417|ref|YP_486913.1| Phage integrase [Rhodopseudomonas palustris HaA2]
>gi|86157887|ref|YP_464672.1| Phage integrase [Anaeromyxobacter dehalogenans 2CP-C]
>gi|85059151|ref|YP_454853.1| phage integrase [Sodalis glossinidius str. 'morsitans']
>gi|85058907|ref|YP_454609.1| phage integrase [Sodalis glossinidius str. 'morsitans']
>gi|85058823|ref|YP_454525.1| phage tail sheath protein [Sodalis glossinidius str. 'morsitans']
>gi|78777830|ref|YP_394145.1| Phage integrase [Sulfurimonas denitrificans DSM 1251]
>gi|78777136|ref|YP_393451.1| Phage integrase [Sulfurimonas denitrificans DSM 1251]
>gi|78776999|ref|YP_393314.1| Phage integrase [Sulfurimonas denitrificans DSM 1251]
>gi|78776442|ref|YP_392757.1| Phage integrase [Sulfurimonas denitrificans DSM 1251]
>gi|78067111|ref|YP_369880.1| Phage integrase [Burkholderia sp. 383]
>gi|78066456|ref|YP_369225.1| Phage integrase [Burkholderia sp. 383]
>gi|78061878|ref|YP_371786.1| Phage integrase [Burkholderia sp. 383]
>gi|77465784|ref|YP_355287.1| bacteriophage-related protein lambda family phage portal protein [Rhodobacter sphaeroides 2.4.1]
>gi|75812296|ref|YP_319915.1| Phage integrase [Anabaena variabilis ATCC 29413]
>gi|74317826|ref|YP_315566.1| phage integrase family site specific recombinase [Thiobacillus denitrificans ATCC 25259]
>gi|74317697|ref|YP_315437.1| phage integrase family site specific recombinase [Thiobacillus denitrificans ATCC 25259]
>gi|71909266|ref|YP_286853.1| Phage integrase [Dechloromonas aromatica RCB]
>gi|71906957|ref|YP_284544.1| Phage integrase [Dechloromonas aromatica RCB]
>gi|71906676|ref|YP_284263.1| Phage integrase [Dechloromonas aromatica RCB]
>gi|71280796|ref|YP_269073.1| phage integrase family site specific recombinase [Colwellia psychrerythraea 34H]
>gi|71279642|ref|YP_267112.1| phage integrase family site specific recombinase [Colwellia psychrerythraea 34H]
>gi|58580222|ref|YP_199238.1| phage integrase family site specific recombinase [Xanthomonas oryzae pv. oryzae KACC10331]
>gi|56698711|ref|YP_166466.1| phage integrase family site specific recombinase [Ruegeria pomeroyi DSS-3]
>gi|56696586|ref|YP_166944.1| phage head morphogenesis domain-containing protein [Ruegeria pomeroyi DSS-3]
>gi|56695936|ref|YP_166287.1| phage integrase family site specific recombinase [Ruegeria pomeroyi DSS-3]
>gi|55379009|ref|YP_136859.1| phage integrase [Haloarcula marismortui ATCC 43049]
>gi|55378965|ref|YP_136815.1| phage integrase/site-specific recombinase [Haloarcula marismortui ATCC 43049]
>gi|55378579|ref|YP_136429.1| phage integrase/site-specific recombinase [Haloarcula marismortui ATCC 43049]
>gi|51245434|ref|YP_065318.1| portal protein GPB of phage lambda [Desulfotalea psychrophila LSv54]
>gi|50120909|ref|YP_050076.1| phage shock protein operon transcriptional activator [Pectobacterium atrosepticum SCRI1043]
>gi|30248259|ref|NP_840329.1| Phage integrase [Nitrosomonas europaea ATCC 19718]
>gi|28210786|ref|NP_781730.1| phage terminase small subunit [Clostridium tetani E88]
>gi|226355555|ref|YP_002785295.1| phage tail sheath protein [Deinococcus deserti VCD115]
>gi|157737890|ref|YP_001490574.1| phage tail sheath protein [Arcobacter butzleri RM4018]
>gi|56709086|ref|YP_165131.1| phage integrase family site specific recombinase [Ruegeria pomeroyi DSS-3]
>gi|16767461|ref|NP_463076.1| phage tail protein [Salmonella enterica subsp. enterica serovar Typhimurium str. LT2]
>gi|16765034|ref|NP_460649.1| phage shock protein operon transcriptional activator [Salmonella enterica subsp. enterica serovar Typhimurium str. LT2]
>gi|313667630|ref|YP_004047914.1| phage related protein [Neisseria lactamica ST-640]
>gi|312794935|ref|YP_004027857.1| phage TAIL SHEATH PROTEIN [Burkholderia rhizoxinica HKI 454]
>gi|307546778|ref|YP_003899257.1| phage terminase GpA [Halomonas elongata DSM 2581]
>gi|302035678|ref|YP_003796000.1| phage integrase [Candidatus Nitrospira defluvii]
>gi|302035494|ref|YP_003795816.1| phage portal protein, lambda family [Candidatus Nitrospira defluvii]
>gi|300704537|ref|YP_003746140.1| phage hk97 tail length tape measure-related protein [Ralstonia solanacearum CFBP2957]
>gi|300704027|ref|YP_003745629.1| phage tail sheath protein [Ralstonia solanacearum CFBP2957]
>gi|300173890|ref|YP_003773056.1| phage protein [Leuconostoc gasicomitatum LMG 18811]
>gi|281491949|ref|YP_003353929.1| phage portal protein [Lactococcus lactis subsp. lactis KF147]
>gi|281491939|ref|YP_003353919.1| phage tail tape measure protein [Lactococcus lactis subsp. lactis KF147]
>gi|281491938|ref|YP_003353918.1| phage tail component [Lactococcus lactis subsp. lactis KF147]
>gi|281491554|ref|YP_003353534.1| phage tail component [Lactococcus lactis subsp. lactis KF147]
>gi|225852580|ref|YP_002732813.1| site-specific recombinase, phage integrase family protein [Brucella melitensis ATCC 23457]
>gi|148826888|ref|YP_001291641.1| phage terminase large subunit [Haemophilus influenzae PittGG]
>gi|117920799|ref|YP_869991.1| phage integrase family protein [Shewanella sp. ANA-3]
>gi|117920619|ref|YP_869811.1| phage integrase family protein [Shewanella sp. ANA-3]
>gi|117920467|ref|YP_869659.1| phage integrase family protein [Shewanella sp. ANA-3]
>gi|113971550|ref|YP_735343.1| phage integrase family protein [Shewanella sp. MR-4]
>gi|16126915|ref|NP_421479.1| phage integrase family integrase/recombinase [Caulobacter crescentus CB15]
>gi|307225947|ref|ZP_07512358.1| Packaged DNA stabilization protein from phage [Escherichia coli TA206]
>gi|198242603|ref|YP_002215453.1| phage shock protein operon transcriptional activator [Salmonella enterica subsp. enterica serovar Dublin str. CT_02021853]
>gi|194734642|ref|YP_002114720.1| phage shock protein operon transcriptional activator [Salmonella enterica subsp. enterica serovar Schwarzengrund str. CVM19633]
>gi|120599740|ref|YP_964314.1| phage tape measure protein [Shewanella sp. W3-18-1]
>gi|114049371|ref|YP_739921.1| phage integrase family protein [Shewanella sp. MR-7]
>gi|116625838|ref|YP_827994.1| phage integrase family protein [Candidatus Solibacter usitatus Ellin6076]
>gi|290959236|ref|YP_003490418.1| phage capsid protein [Streptomyces scabiei 87.22]
>gi|290958551|ref|YP_003489733.1| phage integrase [Streptomyces scabiei 87.22]
>gi|290957239|ref|YP_003488421.1| phage tail sheath proteins [Streptomyces scabiei 87.22]
>gi|290956609|ref|YP_003487791.1| phage integrase [Streptomyces scabiei 87.22]
>gi|284024214|ref|ZP_06378612.1| phage tape measure protein [Staphylococcus aureus subsp. aureus 132]
>gi|226940680|ref|YP_002795754.1| Phage tail tape measure protein, lambda family [Laribacter hongkongensis HLHK9]
>gi|226940605|ref|YP_002795679.1| Site-specific recombinase, phage integrase family protein [Laribacter hongkongensis HLHK9]
>gi|226940579|ref|YP_002795653.1| Phage portal protein, lambda family [Laribacter hongkongensis HLHK9]
>gi|226940542|ref|YP_002795616.1| Phage integrase family protein [Laribacter hongkongensis HLHK9]
>gi|226939837|ref|YP_002794910.1| Phage integrase [Laribacter hongkongensis HLHK9]
>gi|86742949|ref|YP_483349.1| phage integrase [Frankia sp. CcI3]
>gi|86739910|ref|YP_480310.1| phage integrase [Frankia sp. CcI3]
>gi|313675440|ref|YP_004053436.1| phage shock protein c, pspc [Marivirga tractuosa DSM 4126]
>gi|310828360|ref|YP_003960717.1| phage integrase [Eubacterium limosum KIST612]
>gi|308180863|ref|YP_003924991.1| HK97 family phage portal protein [Lactobacillus plantarum subsp. plantarum ST-III]
>gi|304320755|ref|YP_003854398.1| Phage integrase [Parvularcula bermudensis HTCC2503]
>gi|304320725|ref|YP_003854368.1| Phage integrase [Parvularcula bermudensis HTCC2503]
>gi|288904635|ref|YP_003429856.1| phage integrase [Streptococcus gallolyticus UCN34]
>gi|283455889|ref|YP_003360453.1| phage integrase family protein [Bifidobacterium dentium Bd1]
>gi|283455545|ref|YP_003360109.1| phage prohead protease, HK97 family protein [Bifidobacterium dentium Bd1]
>gi|218551325|ref|YP_002385117.1| phage tail protein [Escherichia fergusonii ATCC 35469]
>gi|218549371|ref|YP_002383162.1| Packaged DNA stabilization protein from phage [Escherichia fergusonii ATCC 35469]
>gi|218549011|ref|YP_002382802.1| phage shock protein operon transcriptional activator [Escherichia fergusonii ATCC 35469]
>gi|207743964|ref|YP_002260356.1| phage tail tape measure protein tp901, core region [Ralstonia solanacearum IPO1609]
>gi|170743515|ref|YP_001772170.1| phage SPO1 DNA polymerase-related protein [Methylobacterium sp. 4-46]
>gi|85859956|ref|YP_462158.1| phage integrase family protein [Syntrophus aciditrophicus SB]
>gi|75911252|ref|YP_325548.1| phage integrase [Anabaena variabilis ATCC 29413]
>gi|75910132|ref|YP_324428.1| phage integrase [Anabaena variabilis ATCC 29413]
>gi|75909300|ref|YP_323596.1| phage integrase [Anabaena variabilis ATCC 29413]
>gi|307349640|ref|ZP_07619245.1| Site-specific recombinase, phage integrase family protein [Escherichia coli TA280]
>gi|307338110|ref|ZP_07614222.1| Packaged DNA stabilization protein from phage [Escherichia coli H591]
>gi|256019923|ref|ZP_05433788.1| Phage integrase [Shigella sp. D9]
>gi|256019922|ref|ZP_05433787.1| Phage integrase [Shigella sp. D9]
>gi|224583819|ref|YP_002637617.1| phage shock protein operon transcriptional activator [Salmonella enterica subsp. enterica serovar Paratyphi C strain RKS4594]
>gi|205352631|ref|YP_002226432.1| phage shock protein operon transcriptional activator [Salmonella enterica subsp. enterica serovar Gallinarum str. 287/91]
>gi|197362310|ref|YP_002141947.1| phage shock protein operon transcriptional activator [Salmonella enterica subsp. enterica serovar Paratyphi A str. AKU_12601]
>gi|197251531|ref|YP_002149126.1| phage tail sheath protein [Salmonella enterica subsp. enterica serovar Agona str. SL483]
>gi|197250748|ref|YP_002147592.1| phage portal protein, pbsx family [Salmonella enterica subsp. enterica serovar Agona str. SL483]
>gi|197250249|ref|YP_002146338.1| phage shock protein operon transcriptional activator [Salmonella enterica subsp. enterica serovar Agona str. SL483]
>gi|194449165|ref|YP_002045735.1| phage shock protein operon transcriptional activator [Salmonella enterica subsp. enterica serovar Heidelberg str. SL476]
>gi|194444962|ref|YP_002040289.1| site-specific recombinase, phage integrase family [Salmonella enterica subsp. enterica serovar Newport str. SL254]
>gi|194444297|ref|YP_002043319.1| phage tail sheath protein [Salmonella enterica subsp. enterica serovar Newport str. SL254]
>gi|194443707|ref|YP_002040943.1| phage shock protein operon transcriptional activator [Salmonella enterica subsp. enterica serovar Newport str. SL254]
>gi|170080982|ref|YP_001730302.1| phage shock protein operon transcriptional activator [Escherichia coli str. K-12 substr. DH10B]
>gi|170079905|ref|YP_001729225.1| CP4-6 prophage; phage integrase [Escherichia coli str. K-12 substr. DH10B]
>gi|163868275|ref|YP_001609484.1| phage related protein [Bartonella tribocorum CIP 105476]
>gi|163868274|ref|YP_001609483.1| phage related protein [Bartonella tribocorum CIP 105476]
>gi|162139581|ref|YP_216671.2| phage shock protein operon transcriptional activator [Salmonella enterica subsp. enterica serovar Choleraesuis str. SC-B67]
>gi|161367607|ref|NP_287885.2| phage shock protein operon transcriptional activator [Escherichia coli O157:H7 str. EDL933]
>gi|123442383|ref|YP_001006362.1| phage shock protein operon transcriptional activator [Yersinia enterocolitica subsp. enterocolitica 8081]
>gi|89055356|ref|YP_510807.1| phage integrase [Jannaschia sp. CCS1]
>gi|76811542|ref|YP_333058.1| phage integrase family protein [Burkholderia pseudomallei 1710b]
>gi|56413387|ref|YP_150462.1| phage shock protein operon transcriptional activator [Salmonella enterica subsp. enterica serovar Paratyphi A str. ATCC 9150]
>gi|29142036|ref|NP_805378.1| phage shock protein operon transcriptional activator [Salmonella enterica subsp. enterica serovar Typhi str. Ty2]
>gi|26988689|ref|NP_744114.1| phage integrase family site specific recombinase [Pseudomonas putida KT2440]
>gi|16760195|ref|NP_455812.1| phage shock protein operon transcriptional activator [Salmonella enterica subsp. enterica serovar Typhi str. CT18]
>gi|15895158|ref|NP_348507.1| phage related protein [Clostridium acetobutylicum ATCC 824]
>gi|221142410|ref|ZP_03566903.1| SPP1 family phage head morphogenesis protein [Staphylococcus aureus subsp. aureus str. JKD6009]
>gi|171913628|ref|ZP_02929098.1| phage integrase family protein [Verrucomicrobium spinosum DSM 4136]
>gi|167911621|ref|ZP_02498712.1| phage portal protein, lambda family [Burkholderia pseudomallei 112]
>gi|167893794|ref|ZP_02481196.1| phage integrase family protein [Burkholderia pseudomallei 7894]
>gi|167893325|ref|ZP_02480727.1| phage portal protein, lambda family [Burkholderia pseudomallei 7894]
>gi|167893304|ref|ZP_02480706.1| phage integrase [Burkholderia pseudomallei 7894]
>gi|167841450|ref|ZP_02468134.1| phage integrase family protein [Burkholderia thailandensis MSMB43]
>gi|167829962|ref|ZP_02461433.1| phage integrase family protein [Burkholderia pseudomallei 9]
>gi|167824887|ref|ZP_02456358.1| phage portal protein, lambda family [Burkholderia pseudomallei 9]
>gi|167814834|ref|ZP_02446514.1| phage portal protein, lambda family [Burkholderia pseudomallei 91]
>gi|167744551|ref|ZP_02417325.1| phage portal protein, lambda family [Burkholderia pseudomallei 14]
>gi|167739966|ref|ZP_02412740.1| Phage integrase [Burkholderia pseudomallei 14]
>gi|167725634|ref|ZP_02408870.1| phage portal protein, lambda family [Burkholderia pseudomallei DM98]
>gi|167621256|ref|ZP_02389887.1| Phage integrase family protein [Burkholderia thailandensis Bt4]
>gi|167619473|ref|ZP_02388104.1| phage portal protein, lambda family [Burkholderia thailandensis Bt4]
>gi|167618213|ref|ZP_02386844.1| phage integrase family protein [Burkholderia thailandensis Bt4]
>gi|167583001|ref|ZP_02375875.1| phage integrase family protein [Burkholderia thailandensis TXDOH]
>gi|167574310|ref|ZP_02367184.1| phage integrase family protein [Burkholderia oklahomensis C6786]
>gi|167567313|ref|ZP_02360229.1| phage integrase family protein [Burkholderia oklahomensis EO147]
>gi|167466940|ref|ZP_02331644.1| phage tail protein [Yersinia pestis FV-1]
>gi|167464690|ref|ZP_02329779.1| Phage protein [Paenibacillus larvae subsp. larvae BRL-230010]
>gi|167464679|ref|ZP_02329768.1| Phage protein [Paenibacillus larvae subsp. larvae BRL-230010]
>gi|167464216|ref|ZP_02329305.1| phage tail tape measure protein, TP901 family, core region domain protein [Paenibacillus larvae subsp. larvae BRL-230010]
>gi|167464043|ref|ZP_02329132.1| phage tail tape measure protein, TP901 family [Paenibacillus larvae subsp. larvae BRL-230010]
>gi|167462182|ref|ZP_02327271.1| phage NTP-binding protein [Paenibacillus larvae subsp. larvae BRL-230010]
>gi|167462156|ref|ZP_02327245.1| phage protein [Paenibacillus larvae subsp. larvae BRL-230010]
>gi|260174955|ref|ZP_05761367.1| phage tail tape measure protein [Bacteroides sp. D2]
>gi|257467082|ref|ZP_05631393.1| phage portal protein, lambda family [Fusobacterium gonidiaformans ATCC 25563]
>gi|213021636|ref|ZP_03336083.1| phage tail tape measure protein, TP901 family [Salmonella enterica subsp. enterica serovar Typhi str. 404ty]
>gi|160900115|ref|YP_001565697.1| peptidase U35 phage prohead HK97 [Delftia acidovorans SPH-1]
>gi|255010478|ref|ZP_05282604.1| site-specific recombinase, phage integrase family protein [Bacteroides fragilis 3_1_12]
>gi|224283029|ref|ZP_03646351.1| phage tail tape measure protein, TP901 family [Bifidobacterium bifidum NCIMB 41171]
>gi|224282772|ref|ZP_03646094.1| phage integrase [Bifidobacterium bifidum NCIMB 41171]
>gi|126461390|ref|YP_001042504.1| phage integrase family protein [Rhodobacter sphaeroides ATCC 17029]
>gi|20090544|ref|NP_616619.1| phage integrase [Methanosarcina acetivorans C2A]
>gi|308186480|ref|YP_003930611.1| site-specific recombinase, phage integrase family [Pantoea vagans C9-1]
>gi|294140905|ref|YP_003556883.1| site-specific recombinase, phage integrase family [Shewanella violacea DSS12]
>gi|284159933|ref|YP_001058564.2| phage integrase family site specific recombinase [Burkholderia pseudomallei 668]
>gi|237812957|ref|YP_002897408.1| phage portal protein, lambda family [Burkholderia pseudomallei MSHR346]
>gi|237812943|ref|YP_002897394.1| phage tail sheath protein [Burkholderia pseudomallei MSHR346]
>gi|237812938|ref|YP_002897389.1| phage P2 GpU family protein [Burkholderia pseudomallei MSHR346]
>gi|237811823|ref|YP_002896274.1| site-specific recombinase, phage integrase family [Burkholderia pseudomallei MSHR346]
>gi|237811210|ref|YP_002895661.1| phage integrase family protein [Burkholderia pseudomallei MSHR346]
>gi|237811004|ref|YP_002895455.1| phage integrase family protein [Burkholderia pseudomallei MSHR346]
>gi|126441280|ref|YP_001060060.1| phage integrase [Burkholderia pseudomallei 668]
>gi|30020721|ref|NP_832352.1| Phage protein [Bacillus cereus ATCC 14579]
>gi|30020714|ref|NP_832345.1| Phage prohead protease [Bacillus cereus ATCC 14579]
>gi|30020047|ref|NP_831678.1| Phage protein [Bacillus cereus ATCC 14579]
>gi|300781922|ref|YP_003739157.1| site-specific recombinase, phage integrase family [Erwinia billingiae Eb661]
>gi|312621007|ref|YP_003993735.1| site-specific recombinase, phage integrase family protein [Photobacterium damselae subsp. damselae]
>gi|222148715|ref|YP_002549672.1| phage tail sheath protein [Agrobacterium vitis S4]
>gi|222148000|ref|YP_002548957.1| phage portal protein HK97 family [Agrobacterium vitis S4]
>gi|116669908|ref|YP_830841.1| phage integrase family protein [Arthrobacter sp. FB24]
>gi|116669557|ref|YP_830490.1| phage integrase family protein [Arthrobacter sp. FB24]
>gi|116492552|ref|YP_804287.1| Phage Mu protein F like protein [Pediococcus pentosaceus ATCC 25745]
>gi|94971301|ref|YP_593349.1| phage integrase [Candidatus Koribacter versatilis Ellin345]
>gi|94970788|ref|YP_592836.1| phage integrase [Candidatus Koribacter versatilis Ellin345]
>gi|94970176|ref|YP_592224.1| phage integrase [Candidatus Koribacter versatilis Ellin345]
>gi|94969096|ref|YP_591144.1| phage integrase [Candidatus Koribacter versatilis Ellin345]
>gi|83589229|ref|YP_429238.1| Phage integrase [Moorella thermoacetica ATCC 39073]
>gi|116512476|ref|YP_811383.1| Phage Mu protein F like protein [Lactococcus lactis subsp. cremoris SK11]
>gi|116511875|ref|YP_809091.1| Phage Mu protein F like protein [Lactococcus lactis subsp. cremoris SK11]
>gi|312200216|ref|YP_004020277.1| phage tail tape measure protein, TP901 family [Frankia sp. EuI1c]
>gi|312195015|ref|YP_004015076.1| phage shock protein A, PspA [Frankia sp. EuI1c]
>gi|162421576|ref|YP_001606950.1| phage shock protein operon transcriptional activator [Yersinia pestis Angola]
>gi|162420464|ref|YP_001606647.1| phage tail protein [Yersinia pestis Angola]
>gi|22126075|ref|NP_669498.1| phage tail protein [Yersinia pestis KIM 10]
>gi|115359714|ref|YP_776852.1| phage integrase family protein [Burkholderia ambifaria AMMD]
>gi|148555108|ref|YP_001262690.1| phage terminase GpA [Sphingomonas wittichii RW1]
>gi|148553149|ref|YP_001260731.1| phage integrase family protein [Sphingomonas wittichii RW1]
>gi|148552940|ref|YP_001260522.1| phage integrase family protein [Sphingomonas wittichii RW1]
>gi|119025957|ref|YP_909802.1| phage integrase [Bifidobacterium adolescentis ATCC 15703]
>gi|51596595|ref|YP_070786.1| phage shock protein operon transcriptional activator [Yersinia pseudotuberculosis IP 32953]
>gi|311279175|ref|YP_003941406.1| phage portal protein, lambda family [Enterobacter cloacae SCF1]
>gi|158313062|ref|YP_001505570.1| phage shock protein A, PspA [Frankia sp. EAN1pec]
>gi|46581276|ref|YP_012084.1| lambda family phage portal protein [Desulfovibrio vulgaris str. Hildenborough]
>gi|46581232|ref|YP_012040.1| phage integrase family site specific recombinase [Desulfovibrio vulgaris str. Hildenborough]
>gi|46580602|ref|YP_011410.1| phage integrase family site specific recombinase [Desulfovibrio vulgaris str. Hildenborough]
>gi|46578614|ref|YP_009422.1| lambda family phage portal protein [Desulfovibrio vulgaris str. Hildenborough]
>gi|260686805|ref|YP_003217938.1| phage protein [Clostridium difficile R20291]
>gi|260686798|ref|YP_003217931.1| phage protein [Clostridium difficile R20291]
>gi|260683209|ref|YP_003214494.1| phage protein [Clostridium difficile CD196]
>gi|260683202|ref|YP_003214487.1| phage protein [Clostridium difficile CD196]
>gi|256371743|ref|YP_003109567.1| phage shock protein A, PspA [Acidimicrobium ferrooxidans DSM 10331]
>gi|159184656|ref|NP_354205.2| phage tail fiber protein [Agrobacterium tumefaciens str. C58]
>gi|152967083|ref|YP_001362867.1| phage integrase family protein [Kineococcus radiotolerans SRS30216]
>gi|152965874|ref|YP_001361658.1| phage integrase family protein [Kineococcus radiotolerans SRS30216]
>gi|145594876|ref|YP_001159173.1| phage integrase family protein [Salinispora tropica CNB-440]
>gi|145594863|ref|YP_001159160.1| phage integrase family protein [Salinispora tropica CNB-440]
>gi|145593868|ref|YP_001158165.1| phage integrase family protein [Salinispora tropica CNB-440]
>gi|126436225|ref|YP_001071916.1| phage integrase family protein [Mycobacterium sp. JLS]
>gi|120404244|ref|YP_954073.1| phage integrase family protein [Mycobacterium vanbaalenii PYR-1]
>gi|120402127|ref|YP_951956.1| phage integrase family protein [Mycobacterium vanbaalenii PYR-1]
>gi|119868677|ref|YP_938629.1| phage integrase family protein [Mycobacterium sp. KMS]
>gi|119714858|ref|YP_921823.1| phage integrase family protein [Nocardioides sp. JS614]
>gi|116751213|ref|YP_847900.1| phage integrase family protein [Syntrophobacter fumaroxidans MPOB]
>gi|116629342|ref|YP_814514.1| Phage late control gene D protein GPD [Lactobacillus gasseri ATCC 33323]
>gi|116629327|ref|YP_814499.1| Phage Mu protein F like protein [Lactobacillus gasseri ATCC 33323]
>gi|116629281|ref|YP_814453.1| Phage late control gene D protein GPD [Lactobacillus gasseri ATCC 33323]
>gi|116629276|ref|YP_814448.1| Phage related protein [Lactobacillus gasseri ATCC 33323]
>gi|116629267|ref|YP_814439.1| Phage Mu protein F like protein [Lactobacillus gasseri ATCC 33323]
>gi|113474869|ref|YP_720930.1| phage tail Collar [Trichodesmium erythraeum IMS101]
>gi|108762439|ref|YP_629459.1| phage integrase family site specific recombinase [Myxococcus xanthus DK 1622]
>gi|108761635|ref|YP_633012.1| phage integrase family site specific recombinase [Myxococcus xanthus DK 1622]
>gi|108760776|ref|YP_630114.1| PBSX family phage portal protein [Myxococcus xanthus DK 1622]
>gi|94994693|ref|YP_602791.1| phage structural protein [Streptococcus pyogenes MGAS10750]
>gi|94992961|ref|YP_601060.1| phage protein [Streptococcus pyogenes MGAS2096]
>gi|94989070|ref|YP_597171.1| phage protein [Streptococcus pyogenes MGAS9429]
>gi|94311110|ref|YP_584320.1| phage integrase [Cupriavidus metallidurans CH34]
>gi|94310181|ref|YP_583391.1| phage integrase [Cupriavidus metallidurans CH34]
>gi|77165703|ref|YP_344228.1| Phage integrase [Nitrosococcus oceani ATCC 19707]
>gi|71911251|ref|YP_282801.1| phage protein [Streptococcus pyogenes MGAS5005]
>gi|71911000|ref|YP_282550.1| phage structural protein [Streptococcus pyogenes MGAS5005]
>gi|71910834|ref|YP_282384.1| phage protein [Streptococcus pyogenes MGAS5005]
>gi|71910822|ref|YP_282372.1| phage protein [Streptococcus pyogenes MGAS5005]
>gi|71903660|ref|YP_280463.1| phage protein [Streptococcus pyogenes MGAS6180]
>gi|70730377|ref|YP_260116.1| phage integrase family site specific recombinase [Pseudomonas fluorescens Pf-5]
>gi|70729390|ref|YP_259128.1| Phage tail sheath protein [Pseudomonas fluorescens Pf-5]
>gi|70729358|ref|YP_259095.1| phage integrase family site specific recombinase [Pseudomonas fluorescens Pf-5]
>gi|50914905|ref|YP_060877.1| unknown phage protein [Streptococcus pyogenes MGAS10394]
>gi|50914561|ref|YP_060533.1| Phage structural protein [Streptococcus pyogenes MGAS10394]
>gi|50914484|ref|YP_060456.1| Phage prohead protease [Streptococcus pyogenes MGAS10394]
>gi|50914476|ref|YP_060448.1| unknown phage protein [Streptococcus pyogenes MGAS10394]
>gi|50913390|ref|YP_059362.1| unknown phage protein [Streptococcus pyogenes MGAS10394]
>gi|19745803|ref|NP_606939.1| hyaluronidase - phage associated [Streptococcus pyogenes MGAS8232]
>gi|294506550|ref|YP_003570608.1| Phage integrase family protein [Salinibacter ruber M8]
>gi|294506505|ref|YP_003570563.1| Phage integrase family protein [Salinibacter ruber M8]
>gi|226945661|ref|YP_002800734.1| Phage integrase [Azotobacter vinelandii DJ]
>gi|218695962|ref|YP_002403629.1| Packaged DNA stabilization protein from phage [Escherichia coli 55989]
>gi|218694879|ref|YP_002402546.1| phage shock protein operon transcriptional activator [Escherichia coli 55989]
>gi|218553861|ref|YP_002386774.1| phage shock protein operon transcriptional activator [Escherichia coli IAI1]
>gi|161984928|ref|YP_408188.2| phage shock protein operon transcriptional activator [Shigella boydii Sb227]
>gi|157161459|ref|YP_001458777.1| lambda family phage portal protein [Escherichia coli HS]
>gi|157160814|ref|YP_001458132.1| phage shock protein operon transcriptional activator [Escherichia coli HS]
>gi|157160365|ref|YP_001457683.1| phage tail tape measure protein [Escherichia coli HS]
>gi|150390005|ref|YP_001320054.1| phage integrase family protein [Alkaliphilus metalliredigens QYMF]
>gi|150389215|ref|YP_001319264.1| phage integrase family protein [Alkaliphilus metalliredigens QYMF]
>gi|134046513|ref|YP_001097998.1| phage integrase family protein [Methanococcus maripaludis C5]
>gi|117926680|ref|YP_867297.1| phage SPO1 DNA polymerase-related protein [Magnetococcus sp. MC-1]
>gi|117926087|ref|YP_866704.1| TP901 family phage tail tape measure protein [Magnetococcus sp. MC-1]
>gi|117926015|ref|YP_866632.1| TP901 family phage tail tape measure protein [Magnetococcus sp. MC-1]
>gi|117925850|ref|YP_866467.1| TP901 family phage tail tape measure protein [Magnetococcus sp. MC-1]
>gi|117925324|ref|YP_865941.1| TP901 family phage tail tape measure protein [Magnetococcus sp. MC-1]
>gi|117924638|ref|YP_865255.1| TP901 family phage tail tape measure protein [Magnetococcus sp. MC-1]
>gi|117924572|ref|YP_865189.1| TP901 family phage tail tape measure protein [Magnetococcus sp. MC-1]
>gi|110800747|ref|YP_696019.1| TP901 family phage tail tape measure protein [Clostridium perfringens ATCC 13124]
>gi|104783117|ref|YP_609615.1| phage tail protein [Pseudomonas entomophila L48]
>gi|88195733|ref|YP_500542.1| PBSX family phage terminase large subunit [Staphylococcus aureus subsp. aureus NCTC 8325]
>gi|83716089|ref|YP_439527.1| Phage tail sheath protein [Burkholderia thailandensis E264]
>gi|83648315|ref|YP_436750.1| lambda family phage portal protein [Hahella chejuensis KCTC 2396]
>gi|71735945|ref|YP_274609.1| phage integrase family site specific recombinase [Pseudomonas syringae pv. phaseolicola 1448A]
>gi|66047819|ref|YP_237660.1| Phage tail tape measure protein TP901, core region [Pseudomonas syringae pv. syringae B728a]
>gi|52079943|ref|YP_078734.1| phage related protein [Bacillus licheniformis ATCC 14580]
>gi|52079874|ref|YP_078665.1| phage related protein [Bacillus licheniformis ATCC 14580]
>gi|52079858|ref|YP_078649.1| phage related minor head protein [Bacillus licheniformis ATCC 14580]
>gi|52079730|ref|YP_078521.1| phage related protein [Bacillus licheniformis ATCC 14580]
>gi|28871736|ref|NP_794355.1| site-specific recombinase, phage integrase family [Pseudomonas syringae pv. tomato str. DC3000]
>gi|28871200|ref|NP_793819.1| site-specific recombinase, phage integrase family [Pseudomonas syringae pv. tomato str. DC3000]
>gi|28870769|ref|NP_793388.1| site-specific recombinase, phage integrase family [Pseudomonas syringae pv. tomato str. DC3000]
>gi|23501956|ref|NP_698083.1| phage integrase family site specific recombinase [Brucella suis 1330]
>gi|23501523|ref|NP_697650.1| phage integrase family site specific recombinase [Brucella suis 1330]
>gi|254793873|ref|YP_003078710.1| phage tail sheath protein FI [Escherichia coli O157:H7 str. TW14359]
>gi|254793870|ref|YP_003078707.1| phage related tail protein [Escherichia coli O157:H7 str. TW14359]
>gi|222530375|ref|YP_002574257.1| phage recombination protein Bet [Caldicellulosiruptor bescii DSM 6725]
>gi|218700025|ref|YP_002407654.1| phage shock protein operon transcriptional activator [Escherichia coli IAI39]
>gi|218689293|ref|YP_002397505.1| phage shock protein operon transcriptional activator [Escherichia coli ED1a]
>gi|218689203|ref|YP_002397415.1| phage integrase [Escherichia coli ED1a]
>gi|170717950|ref|YP_001784999.1| phage integrase family protein [Haemophilus somnus 2336]
>gi|161950105|ref|YP_403537.2| phage shock protein operon transcriptional activator [Shigella dysenteriae Sd197]
>gi|157159232|ref|YP_001462543.1| lambda family phage portal protein [Escherichia coli E24377A]
>gi|157158542|ref|YP_001463323.1| phage integrase family site specific recombinase [Escherichia coli E24377A]
>gi|157157570|ref|YP_001463286.1| phage baseplate assembly protein V [Escherichia coli E24377A]
>gi|157154719|ref|YP_001462610.1| phage shock protein operon transcriptional activator [Escherichia coli E24377A]
>gi|110805306|ref|YP_688826.1| phage shock protein operon transcriptional activator [Shigella flexneri 5 str. 8401]
>gi|110641537|ref|YP_669267.1| phage shock protein operon transcriptional activator [Escherichia coli 536]
>gi|57867512|ref|YP_189166.1| phage integrase family site specific recombinase [Staphylococcus epidermidis RP62A]
>gi|38703961|ref|NP_309907.2| phage shock protein operon transcriptional activator [Escherichia coli O157:H7 str. Sakai]
>gi|302132894|ref|ZP_07258884.1| SPP1 family phage head morphogenesis protein [Pseudomonas syringae pv. tomato NCPPB 1108]
>gi|258543107|ref|YP_003188540.1| phage DNA recombinase [Acetobacter pasteurianus IFO 3283-01]
>gi|258513233|ref|YP_003189489.1| phage DNA recombinase [Acetobacter pasteurianus IFO 3283-01]
>gi|256369505|ref|YP_003107013.1| site-specific recombinase, phage integrase family [Brucella microti CCM 4915]
>gi|256369075|ref|YP_003106583.1| site-specific recombinase, phage integrase family [Brucella microti CCM 4915]
>gi|254796407|ref|YP_003081243.1| phage portal protein, HK97 family [Neorickettsia risticii str. Illinois]
>gi|254161383|ref|YP_003044491.1| phage shock protein operon transcriptional activator [Escherichia coli B str. REL606]
>gi|253999990|ref|YP_003052053.1| phage SPO1 DNA polymerase-related protein [Methylovorus sp. SIP3-4]
>gi|253798259|ref|YP_003031260.1| phiRv2 phage integrase [Mycobacterium tuberculosis KZN 1435]
>gi|253774258|ref|YP_003037089.1| phage replication protein O [Escherichia coli BL21-Gold(DE3)pLysS AG]
>gi|253773695|ref|YP_003036526.1| phage shock protein operon transcriptional activator [Escherichia coli BL21-Gold(DE3)pLysS AG]
>gi|239908837|ref|YP_002955579.1| phage integrase family protein [Desulfovibrio magneticus RS-1]
>gi|239908241|ref|YP_002954982.1| phage integrase family protein [Desulfovibrio magneticus RS-1]
>gi|237795046|ref|YP_002862598.1| phage head morphogenesis protein, SPP1 gp7 family [Clostridium botulinum Ba4 str. 657]
>gi|226227658|ref|YP_002761764.1| phage portal protein lambda family protein [Gemmatimonas aurantiaca T-27]
>gi|225874710|ref|YP_002756169.1| phage integrase family protein [Acidobacterium capsulatum ATCC 51196]
>gi|225873175|ref|YP_002754634.1| phage integrase family protein [Acidobacterium capsulatum ATCC 51196]
>gi|225872316|ref|YP_002753771.1| phage integrase family protein [Acidobacterium capsulatum ATCC 51196]
>gi|225871328|ref|YP_002747275.1| phage minor head protein [Streptococcus equi subsp. equi 4047]
>gi|225630454|ref|YP_002727245.1| phage tail sheath protein [Wolbachia sp. wRi]
>gi|224373197|ref|YP_002607569.1| phage integrase [Nautilia profundicola AmH]
>gi|224369185|ref|YP_002603349.1| phage integrase protein (DNA breaking and rejoining enzyme) [Desulfobacterium autotrophicum HRM2]
>gi|222107105|ref|YP_002547896.1| phage tail protein [Agrobacterium vitis S4]
>gi|221369889|ref|YP_002520985.1| Phage integrase [Rhodobacter sphaeroides KD131]
>gi|221369847|ref|YP_002520943.1| Phage portal protein, lambda family [Rhodobacter sphaeroides KD131]
>gi|221232281|ref|YP_002511434.1| phage tail protein [Streptococcus pneumoniae ATCC 700669]
>gi|220930188|ref|YP_002507097.1| phage minor structural protein [Clostridium cellulolyticum H10]
>gi|219871331|ref|YP_002475706.1| phage integrase [Haemophilus parasuis SH0165]
>gi|218898909|ref|YP_002447320.1| phage tail fiber protein [Bacillus cereus G9842]
>gi|218897906|ref|YP_002446317.1| phage protein [Bacillus cereus G9842]
>gi|218897620|ref|YP_002446031.1| phage tail fiber protein [Bacillus cereus G9842]
>gi|218897619|ref|YP_002446030.1| phage protein [Bacillus cereus G9842]
>gi|218891236|ref|YP_002440102.1| site-specific recombinase, phage integrase family [Pseudomonas aeruginosa LESB58]
>gi|218886394|ref|YP_002435715.1| phage tail tape measure protein, TP901 family [Desulfovibrio vulgaris str. 'Miyazaki F']
>gi|218848491|ref|YP_002455116.1| phage integrase family protein [Bacillus cereus AH820]
>gi|218532502|ref|YP_002423318.1| phage SPO1 DNA polymerase-related protein [Methylobacterium chloromethanicum CM4]
>gi|218528714|ref|YP_002419530.1| phage shock protein A, PspA [Methylobacterium chloromethanicum CM4]
>gi|218231887|ref|YP_002367342.1| phage tail fiber protein [Bacillus cereus B4264]
>gi|217971972|ref|YP_002356723.1| phage portal protein, lambda family [Shewanella baltica OS223]
>gi|217959650|ref|YP_002338202.1| phage tail fiber protein [Bacillus cereus AH187]
>gi|217958131|ref|YP_002336675.1| phage tail fiber protein [Bacillus cereus AH187]
>gi|215486600|ref|YP_002329031.1| phage shock protein operon transcriptional activator [Escherichia coli O127:H6 str. E2348/69]
>gi|215484218|ref|YP_002326445.1| phage head morphogenesis protein, SPP1 gp7 family domain protein [Acinetobacter baumannii AB307-0294]
>gi|213692363|ref|YP_002322949.1| phage integrase family protein [Bifidobacterium longum subsp. infantis ATCC 15697]
>gi|213692229|ref|YP_002322815.1| phage integrase family protein [Bifidobacterium longum subsp. infantis ATCC 15697]
>gi|209964594|ref|YP_002297509.1| phage portal protein, lambda family [Rhodospirillum centenum SW]
>gi|209964588|ref|YP_002297503.1| phage integrase [Rhodospirillum centenum SW]
>gi|209963415|ref|YP_002296330.1| phage portal protein, lambda family [Rhodospirillum centenum SW]
>gi|209919760|ref|YP_002293844.1| phage tail fiber protein [Escherichia coli SE11]
>gi|209918546|ref|YP_002292630.1| phage shock protein operon transcriptional activator [Escherichia coli SE11]
>gi|209886755|ref|YP_002290612.1| phage integrase [Oligotropha carboxidovorans OM5]
>gi|209884716|ref|YP_002288573.1| phage portal protein, lambda family [Oligotropha carboxidovorans OM5]
>gi|209883972|ref|YP_002287829.1| phage portal protein of lambda family [Oligotropha carboxidovorans OM5]
>gi|209883391|ref|YP_002287248.1| phage integrase [Oligotropha carboxidovorans OM5]
>gi|209550048|ref|YP_002281965.1| phage recombination protein Bet [Rhizobium leguminosarum bv. trifolii WSM2304]
>gi|209399988|ref|YP_002271143.1| site-specific recombinase, phage integrase family [Escherichia coli O157:H7 str. EC4115]
>gi|209399284|ref|YP_002271018.1| phage tail sheath protein [Escherichia coli O157:H7 str. EC4115]
>gi|209398276|ref|YP_002272119.1| site-specific recombinase, phage integrase family protein [Escherichia coli O157:H7 str. EC4115]
>gi|209397347|ref|YP_002271328.1| phage tail tape measure protein, TP901 family [Escherichia coli O157:H7 str. EC4115]
>gi|209397008|ref|YP_002271330.1| phage tail sheath protein [Escherichia coli O157:H7 str. EC4115]
>gi|206577296|ref|YP_002239229.1| site-specific recombinase, phage integrase family [Klebsiella pneumoniae 342]
>gi|206576308|ref|YP_002240235.1| site-specific recombinase, phage integrase family protein [Klebsiella pneumoniae 342]
>gi|197121903|ref|YP_002133854.1| phage SPO1 DNA polymerase-related protein [Anaeromyxobacter sp. K]
>gi|197105806|ref|YP_002131183.1| phage integrase [Phenylobacterium zucineum HLK1]
>gi|196158395|ref|YP_002127884.1| site-specific recombinase, phage integrase family protein [Alteromonas macleodii 'Deep ecotype']
>gi|196155133|ref|YP_002124622.1| site-specific recombinase, phage integrase family protein [Alteromonas macleodii 'Deep ecotype']
>gi|196155118|ref|YP_002124607.1| site-specific recombinase, phage integrase family protein [Alteromonas macleodii 'Deep ecotype']
>gi|192291432|ref|YP_001992037.1| phage terminase, large subunit, PBSX family [Rhodopseudomonas palustris TIE-1]
>gi|189024236|ref|YP_001935004.1| Phage integrase [Brucella abortus S19]
>gi|189023854|ref|YP_001934622.1| Phage integrase [Brucella abortus S19]
>gi|188588934|ref|YP_001921113.1| phage portal protein, lambda family [Clostridium botulinum E3 str. Alaska E43]
>gi|188583952|ref|YP_001927397.1| phage SPO1 DNA polymerase-related protein [Methylobacterium populi BJ001]
>gi|188577638|ref|YP_001914567.1| phage tail sheath protein [Xanthomonas oryzae pv. oryzae PXO99A]
>gi|188533780|ref|YP_001907577.1| phage shock protein operon transcriptional activator [Erwinia tasmaniensis Et1/99]
>gi|187934456|ref|YP_001885155.1| phage tail tape measure protein, family [Clostridium botulinum B str. Eklund 17B]
>gi|187934144|ref|YP_001884292.1| phage portal protein [Clostridium botulinum B str. Eklund 17B]
>gi|187924459|ref|YP_001896101.1| phage SPO1 DNA polymerase-related protein [Burkholderia phytofirmans PsJN]
>gi|187735611|ref|YP_001877723.1| phage SPO1 DNA polymerase-related protein [Akkermansia muciniphila ATCC BAA-835]
>gi|186895654|ref|YP_001872766.1| phage shock protein operon transcriptional activator [Yersinia pseudotuberculosis PB1/+]
>gi|186476121|ref|YP_001857591.1| phage SPO1 DNA polymerase-related protein [Burkholderia phymatum STM815]
>gi|184154949|ref|YP_001843289.1| phage capsid protein [Lactobacillus fermentum IFO 3956]
>gi|184153736|ref|YP_001842077.1| phage integrase [Lactobacillus reuteri JCM 1112]
>gi|184153301|ref|YP_001841642.1| phage capsid protein [Lactobacillus reuteri JCM 1112]
>gi|182415672|ref|YP_001820738.1| phage SPO1 DNA polymerase-related protein [Opitutus terrae PB90-1]
>gi|172060990|ref|YP_001808642.1| phage SPO1 DNA polymerase-related protein [Burkholderia ambifaria MC40-6]
>gi|170760800|ref|YP_001787260.1| phage protein [Clostridium botulinum A3 str. Loch Maree]
>gi|170755286|ref|YP_001781727.1| phage protein [Clostridium botulinum B1 str. Okra]
>gi|170754777|ref|YP_001781757.1| phage NTP-binding protein [Clostridium botulinum B1 str. Okra]
>gi|170750469|ref|YP_001756729.1| phage SPO1 DNA polymerase-related protein [Methylobacterium radiotolerans JCM 2831]
>gi|170733398|ref|YP_001765345.1| phage SPO1 DNA polymerase-related protein [Burkholderia cenocepacia MC0-3]
>gi|170683123|ref|YP_001746290.1| phage tail sheath protein [Escherichia coli SMS-3-5]
>gi|170682438|ref|YP_001743215.1| phage integrase family site specific recombinase [Escherichia coli SMS-3-5]
>gi|170024132|ref|YP_001720637.1| phage shock protein operon transcriptional activator [Yersinia pseudotuberculosis YPIII]
>gi|170020330|ref|YP_001725284.1| phage shock protein operon transcriptional activator [Escherichia coli ATCC 8739]
>gi|169833164|ref|YP_001693526.1| phage minor capsid protein 2 [Streptococcus pneumoniae Hungary19A-6]
>gi|169830712|ref|YP_001716694.1| phage integrase family protein [Candidatus Desulforudis audaxviator MP104C]
>gi|169830694|ref|YP_001716676.1| phage integrase family protein [Candidatus Desulforudis audaxviator MP104C]
>gi|163853643|ref|YP_001641686.1| phage SPO1 DNA polymerase-related protein [Methylobacterium extorquens PA1]
>gi|163843345|ref|YP_001627749.1| site-specific recombinase, phage integrase family protein [Brucella suis ATCC 23445]
>gi|161986522|ref|YP_310747.2| phage shock protein operon transcriptional activator [Shigella sonnei Ss046]
>gi|161619029|ref|YP_001592916.1| site-specific recombinase, phage integrase family protein [Brucella canis ATCC 23365]
>gi|161524407|ref|YP_001579419.1| phage SPO1 DNA polymerase-related protein [Burkholderia multivorans ATCC 17616]
>gi|160873908|ref|YP_001553224.1| lambda family phage portal protein [Shewanella baltica OS195]
>gi|160873906|ref|YP_001553222.1| phage terminase GpA [Shewanella baltica OS195]
>gi|158421527|ref|YP_001527754.1| Phage portal protein [Deinococcus geothermalis DSM 11300]
>gi|157412940|ref|YP_001483806.1| phage integrase family protein [Prochlorococcus marinus str. MIT 9215]
>gi|157370865|ref|YP_001478854.1| phage shock protein operon transcriptional activator [Serratia proteamaculans 568]
>gi|157164010|ref|YP_001467429.1| site-specific recombinase, phage integrase family protein [Campylobacter concisus 13826]
>gi|154149279|ref|YP_001407091.1| site-specific recombinase phage integrase family protein [Campylobacter hominis ATCC BAA-381]
>gi|153951461|ref|YP_001397554.1| phage integrase [Campylobacter jejuni subsp. doylei 269.97]
>gi|153940733|ref|YP_001391661.1| SPP1 family phage head morphogenesis protein [Clostridium botulinum F str. Langeland]
>gi|153009657|ref|YP_001370872.1| phage integrase family protein [Ochrobactrum anthropi ATCC 49188]
>gi|153009622|ref|YP_001370837.1| TP901 family phage tail tape measure protein [Ochrobactrum anthropi ATCC 49188]
>gi|153008037|ref|YP_001369252.1| phage integrase family protein [Ochrobactrum anthropi ATCC 49188]
>gi|153005656|ref|YP_001379981.1| phage integrase family protein [Anaeromyxobacter sp. Fw109-5]
>gi|153003947|ref|YP_001378272.1| phage integrase family protein [Anaeromyxobacter sp. Fw109-5]
>gi|153002758|ref|YP_001368439.1| phage integrase family protein [Shewanella baltica OS185]
>gi|153001872|ref|YP_001367553.1| phage integrase family protein [Shewanella baltica OS185]
>gi|153000498|ref|YP_001366179.1| phage integrase family protein [Shewanella baltica OS185]
>gi|153000476|ref|YP_001366157.1| phage integrase family protein [Shewanella baltica OS185]
>gi|153000221|ref|YP_001365902.1| phage integrase family protein [Shewanella baltica OS185]
>gi|152999284|ref|YP_001364965.1| phage integrase family protein [Shewanella baltica OS185]
>gi|152998217|ref|YP_001343052.1| phage integrase family protein [Marinomonas sp. MWYL1]
>gi|152998215|ref|YP_001343050.1| phage integrase family protein [Marinomonas sp. MWYL1]
>gi|152993870|ref|YP_001359591.1| phage integrase family site specific recombinase [Sulfurovum sp. NBC37-1]
>gi|152993025|ref|YP_001358746.1| phage integrase family site specific recombinase [Sulfurovum sp. NBC37-1]
>gi|152991432|ref|YP_001357154.1| phage integrase family site specific recombinase [Nitratiruptor sp. SB155-2]
>gi|152990189|ref|YP_001355911.1| phage integrase family site specific recombinase [Nitratiruptor sp. SB155-2]
>gi|152989057|ref|YP_001347784.1| phage tail tape measure protein lambda [Pseudomonas aeruginosa PA7]
>gi|152986278|ref|YP_001346160.1| phage tail sheath protein [Pseudomonas aeruginosa PA7]
>gi|152985084|ref|YP_001345763.1| phage integrase [Pseudomonas aeruginosa PA7]
>gi|152983696|ref|YP_001345483.1| phage integrase family site specific recombinase [Pseudomonas aeruginosa PA7]
>gi|152983624|ref|YP_001347730.1| phage integrase family site specific recombinase [Pseudomonas aeruginosa PA7]
>gi|152977717|ref|YP_001343346.1| phage integrase family protein [Actinobacillus succinogenes 130Z]
>gi|151222100|ref|YP_001332922.1| phage tail tape measure protein [Staphylococcus aureus subsp. aureus str. Newman]
>gi|151222099|ref|YP_001332921.1| phage tail fiber protein [Staphylococcus aureus subsp. aureus str. Newman]
>gi|151222003|ref|YP_001332825.1| phage head morphogenesis protein [Staphylococcus aureus subsp. aureus str. Newman]
>gi|151222001|ref|YP_001332823.1| phage head protein [Staphylococcus aureus subsp. aureus str. Newman]
>gi|151221992|ref|YP_001332814.1| phage tape measure protein [Staphylococcus aureus subsp. aureus str. Newman]
>gi|151221240|ref|YP_001332062.1| phage tape measure protein [Staphylococcus aureus subsp. aureus str. Newman]
>gi|151221231|ref|YP_001332053.1| phage head protein [Staphylococcus aureus subsp. aureus str. Newman]
>gi|151221229|ref|YP_001332051.1| phage head morphogenesis protein [Staphylococcus aureus subsp. aureus str. Newman]
>gi|148245165|ref|YP_001219858.1| phage related protein [Clostridium kluyveri DSM 555]
>gi|146311822|ref|YP_001176896.1| phage shock protein operon transcriptional activator [Enterobacter sp. 638]
>gi|146310674|ref|YP_001175748.1| phage replication protein O domain-containing protein [Enterobacter sp. 638]
>gi|146294888|ref|YP_001185312.1| phage integrase family protein [Shewanella putrefaciens CN-32]
>gi|146293986|ref|YP_001184410.1| phage integrase family protein [Shewanella putrefaciens CN-32]
>gi|146283669|ref|YP_001173822.1| phage integrase family site specific recombinase [Pseudomonas stutzeri A1501]
>gi|145598308|ref|YP_001162384.1| phage tail protein [Yersinia pestis Pestoides F]
>gi|145598093|ref|YP_001162169.1| phage shock protein operon transcriptional activator [Yersinia pestis Pestoides F]
>gi|145590025|ref|YP_001156622.1| phage integrase family protein [Polynucleobacter necessarius subsp. asymbioticus QLW-P1DMWA-1]
>gi|145589874|ref|YP_001156471.1| phage integrase family protein [Polynucleobacter necessarius subsp. asymbioticus QLW-P1DMWA-1]
>gi|145300333|ref|YP_001143174.1| phage integrase [Aeromonas salmonicida subsp. salmonicida A449]
>gi|145298999|ref|YP_001141840.1| phage protein [Aeromonas salmonicida subsp. salmonicida A449]
>gi|145298986|ref|YP_001141827.1| phage protein [Aeromonas salmonicida subsp. salmonicida A449]
>gi|145297530|ref|YP_001140371.1| phage integrase family protein [Aeromonas salmonicida subsp. salmonicida A449]
>gi|145225994|ref|YP_001136648.1| phage integrase family protein [Mycobacterium gilvum PYR-GCK]
>gi|145225223|ref|YP_001135901.1| phage integrase family protein [Mycobacterium gilvum PYR-GCK]
>gi|145223514|ref|YP_001134192.1| phage integrase family protein [Mycobacterium gilvum PYR-GCK]
>gi|145221183|ref|YP_001131861.1| phage integrase family protein [Mycobacterium gilvum PYR-GCK]
>gi|145221181|ref|YP_001131859.1| phage integrase family protein [Mycobacterium gilvum PYR-GCK]
>gi|134298789|ref|YP_001112285.1| phage integrase family protein [Desulfotomaculum reducens MI-1]
>gi|126175805|ref|YP_001051954.1| phage integrase family protein [Shewanella baltica OS155]
>gi|126175738|ref|YP_001051887.1| phage integrase family protein [Shewanella baltica OS155]
>gi|126174528|ref|YP_001050677.1| phage integrase family protein [Shewanella baltica OS155]
>gi|126174526|ref|YP_001050675.1| phage integrase family protein [Shewanella baltica OS155]
>gi|121605157|ref|YP_982486.1| phage terminase GpA [Polaromonas naphthalenivorans CJ2]
>gi|120554136|ref|YP_958487.1| phage integrase family protein [Marinobacter aquaeolei VT8]
>gi|120553152|ref|YP_957503.1| phage integrase family protein [Marinobacter aquaeolei VT8]
>gi|120553134|ref|YP_957485.1| phage integrase family protein [Marinobacter aquaeolei VT8]
>gi|120553133|ref|YP_957484.1| phage integrase family protein [Marinobacter aquaeolei VT8]
>gi|120537161|ref|YP_957218.1| phage integrase family protein [Marinobacter aquaeolei VT8]
>gi|120537100|ref|YP_957157.1| phage integrase family protein [Marinobacter aquaeolei VT8]
>gi|120436834|ref|YP_862520.1| phage integrase family protein [Gramella forsetii KT0803]
>gi|120434631|ref|YP_860321.1| phage integrase family protein [Gramella forsetii KT0803]
>gi|118580791|ref|YP_902041.1| phage integrase family protein [Pelobacter propionicus DSM 2379]
>gi|118580552|ref|YP_901802.1| phage integrase family protein [Pelobacter propionicus DSM 2379]
>gi|118445180|ref|YP_891149.1| phage terminase small subunit [Bacillus thuringiensis str. Al Hakam]
>gi|117623558|ref|YP_852471.1| phage shock protein operon transcriptional activator [Escherichia coli APEC O1]
>gi|114571348|ref|YP_758028.1| phage integrase family protein [Maricaulis maris MCS10]
>gi|114564648|ref|YP_752162.1| phage integrase family protein [Shewanella frigidimarina NCIMB 400]
>gi|114564638|ref|YP_752152.1| phage integrase family protein [Shewanella frigidimarina NCIMB 400]
>gi|114564636|ref|YP_752150.1| phage integrase family protein [Shewanella frigidimarina NCIMB 400]
>gi|114564601|ref|YP_752115.1| phage integrase family protein [Shewanella frigidimarina NCIMB 400]
>gi|114564599|ref|YP_752113.1| phage integrase family protein [Shewanella frigidimarina NCIMB 400]
>gi|114562851|ref|YP_750364.1| phage terminase GpA [Shewanella frigidimarina NCIMB 400]
>gi|114562831|ref|YP_750344.1| phage integrase family protein [Shewanella frigidimarina NCIMB 400]
>gi|110669152|ref|YP_658963.1| phage integrase [Haloquadratum walsbyi DSM 16790]
>gi|109898339|ref|YP_661594.1| phage integrase [Pseudoalteromonas atlantica T6c]
>gi|109897057|ref|YP_660312.1| phage integrase [Pseudoalteromonas atlantica T6c]
>gi|108811975|ref|YP_647742.1| phage shock protein operon transcriptional activator [Yersinia pestis Nepal516]
>gi|108811753|ref|YP_647520.1| phage tail protein [Yersinia pestis Nepal516]
>gi|92117913|ref|YP_577642.1| phage portal protein, lambda [Nitrobacter hamburgensis X14]
>gi|92117683|ref|YP_577412.1| phage integrase [Nitrobacter hamburgensis X14]
>gi|92117406|ref|YP_577135.1| phage integrase [Nitrobacter hamburgensis X14]
>gi|91794609|ref|YP_564260.1| phage integrase [Shewanella denitrificans OS217]
>gi|90961761|ref|YP_535677.1| portal protein [Lactobacillus phage Sal1]
>gi|90961264|ref|YP_535180.1| portal protein [Lactobacillus phage Sal2]
>gi|77920486|ref|YP_358301.1| phage tail sheath protein FI [Pelobacter carbinolicus DSM 2380]
>gi|58039671|ref|YP_191635.1| Phage tail sheath protein [Gluconobacter oxydans 621H]
>gi|56479555|ref|YP_161144.1| lambda family phage portal protein [Aromatoleum aromaticum EbN1]
>gi|56475446|ref|YP_157035.1| phage integrase [Aromatoleum aromaticum EbN1]
>gi|307126231|ref|YP_003878262.1| phage structural protein [Streptococcus pneumoniae 670-6B]
>gi|294085315|ref|YP_003552075.1| phage integrase family protein [Candidatus Puniceispirillum marinum IMCC1322]
>gi|294085314|ref|YP_003552074.1| site-specific recombinase, phage integrase family [Candidatus Puniceispirillum marinum IMCC1322]
>gi|294084861|ref|YP_003551621.1| phage integrase [Candidatus Puniceispirillum marinum IMCC1322]
>gi|294083745|ref|YP_003550502.1| phage integrase family protein [Candidatus Puniceispirillum marinum IMCC1322]
>gi|307729968|ref|YP_003907192.1| phage SPO1 DNA polymerase-related protein [Burkholderia sp. CCGE1003]
>gi|307729307|ref|YP_003906531.1| phage SPO1 DNA polymerase-related protein [Burkholderia sp. CCGE1003]
>gi|307724767|ref|YP_003904518.1| phage minor structural protein [Thermoanaerobacter sp. X513]
>gi|307694392|ref|ZP_07636629.1| phage head morphogenesis protein, SPP1 gp7 family [Ruminococcaceae bacterium D16]
>gi|307692909|ref|ZP_07635146.1| lambda family phage portal protein [Ruminococcaceae bacterium D16]
>gi|307692899|ref|ZP_07635136.1| phage tail tape measure protein, TP901 family [Ruminococcaceae bacterium D16]
>gi|307688123|ref|ZP_07630569.1| phage tail tape measure protein, TP901 family [Clostridium cellulovorans 743B]
>gi|307129611|ref|YP_003881627.1| Phage integrase [Dickeya dadantii 3937]
>gi|292905278|ref|YP_003541149.1| phage integrase [Anabaena variabilis ATCC 29413]
>gi|291276437|ref|YP_003516209.1| phage portal protein [Helicobacter mustelae 12198]
>gi|116696315|ref|YP_841891.1| phage integrase family protein [Ralstonia eutropha H16]
>gi|85373646|ref|YP_457708.1| site-specific recombinase, phage integrase family protein [Erythrobacter litoralis HTCC2594]
>gi|85373645|ref|YP_457707.1| site-specific recombinase, phage integrase family protein [Erythrobacter litoralis HTCC2594]
>gi|85372971|ref|YP_457033.1| site-specific recombinase, phage integrase family protein [Erythrobacter litoralis HTCC2594]
>gi|85372970|ref|YP_457032.1| site-specific recombinase, phage integrase family protein [Erythrobacter litoralis HTCC2594]
>gi|78045380|ref|YP_361630.1| phage integrase family protein [Xanthomonas campestris pv. vesicatoria str. 85-10]
>gi|306519608|ref|ZP_07405955.1| phage protein [Clostridium difficile QCD-32g58]
>gi|306519596|ref|ZP_07405943.1| phage terminase large subunit [Clostridium difficile QCD-32g58]
>gi|302131112|ref|ZP_07257102.1| site-specific recombinase, phage integrase family protein [Pseudomonas syringae pv. tomato NCPPB 1108]
>gi|302058347|ref|ZP_07249888.1| site-specific recombinase, phage integrase family protein [Pseudomonas syringae pv. tomato K40]
>gi|301382010|ref|ZP_07230428.1| site-specific recombinase, phage integrase family protein [Pseudomonas syringae pv. tomato Max13]
>gi|283783412|ref|YP_003374166.1| site-specific recombinase, phage integrase family [Gardnerella vaginalis 409-05]
>gi|283783338|ref|YP_003374092.1| phage capsid family protein [Gardnerella vaginalis 409-05]
>gi|259908357|ref|YP_002648713.1| phage shock protein operon transcriptional activator [Erwinia pyrifoliae Ep1/96]
>gi|304316293|ref|YP_003851438.1| phage minor structural protein [Thermoanaerobacterium thermosaccharolyticum DSM 571]
>gi|81299561|ref|YP_399769.1| Phage tail tape measure protein TP901, core region [Synechococcus elongatus PCC 7942]
>gi|81299544|ref|YP_399752.1| Phage portal protein, lambda [Synechococcus elongatus PCC 7942]
>gi|81298947|ref|YP_399155.1| phage integrase [Synechococcus elongatus PCC 7942]
>gi|302877854|ref|YP_003846418.1| phage SPO1 DNA polymerase-related protein [Gallionella capsiferriformans ES-2]
>gi|302876759|ref|YP_003845392.1| phage minor structural protein [Clostridium cellulovorans 743B]
>gi|302873138|ref|YP_003841771.1| phage minor structural protein [Clostridium cellulovorans 743B]
>gi|264678811|ref|YP_003278718.1| phage integrase [Comamonas testosteroni CNB-2]
>gi|264678453|ref|YP_003278360.1| phage integrase [Comamonas testosteroni CNB-2]
>gi|264678075|ref|YP_003277982.1| phage integrase [Comamonas testosteroni CNB-2]
>gi|264678073|ref|YP_003277980.1| phage integrase [Comamonas testosteroni CNB-2]
>gi|264677668|ref|YP_003277574.1| phage integrase [Comamonas testosteroni CNB-2]
>gi|264677571|ref|YP_003277477.1| phage integrase [Comamonas testosteroni CNB-2]
>gi|146277571|ref|YP_001167730.1| phage integrase family protein [Rhodobacter sphaeroides ATCC 17025]
>gi|146276188|ref|YP_001166347.1| phage terminase GpA [Rhodobacter sphaeroides ATCC 17025]
>gi|300717749|ref|YP_003742552.1| Phage tail sheath protein [Erwinia billingiae Eb661]
>gi|300715688|ref|YP_003740491.1| Phage tail collar domain protein [Erwinia billingiae Eb661]
>gi|300714708|ref|YP_003739511.1| Phage Tail Collar domain protein [Erwinia billingiae Eb661]
>gi|300714695|ref|YP_003739498.1| Phage terminase/endonuclease subunit [Erwinia billingiae Eb661]
>gi|296454815|ref|YP_003661959.1| phage integrase family protein [Bifidobacterium longum subsp. longum JDM301]
>gi|296453370|ref|YP_003660513.1| phage integrase family protein [Bifidobacterium longum subsp. longum JDM301]
>gi|296453369|ref|YP_003660512.1| phage integrase family protein [Bifidobacterium longum subsp. longum JDM301]
>gi|288959362|ref|YP_003449703.1| phage integrase [Azospirillum sp. B510]
>gi|288959051|ref|YP_003449392.1| phage portal protein [Azospirillum sp. B510]
>gi|134101615|ref|YP_001107276.1| phage integrase family site specific recombinase [Saccharopolyspora erythraea NRRL 2338]
>gi|134101614|ref|YP_001107275.1| phage integrase family site specific recombinase [Saccharopolyspora erythraea NRRL 2338]
>gi|302382564|ref|YP_003818387.1| phage SPO1 DNA polymerase-related protein [Brevundimonas subvibrioides ATCC 15264]
>gi|302189703|ref|ZP_07266376.1| phage integrase family protein [Pseudomonas syringae pv. syringae 642]
>gi|302185959|ref|ZP_07262632.1| site-specific recombinase, phage integrase family protein [Pseudomonas syringae pv. syringae 642]
>gi|300310209|ref|YP_003774301.1| site-specific phage recombinase/integrase [Herbaspirillum seropedicae SmR1]
>gi|294678453|ref|YP_003579068.1| phage integrase [Rhodobacter capsulatus SB 1003]
>gi|294677620|ref|YP_003578235.1| phage integrase [Rhodobacter capsulatus SB 1003]
>gi|294676507|ref|YP_003577122.1| phage integrase [Rhodobacter capsulatus SB 1003]
>gi|294676493|ref|YP_003577108.1| lambda family phage portal protein [Rhodobacter capsulatus SB 1003]
>gi|296113180|ref|YP_003627118.1| TP901 family phage tail tape measure protein [Moraxella catarrhalis RH4]
>gi|268319324|ref|YP_003292980.1| Phage tail tape measure protein [Lactobacillus johnsonii FI9785]
>gi|39937607|ref|NP_949883.1| Phage integrase [Rhodopseudomonas palustris CGA009]
>gi|33863509|ref|NP_895069.1| phage integrase family protein [Prochlorococcus marinus str. MIT 9313]
>gi|33862507|ref|NP_894067.1| Phage integrase [Prochlorococcus marinus str. MIT 9313]
>gi|298290634|ref|YP_003692573.1| phage SPO1 DNA polymerase-related protein [Starkeya novella DSM 506]
>gi|82699922|ref|YP_414496.1| Phage integrase [Brucella melitensis biovar Abortus 2308]
>gi|218667691|ref|YP_002425322.1| site-specific recombinase, phage integrase family [Acidithiobacillus ferrooxidans ATCC 23270]
>gi|218667294|ref|YP_002425983.1| site-specific recombinase, phage integrase family [Acidithiobacillus ferrooxidans ATCC 23270]
>gi|218666072|ref|YP_002425002.1| site-specific recombinase, phage integrase family [Acidithiobacillus ferrooxidans ATCC 23270]
>gi|218665325|ref|YP_002426785.1| site-specific recombinase, phage integrase family [Acidithiobacillus ferrooxidans ATCC 23270]
>gi|71065925|ref|YP_264652.1| phage integrase [Psychrobacter arcticus 273-4]
>gi|49475135|ref|YP_033176.1| Phage protein gp17 [Bartonella henselae str. Houston-1]
>gi|27363575|ref|NP_759103.1| Phage tail sheath protein FI [Vibrio vulnificus CMCP6]
>gi|161485918|ref|NP_707212.2| phage shock protein operon transcriptional activator [Shigella flexneri 2a str. 301]
>gi|296284779|ref|ZP_06862777.1| phage integrase [Citromicrobium bathyomarinum JL354]
>gi|296276243|ref|ZP_06858750.1| phage tape measure protein [Staphylococcus aureus subsp. aureus MR1]
>gi|296276232|ref|ZP_06858739.1| SPP1 family phage head morphogenesis protein [Staphylococcus aureus subsp. aureus MR1]
>gi|296120473|ref|YP_003628251.1| phage SPO1 DNA polymerase-related protein [Planctomyces limnophilus DSM 3776]
>gi|218704833|ref|YP_002412352.1| phage shock protein operon transcriptional activator [Escherichia coli UMN026]
>gi|218559273|ref|YP_002392186.1| Packaged DNA stabilization protein from phage [Escherichia coli S88]
>gi|218558291|ref|YP_002391204.1| phage shock protein operon transcriptional activator [Escherichia coli S88]
>gi|186687205|ref|YP_001870348.1| phage integrase family protein [Nostoc punctiforme PCC 73102]
>gi|186687194|ref|YP_001870337.1| phage integrase family protein [Nostoc punctiforme PCC 73102]
>gi|295676848|ref|YP_003605372.1| phage SPO1 DNA polymerase-related protein [Burkholderia sp. CCGE1002]
>gi|148559347|ref|YP_001258625.1| phage integrase family site specific recombinase [Brucella ovis ATCC 25840]
>gi|238028289|ref|YP_002912520.1| Phage integrase [Burkholderia glumae BGR1]
>gi|238028261|ref|YP_002912492.1| Phage tail sheath protein [Burkholderia glumae BGR1]
>gi|238027662|ref|YP_002911893.1| Phage integrase family protein [Burkholderia glumae BGR1]
>gi|238025784|ref|YP_002910015.1| Site-specific recombinase, phage integrase family protein [Burkholderia glumae BGR1]
>gi|238023506|ref|YP_002907738.1| Site-specific recombinase, phage integrase family protein [Burkholderia glumae BGR1]
>gi|229606043|ref|YP_002876747.1| phage Integrase [Vibrio cholerae MJ-1236]
>gi|291279109|ref|YP_003495944.1| phage integrase [Deferribacter desulfuricans SSM1]
>gi|238029049|ref|YP_002913274.1| Phage integrase [Burkholderia glumae BGR1]
>gi|226948769|ref|YP_002803860.1| phage tail tape measure protein, TP901 family, core region [Clostridium botulinum A2 str. Kyoto]
>gi|134288840|ref|YP_001111221.1| gp21 [Burkholderia phage phiE255]
>gi|28876271|ref|NP_795533.1| hyaluronoglucosaminidase [Streptococcus pyogenes phage 315.3]
>gi|294505706|ref|YP_003569766.1| phage integrase/recombinase family protein [Bacillus megaterium QM B1551]
>gi|294054594|ref|YP_003548252.1| phage SPO1 DNA polymerase-related protein [Coraliomargarita akajimensis DSM 45221]
>gi|221316948|ref|YP_002533092.1| Phage protein [Bacillus cereus Q1]
>gi|147671699|ref|YP_001215892.1| phage capsid scaffolding protein (GPO) [Vibrio cholerae O395]
>gi|107028777|ref|YP_625872.1| phage SPO1 DNA polymerase-related protein [Burkholderia cenocepacia AU 1054]
>gi|107028590|ref|YP_625685.1| phage integrase [Burkholderia cenocepacia AU 1054]
>gi|89901810|ref|YP_524281.1| phage integrase [Rhodoferax ferrireducens T118]
>gi|89901043|ref|YP_523514.1| phage integrase [Rhodoferax ferrireducens T118]
>gi|75675825|ref|YP_318246.1| phage integrase [Nitrobacter winogradskyi Nb-255]
>gi|75675027|ref|YP_317448.1| Phage integrase [Nitrobacter winogradskyi Nb-255]
>gi|75675004|ref|YP_317425.1| Phage portal protein, lambda [Nitrobacter winogradskyi Nb-255]
>gi|29028593|ref|NP_803283.1| large terminase [Staphylococcus phage 11]
>gi|116662215|ref|YP_829270.1| phage integrase family protein [Arthrobacter sp. FB24]
>gi|103488014|ref|YP_617575.1| phage integrase [Sphingopyxis alaskensis RB2256]
>gi|103487485|ref|YP_617046.1| Phage portal protein, HK97 [Sphingopyxis alaskensis RB2256]
>gi|103485932|ref|YP_615493.1| phage integrase [Sphingopyxis alaskensis RB2256]
>gi|99078526|ref|YP_611784.1| phage integrase [Ruegeria sp. TM1040]
>gi|92113505|ref|YP_573433.1| phage tail sheath protein [Chromohalobacter salexigens DSM 3043]
>gi|78486459|ref|YP_392384.1| Phage integrase [Thiomicrospira crunogena XCL-2]
>gi|78485177|ref|YP_391102.1| Phage integrase [Thiomicrospira crunogena XCL-2]
>gi|78485040|ref|YP_390965.1| Phage tail sheath protein [Thiomicrospira crunogena XCL-2]
>gi|78485024|ref|YP_390949.1| Phage portal protein, lambda [Thiomicrospira crunogena XCL-2]
>gi|78484673|ref|YP_390598.1| Phage integrase [Thiomicrospira crunogena XCL-2]
>gi|78484433|ref|YP_390358.1| Phage integrase [Thiomicrospira crunogena XCL-2]
>gi|123965823|ref|YP_001010904.1| phage integrase family protein [Prochlorococcus marinus str. MIT 9515]
>gi|292491117|ref|YP_003526556.1| phage portal protein, lambda family [Nitrosococcus halophilus Nc4]
>gi|261415275|ref|YP_003248958.1| Abortive phage infection [Fibrobacter succinogenes subsp. succinogenes S85]
>gi|190015705|ref|YP_001967309.1| phage integrase family protein [Bacillus cereus]
>gi|159903068|ref|YP_001550412.1| phage integrase family protein [Prochlorococcus marinus str. MIT 9211]
>gi|124022474|ref|YP_001016781.1| Phage integrase family [Prochlorococcus marinus str. MIT 9303]
>gi|78778909|ref|YP_397021.1| phage integrase family protein [Prochlorococcus marinus str. MIT 9312]
>gi|78214075|ref|YP_382854.1| phage integrase family protein [Synechococcus sp. CC9605]
>gi|78213245|ref|YP_382024.1| phage integrase family protein [Synechococcus sp. CC9605]
>gi|78213231|ref|YP_382010.1| phage integrase family protein [Synechococcus sp. CC9605]
>gi|78212265|ref|YP_381044.1| phage integrase family protein [Synechococcus sp. CC9605]
>gi|283787230|ref|YP_003367095.1| phage tail sheath protein [Citrobacter rodentium ICC168]
>gi|283785675|ref|YP_003365540.1| phage tail sheath protein [Citrobacter rodentium ICC168]
>gi|269202521|ref|YP_003281790.1| phage tail tape measure protein [Staphylococcus aureus subsp. aureus ED98]
>gi|284162601|ref|YP_003401224.1| phage prohead protease, HK97 family [Archaeoglobus profundus DSM 5631]
>gi|262198188|ref|YP_003269397.1| phage SPO1 DNA polymerase-related protein [Haliangium ochraceum DSM 14365]
>gi|262195913|ref|YP_003267122.1| Abortive phage infection [Haliangium ochraceum DSM 14365]
>gi|291009716|ref|ZP_06567689.1| phage integrase family site specific recombinase [Saccharopolyspora erythraea NRRL 2338]
>gi|289676143|ref|ZP_06497033.1| site-specific recombinase, phage integrase family protein [Pseudomonas syringae pv. syringae FF5]
>gi|289675986|ref|ZP_06496876.1| Phage integrase [Pseudomonas syringae pv. syringae FF5]
>gi|289675311|ref|ZP_06496201.1| site-specific recombinase, phage integrase family protein [Pseudomonas syringae pv. syringae FF5]
>gi|289627096|ref|ZP_06460050.1| phage integrase family protein [Pseudomonas syringae pv. aesculi str. NCPPB3681]
>gi|281416269|ref|YP_003347618.1| SLT domain protein [Enterococcus phage phiFL3A]
>gi|288559514|ref|YP_003423000.1| phage integrase [Methanobrevibacter ruminantium M1]
>gi|257136415|ref|YP_003169689.1| tail length tape measure protein [Staphylococcus phage P954]
>gi|239507410|ref|YP_002939721.1| tail length tape measure protein [Staphylococcus phage phiPVL-CN125]
>gi|281416399|ref|YP_003347423.1| tail component protein [Streptococcus phage Abc2]
>gi|119953746|ref|YP_950551.1| tail tape measure protein [Streptococcus phage SMP]
>gi|157325220|ref|YP_001468642.1| gp3 [Listeria phage B025]
>gi|157325004|ref|YP_001468430.1| gp45 [Listeria phage A500]
>gi|268608980|ref|ZP_06142707.1| phage protein [Ruminococcus flavefaciens FD-1]
>gi|261886571|ref|ZP_06010610.1| phage portal protein [Campylobacter fetus subsp. venerealis str. Azul-94]
>gi|261886522|ref|ZP_06010561.1| phage portal protein [Campylobacter fetus subsp. venerealis str. Azul-94]
>gi|261885731|ref|ZP_06009770.1| phage portal protein [Campylobacter fetus subsp. venerealis str. Azul-94]
>gi|260904973|ref|ZP_05913295.1| phage integrase family protein [Brevibacterium linens BL2]
>gi|260168784|ref|ZP_05755595.1| site-specific recombinase, phage integrase family protein [Brucella sp. F5/99]
>gi|260168393|ref|ZP_05755204.1| site-specific recombinase, phage integrase family protein [Brucella sp. F5/99]
>gi|257484096|ref|ZP_05638137.1| phage integrase family site specific recombinase [Pseudomonas syringae pv. tabaci ATCC 11528]
>gi|256784578|ref|ZP_05523009.1| phage integrase family protein [Streptomyces lividans TK24]
>gi|256257553|ref|ZP_05463089.1| Phage integrase [Brucella abortus bv. 9 str. C68]
>gi|256257164|ref|ZP_05462700.1| Phage integrase [Brucella abortus bv. 9 str. C68]
>gi|256255056|ref|ZP_05460592.1| Phage integrase [Brucella ceti B1/94]
>gi|256254665|ref|ZP_05460201.1| Phage integrase [Brucella ceti B1/94]
>gi|256159798|ref|ZP_05457541.1| Phage integrase [Brucella ceti M490/95/1]
>gi|256159368|ref|ZP_05457151.1| Phage integrase [Brucella ceti M490/95/1]
>gi|256113628|ref|ZP_05454448.1| site-specific recombinase, phage integrase family protein [Brucella melitensis bv. 3 str. Ether]
>gi|256061165|ref|ZP_05451318.1| Phage integrase [Brucella neotomae 5K33]
>gi|256060768|ref|ZP_05450930.1| Phage integrase [Brucella neotomae 5K33]
>gi|256044738|ref|ZP_05447642.1| site-specific recombinase, phage integrase family protein [Brucella melitensis bv. 1 str. Rev.1]
>gi|256031654|ref|ZP_05445268.1| Phage integrase [Brucella pinnipedialis M292/94/1]
>gi|256031257|ref|ZP_05444871.1| Phage integrase [Brucella pinnipedialis M292/94/1]
>gi|256027858|ref|ZP_05441692.1| SPP1 family phage head morphogenesis protein [Fusobacterium sp. D11]
>gi|256027856|ref|ZP_05441690.1| PBSX family phage terminase large subunit [Fusobacterium sp. D11]
>gi|256026840|ref|ZP_05440674.1| phage portal protein, lambda family [Fusobacterium sp. D11]
>gi|255652426|ref|ZP_05399328.1| phage integrase family protein [Clostridium difficile QCD-37x79]
>gi|255650074|ref|ZP_05396976.1| phage protein [Clostridium difficile QCD-37x79]
>gi|255650063|ref|ZP_05396965.1| phage protein [Clostridium difficile QCD-37x79]
>gi|255516972|ref|ZP_05384648.1| phage protein [Clostridium difficile QCD-97b34]
>gi|255516961|ref|ZP_05384637.1| phage protein [Clostridium difficile QCD-97b34]
>gi|255314292|ref|ZP_05355875.1| phage protein [Clostridium difficile QCD-76w55]
>gi|255314281|ref|ZP_05355864.1| phage protein [Clostridium difficile QCD-76w55]
>gi|255314279|ref|ZP_05355862.1| phage terminase large subunit [Clostridium difficile QCD-76w55]
>gi|255308825|ref|ZP_05352996.1| phage protein [Clostridium difficile ATCC 43255]
>gi|255308785|ref|ZP_05352956.1| phage protein [Clostridium difficile ATCC 43255]
>gi|255308765|ref|ZP_05352936.1| phage protein [Clostridium difficile ATCC 43255]
>gi|255308757|ref|ZP_05352928.1| phage protein [Clostridium difficile ATCC 43255]
>gi|255103348|ref|ZP_05332325.1| phage integrase family protein [Clostridium difficile QCD-63q42]
>gi|255103025|ref|ZP_05332002.1| phage terminase, large subunit, pbsx family protein [Clostridium difficile QCD-63q42]
>gi|255100662|ref|ZP_05329639.1| phage protein [Clostridium difficile QCD-63q42]
>gi|255100657|ref|ZP_05329634.1| phage protein [Clostridium difficile QCD-63q42]
>gi|255100648|ref|ZP_05329625.1| phage protein [Clostridium difficile QCD-63q42]
>gi|255092555|ref|ZP_05322033.1| phage protein [Clostridium difficile CIP 107932]
>gi|255092544|ref|ZP_05322022.1| phage protein [Clostridium difficile CIP 107932]
>gi|255092542|ref|ZP_05322020.1| phage terminase large subunit [Clostridium difficile CIP 107932]
>gi|254975165|ref|ZP_05271637.1| phage protein [Clostridium difficile QCD-66c26]
>gi|254975154|ref|ZP_05271626.1| phage protein [Clostridium difficile QCD-66c26]
>gi|254823368|ref|ZP_05228369.1| phage integrase family protein [Mycobacterium intracellulare ATCC 13950]
>gi|254821280|ref|ZP_05226281.1| phage integrase family protein [Mycobacterium intracellulare ATCC 13950]
>gi|254777686|ref|ZP_05219202.1| phage integrase family protein [Mycobacterium avium subsp. avium ATCC 25291]
>gi|254730337|ref|ZP_05188915.1| Phage integrase [Brucella abortus bv. 4 str. 292]
>gi|254729947|ref|ZP_05188525.1| Phage integrase [Brucella abortus bv. 4 str. 292]
>gi|254718782|ref|ZP_05180593.1| Phage integrase [Brucella sp. 83/13]
>gi|254717173|ref|ZP_05178984.1| Phage integrase [Brucella ceti M13/05/1]
>gi|254716784|ref|ZP_05178595.1| Phage integrase [Brucella ceti M13/05/1]
>gi|254714158|ref|ZP_05175969.1| Phage integrase [Brucella ceti M644/93/1]
>gi|254713770|ref|ZP_05175581.1| Phage integrase [Brucella ceti M644/93/1]
>gi|254710159|ref|ZP_05171970.1| Phage integrase [Brucella pinnipedialis B2/94]
>gi|254709767|ref|ZP_05171578.1| Phage integrase [Brucella pinnipedialis B2/94]
>gi|254707651|ref|ZP_05169479.1| Phage integrase [Brucella pinnipedialis M163/99/10]
>gi|254706734|ref|ZP_05168562.1| Phage integrase [Brucella pinnipedialis M163/99/10]
>gi|254704369|ref|ZP_05166197.1| site-specific recombinase, phage integrase family protein [Brucella suis bv. 3 str. 686]
>gi|254703973|ref|ZP_05165801.1| Phage integrase [Brucella suis bv. 3 str. 686]
>gi|254701826|ref|ZP_05163654.1| Phage integrase [Brucella suis bv. 5 str. 513]
>gi|254701722|ref|ZP_05163550.1| Phage integrase [Brucella suis bv. 5 str. 513]
>gi|254701428|ref|ZP_05163256.1| Phage integrase [Brucella suis bv. 5 str. 513]
>gi|254697439|ref|ZP_05159267.1| Phage integrase [Brucella abortus bv. 2 str. 86/8/59]
>gi|254697049|ref|ZP_05158877.1| Phage integrase [Brucella abortus bv. 2 str. 86/8/59]
>gi|254693787|ref|ZP_05155615.1| Phage integrase [Brucella abortus bv. 3 str. Tulya]
>gi|254693398|ref|ZP_05155226.1| Phage integrase [Brucella abortus bv. 3 str. Tulya]
>gi|254689303|ref|ZP_05152557.1| Phage integrase [Brucella abortus bv. 6 str. 870]
>gi|254688916|ref|ZP_05152170.1| Phage integrase [Brucella abortus bv. 6 str. 870]
>gi|253314569|ref|ZP_04837782.1| phage tape measure protein [Staphylococcus aureus subsp. aureus str. CF-Marseille]
>gi|31415850|ref|NP_852590.1| Portal protein [Bacillus phage phBC6A52]
>gi|240173391|ref|ZP_04752049.1| phage integrase family protein [Mycobacterium kansasii ATCC 12478]
>gi|240172534|ref|ZP_04751193.1| phage integrase family protein [Mycobacterium kansasii ATCC 12478]
>gi|239995901|ref|ZP_04716425.1| phage integrase [Alteromonas macleodii ATCC 27126]
>gi|239987688|ref|ZP_04708352.1| phage integrase family site specific recombinase [Streptomyces roseosporus NRRL 11379]
>gi|239941232|ref|ZP_04693169.1| phage integrase family site specific recombinase [Streptomyces roseosporus NRRL 15998]
>gi|239941212|ref|ZP_04693149.1| phage integrase family site specific recombinase [Streptomyces roseosporus NRRL 15998]
>gi|239928926|ref|ZP_04685879.1| phage integrase family protein [Streptomyces ghanaensis ATCC 14672]
>gi|237803732|ref|ZP_04591317.1| lambda family phage tail tape measure protein [Pseudomonas syringae pv. oryzae str. 1_6]
>gi|237803388|ref|ZP_04590973.1| Phage tail tape measure protein TP901, core region [Pseudomonas syringae pv. oryzae str. 1_6]
>gi|237797254|ref|ZP_04585715.1| phage integrase family site specific recombinase [Pseudomonas syringae pv. oryzae str. 1_6]
>gi|41189523|ref|NP_958604.1| 77ORF008 [Staphylococcus phage 77]
>gi|32469469|ref|NP_862877.1| gp38 [Streptococcus phage SM1]
>gi|32469424|ref|NP_862888.1| PblA [Streptococcus phage SM1]
>gi|30039744|ref|NP_835472.1| DNA replication initiation protein [Vibrio phage VGJphi]
>gi|29566318|ref|NP_817885.1| gp34 [Mycobacterium phage Corndog]
>gi|158341559|ref|YP_001522723.1| phage integrase [Acaryochloris marina MBIC11017]
>gi|158341027|ref|YP_001522194.1| phage integrase [Acaryochloris marina MBIC11017]
>gi|156564220|ref|YP_001429761.1| DNA polymerase III alpha subunit [Bacillus phage 0305phi8-36]
>gi|156564218|ref|YP_001429728.1| Gram-positive endolysin [Bacillus phage 0305phi8-36]
>gi|156564206|ref|YP_001429716.1| nrd alpha subunit [Bacillus phage 0305phi8-36]
>gi|156564180|ref|YP_001429690.1| virion structural protein [Bacillus phage 0305phi8-36]
>gi|156564163|ref|YP_001429673.1| dnaB [Bacillus phage 0305phi8-36]
>gi|156564156|ref|YP_001429666.1| virion structural protein [Bacillus phage 0305phi8-36]
>gi|156564154|ref|YP_001429664.1| low copy number virion structural protein [Bacillus phage 0305phi8-36]
>gi|156564153|ref|YP_001429663.1| low copy number virion structural protein [Bacillus phage 0305phi8-36]
>gi|156564152|ref|YP_001429662.1| virion structural protein [Bacillus phage 0305phi8-36]
>gi|156564149|ref|YP_001429659.1| virion structural protein [Bacillus phage 0305phi8-36]
>gi|156564148|ref|YP_001429658.1| virion structural protein [Bacillus phage 0305phi8-36]
>gi|156564147|ref|YP_001429657.1| virion structural protein [Bacillus phage 0305phi8-36]
>gi|156564146|ref|YP_001429656.1| virion structural protein [Bacillus phage 0305phi8-36]
>gi|156564145|ref|YP_001429655.1| virion structural protein [Bacillus phage 0305phi8-36]
>gi|156564143|ref|YP_001429653.1| low copy number virion structural protein [Bacillus phage 0305phi8-36]
>gi|156564139|ref|YP_001429649.1| virion structural protein [Bacillus phage 0305phi8-36]
>gi|156564136|ref|YP_001429646.1| virion structural protein [Bacillus phage 0305phi8-36]
>gi|156564135|ref|YP_001429645.1| virion structural protein [Bacillus phage 0305phi8-36]
>gi|156564134|ref|YP_001429644.1| virion structural protein [Bacillus phage 0305phi8-36]
>gi|156564128|ref|YP_001429638.1| baseplate hub protein [Bacillus phage 0305phi8-36]
>gi|156564126|ref|YP_001429636.1| virion structural protein [Bacillus phage 0305phi8-36]
>gi|156564123|ref|YP_001429633.1| virion structural protein [Bacillus phage 0305phi8-36]
>gi|156564122|ref|YP_001429632.1| virion structural protein [Bacillus phage 0305phi8-36]
>gi|156564120|ref|YP_001429630.1| tail sheath subunit [Bacillus phage 0305phi8-36]
>gi|156564114|ref|YP_001429624.1| virion structural protein [Bacillus phage 0305phi8-36]
>gi|156564113|ref|YP_001429623.1| virion structural protein [Bacillus phage 0305phi8-36]
>gi|156564111|ref|YP_001429621.1| virion structural protein [Bacillus phage 0305phi8-36]
>gi|156564110|ref|YP_001429620.1| major virion structural protein [Bacillus phage 0305phi8-36]
>gi|156564108|ref|YP_001429618.1| virion structural protein [Bacillus phage 0305phi8-36]
>gi|156564104|ref|YP_001429613.1| protease/scaffold [Bacillus phage 0305phi8-36]
>gi|156564103|ref|YP_001429612.1| portal protein [Bacillus phage 0305phi8-36]
>gi|156564100|ref|YP_001429609.1| candidate for curly fiber subunit based on high copy number in virion [Bacillus phage 0305phi8-36]
>gi|156564099|ref|YP_001429608.1| low copy number virion structural protein [Bacillus phage 0305phi8-36]
>gi|156564098|ref|YP_001429607.1| terminase large subunit [Bacillus phage 0305phi8-36]
>gi|156564062|ref|YP_001429805.1| RecJ [Bacillus phage 0305phi8-36]
>gi|156564016|ref|YP_001429755.1| RecA [Bacillus phage 0305phi8-36]
>gi|156564011|ref|YP_001429750.1| PcrA helicase [Bacillus phage 0305phi8-36]
>gi|148717898|ref|YP_001285370.1| tape measure protein [Staphylococcus phage 80alpha]
>gi|148717886|ref|YP_001285358.1| minor head protein [Staphylococcus phage 80alpha]
>gi|16271805|ref|NP_438142.1| minor capsid protein [Temperate phage phiNIH1.1]
>gi|158997724|ref|NP_944260.2| Bcep22gp31 [Burkholderia phage Bcep22]
>gi|156604055|ref|YP_001430000.1| portal protein [Staphylococcus phage tp310-3]
>gi|156603925|ref|YP_001429872.1| portal protein [Staphylococcus phage tp310-1]
>gi|155042936|ref|YP_001425603.1| Phage capsid protein [Bacillus virus 1]
>gi|146275536|ref|YP_001165697.1| phage integrase domain/SAM domain-containing protein [Novosphingobium aromaticivorans DSM 12444]
>gi|119443691|ref|YP_918929.1| portal protein [Staphylococcus phage phiPVL108]
>gi|117530289|ref|YP_851132.1| terminase [Microcystis phage Ma-LMM01]
>gi|115304298|ref|YP_762597.1| terminase [Lactococcus phage Q54]
>gi|109521852|ref|YP_655289.1| gp12 [Mycobacterium phage Pipefish]
>gi|109521771|ref|YP_655693.1| gp13 [Mycobacterium phage Qyrzula]
>gi|109393342|ref|YP_656140.1| gp132 [Mycobacterium phage Catera]
>gi|109393333|ref|YP_656131.1| gp123 [Mycobacterium phage Catera]
>gi|109392486|ref|YP_655615.1| gp36 [Mycobacterium phage Che12]
>gi|109392467|ref|YP_655596.1| gp17 [Mycobacterium phage Che12]
>gi|109392294|ref|YP_655524.1| gp7 [Mycobacterium phage Halo]
>gi|109391855|ref|YP_655105.1| gp9 [Mycobacterium phage Orion]
>gi|91214231|ref|NP_918994.2| prohead protease ClpP [Burkholderia phage BcepNazgul]
>gi|89152482|ref|YP_512313.1| portal protein [Bacillus phage Fah]
>gi|66395598|ref|YP_239936.1| ORF010 [Staphylococcus phage 3A]
>gi|66395516|ref|YP_239857.1| ORF008 [Staphylococcus phage 42E]
>gi|66395461|ref|YP_239800.1| ORF011 [Staphylococcus phage 2638A]
>gi|38640379|ref|NP_944302.1| Bcep22gp74 [Burkholderia phage Bcep22]
>gi|38640373|ref|NP_944296.1| Bcep22gp67 [Burkholderia phage Bcep22]
>gi|38640372|ref|NP_944295.1| Bcep22gp66 [Burkholderia phage Bcep22]
>gi|38640370|ref|NP_944293.1| Bcep22gp64 [Burkholderia phage Bcep22]
>gi|38640361|ref|NP_944284.1| Bcep22gp55 [Burkholderia phage Bcep22]
>gi|38640358|ref|NP_944281.1| Bcep22gp52 [Burkholderia phage Bcep22]
>gi|38640357|ref|NP_944280.1| Bcep22gp51 [Burkholderia phage Bcep22]
>gi|38640313|ref|NP_944234.1| Bcep22gp05 [Burkholderia phage Bcep22]
>gi|34610177|ref|NP_919002.1| DNA polymerase I [Burkholderia phage BcepNazgul]
>gi|34610157|ref|NP_918982.1| conserved tail assembly protein [Burkholderia phage BcepNazgul]
[truncated: 8,929 more rows]
