# Supplementary material for: Artificial Neural Networks Trained to Detect Viral and Phage Structural Proteins
Source: PLOS journal article supplement (doi:10.1371/journal.pcbi.1002657), 2012-08-23

Best Validation Performance is 0.54679 at epoch 9

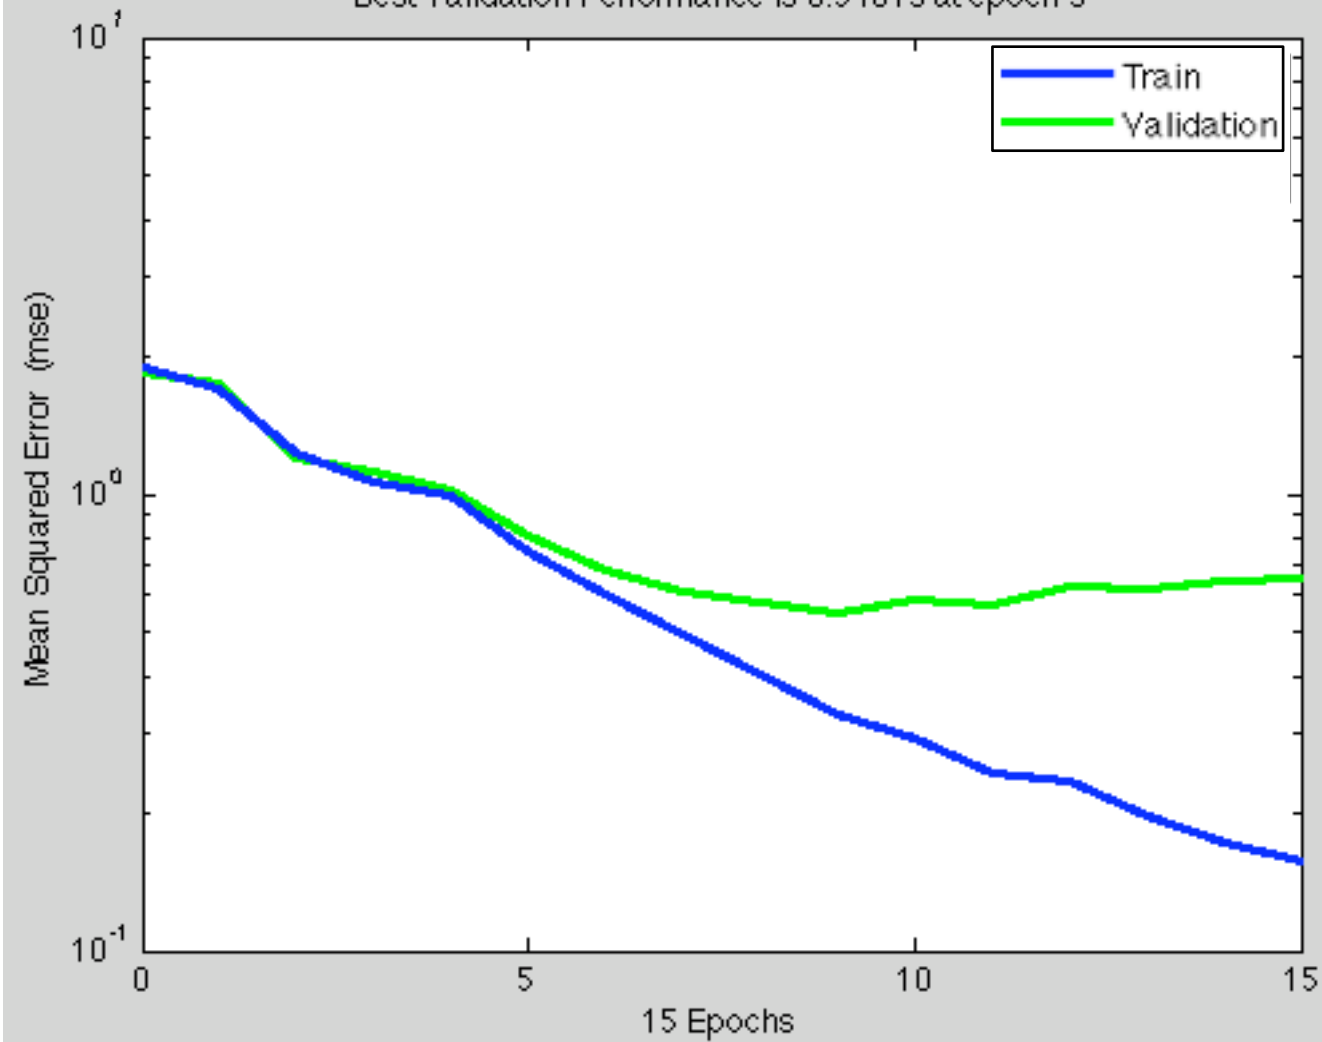

Supplement: S11 (10.1371/journal.pcbi.1002657.s011) [file journal.pcbi.1002657.s011]
