# Supplementary material for: Artificial Neural Networks Trained to Detect Viral and Phage Structural Proteins
Source: PLoS Comput Biol. 2012 Aug 23;8(8):e1002657. doi: 10.1371/journal.pcbi.1002657 (PMC3426561; doi:10.1371/journal.pcbi.1002657)
Supplement: Table S3 — Keywords used to remove unwanted sequences from MCP and tail positive sequences. (PDF) [file pcbi.1002657.s014.pdf]

|                             |                            |                               |
|-----------------------------|----------------------------|-------------------------------|
| Prion                       | Crystal Structure Of       | specificity protein           |
| Contractile sheath          | terminase                  | holin                         |
| Base Plate                  | tape Measure               | Antiterminat                  |
| Collar                      | portal                     | replication protein           |
| Connector Protein           | topoisomerase              | exclusion suppressor          |
| size determination          | endonuclease               | tolerance to group            |
| Polymerase                  | sheath protein             | transposon                    |
| IRES                        | Joining protein            | encapsidation                 |
| Assembly Protein            | recombinase                | scaffold                      |
| Human                       | integrase                  | hemolysin                     |
| Yeast                       | DNA stabilization protein  | methylase                     |
| Spike                       | Eukary                     | regulator                     |
| nucleocapsid                | nuclear disruption protein | lysozome                      |
| Control Gene                | resistance protein         | translocat                    |
| polymerase                  | transcription factor       | partitioning protein          |
| RNA complex                 | sigma factor               | hydrolase                     |
| operator*complex            | reductase                  | resistance                    |
| Stem Protein                | synthase                   | adsorption                    |
| Replicase                   | deaminase                  | endoneuraminidase             |
| (Major Minor) inner protein | lysis inhibition           | internal virion protein       |
| Glycoprotein                | DNA binding                | head-tail (adaptor connector) |
| utilization protein         | ligase                     | Amidase                       |
| Loop RNA complex            | hydrolase                  | ATPase                        |
| mismatch repair protein     | lysozyme                   | (head capsid)-like protein    |
| Assembly Protein            | synthetase                 | host range protein            |
| Packaging protein           | kinase                     | Entire Lipid-Containing       |
| maturation protein          | doxin                      | transaminase                  |
| scaffolding protein         | transferase                | transferase                   |
| morphogenesis protein       | repressor                  | NADH dehydrogenase            |
| packaging NTPase            | recombination              | desulfurase                   |
| protease                    | hydroxymethylase           | hydratase                     |
| Full*Protein                | degradation                | deformylase                   |
| peptidase                   | exonuclease                | oxononanoate synthase         |
| encapsidation protein       | integrase                  | binding protein               |
| Fitting Of                  | cytotoxin                  |                               |
| gene transfer agent         | shock protein              |                               |
